# Supplementary material for: New guaiane-type sesquiterpenoid dimers from Artemisia atrovirens and their antihepatoma activity
Source: PubMed Central journal article supplement — Acta Pharm Sin B. 2020 Dec 15;11(6):1648–66. doi: 10.1016/j.apsb.2020.12.006 (PMC8245908; doi:10.1016/j.apsb.2020.12.006), 2020-12-15
Supplement: mmc1.pdf [file mmc1.pdf]

## Supporting Information for

### Original article

#### **New guaiane-type sesquiterpenoid dimers from *Artemisia atrovirens* and their antihepatoma activity**

Lihua Su<sup>a,b</sup>, Xintian Zhang<sup>a,b</sup>, Yunbao Ma<sup>a</sup>, Changan Geng<sup>a</sup>, Xiaoyan Huang<sup>a</sup>, Jing Hu<sup>a</sup>, Tianze Li<sup>a</sup>, Shuang Tang<sup>a,b</sup>, Cheng Shen<sup>a,b</sup>, Zhen Gao<sup>a,b</sup>, Xuemei Zhang<sup>a</sup>, Ji-jun Chen<sup>a,b,\*</sup>

<sup>a</sup>*State Key Laboratory of Phytochemistry and Plant Resources in West China, Kunming Institute of Botany, Chinese Academy of Sciences; Yunnan Key Laboratory of Natural Medicinal Chemistry, Kunming 650201, China*

<sup>b</sup>*University of Chinese Academy of Sciences, Beijing 100049, China*

\*Corresponding author. Tel: + 86 871 65223265; fax: + 86 871 65227197.

E-mail address: [chenjj@mail.kib.ac.cn](mailto:chenjj@mail.kib.ac.cn) (Ji-jun Chen).

Received 26 September 2020; received in revised form 15 November 2020; accepted 7 December 2020

## Contents

|     |                                                                |     |
|-----|----------------------------------------------------------------|-----|
| 1.  | General experimental procedures .....                          | 4   |
| 2.  | NMR, MS, IR, $[\alpha]_D$ and CD spectra of compound 1.....    | 5   |
| 3.  | NMR, MS, IR, $[\alpha]_D$ and CD spectra of compound 2.....    | 10  |
| 4.  | NMR, MS, IR, $[\alpha]_D$ and CD spectra of compound 3.....    | 15  |
| 5.  | NMR, MS, IR, $[\alpha]_D$ and CD spectra of compound 4.....    | 20  |
| 6.  | NMR, MS, IR, $[\alpha]_D$ and CD spectra of compound 5.....    | 25  |
| 7.  | NMR, MS, IR, $[\alpha]_D$ and CD spectra of compound 6.....    | 30  |
| 8.  | NMR, MS, IR, $[\alpha]_D$ and CD spectra of compound 7.....    | 35  |
| 9.  | NMR, MS, IR, $[\alpha]_D$ and CD spectra of compound 8.....    | 40  |
| 10. | NMR, MS, IR, $[\alpha]_D$ and CD spectra of compound 9.....    | 45  |
| 11. | NMR, MS, IR, $[\alpha]_D$ and CD spectra of compound 10.....   | 50  |
| 12. | NMR, MS, IR, $[\alpha]_D$ and CD spectra of compound 11.....   | 55  |
| 13. | NMR, MS, IR, $[\alpha]_D$ and CD spectra of compound 12.....   | 60  |
| 14. | NMR, MS, IR, $[\alpha]_D$ and CD spectra of compound 13.....   | 65  |
| 15. | NMR, MS, IR, $[\alpha]_D$ and CD spectra of compound 14.....   | 70  |
| 16. | NMR, MS, IR, $[\alpha]_D$ and CD spectra of compound 15.....   | 75  |
| 17. | NMR, MS, IR, $[\alpha]_D$ and CD spectra of compound 16.....   | 80  |
| 18. | NMR, MS, IR, $[\alpha]_D$ and CD spectra of compound 17.....   | 85  |
| 19. | NMR, MS, IR, $[\alpha]_D$ and CD spectra of compound 18.....   | 90  |
| 20. | NMR, MS, IR, $[\alpha]_D$ and CD spectra of compound 19.....   | 95  |
| 21. | NMR, MS, IR, $[\alpha]_D$ and CD spectra of compound 20.....   | 100 |
| 22. | NMR, MS, IR, $[\alpha]_D$ and CD spectra of compound 21.....   | 105 |
| 23. | NMR, MS, IR, $[\alpha]_D$ and CD spectra of compound 22.....   | 110 |
| 24. | NMR, MS, IR, $[\alpha]_D$ and CD spectra of compound 23.....   | 115 |
| 25. | Cytotoxicity assays .....                                      | 123 |
|     | 24.1. Cell lines and cell culture .....                        | 123 |
|     | 24.2. MTT assay .....                                          | 123 |
|     | References .....                                               | 125 |
| 26. | Computational data of compounds 2, 5–8, 11, 14–18, and 22..... | 125 |

|     |                                                                                                               |     |
|-----|---------------------------------------------------------------------------------------------------------------|-----|
|     | References .....                                                                                              | 126 |
| 27. | Table S1 Guaiane dimers from the <i>Artemisia</i> species.....                                                | 211 |
| 28. | Comparison of $^1\text{H}$ and $^{13}\text{C}$ NMR spectroscopic data for compounds 3, 4, 9, 12, and 23 ..... | 212 |

## 1. General experimental procedures

Melting points were obtained on an SGW<sup>®</sup> X-4B microscopic melting point apparatus (Shanghai Precision & Scientific Instrument Co., Ltd., Shanghai, China). Optical rotations were measured in MeOH with an Autopol VI (Serial #91058) polarimeter (Rudolph Research Analytical, Hackettstown, NJ, USA). The ECD spectra were recorded on a Chirascan CD spectrometer (Applied Photophysics Ltd., Leatherhead, UK). IR spectra were obtained on a Nicolet iS10 spectrometer (Thermo Fisher Scientific, Madison, WI, USA) using KBr pellets. 1D and 2D NMR experiments were carried out using Avance III HD 400 (Bruker, Bremerhaven, Germany) and Avance III 600 (Bruker, Faellanden, Switzerland) spectrometers with TMS as the internal standard. X-ray crystallographic analyses using Cu K $\alpha$  radiation were performed on a Bruker D8 QUEST instrument (Bruker, Karlsruhe, Germany). High resolution mass spectra were acquired on a Shimadzu LC/MS-IT-TOF mass spectrometer (Shimadzu, Kyoto, Japan). TLC detections were performed on silica gel HSGF254 plates (Yantai Jiangyou Silica Gel Development Co., Ltd., Yantai, China), and compounds were visualized by heating after spraying with 10% H<sub>2</sub>SO<sub>4</sub> in ethanol. Silica gel (200–300 mesh, Qingdao Makall Group Co., Ltd., Qingdao, China) and Sephadex LH-20 (GE Healthcare Bio-Sciences AB, Uppsala, Sweden) were used for column chromatography. MPLC separations were achieved on a Dr-Flash II apparatus (Lisui, Suzhou, China) using an MCI gel CHP 20P column (75–150  $\mu$ m, Mitsubishi Chemical Corporation, Tokyo, Japan). Preparative HPLC purification was performed on a Waters 2988 system (Waters, Milford, Massachusetts, USA) with the Waters XBridge<sup>®</sup> Prep OBD<sup>™</sup> C18 column (5  $\mu$ m, 19  $\times$  250 mm, Waters, Ireland). Semipreparative HPLC purification was performed on a Shimadzu LC-CBM-20 system (Shimadzu, Kyoto, Japan) with an Agilent Eclipse XDB-C18 column (5  $\mu$ m, 9.4  $\times$  250 mm, Agilent Technologies, Santa Clara, CA, USA).

Cell cycle and apoptosis assays were performed on a flow cytometer (FACSCalibur, Becton Dickinson Co., Ltd., New Jersey, USA). Western blot assay was conducted on vertical electrophoresis apparatus (DYCZ-24DN, Liuyi Biotechnology Co., Ltd., Beijing, China) and a Semi-Dry Blotter (YRDIMES, wealtec Co., Ltd., Nevada, USA.), exposed by MultiSpectral imaging system (BioSpectrum, Analytik Jena Co., Ltd., Jena, Germany).

## 2. NMR, MS, IR, $[\alpha]_D$ and CD spectra of compound 1

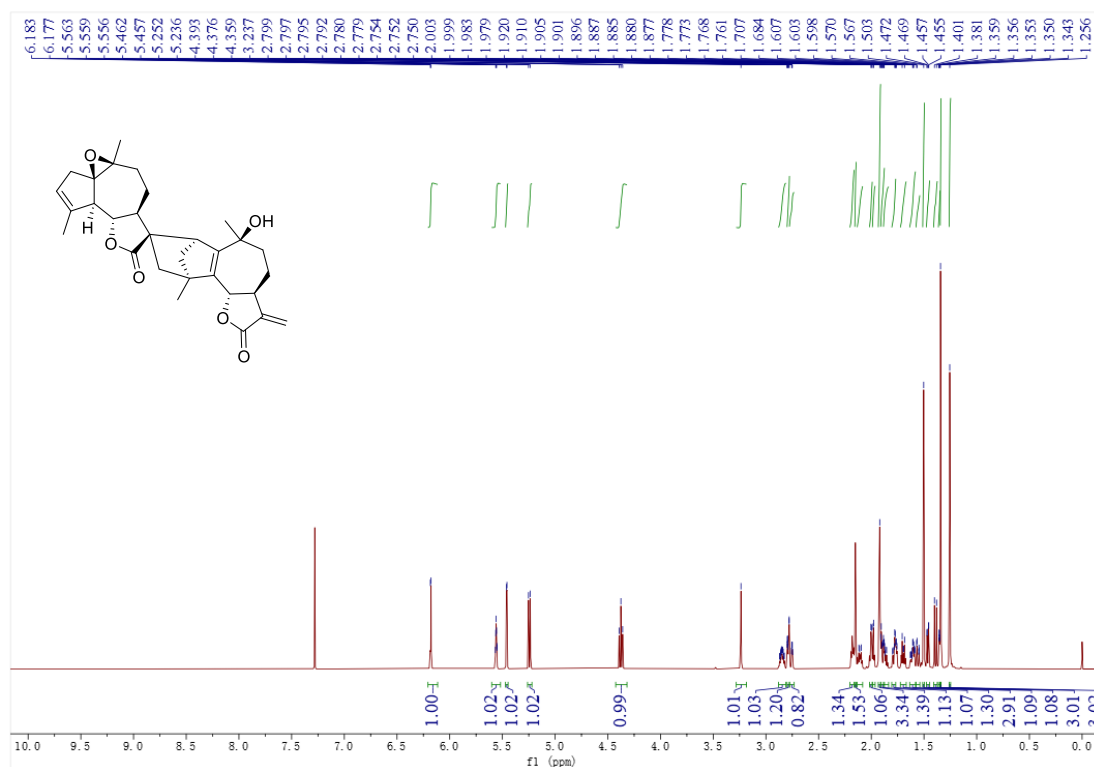

**Figure S1**  $^1\text{H}$  NMR spectrum (600 MHz) of artematrolide A (**1**) in  $\text{CDCl}_3$ .

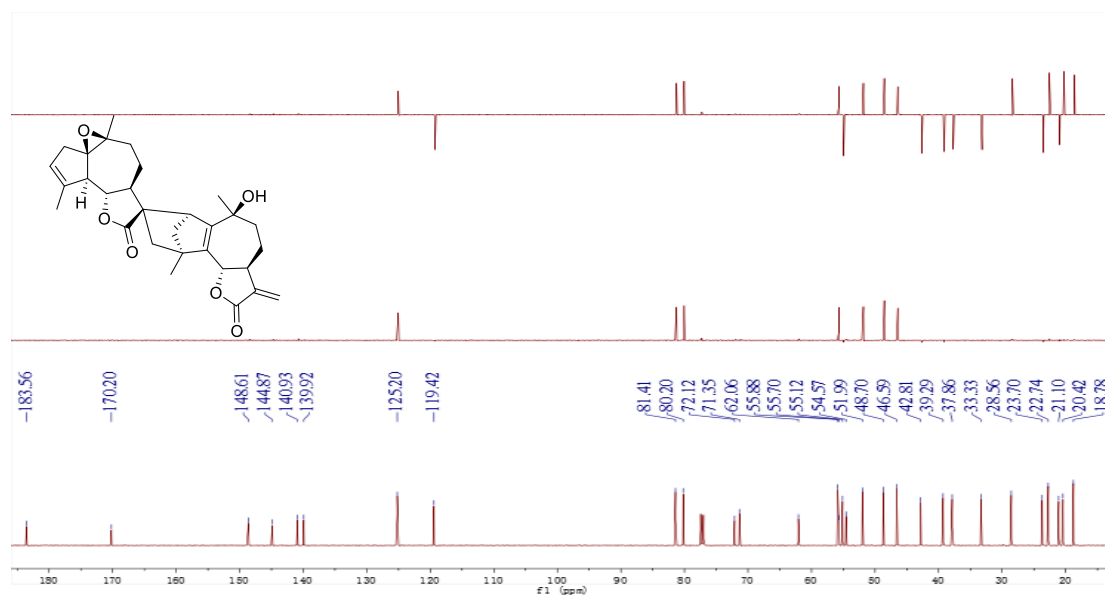

**Figure S2**  $^{13}\text{C}$  NMR spectra (150 MHz) of artematrolide A (**1**) in  $\text{CDCl}_3$ .

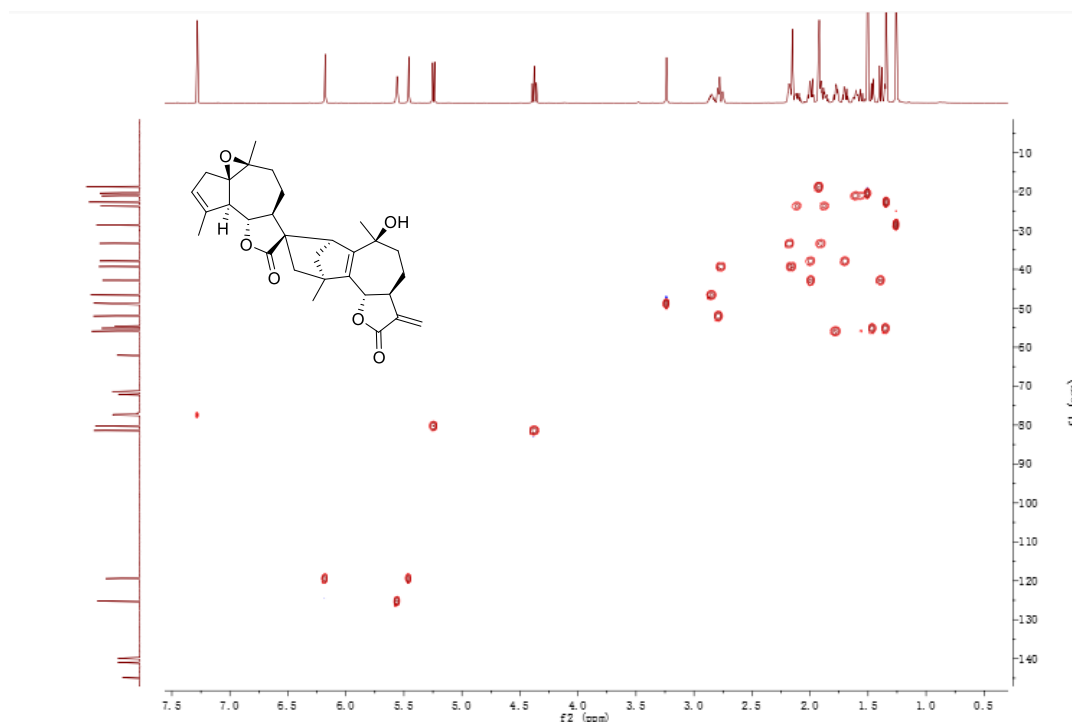

**Figure S3** HSQC spectrum (600 MHz) of artematrolide A (**1**) in CDCl<sub>3</sub>.

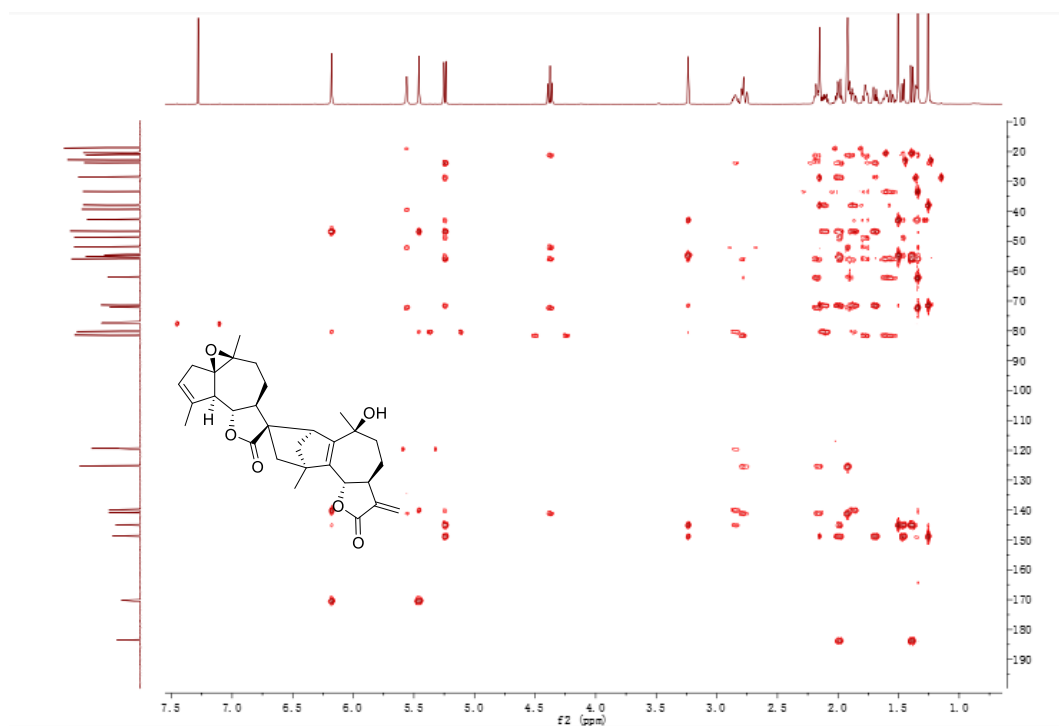

**Figure S4** HMBC spectrum (600 MHz) of artematrolide A (**1**) in CDCl<sub>3</sub>.

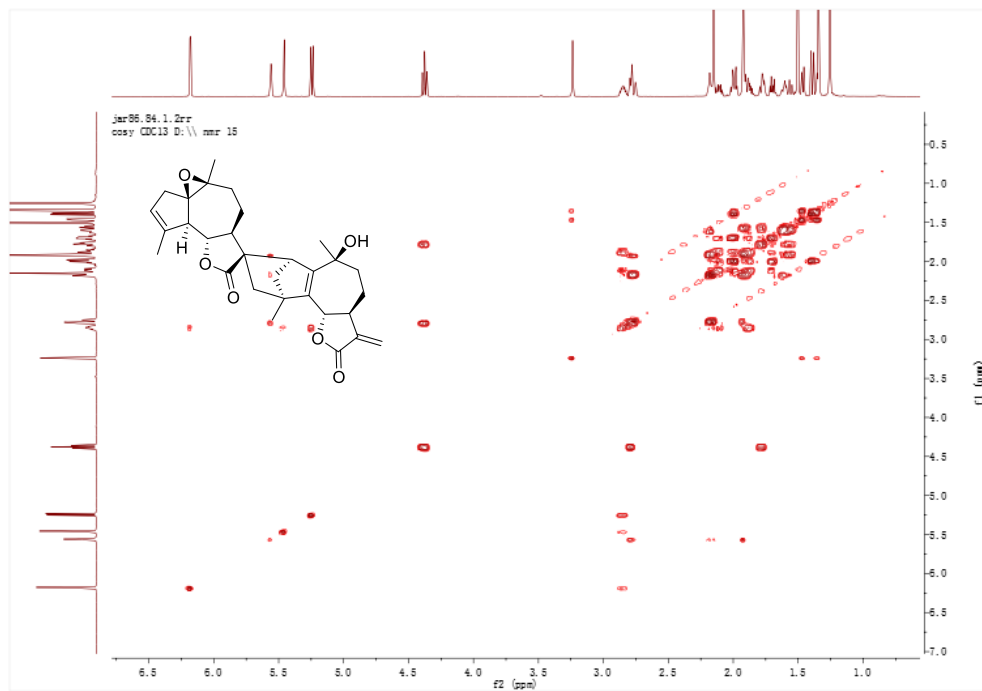

**Figure S5**  $^1\text{H}$ - $^1\text{H}$  COSY spectrum (600 MHz) of artematrolide A (**1**) in  $\text{CDCl}_3$ .

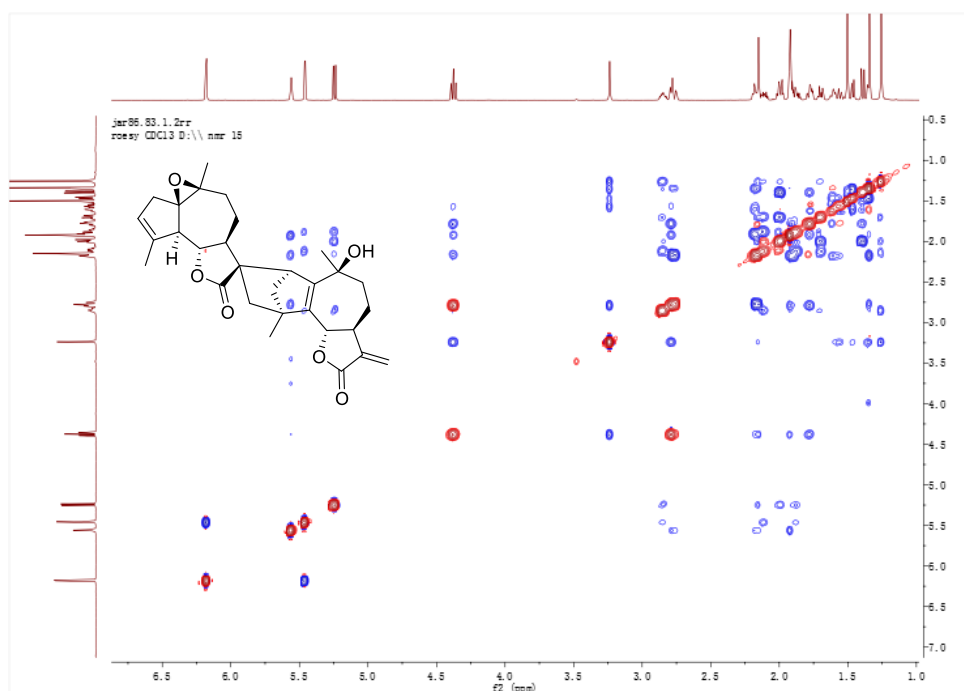

**Figure S6** ROESY spectrum (600 MHz) of artematrolide A (**1**) in  $\text{CDCl}_3$ .

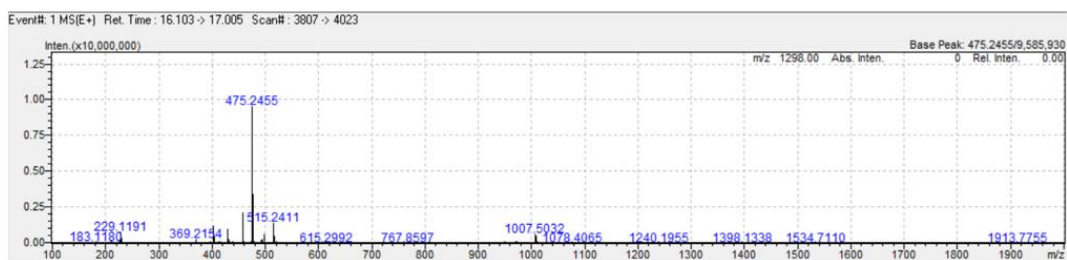

Figure S7 HRESIMS spectrum of artematrolide A (1).

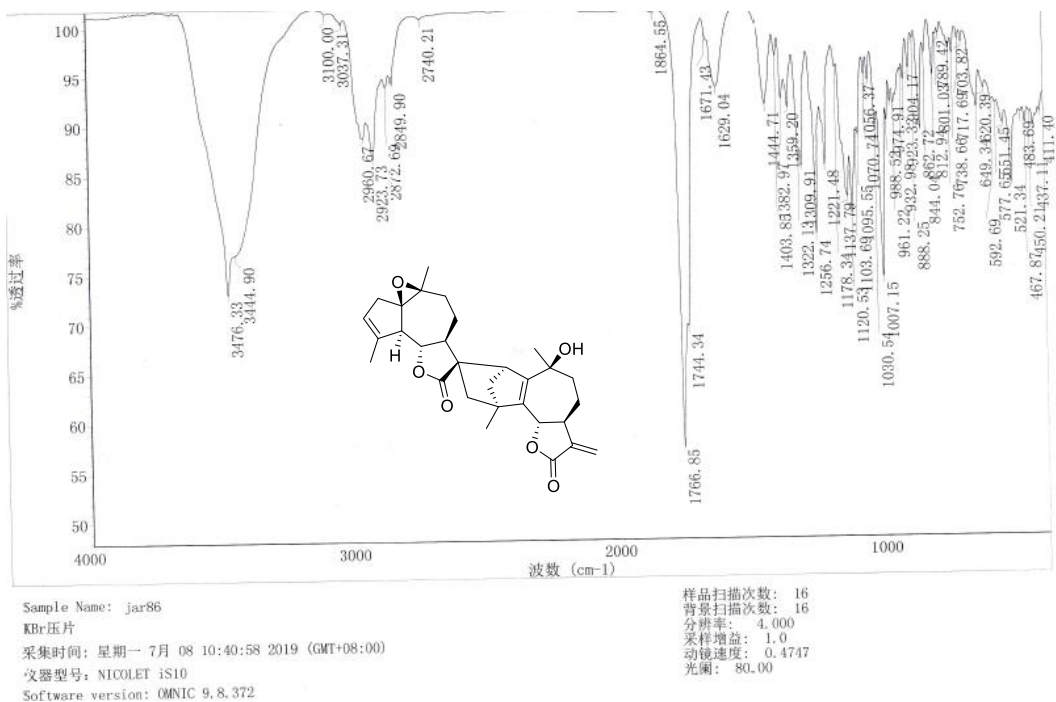

Figure S8 IR spectrum of artematrolide A (1).

**Rudolph Research Analytical**

This sample was measured on an Autopol VI, Serial #91058  
 Manufactured by Rudolph Research Analytical, Hackettstown, NJ, USA.

Measurement Date : Monday, 08-JUL-2019

Set Temperature : OFF

Time Delay : Disabled

Delay between Measurement : Disabled

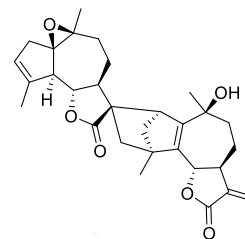

| n | Average | Std.Dev. | % RSD | Maximum | Minimum |
|---|---------|----------|-------|---------|---------|
| 5 | 29.79   | 0.54     | 1.81  | 30.36   | 29.29   |

  

| S.No | Sample ID | Time        | Result | Scale | OR °Arc | WLG.nm | Lq.mm  | Conc.g/100ml | Temp. |
|------|-----------|-------------|--------|-------|---------|--------|--------|--------------|-------|
| 1    | jar86     | 05:12:12 PM | 29.29  | SR    | 0.0082  | 589    | 100.00 | 0.028        | 24.6  |
| 2    | jar86     | 05:12:20 PM | 30.36  | SR    | 0.0085  | 589    | 100.00 | 0.028        | 24.6  |
| 3    | jar86     | 05:12:28 PM | 29.29  | SR    | 0.0082  | 589    | 100.00 | 0.028        | 24.5  |
| 4    | jar86     | 05:12:36 PM | 29.64  | SR    | 0.0083  | 589    | 100.00 | 0.028        | 24.5  |
| 5    | jar86     | 05:12:44 PM | 30.36  | SR    | 0.0085  | 589    | 100.00 | 0.028        | 24.5  |

Figure S9 Optical rotation spectrum of artematrolide A (1).



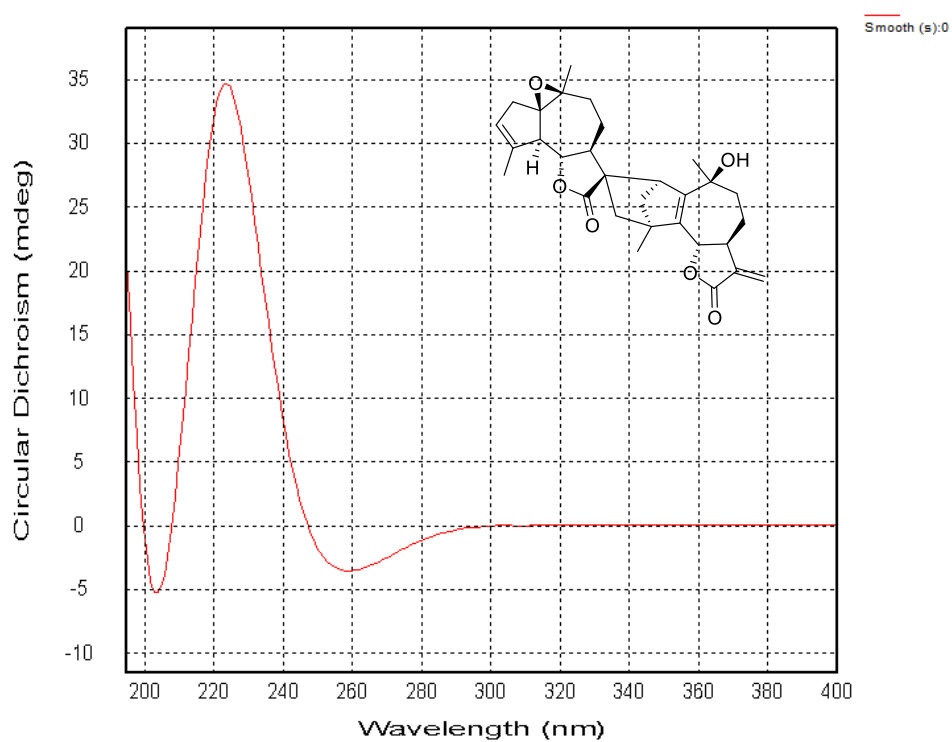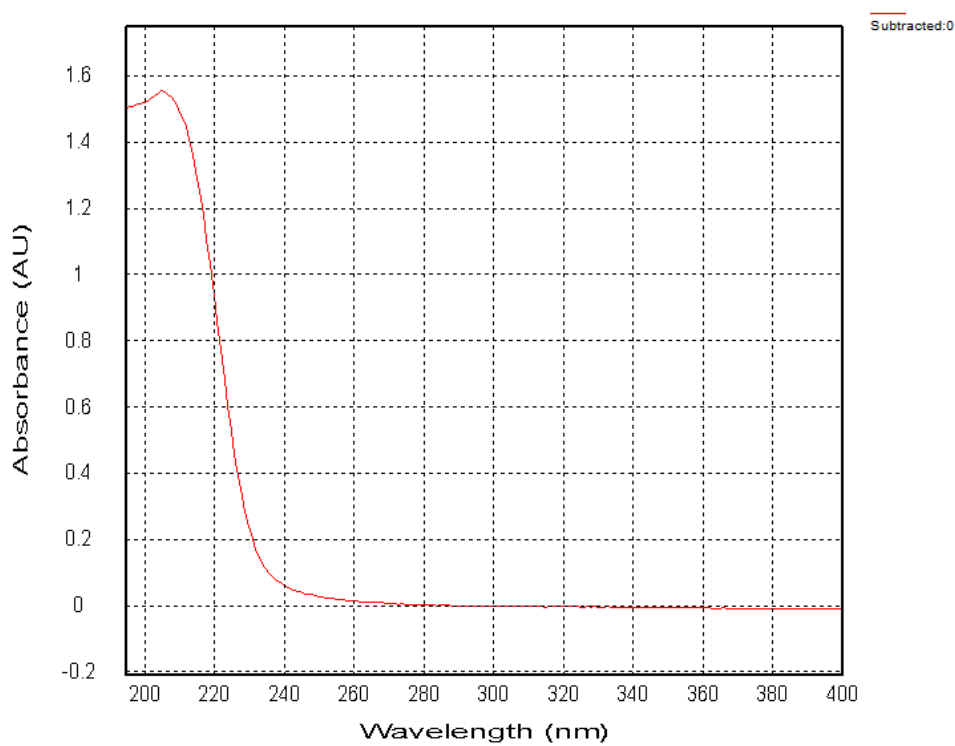

**Figure S10** CD (top) and UV (bottom) spectra of artematrolide A (**1**).

### 3. NMR, MS, IR, $[\alpha]_D$ and CD spectra of compound 2

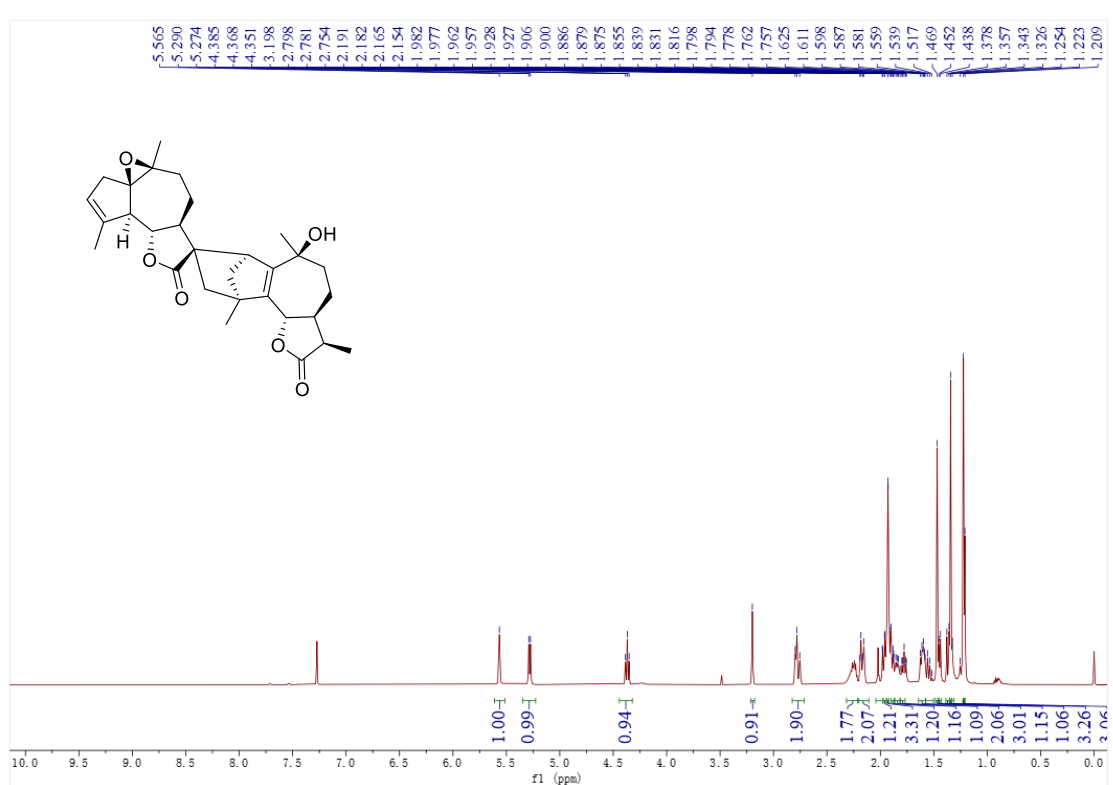

**Figure S11**  $^1\text{H}$  NMR spectrum (600 MHz) of artematrolide B (**2**) in  $\text{CDCl}_3$ .

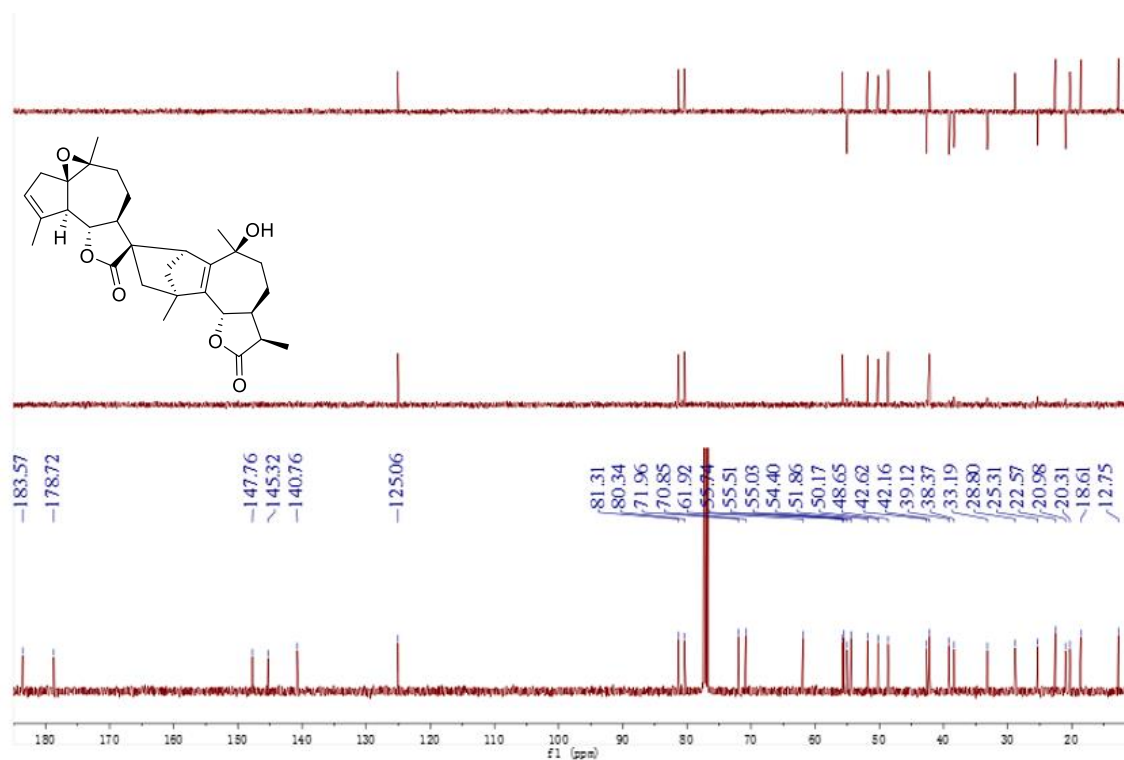

**Figure S12**  $^{13}\text{C}$  NMR spectra (150 MHz) of artematrolide B (**2**) in  $\text{CDCl}_3$ .

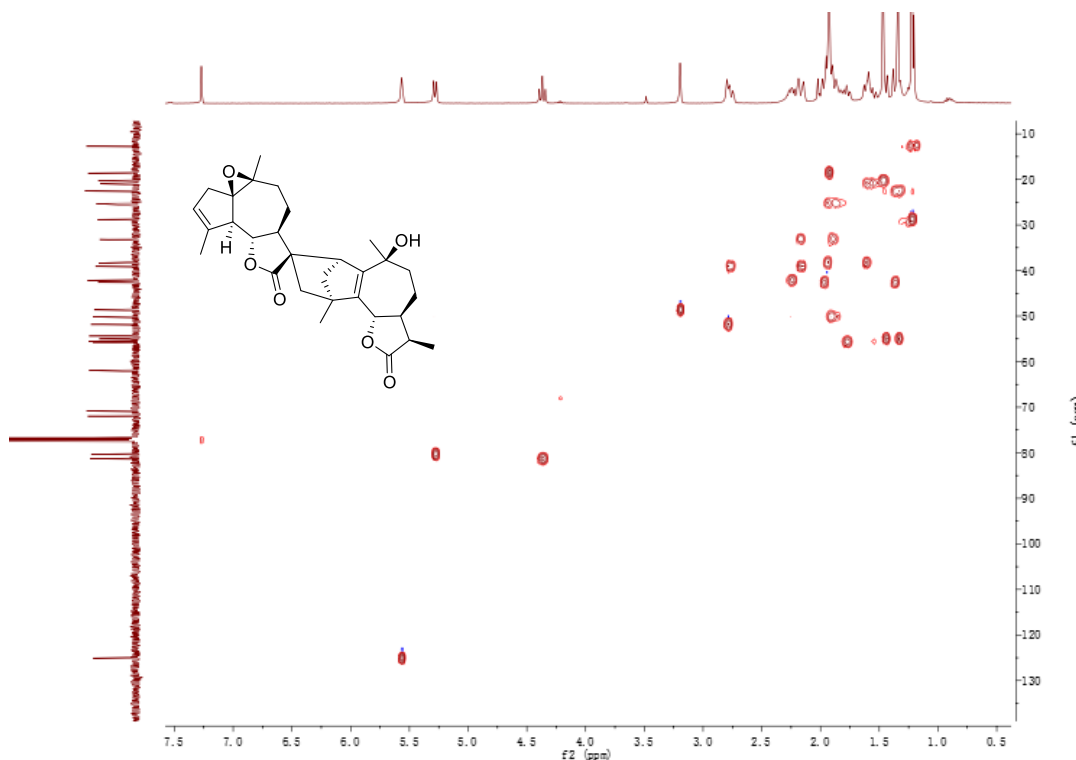

Figure S13 HSQC spectrum (600 MHz) of artematrolide B (**2**) in  $\text{CDCl}_3$ .

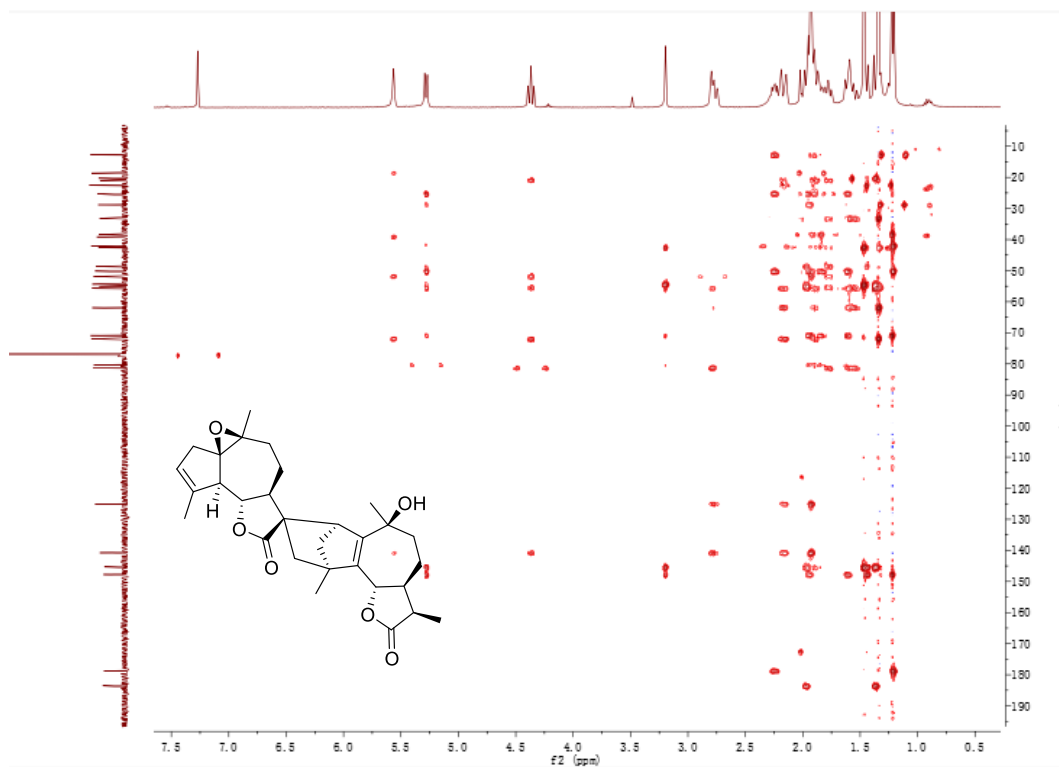

Figure S14 HMBC spectrum (600 MHz) of artematrolide B (**2**) in  $\text{CDCl}_3$ .

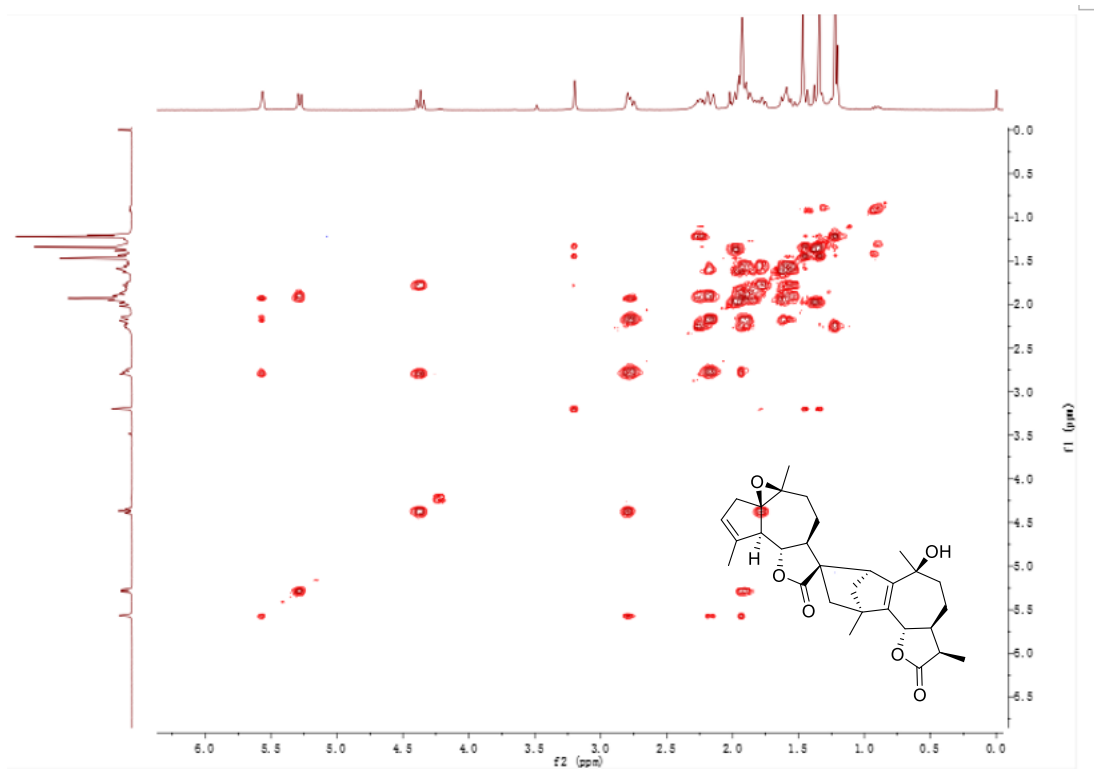

**Figure S15**  $^1\text{H}$ - $^1\text{H}$  COSY spectrum (600 MHz) of artematrolide B (**2**) in  $\text{CDCl}_3$ .

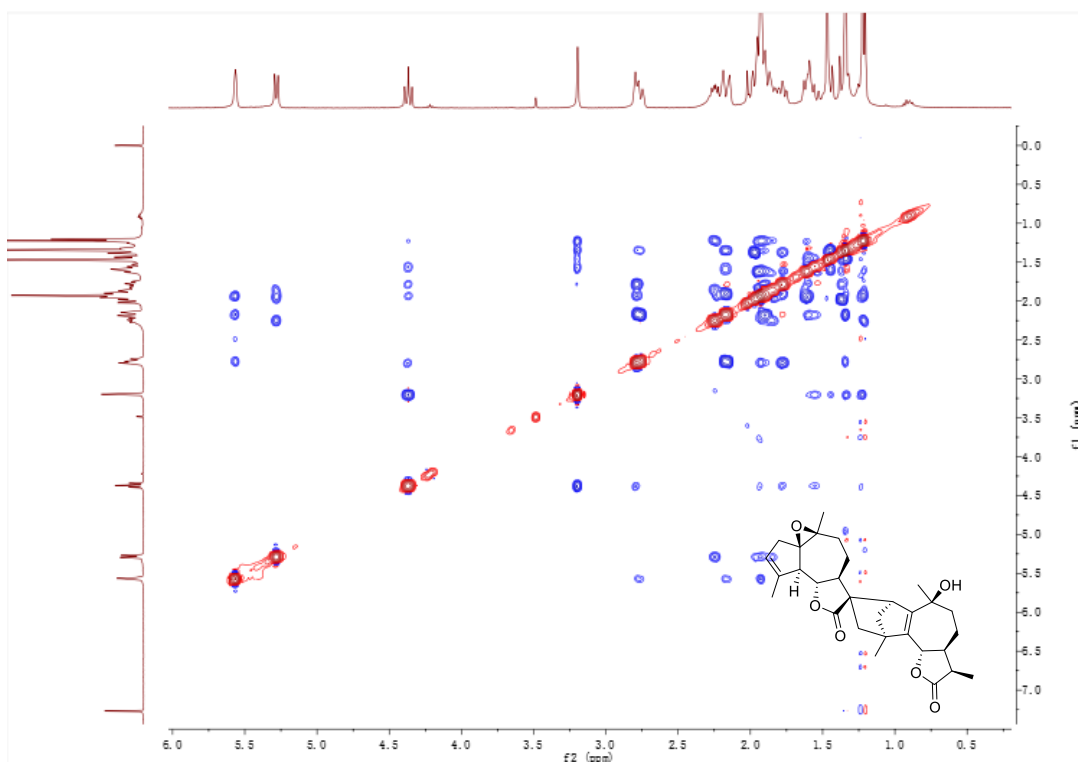

**Figure S16** ROESY spectrum (600 MHz) of artematrolide B (**2**) in  $\text{CDCl}_3$ .

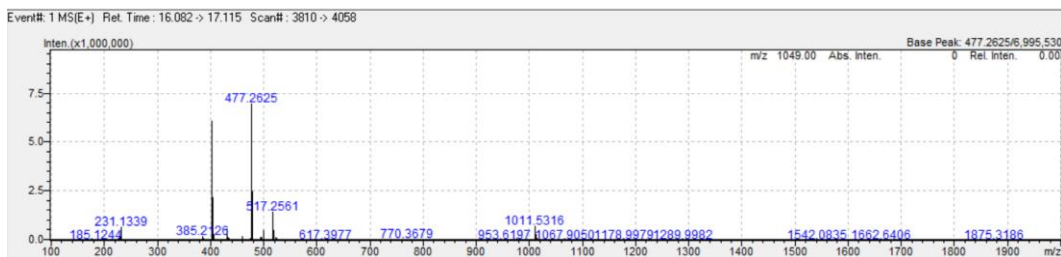

Figure S17 HRESIMS spectrum of artematrolide B (2).

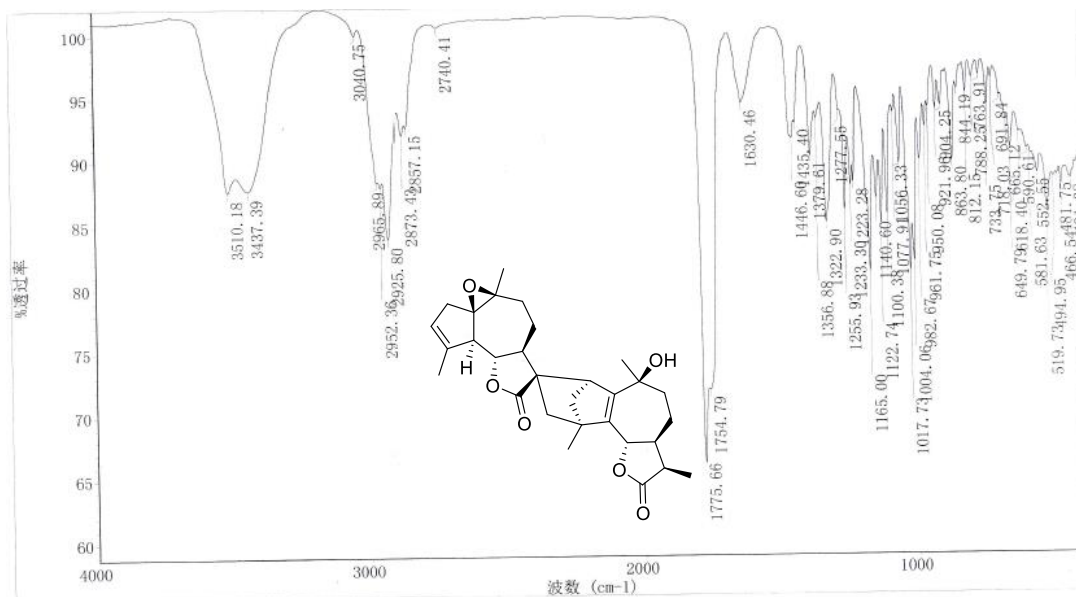

Sample Name: jar86b  
KBr压片  
采集时间: 星期五 1月 10 14:47:00 2020 (GMT+08:00)  
仪器型号: NICOLET iS10  
Software version: OMNIC 9.8.372

样品扫描次数: 16  
背景扫描次数: 16  
分辨率: 4.000  
采样增益: 1.0  
动镜速度: 0.4747  
光阑: 89.00

Figure S18 IR spectrum of artematrolide B (2).

**Rudolph Research Analytical**

This sample was measured on an Autopol VI, Serial #91058  
Manufactured by Rudolph Research Analytical, Hackettstown, NJ, USA.

Measurement Date : Saturday, 04-JAN-2020

Set Temperature : OFF

Time Delay : Disabled

Delay between Measurement : Disabled

| n | Average | Std.Dev. | % RSD | Maximum | Minimum |
|---|---------|----------|-------|---------|---------|
| 5 | 121.76  | 0.55     | 0.45  | 122.20  | 120.80  |

| S.No | Sample ID | Time        | Result | Scale | OR °Arc | WLG.nm | Lg.mm  | Conc.g/100ml | Temp. |
|------|-----------|-------------|--------|-------|---------|--------|--------|--------------|-------|
| 1    | jar86b    | 12:38:31 PM | 122.00 | SR    | 0.0610  | 589    | 100.00 | 0.050        | 21.6  |
| 2    | jar86b    | 12:38:39 PM | 122.20 | SR    | 0.0611  | 589    | 100.00 | 0.050        | 21.6  |
| 3    | jar86b    | 12:38:47 PM | 122.00 | SR    | 0.0610  | 589    | 100.00 | 0.050        | 21.6  |
| 4    | jar86b    | 12:38:56 PM | 121.80 | SR    | 0.0609  | 589    | 100.00 | 0.050        | 21.6  |
| 5    | jar86b    | 12:39:04 PM | 120.80 | SR    | 0.0604  | 589    | 100.00 | 0.050        | 21.6  |

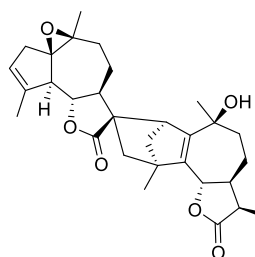

Figure S19 Optical rotation spectrum of artematrolide B (2).

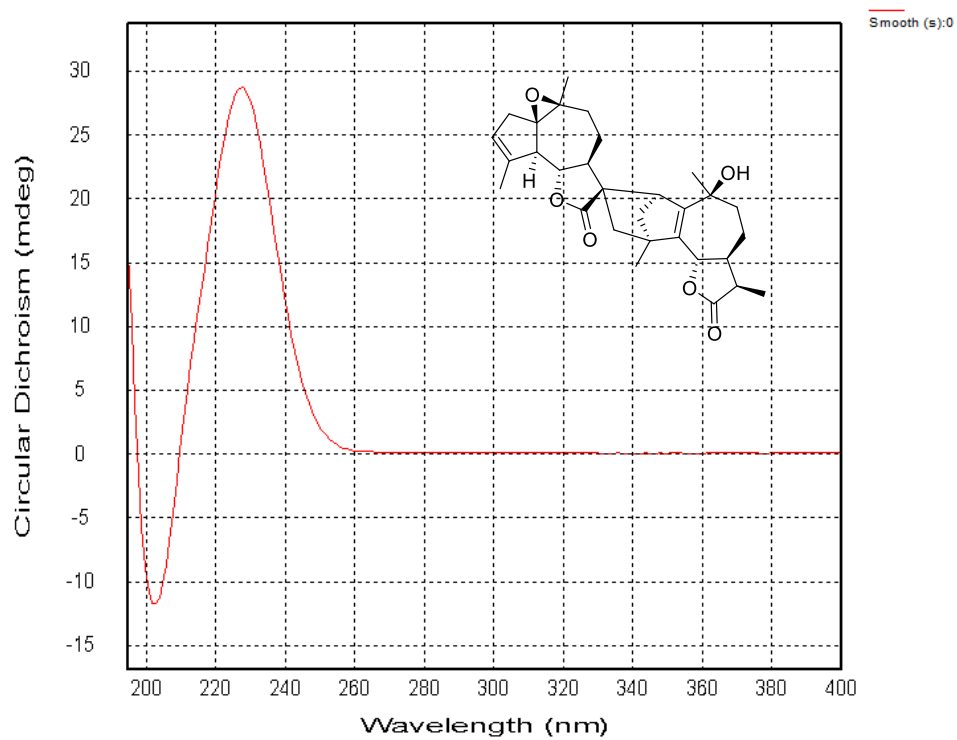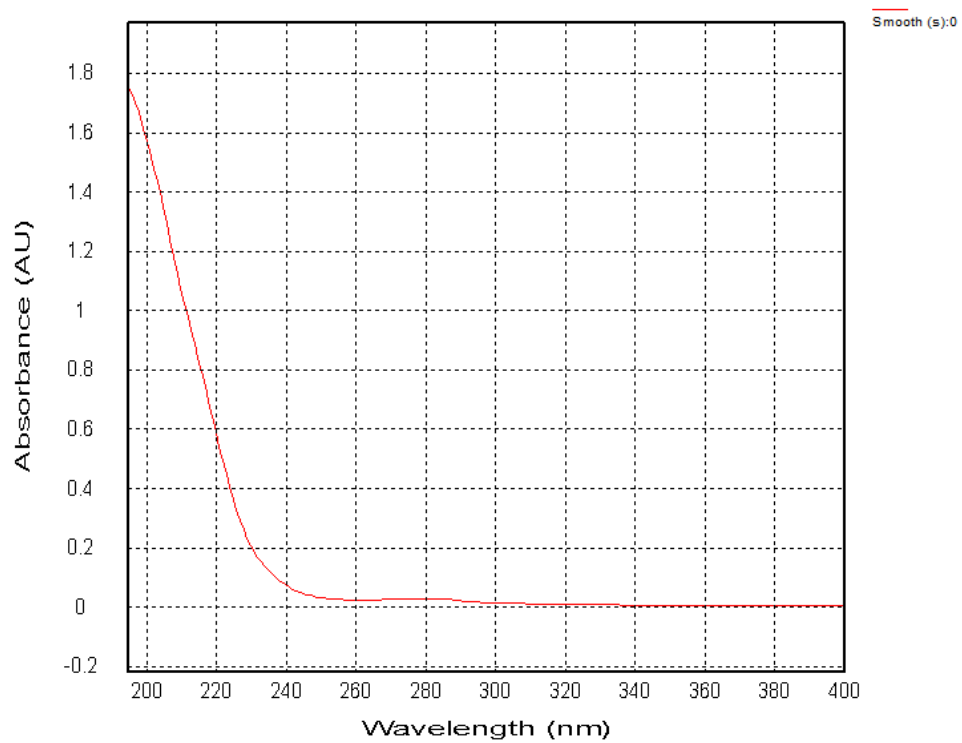

**Figure S20** CD (top) and UV (bottom) spectra of artematrolide B (**2**).

#### 4. NMR, MS, IR, $[\alpha]_D$ and CD spectra of compound 3

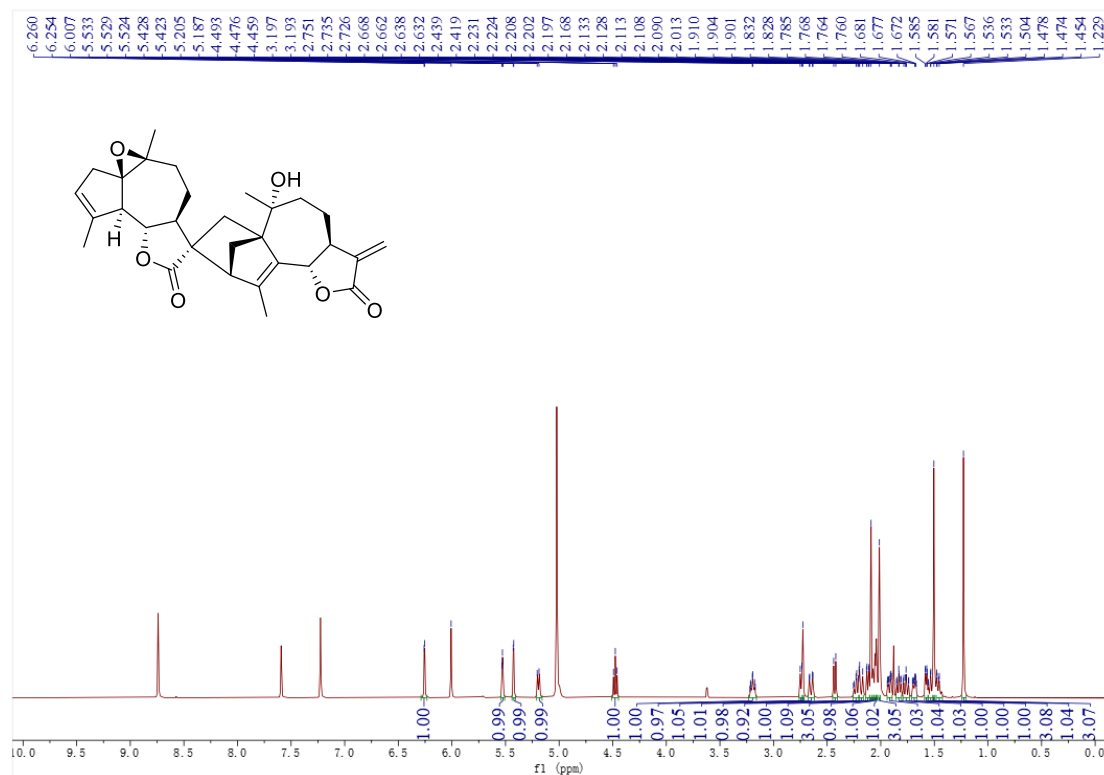

**Figure S21**  $^1\text{H}$  NMR spectrum (600 MHz) of lavandiolid A (**3**) in pyridine- $d_5$ .

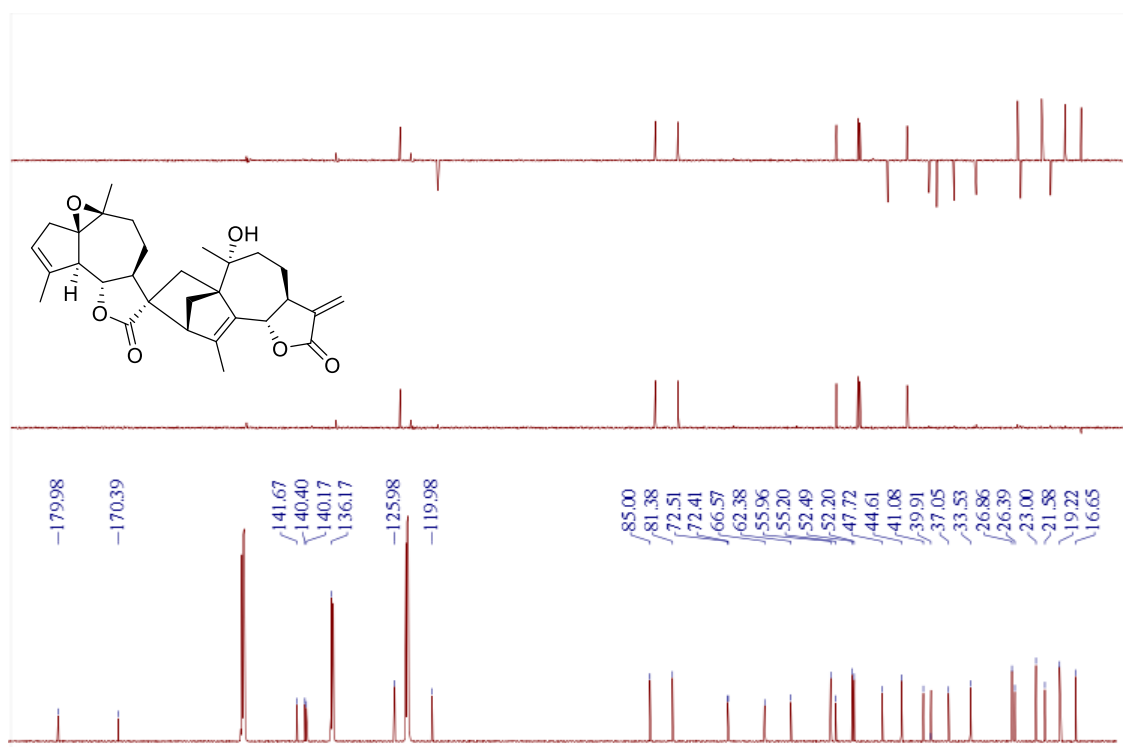

**Figure S22**  $^{13}\text{C}$  NMR spectrum (150 MHz) of lavandiolid A (**3**) in pyridine- $d_5$ .

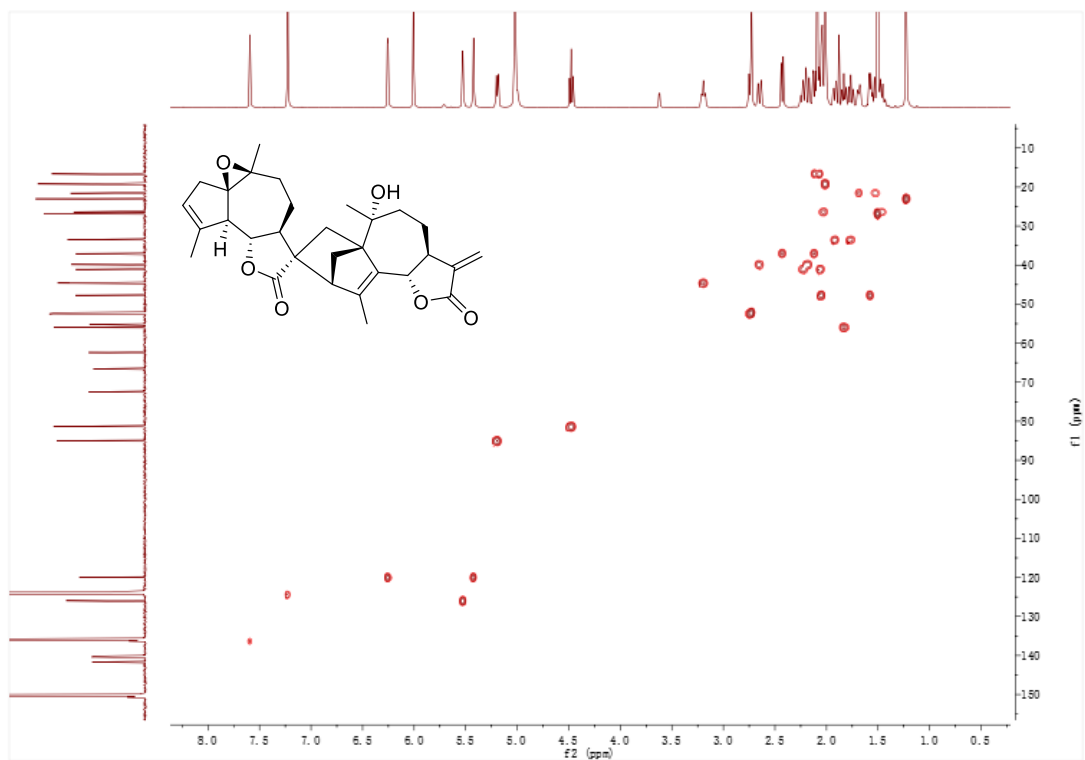

**Figure S23** HSQC spectrum (600 MHz) of lavandiolid A (**3**) in pyridine-*d*<sub>5</sub>.

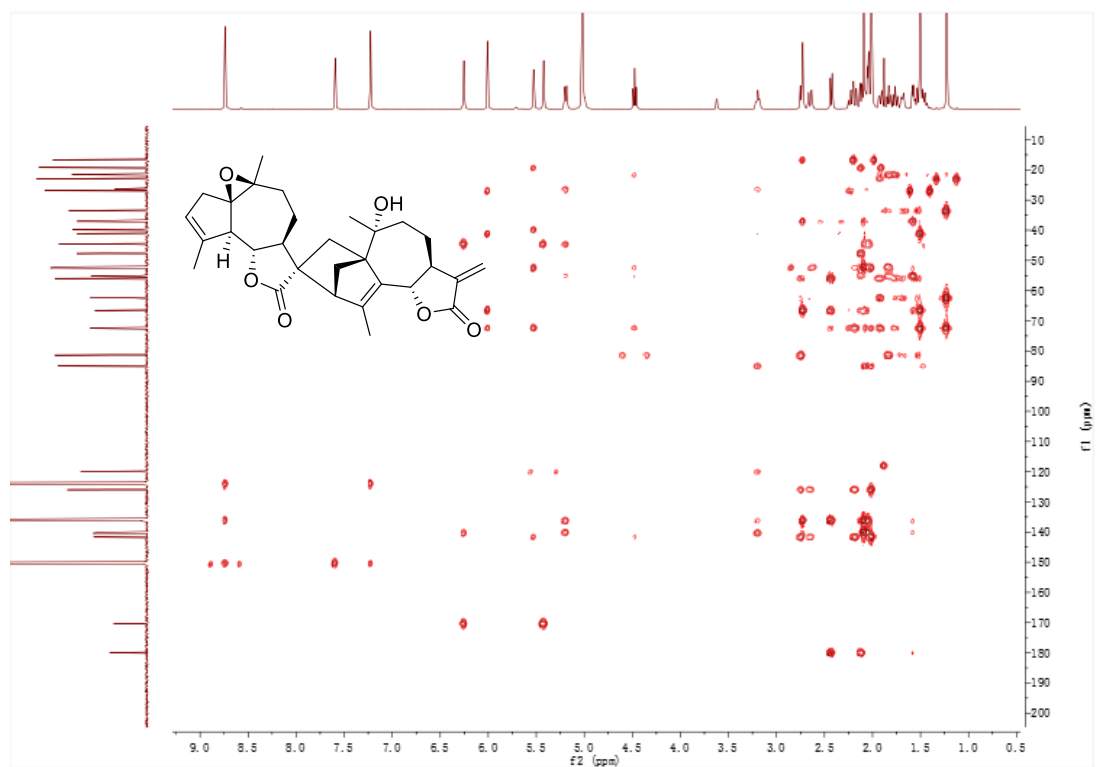

**Figure S24** HMBC spectrum (600 MHz) of lavandiolid A (**3**) in pyridine-*d*<sub>5</sub>.



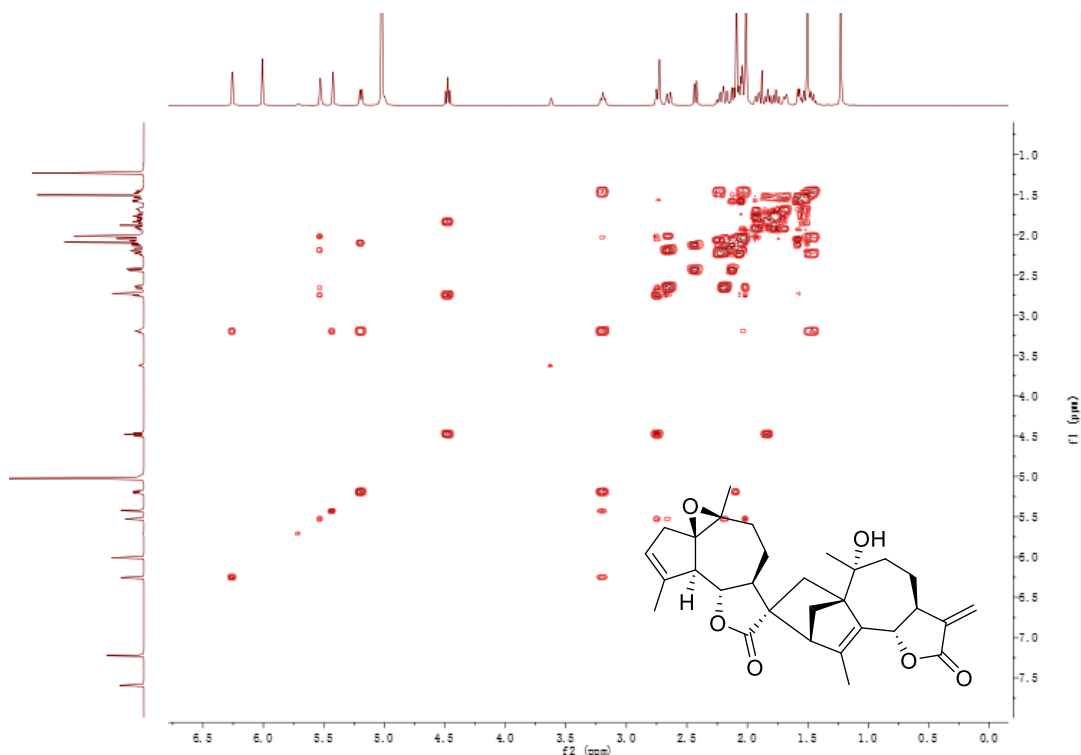

**Figure S25**  $^1\text{H}$ - $^1\text{H}$  COSY spectrum (600 MHz) of lavandiolid A (**3**) in pyridine- $d_5$ .

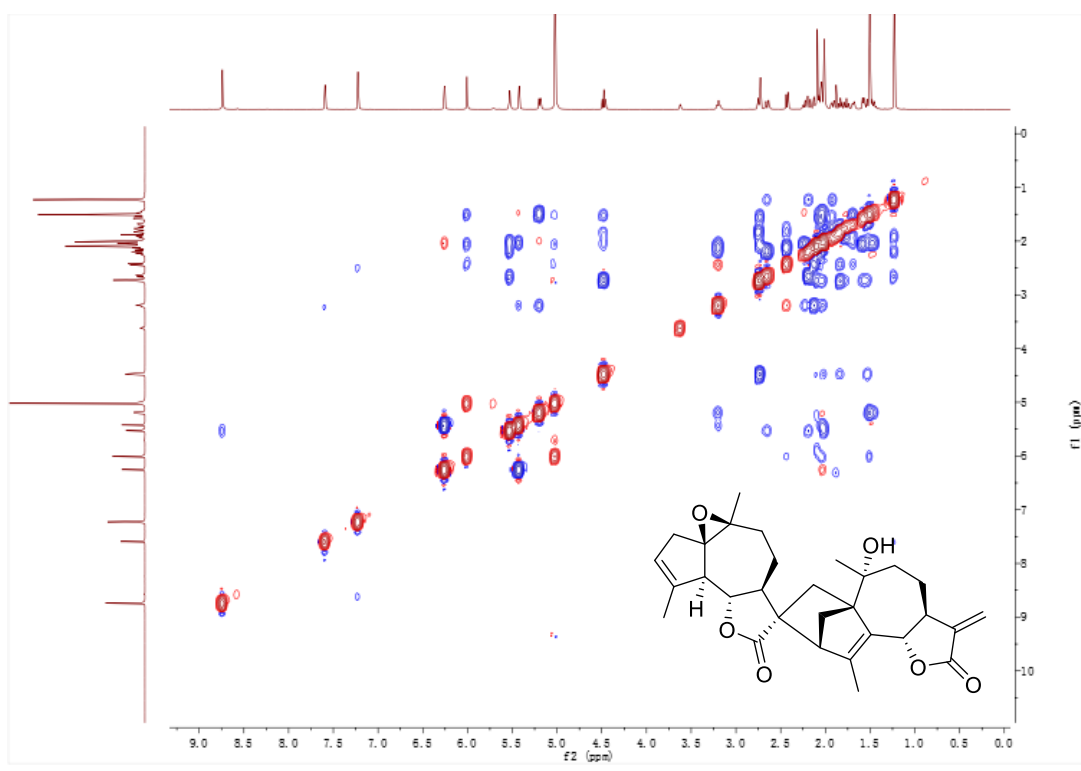

**Figure S26** ROESY spectrum of (600 MHz) lavandiolid A (**3**) in pyridine- $d_5$ .

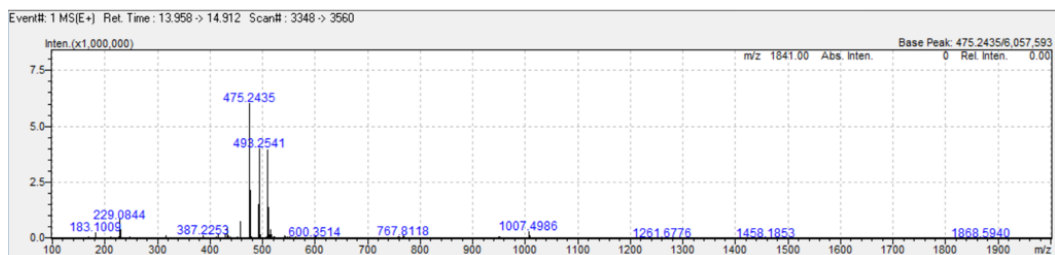

Figure S27 HRESIMS spectrum of lavandiolide A (3).

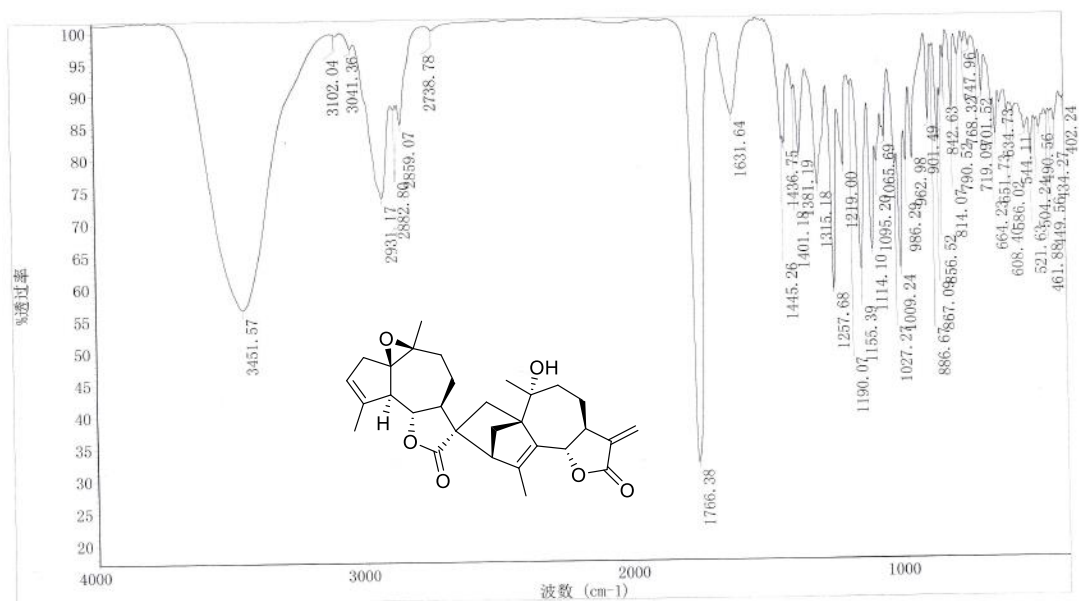

Sample Name: jar139a

KBr压片

采集时间: 星期三 11月 20 11:02:10 2019 (GMT+08:00)

仪器型号: NICOLET iS10

Software version: OMNIC 9.8.372

样品扫描次数: 16

背景扫描次数: 16

分辨率: 4.000

采样增益: 1.0

动镜速度: 0.4747

光阑: 80.00

Figure S28 IR spectrum of lavandiolide A (3).

#### Rudolph Research Analytical

This sample was measured on an Autopol VI, Serial #91058  
Manufactured by Rudolph Research Analytical, Hackettstown, NJ, USA.

Measurement Date : Monday, 07-SEP-2020

Set Temperature : OFF

Time Delay : Disabled

Delay between Measurement : Disabled

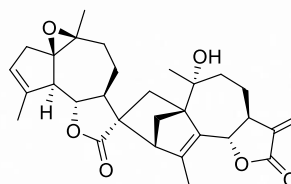

| n | Average | Std.Dev. | % RSD | Maximum | Minimum |
|---|---------|----------|-------|---------|---------|
| 5 | 29.80   | 0.36     | 1.20  | 30.13   | 29.25   |

  

| S.No | Sample ID | Time        | Result | Scale | OR °Arc | WLG.nm | Lq.mm  | Conc.g/100ml | Temp. |
|------|-----------|-------------|--------|-------|---------|--------|--------|--------------|-------|
| 1    | JAR139A   | 05:00:05 PM | 30.13  | SR    | 0.0241  | 589    | 100.00 | 0.080        | 24.9  |
| 2    | JAR139A   | 05:00:13 PM | 30.13  | SR    | 0.0241  | 589    | 100.00 | 0.080        | 24.9  |
| 3    | JAR139A   | 05:00:21 PM | 29.75  | SR    | 0.0238  | 589    | 100.00 | 0.080        | 24.9  |
| 4    | JAR139A   | 05:00:29 PM | 29.75  | SR    | 0.0238  | 589    | 100.00 | 0.080        | 24.9  |
| 5    | JAR139A   | 05:00:37 PM | 29.25  | SR    | 0.0234  | 589    | 100.00 | 0.080        | 25.0  |

Figure S29 Optical rotation spectrum of lavandiolide A (3).

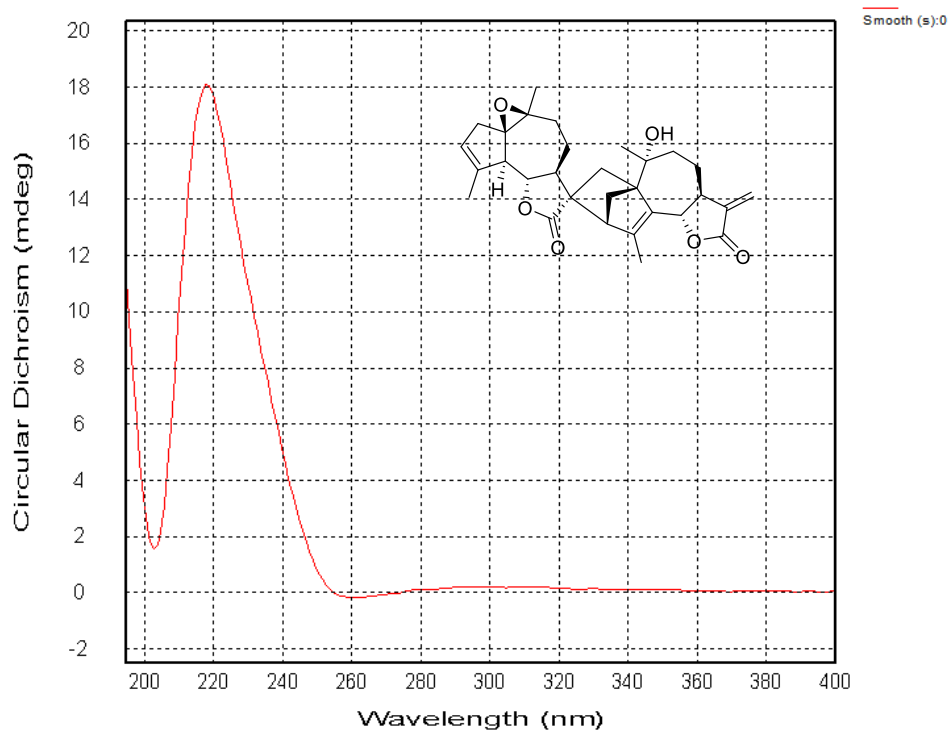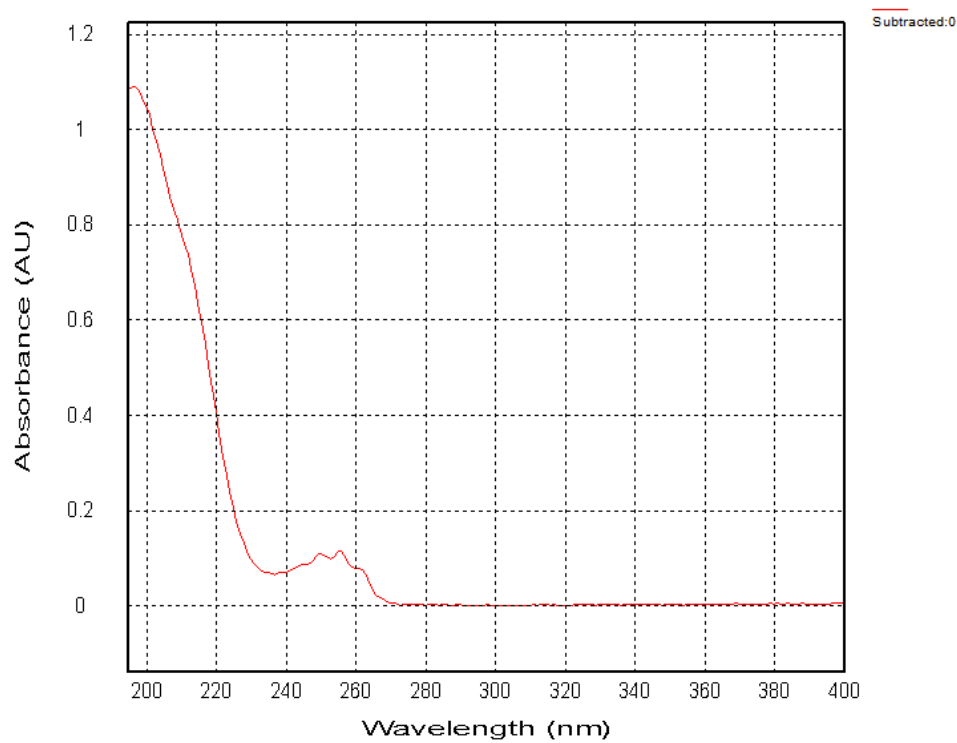

**Figure S30** CD (top) and UV (bottom) spectra of lavandiolide A (**3**).

## 5. NMR, MS, IR, $[\alpha]_D$ and CD spectra of compound 4

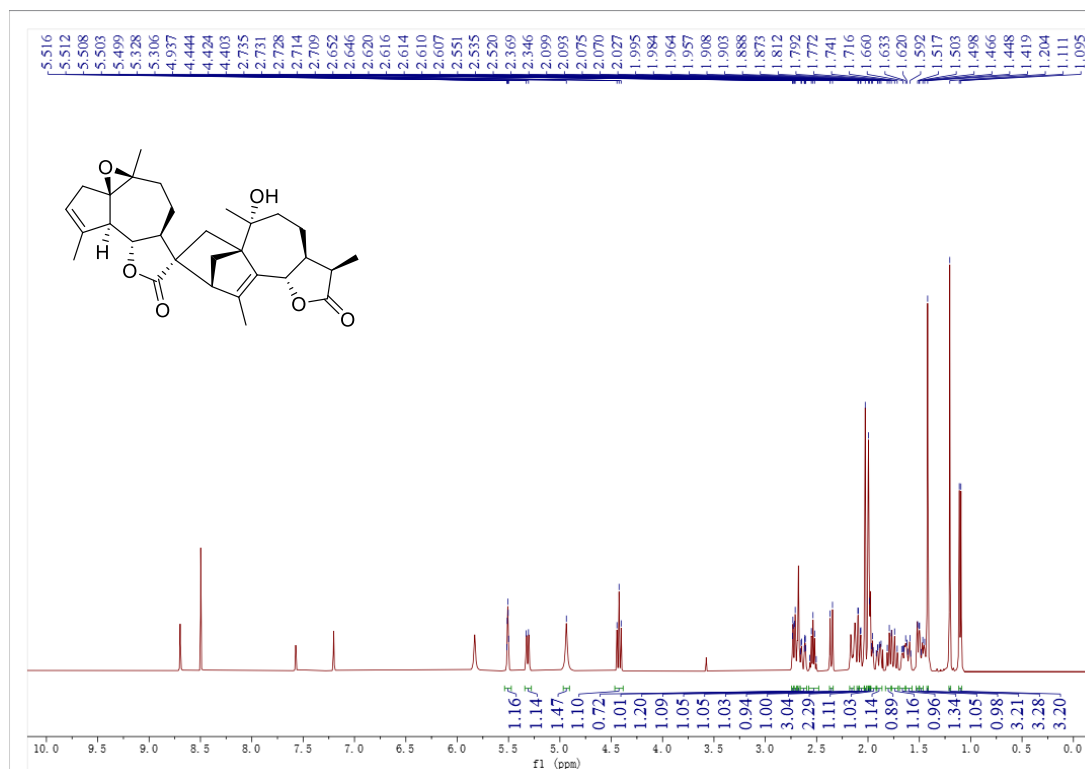

Figure S31  $^1\text{H}$  NMR spectrum (600 MHz) of lavandiolide B (4) in pyridine- $d_5$ .

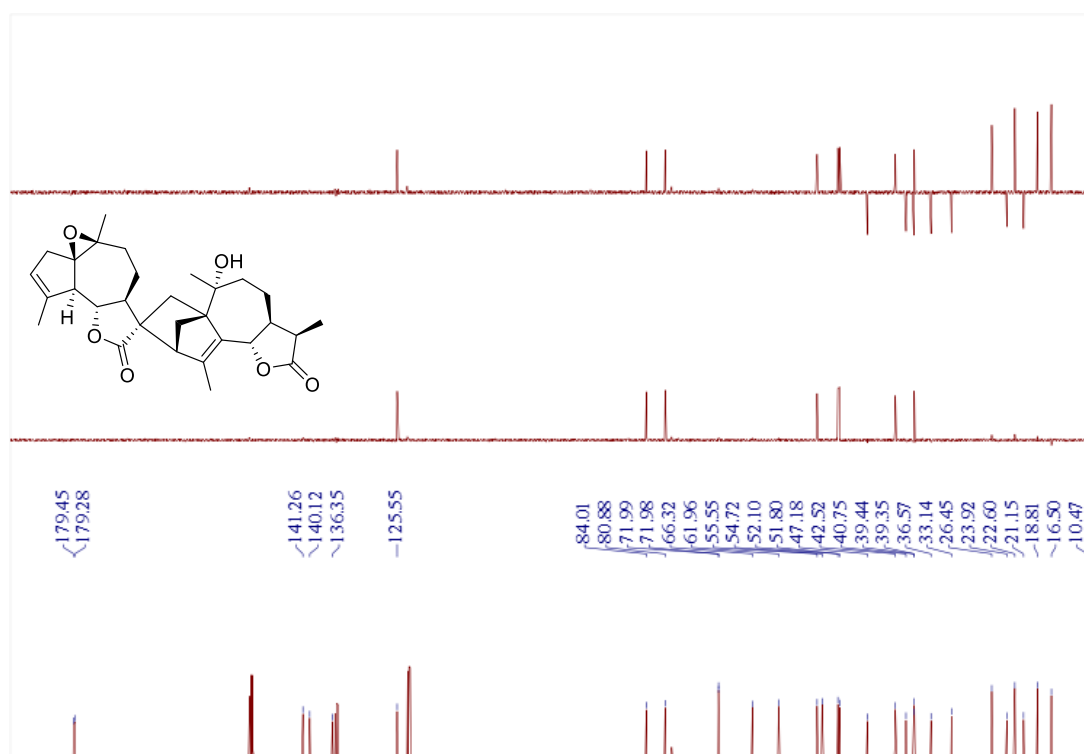

Figure S32  $^{13}\text{C}$  NMR spectrum (150 MHz) of lavandiolide B (4) in pyridine- $d_5$ .

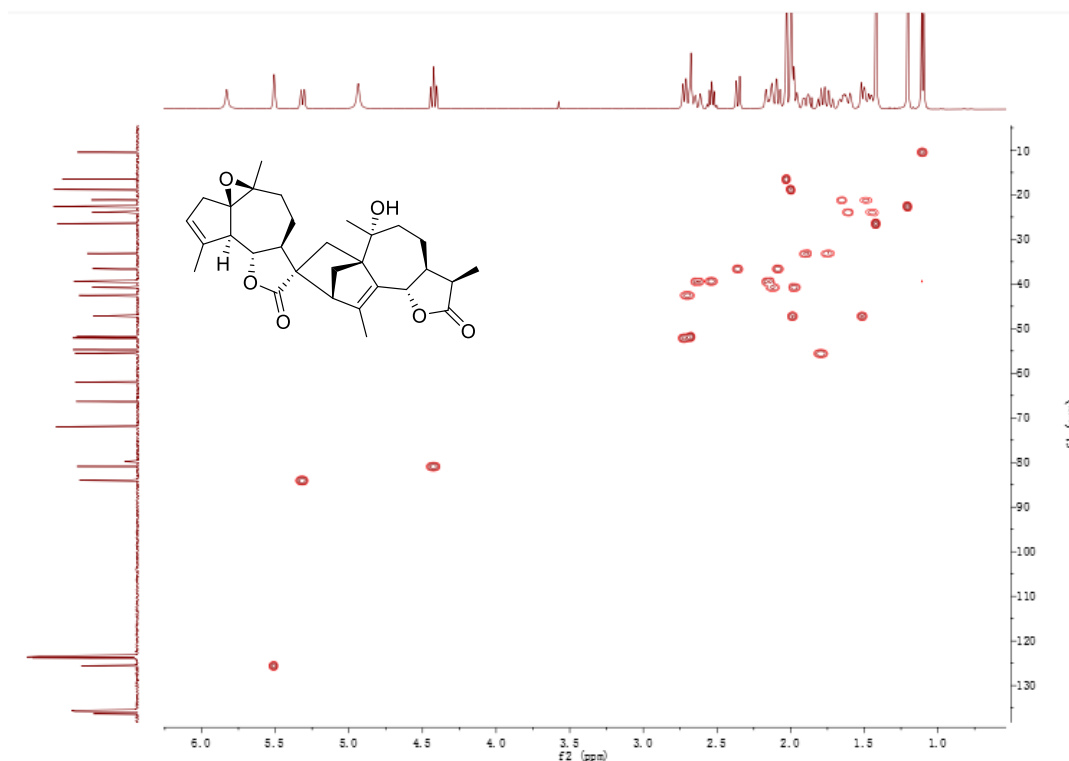

**Figure S33** HSQC spectrum (600 MHz) of lavandiolide B (**4**) in pyridine- $d_5$ .

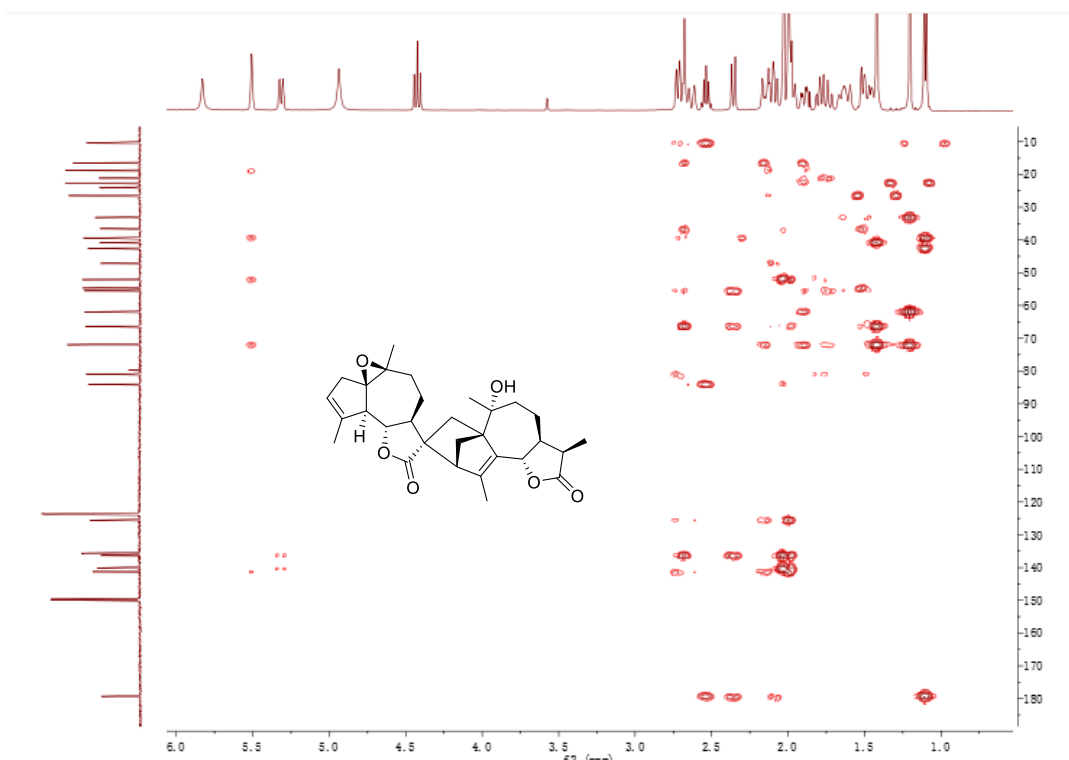

**Figure S34** HMBC spectrum (600 MHz) of lavandiolide B (**4**) in pyridine- $d_5$ .

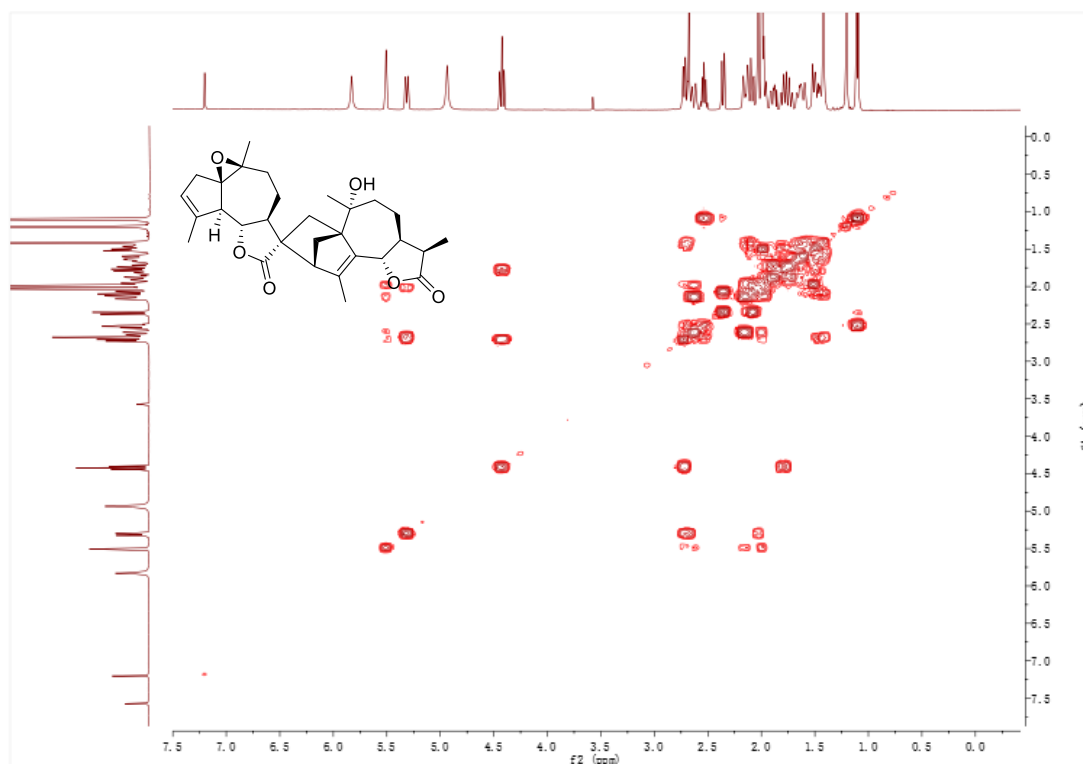

**Figure S35**  $^1\text{H}$ - $^1\text{H}$  COSY spectrum (600 MHz) of lavandiolid B (**4**) in pyridine- $d_5$ .

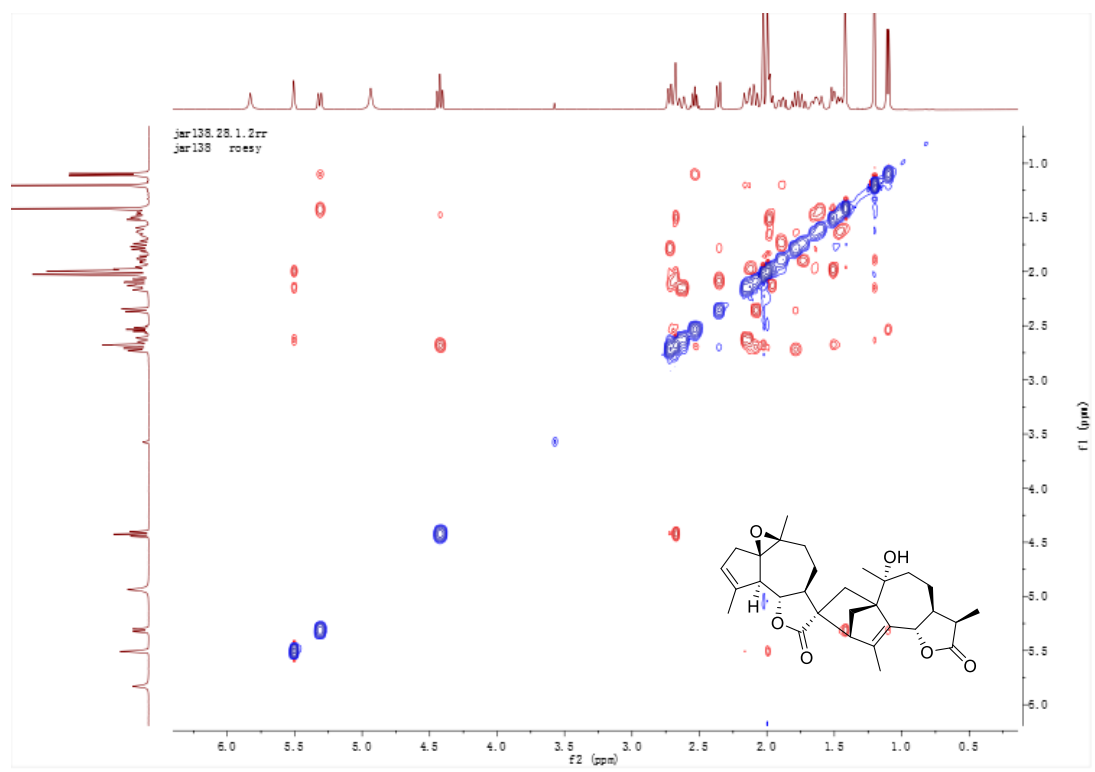

**Figure S36** ROESY spectrum (600 MHz) of lavandiolid B (**4**) in pyridine- $d_5$ .

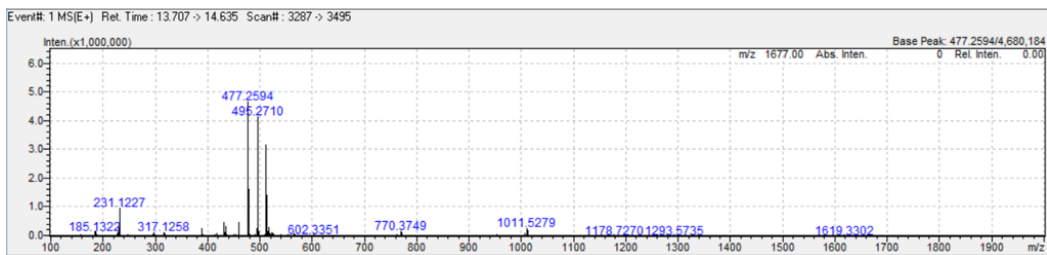

Figure S37 HRESIMS spectrum of lavandiolide B (4).

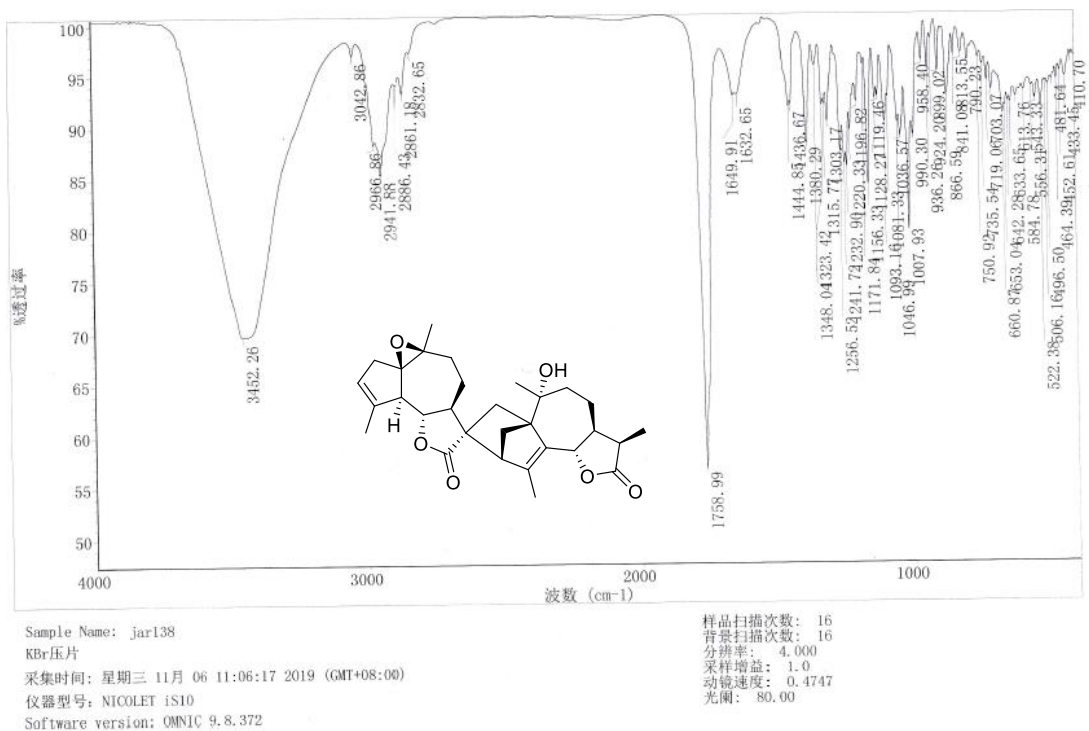

Figure S38 IR spectrum of lavandiolide B (4).

**Rudolph Research Analytical**

This sample was measured on an Autopol VI, Serial #91058  
 Manufactured by Rudolph Research Analytical, Hackettstown, NJ, USA.

Measurement Date : Friday, 13-DEC-2019

Set Temperature : OFF

Time Delay : Disabled

Delay between Measurement : Disabled

| S.No | Sample ID | Time        | Result | Scale | OR °Arc | WLG.nm | Lq.mm  | Conc.g/100ml | Temp. |
|------|-----------|-------------|--------|-------|---------|--------|--------|--------------|-------|
|      |           |             |        |       |         |        |        |              |       |
| 5    |           |             | 203.31 | 1.07  | 0.52    | 204.23 | 201.54 |              |       |
| 1    | jar138    | 04:33:03 PM | 203.85 | SR    | 0.0530  | 589    | 100.00 | 0.026        | 23.3  |
| 2    | jar138    | 04:33:11 PM | 203.85 | SR    | 0.0530  | 589    | 100.00 | 0.026        | 23.3  |
| 3    | jar138    | 04:33:19 PM | 201.54 | SR    | 0.0524  | 589    | 100.00 | 0.026        | 23.3  |
| 4    | jar138    | 04:33:27 PM | 204.23 | SR    | 0.0531  | 589    | 100.00 | 0.026        | 23.3  |
| 5    | jar138    | 04:33:35 PM | 203.08 | SR    | 0.0528  | 589    | 100.00 | 0.026        | 23.3  |

Figure S39 Optical rotation spectrum of lavandiolide B (4).

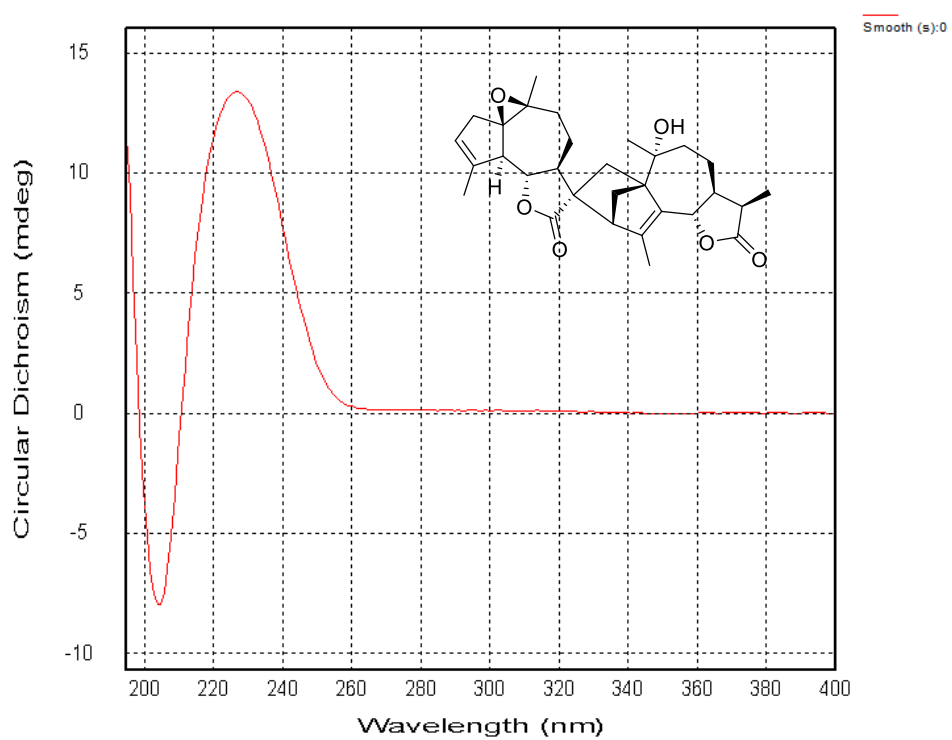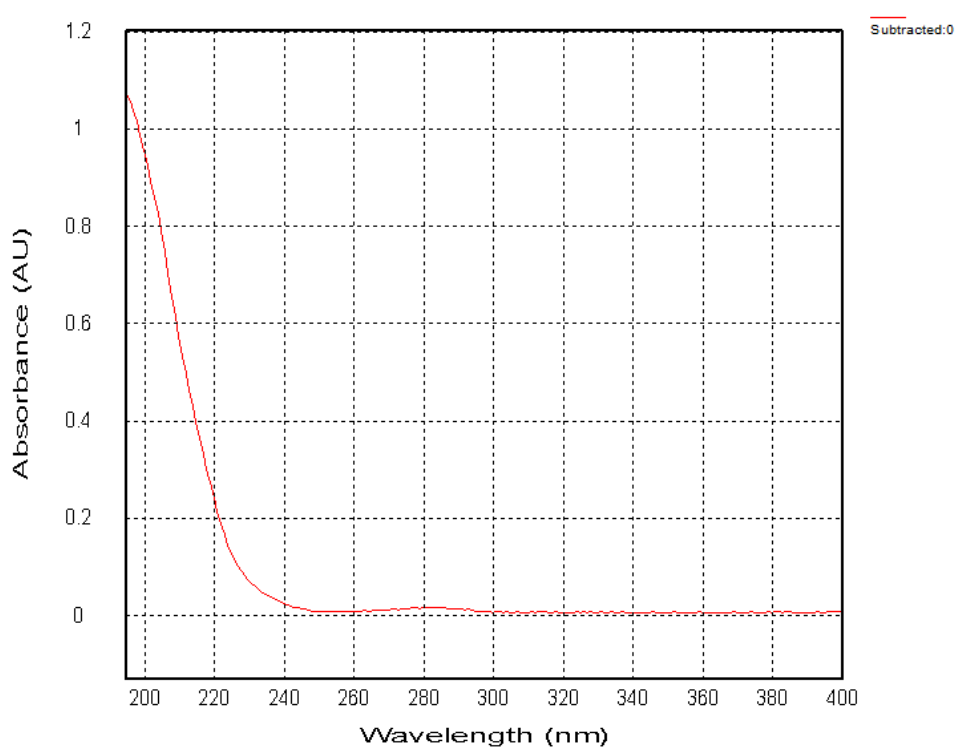

**Figure S40** CD (top) and UV (bottom) spectra of lavandiolide B (4).



## 6. NMR, MS, IR, $[\alpha]_D$ and CD spectra of compound 5

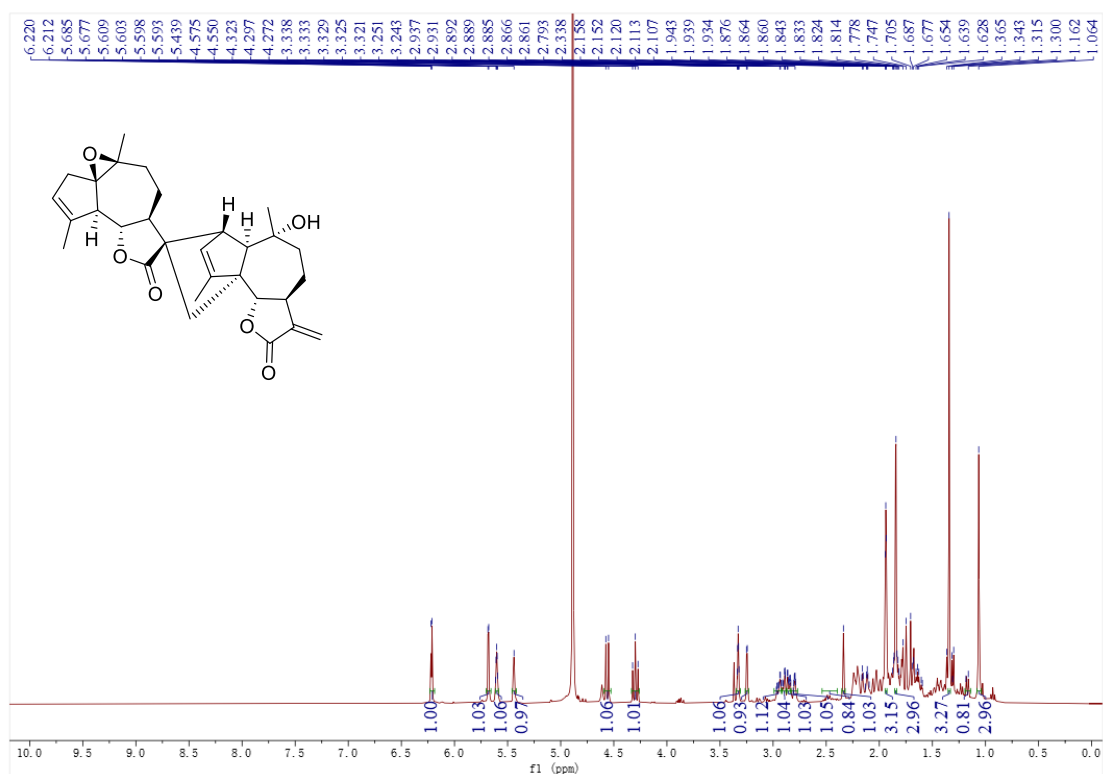

**Figure S41**  $^1\text{H}$  NMR spectrum (400 MHz) of artematrolide C (**5**) in  $\text{CD}_3\text{OD}$ .

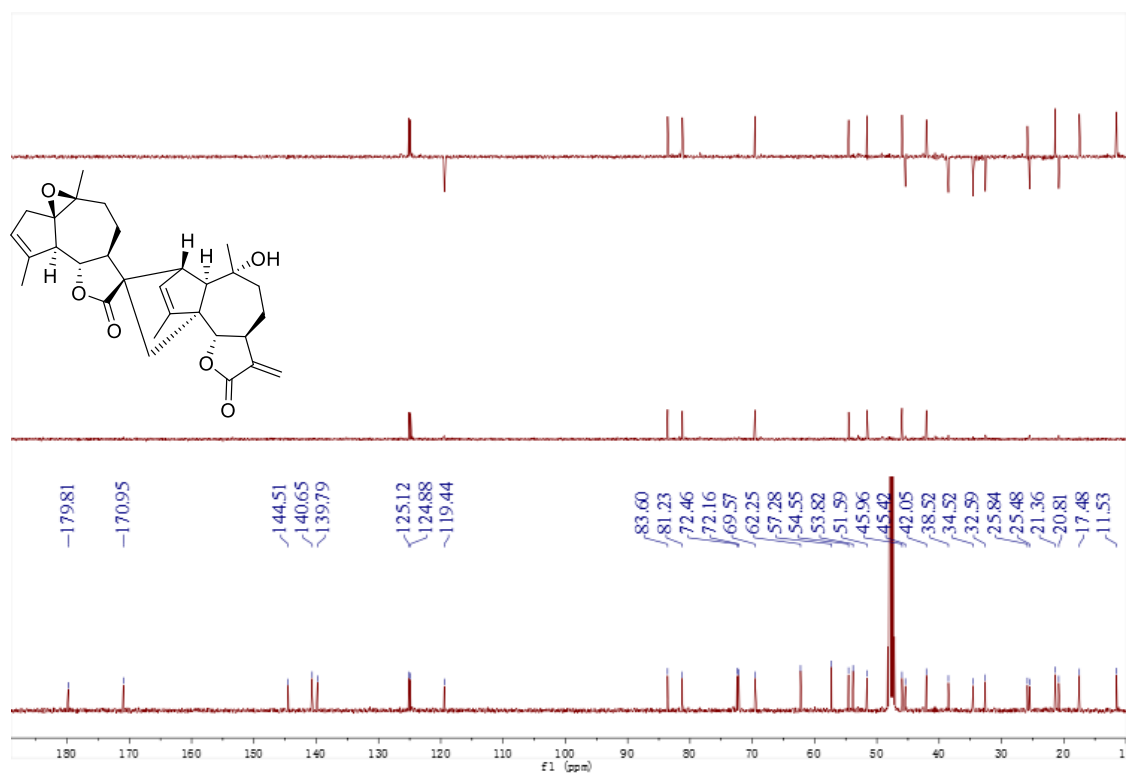

**Figure S42**  $^{13}\text{C}$  NMR spectrum (100 MHz) of artematrolide C (**5**) in  $\text{CD}_3\text{OD}$ .

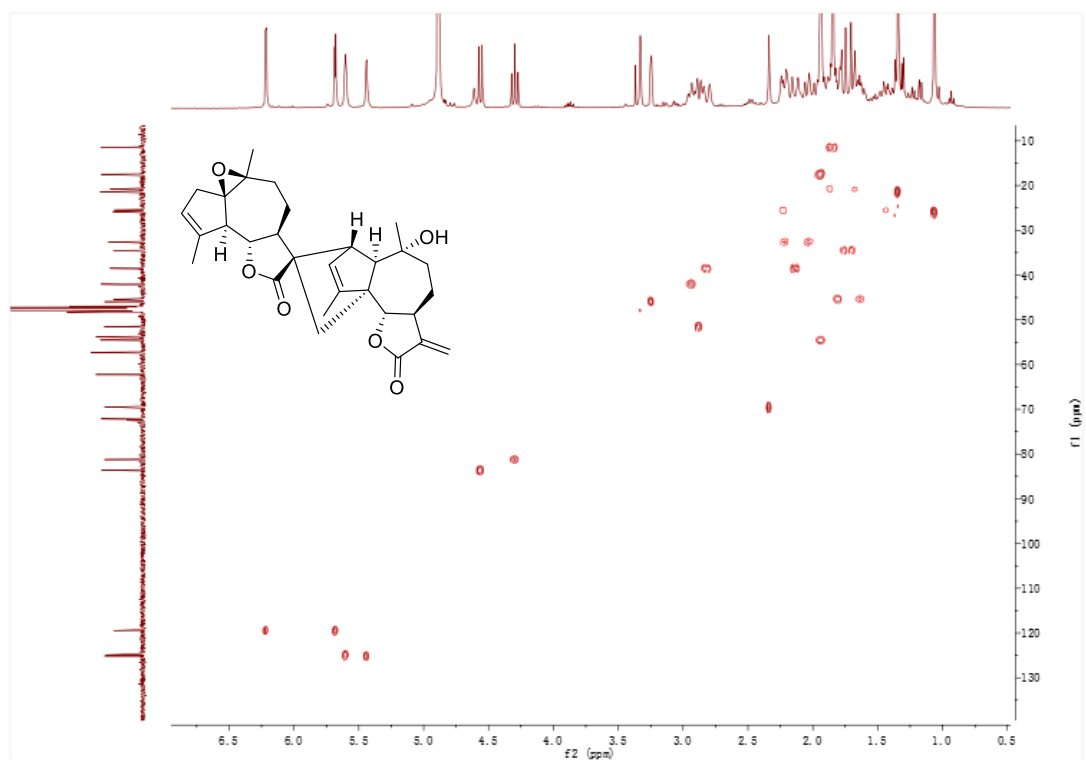

**Figure S43** HSQC spectrum (600 MHz) of artematrolide C (**5**) in CD<sub>3</sub>OD.

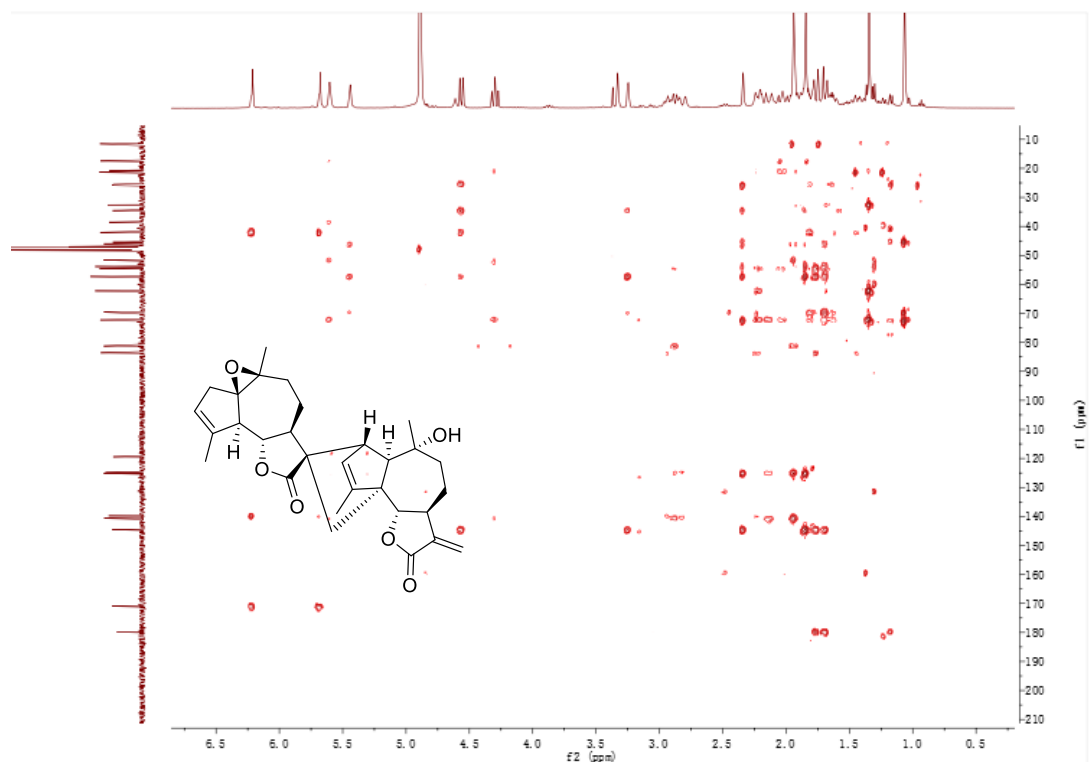

**Figure S44** HMBC spectrum (600 MHz) of artematrolide C (**5**) in CD<sub>3</sub>OD.

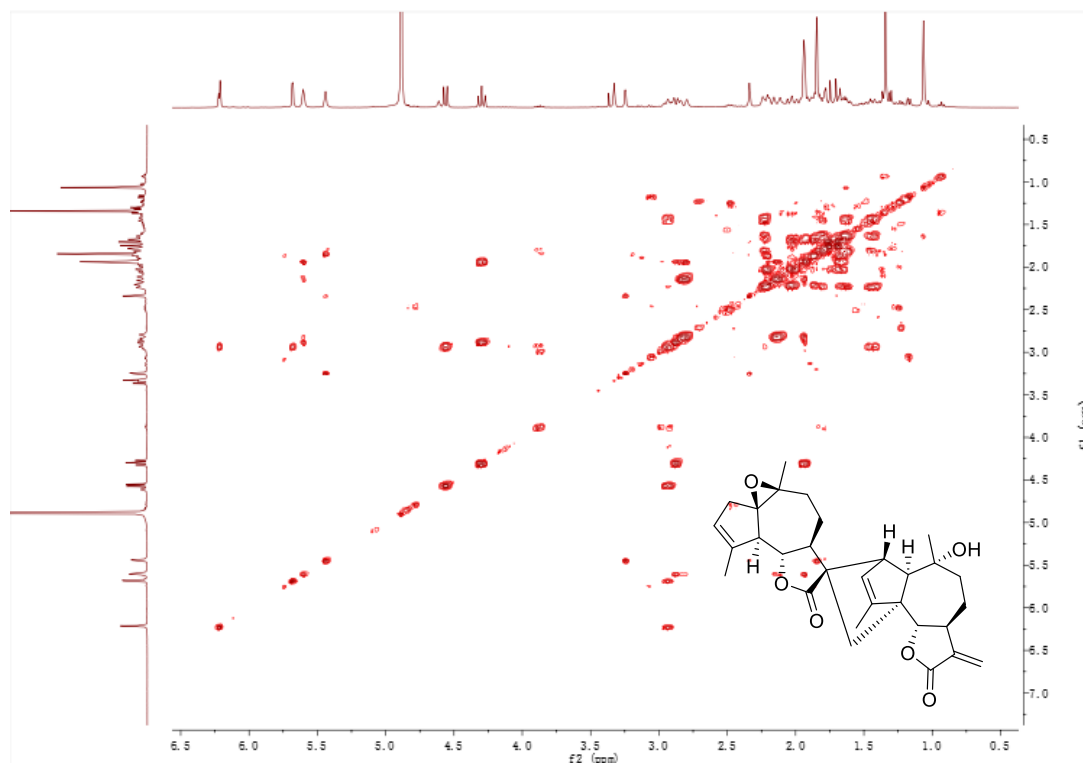

**Figure S45**  $^1\text{H}$ - $^1\text{H}$  COSY spectrum (600 MHz) of artematrolide C (**5**) in  $\text{CD}_3\text{OD}$ .

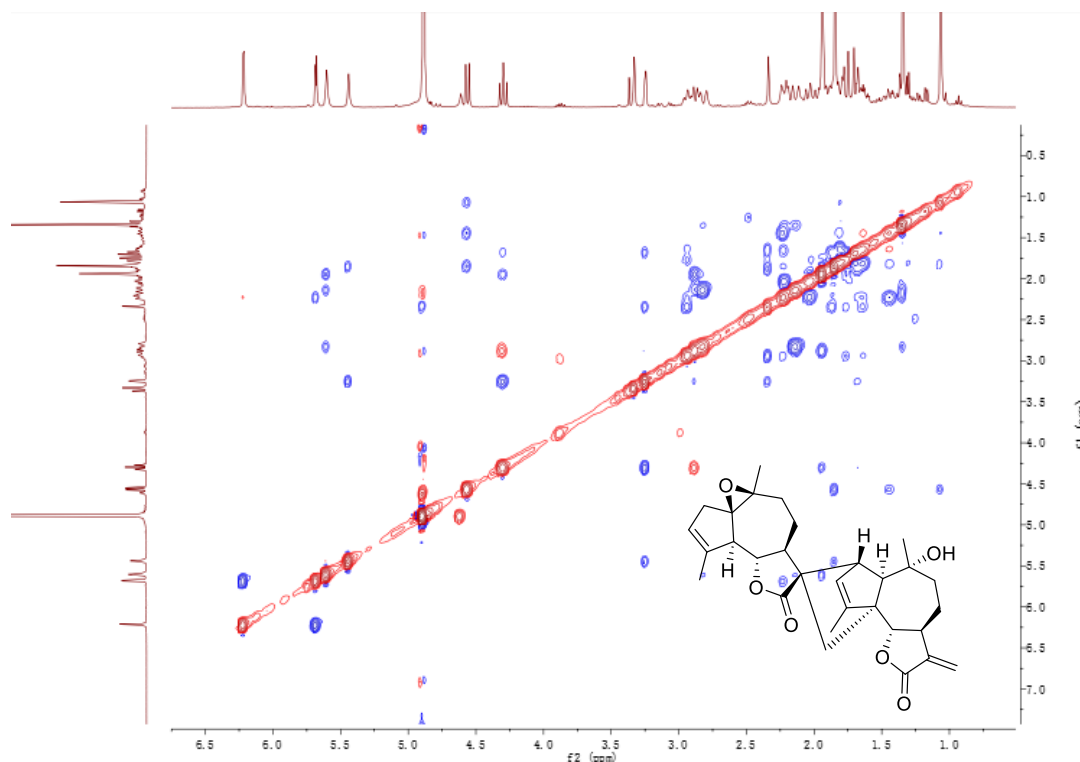

**Figure S46** ROESY spectrum (600 MHz) of artematrolide C (**5**) in  $\text{CD}_3\text{OD}$ .

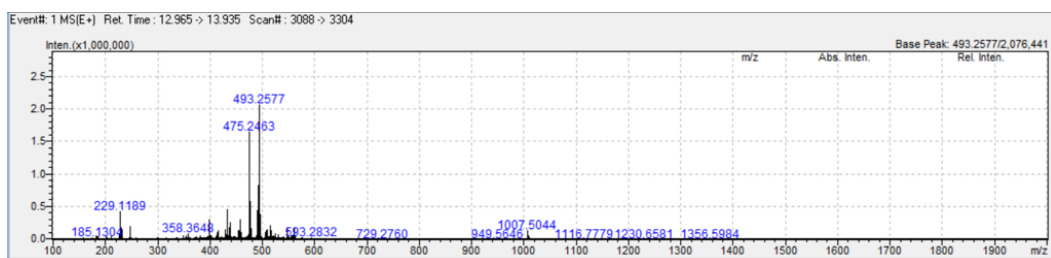

Figure S47 HRESIMS spectrum of artematrolide C (5).

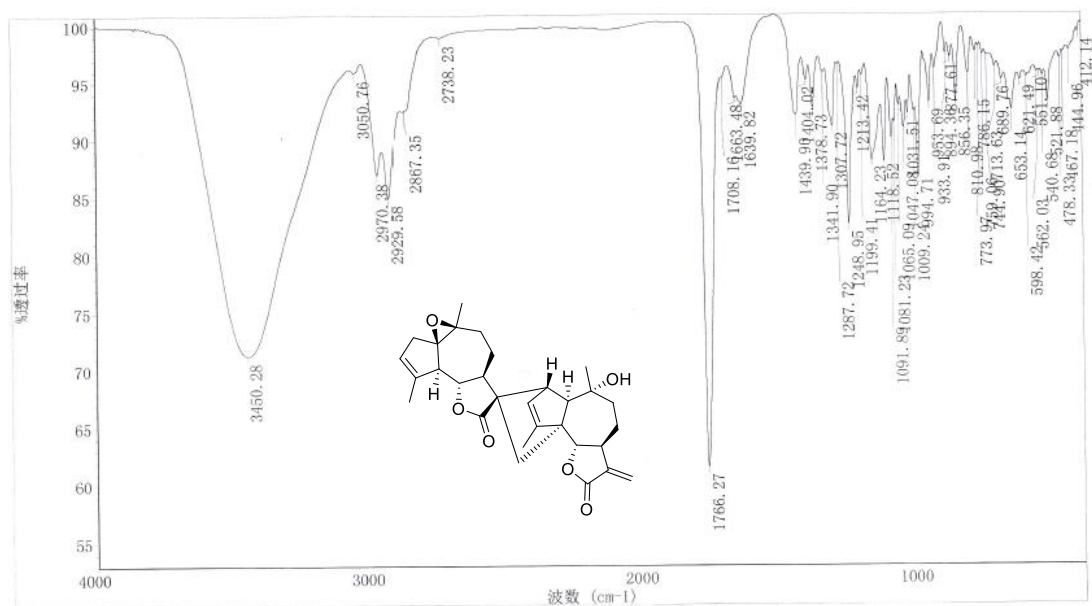

Sample Name: jar145  
KBr压片

采集时间: 星期三 12月 18 16:35:13 2019 (GMT+08:00)

仪器型号: NICOLET iS10

Software version: QMNIC 9.8.372

样品扫描次数: 16  
背景扫描次数: 16  
分辨率: 4.000  
采样增益: 1.0  
动镜速度: 0.4747  
光阑: 80.00

Figure S48 IR spectrum of artematrolide C (5).

#### Rudolph Research Analytical

This sample was measured on an Autopol VI, Serial #91058  
Manufactured by Rudolph Research Analytical, Hackettstown, NJ, USA.

Measurement Date : Friday, 13-DEC-2019

Set Temperature : OFF

Time Delay : Disabled

Delay between Measurement : Disabled

| n | Average | Std.Dev. | % RSD | Maximum | Minimum |
|---|---------|----------|-------|---------|---------|
| 5 | 54.98   | 0.12     | 0.21  | 55.11   | 54.89   |

| S.No | Sample ID | Time        | Result | Scale | OR °Arc | WL.G.nm | Lq.mm  | Conc.g/100ml | Temp. |
|------|-----------|-------------|--------|-------|---------|---------|--------|--------------|-------|
| 1    | jar145    | 05:06:37 PM | 54.89  | SR    | 0.0247  | 589     | 100.00 | 0.045        | 23.5  |
| 2    | jar145    | 05:06:45 PM | 54.89  | SR    | 0.0247  | 589     | 100.00 | 0.045        | 23.5  |
| 3    | jar145    | 05:06:53 PM | 54.89  | SR    | 0.0247  | 589     | 100.00 | 0.045        | 23.4  |
| 4    | jar145    | 05:07:01 PM | 55.11  | SR    | 0.0248  | 589     | 100.00 | 0.045        | 23.4  |
| 5    | jar145    | 05:07:09 PM | 55.11  | SR    | 0.0248  | 589     | 100.00 | 0.045        | 23.4  |

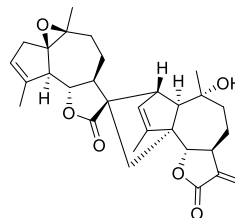

Figure S49 Optical rotation spectrum of artematrolide C (5).

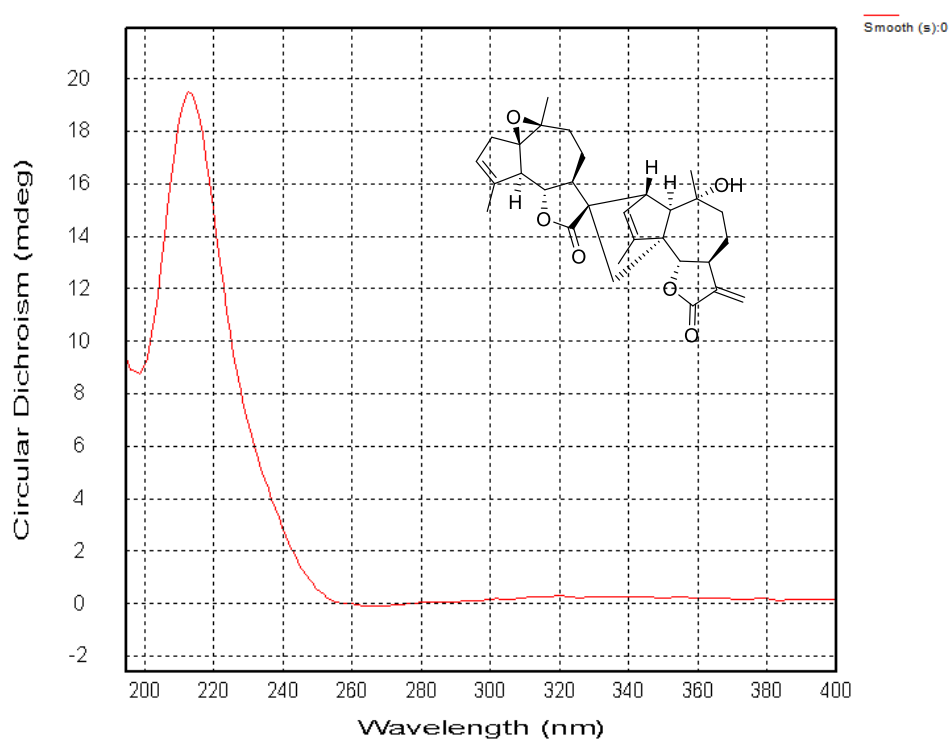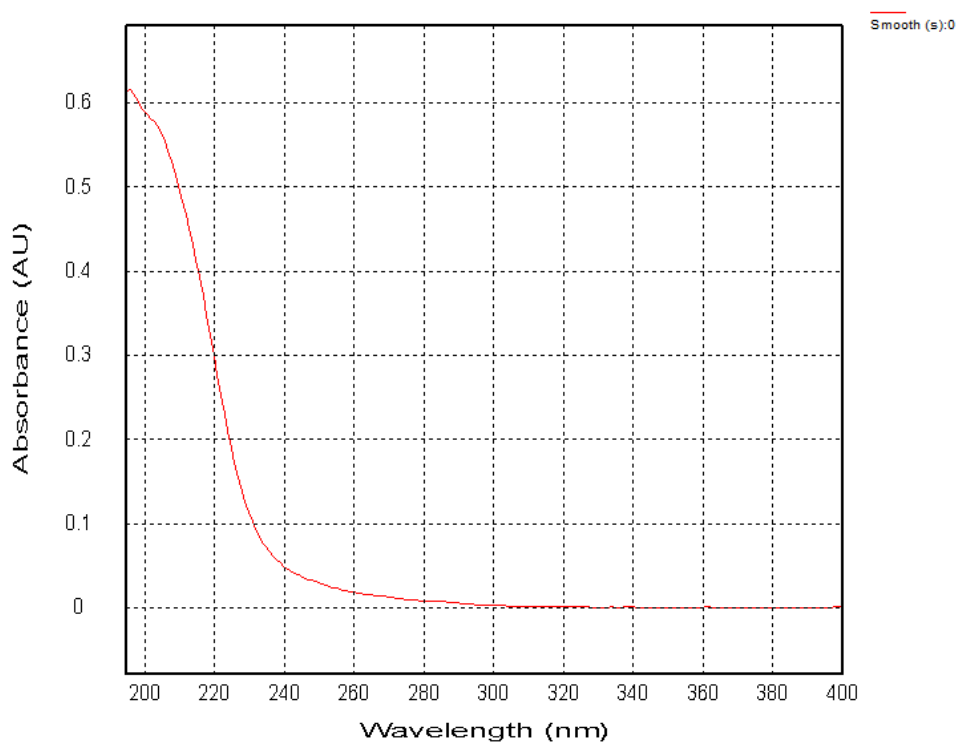

**Figure S50** CD (top) and UV (bottom) spectra of artematrolide C (**5**).

## 7. NMR, MS, IR, $[\alpha]_D$ and CD spectra of compound 6

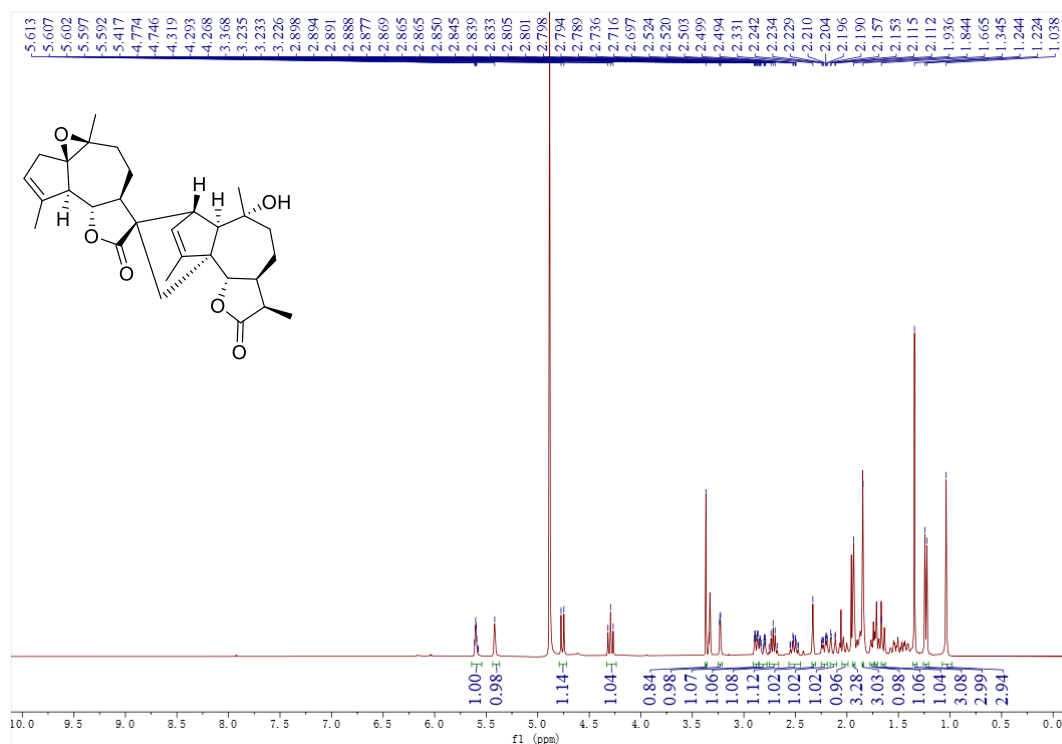

**Figure S51**  $^1\text{H}$  NMR spectrum (400 MHz) of artematrolide D (**6**) in  $\text{CD}_3\text{OD}$ .

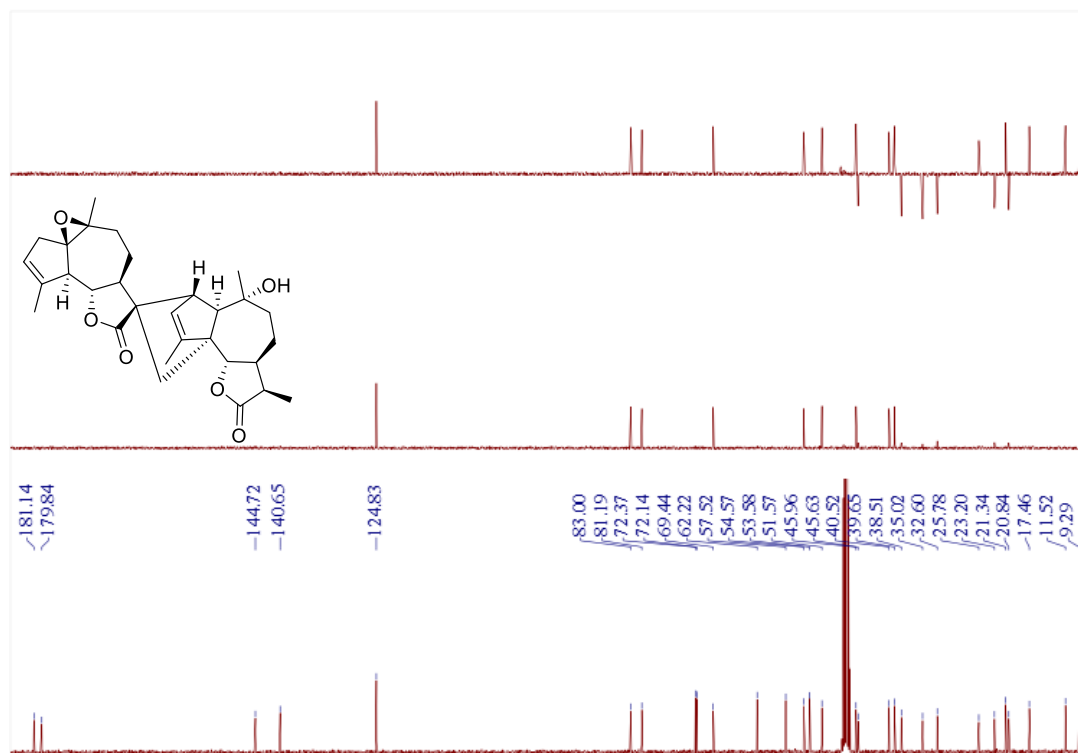

**Figure S52**  $^{13}\text{C}$  NMR spectrum (100 MHz) of artematrolide D (**6**) in  $\text{CD}_3\text{OD}$ .

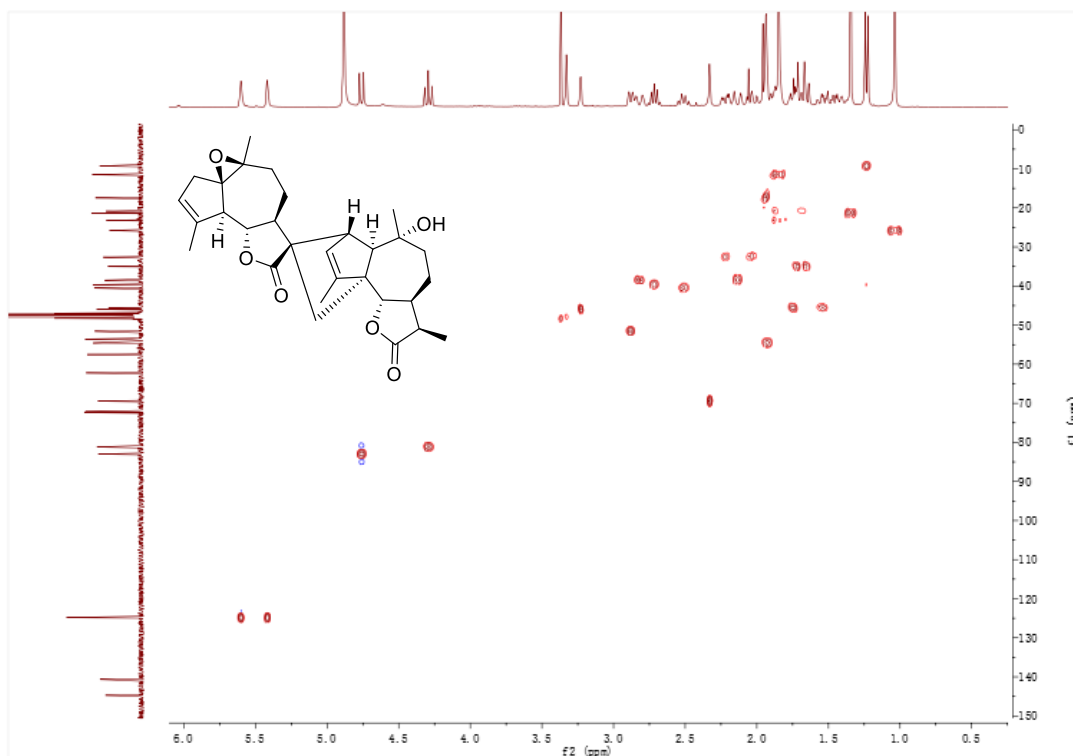

**Figure S53** HSQC spectrum (600 MHz) of artematrolide D (**6**) in CD<sub>3</sub>OD.

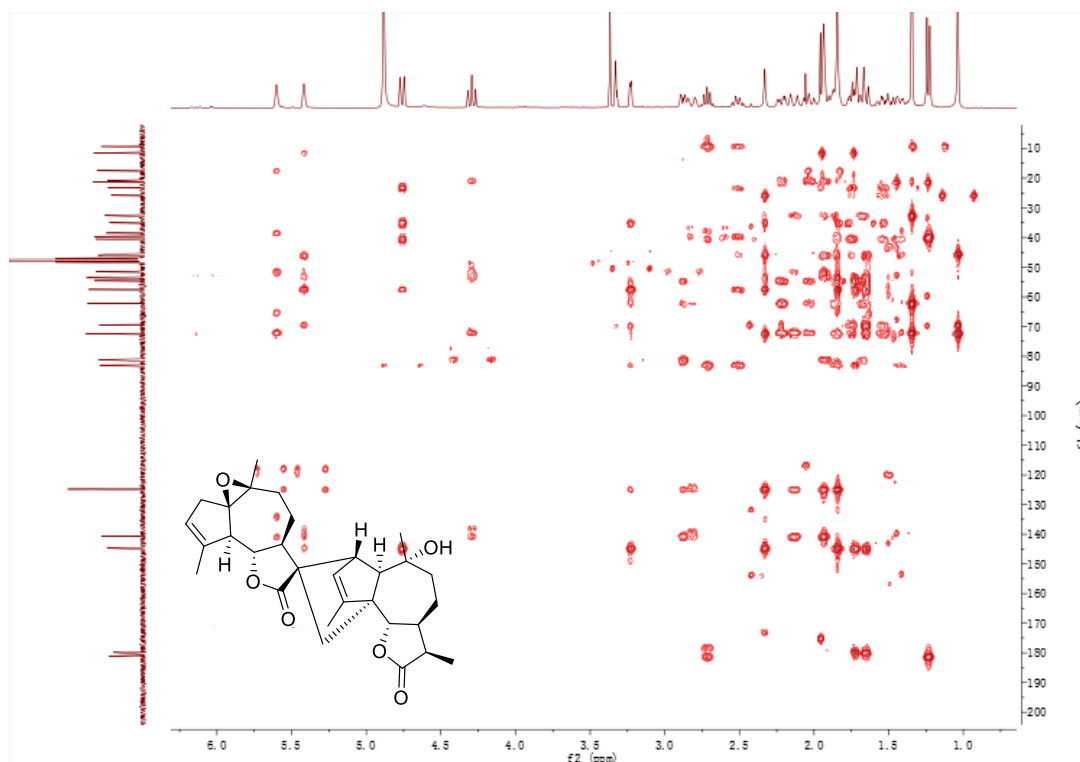

**Figure S54** HMBC spectrum (600 MHz) of artematrolide D (**6**) in CD<sub>3</sub>OD.

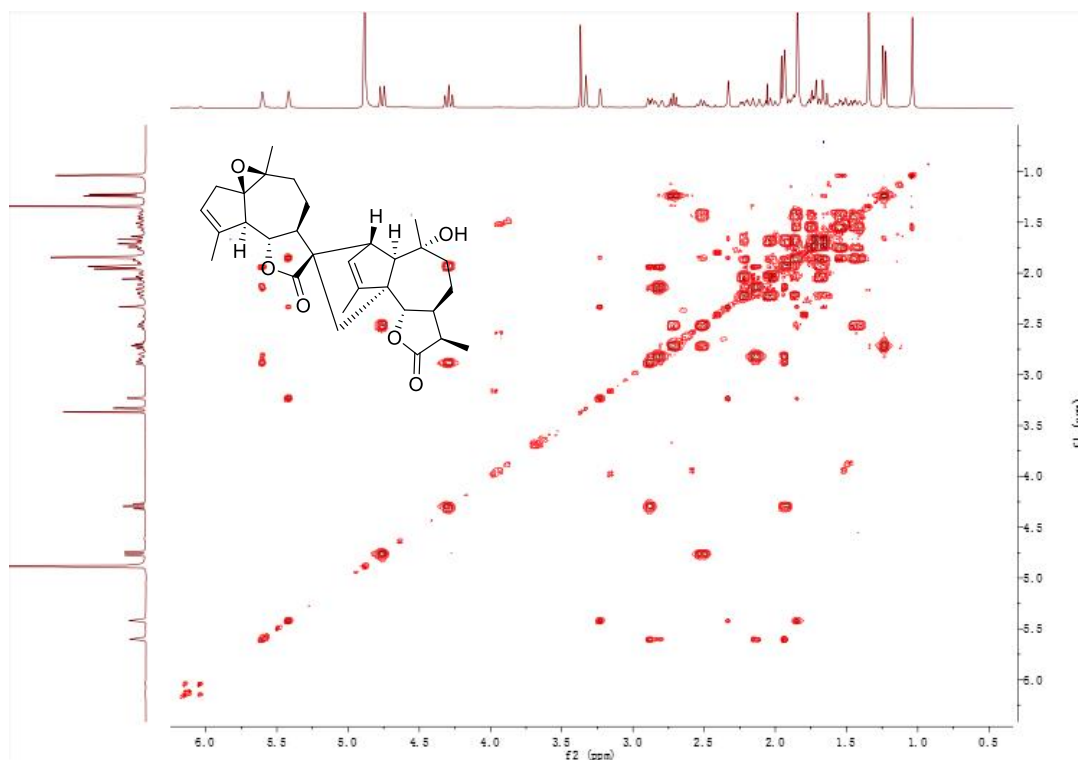

**Figure S55**  $^1\text{H}$ - $^1\text{H}$  COSY spectrum (600 MHz) of artematrolide D (**6**) in  $\text{CD}_3\text{OD}$ .

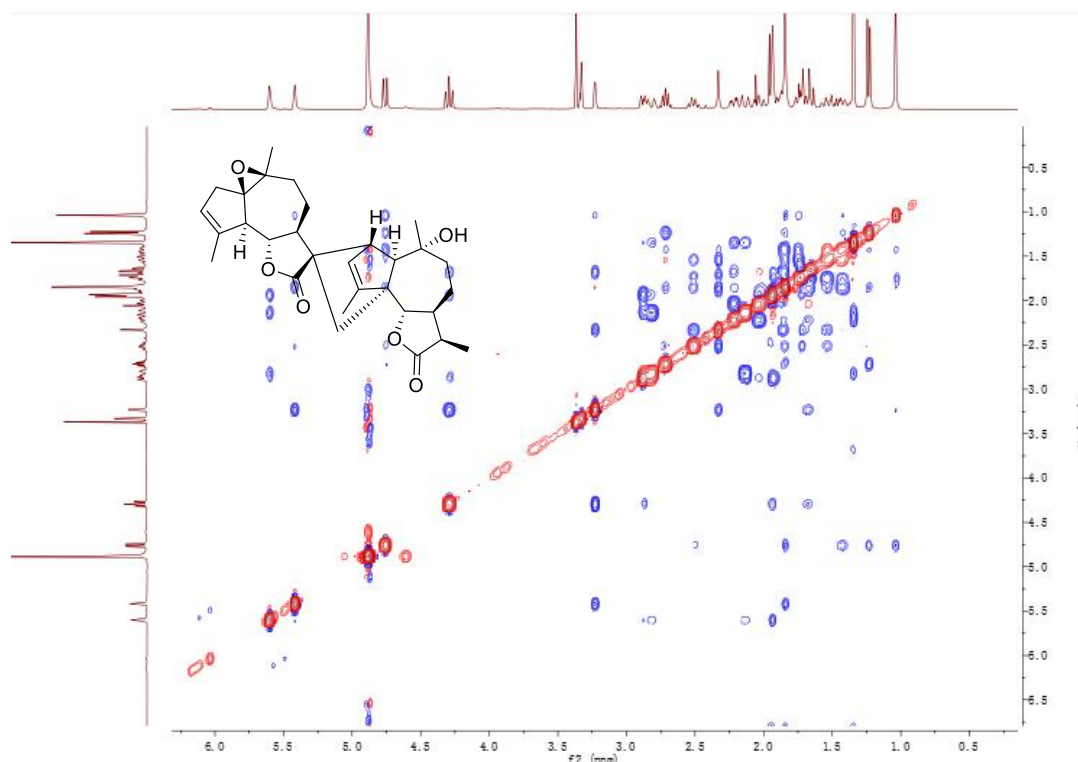

**Figure S56** ROESY spectrum (600 MHz) of artematrolide D (**6**) in  $\text{CD}_3\text{OD}$ .



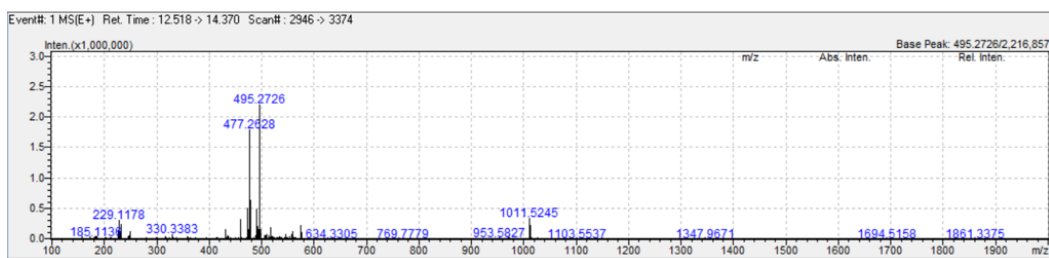

Figure S57 HRESIMS spectrum of artematrolide D (6).

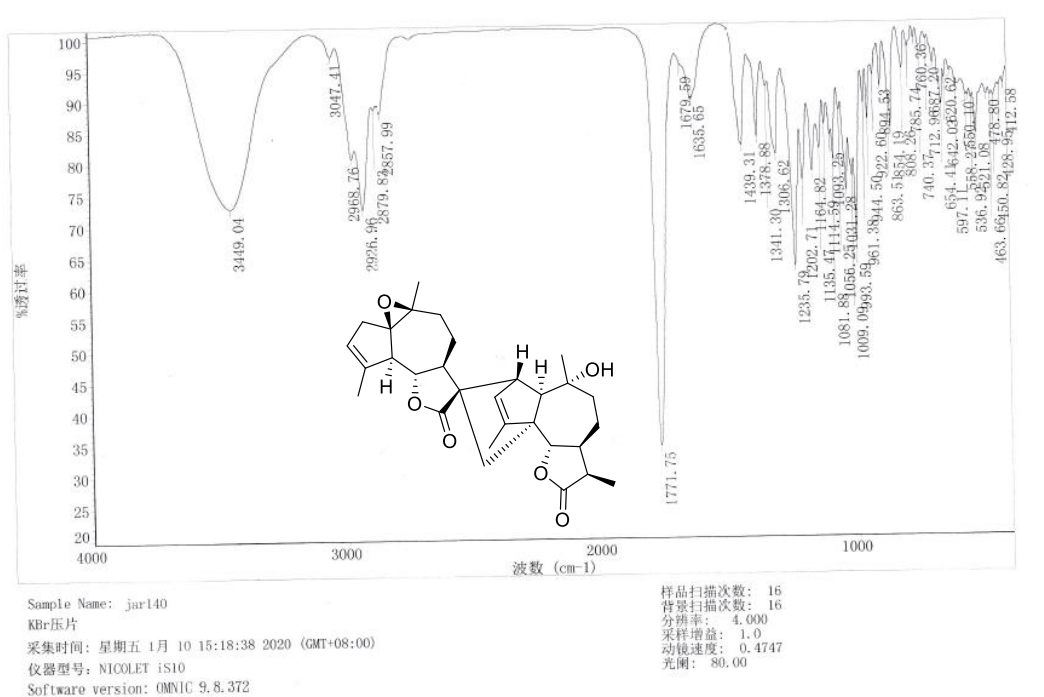

Figure S58 IR spectrum of artematrolide D (6).

**Rudolph Research Analytical**

This sample was measured on an Autopol VI, Serial #91058  
 Manufactured by Rudolph Research Analytical, Hackettstown, NJ, USA.  
 Measurement Date : Saturday, 04-JAN-2020  
 Set Temperature : OFF  
 Time Delay : Disabled  
 Delay between Measurement : Disabled

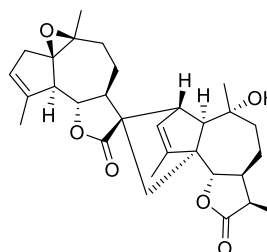

| n | Average | Std.Dev. | % RSD | Maximum | Minimum |
|---|---------|----------|-------|---------|---------|
| 5 | 180.04  | 0.51     | 0.28  | 180.52  | 179.31  |

  

| S.No | Sample ID | Time        | Result | Scale | OR °Arc | WLG.nm | Lg.mm  | Conc.g/100ml | Temp. |
|------|-----------|-------------|--------|-------|---------|--------|--------|--------------|-------|
| 1    | jar140    | 01:53:45 PM | 180.00 | SR    | 0.1044  | 589    | 100.00 | 0.058        | 22.6  |
| 2    | jar140    | 01:53:53 PM | 179.83 | SR    | 0.1043  | 589    | 100.00 | 0.058        | 22.6  |
| 3    | jar140    | 01:54:01 PM | 180.52 | SR    | 0.1047  | 589    | 100.00 | 0.058        | 22.6  |
| 4    | jar140    | 01:54:09 PM | 179.31 | SR    | 0.1040  | 589    | 100.00 | 0.058        | 22.6  |
| 5    | jar140    | 01:54:17 PM | 180.52 | SR    | 0.1047  | 589    | 100.00 | 0.058        | 22.6  |

Figure S59 Optical rotation spectrum of artematrolide D (6).

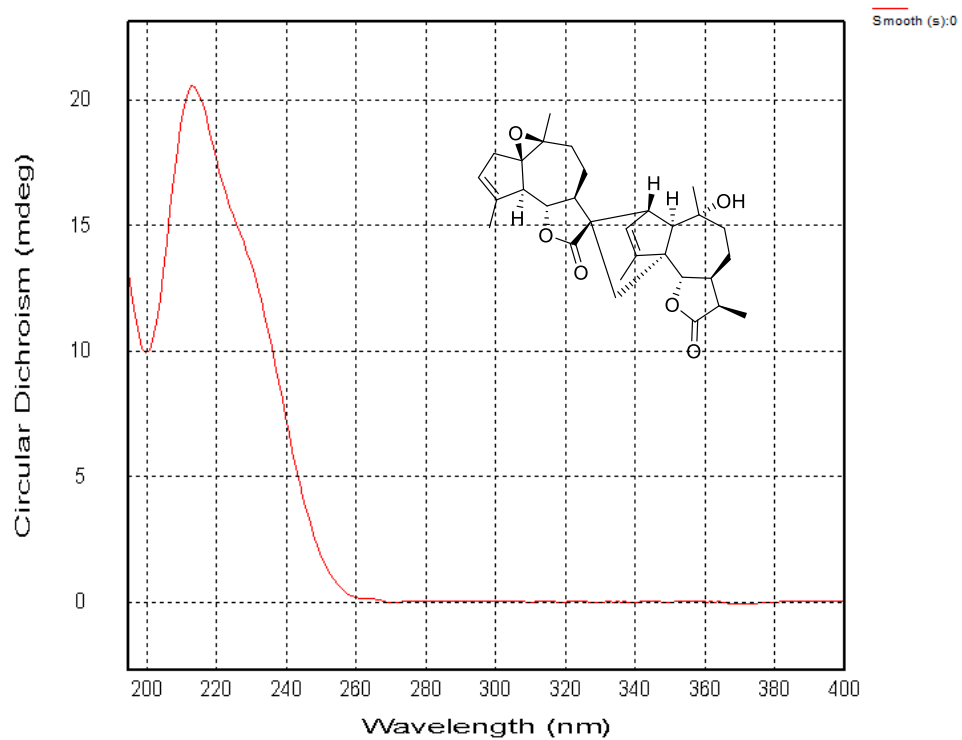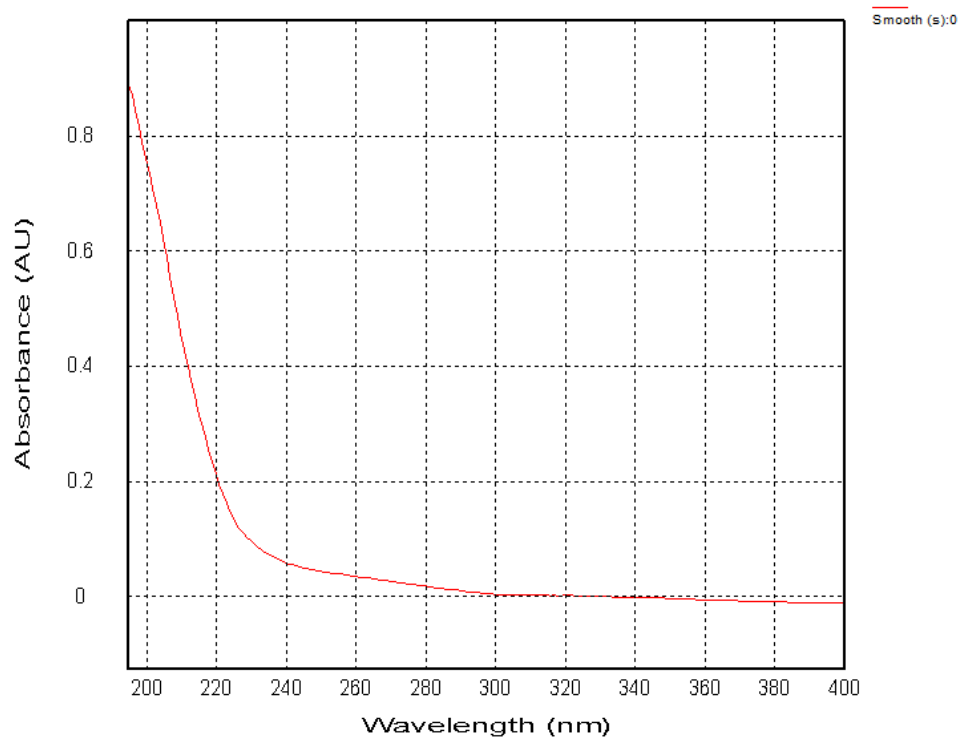

**Figure S60** CD (top) and UV (bottom) spectra of artematrolide D (**6**).

## 8. NMR, MS, IR, $[\alpha]_D$ and CD spectra of compound 7

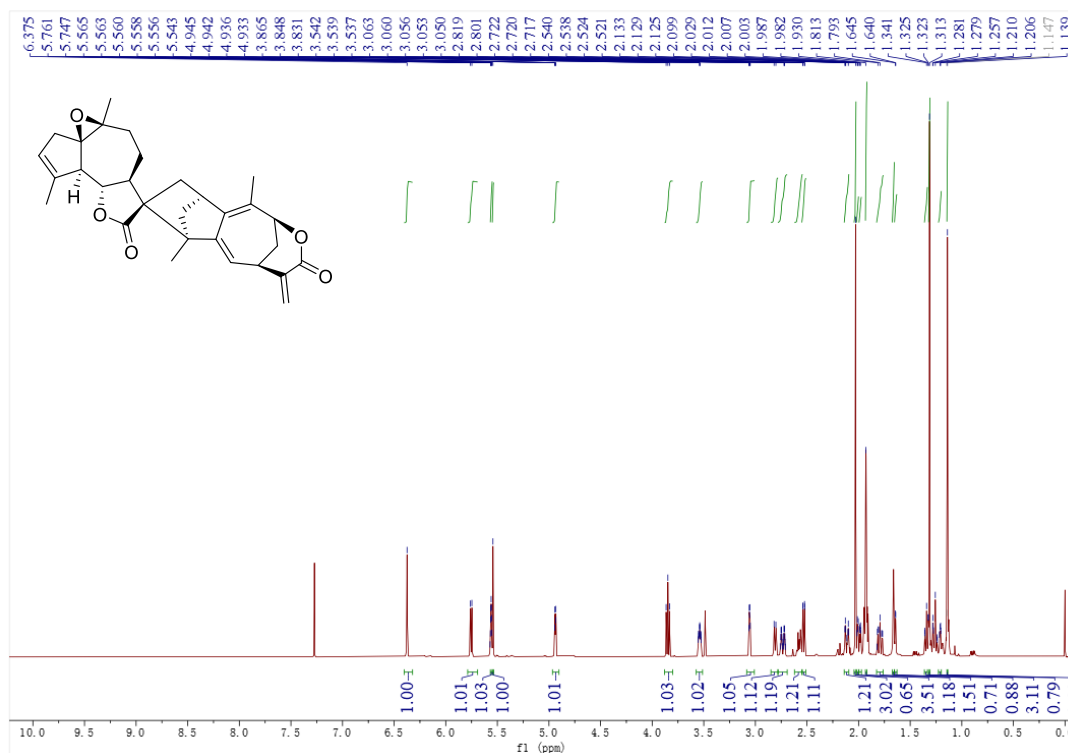

Figure S61  $^1\text{H}$  NMR spectrum (600 MHz) of artematrolide E (7) in  $\text{CDCl}_3$ .

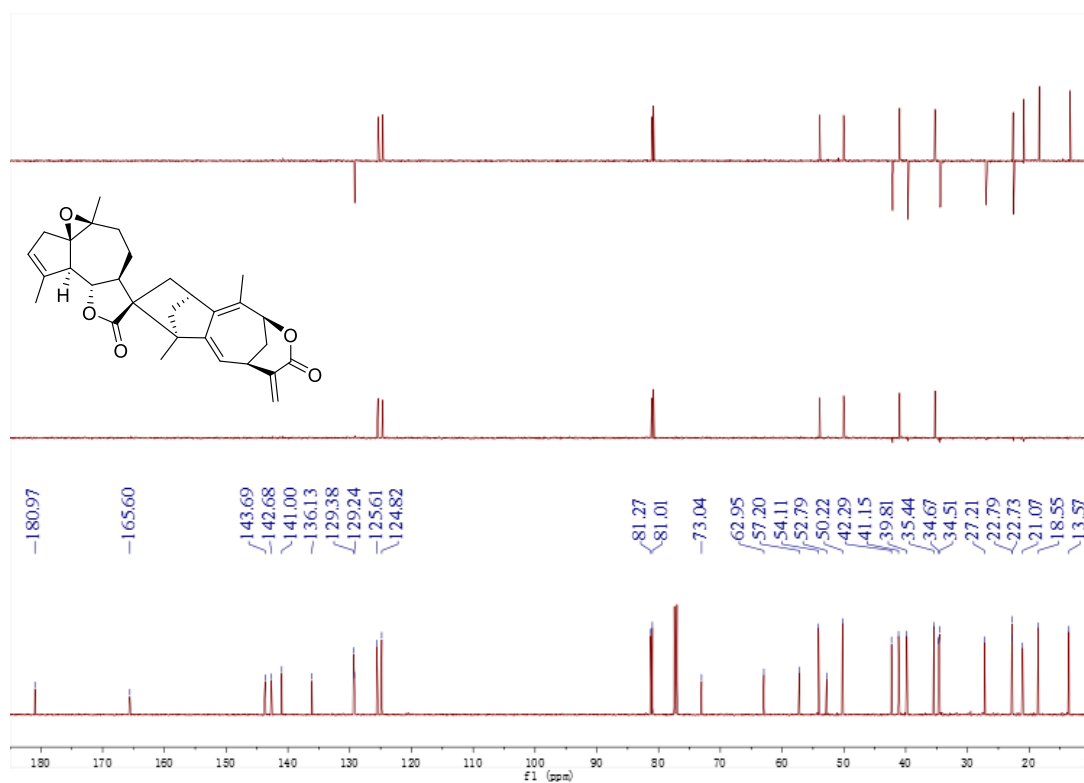

Figure S62  $^{13}\text{C}$  NMR spectrum (150 MHz) of artematrolide E (7) in  $\text{CDCl}_3$ .

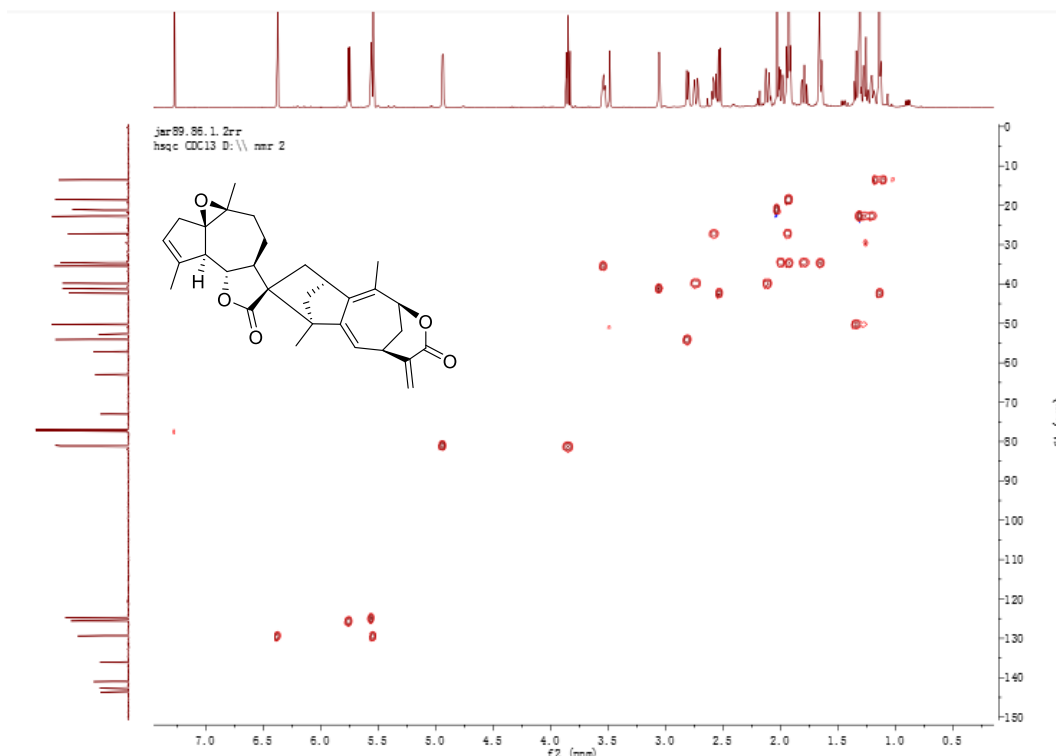

**Figure S63** HSQC spectrum (600 MHz) of artematrolide E (**7**) in  $\text{CDCl}_3$ .

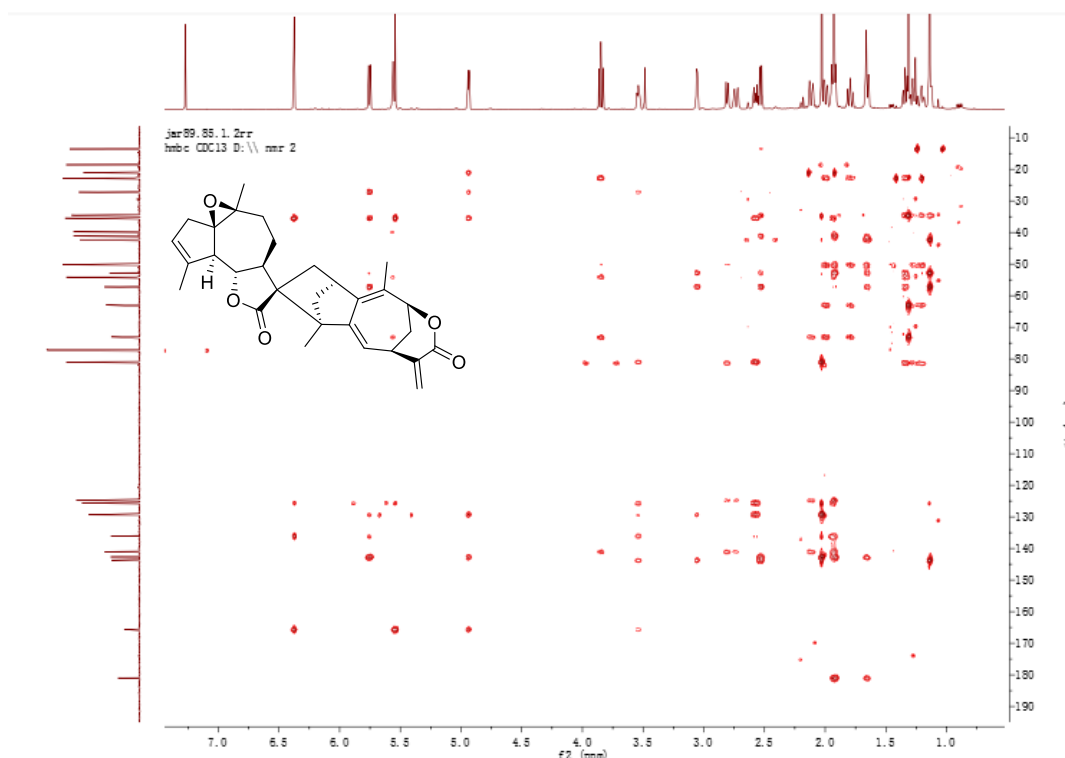

**Figure S64** HMBC spectrum (600 MHz) of artematrolide E (**7**) in  $\text{CDCl}_3$ .

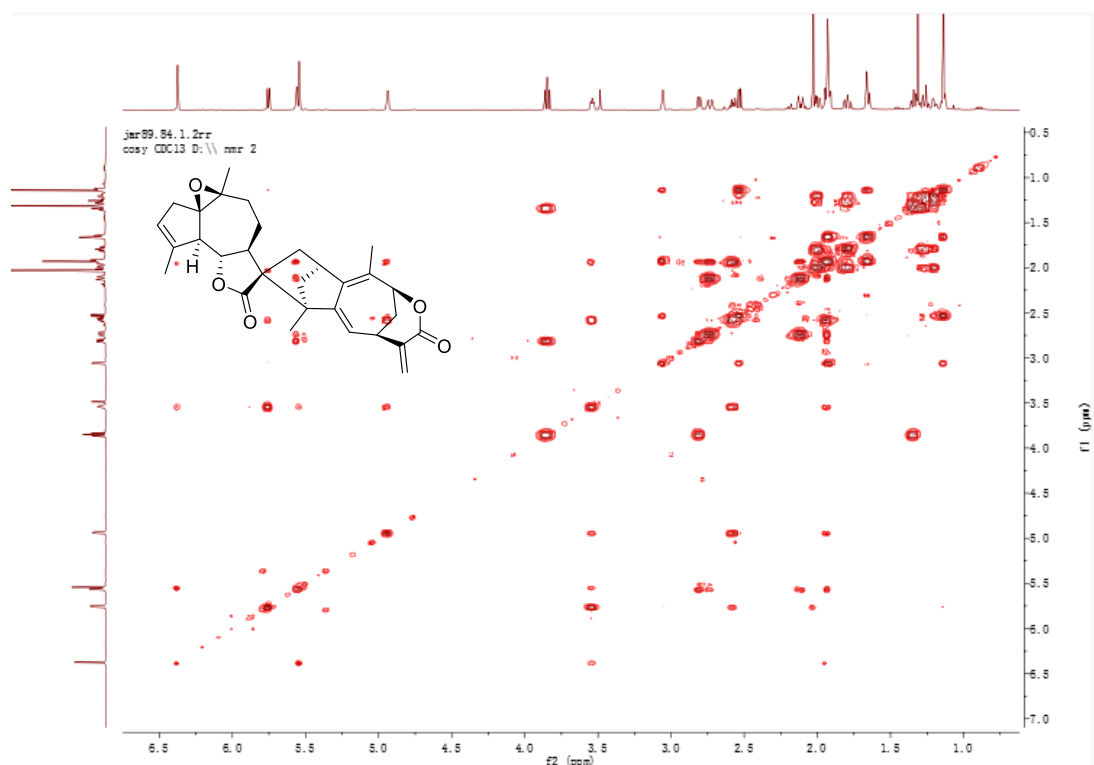

**Figure S65**  $^1\text{H}$ - $^1\text{H}$  COSY spectrum (600 MHz) of artematrolide E (**7**) in  $\text{CDCl}_3$ .

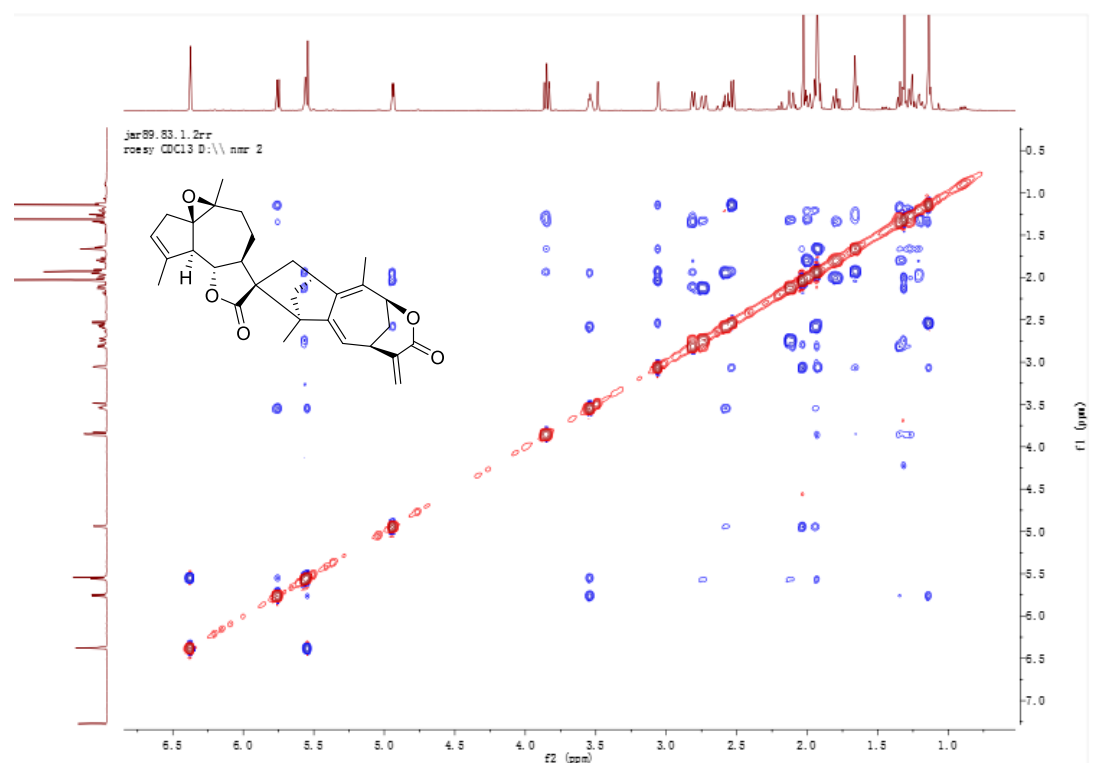

**Figure S66** ROESY spectrum (600 MHz) of artematrolide E (**7**) in  $\text{CDCl}_3$ .

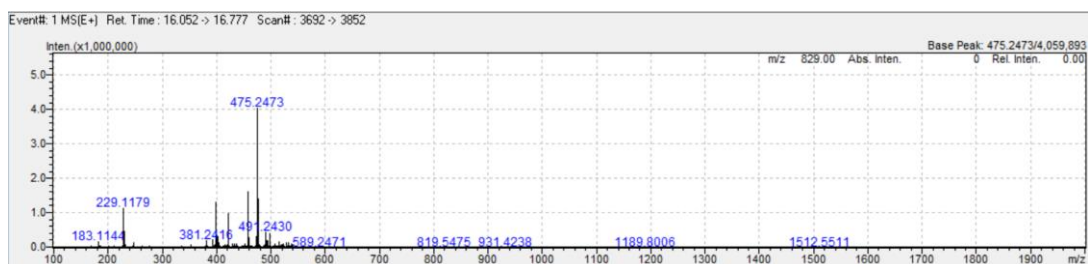

Figure S67 HRESIMS spectrum of artematrolide E (7).

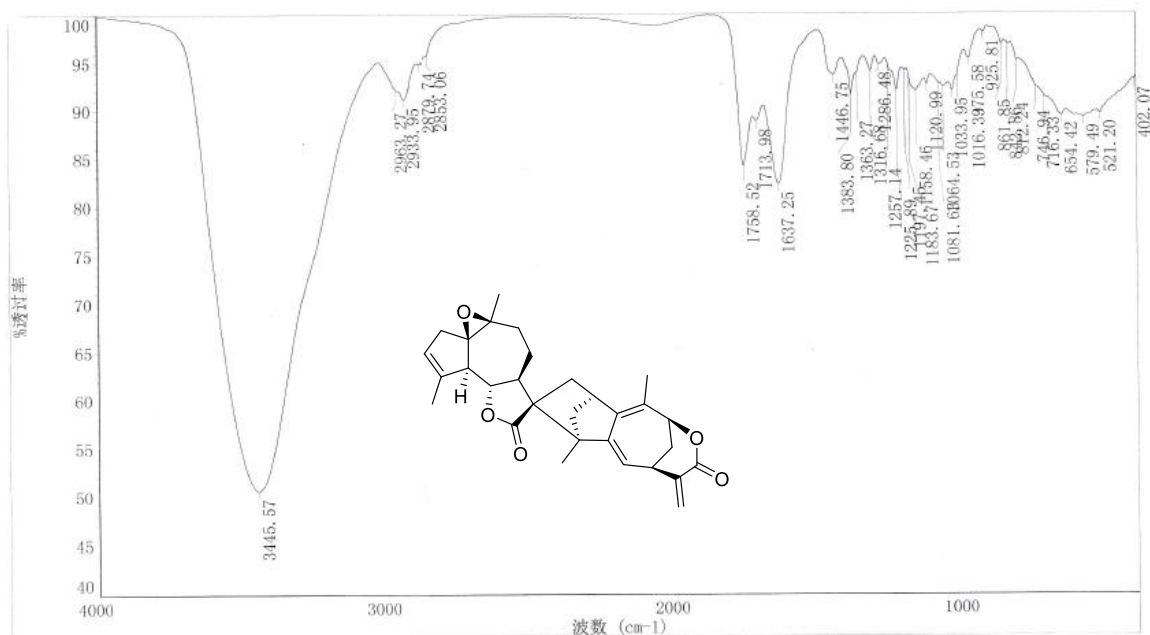

Sample Name: jar89  
 3Br压片  
 采集时间: 星期一 1月 13 09:47:01 2020 (GMT+08:00)  
 仪器型号: NICOLET iS10  
 Software version: OMNIC 9.8.372

样品扫描次数: 16  
 背景扫描次数: 16  
 分辨率: 4.000  
 采样增益: 1.0  
 动镜速度: 0.4747  
 光阑: 80.00

Figure S68 IR spectrum of artematrolide E (7).

**Rudolph Research Analytical**

This sample was measured on an Autopol VI, Serial #91058  
 Manufactured by Rudolph Research Analytical, Hackettstown, NJ, USA.  
 Measurement Date : Saturday, 04-JAN-2020  
 Set Temperature : OFF  
 Time Delay : Disabled  
 Delay between Measurement : Disabled

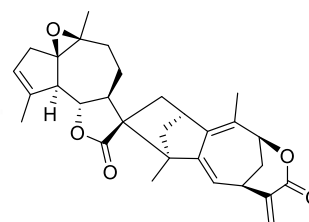

| n    | Average   | Std.Dev.    | % RSD  | Maximum | Minimum |        |        |              |       |  |
|------|-----------|-------------|--------|---------|---------|--------|--------|--------------|-------|--|
| 5    | 48.41     | 0.46        | 0.95   | 49.04   | 47.83   |        |        |              |       |  |
| S.No | Sample ID | Time        | Result | Scale   | OR °Arc | WLG.nm | Lg.mm  | Conc.g/100ml | Temp. |  |
| 1    | jar89     | 12:49:01 PM | 48.19  | SR      | 0.0400  | 589    | 100 00 | 0.083        | 21.8  |  |
| 2    | jar89     | 12:49:10 PM | 47.83  | SR      | 0.0397  | 589    | 100 00 | 0.083        | 21.8  |  |
| 3    | jar89     | 12:49:18 PM | 48.67  | SR      | 0.0404  | 589    | 100 00 | 0.083        | 21.8  |  |
| 4    | jar89     | 12:49:26 PM | 49.04  | SR      | 0.0407  | 589    | 100 00 | 0.083        | 21.8  |  |
| 5    | jar89     | 12:49:35 PM | 48.31  | SR      | 0.0401  | 589    | 100 00 | 0.083        | 21.8  |  |

Figure S69 Optical rotation spectrum of artematrolide E (7).

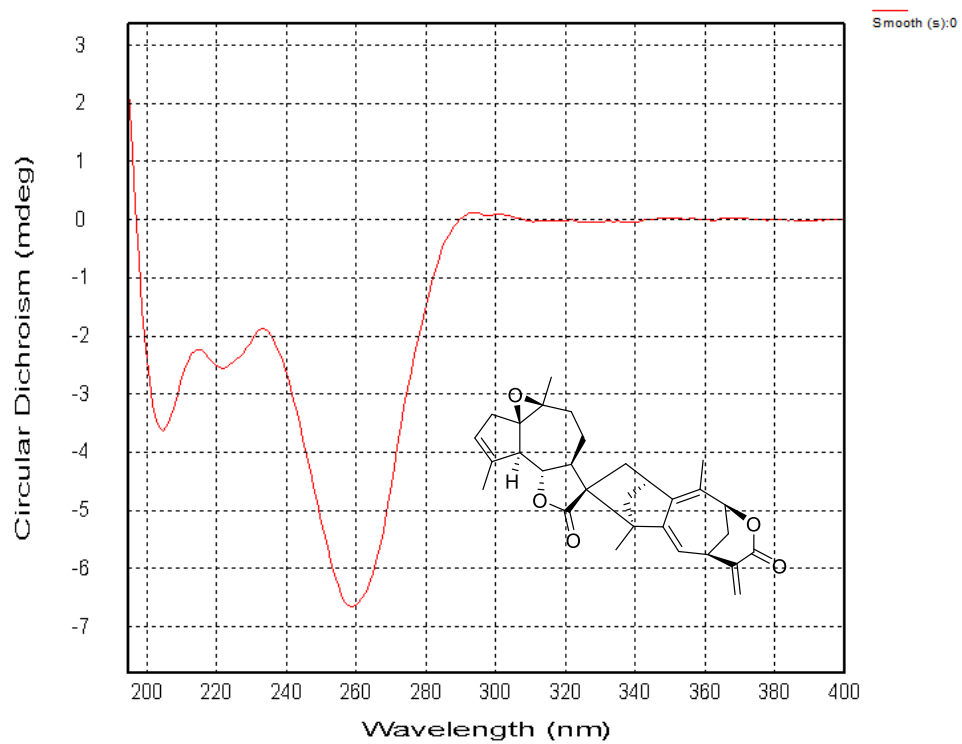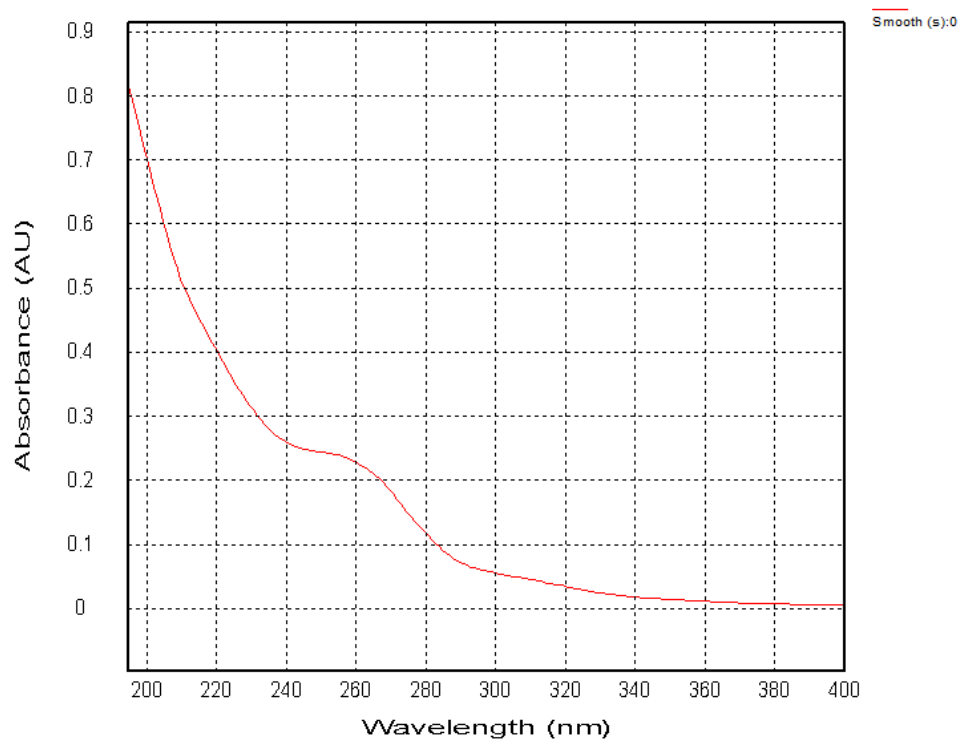

**Figure S70** CD (top) and UV (bottom) spectra of artematrolide E (**7**).

## 9. NMR, MS, IR, $[\alpha]_D$ and CD spectra of compound 8

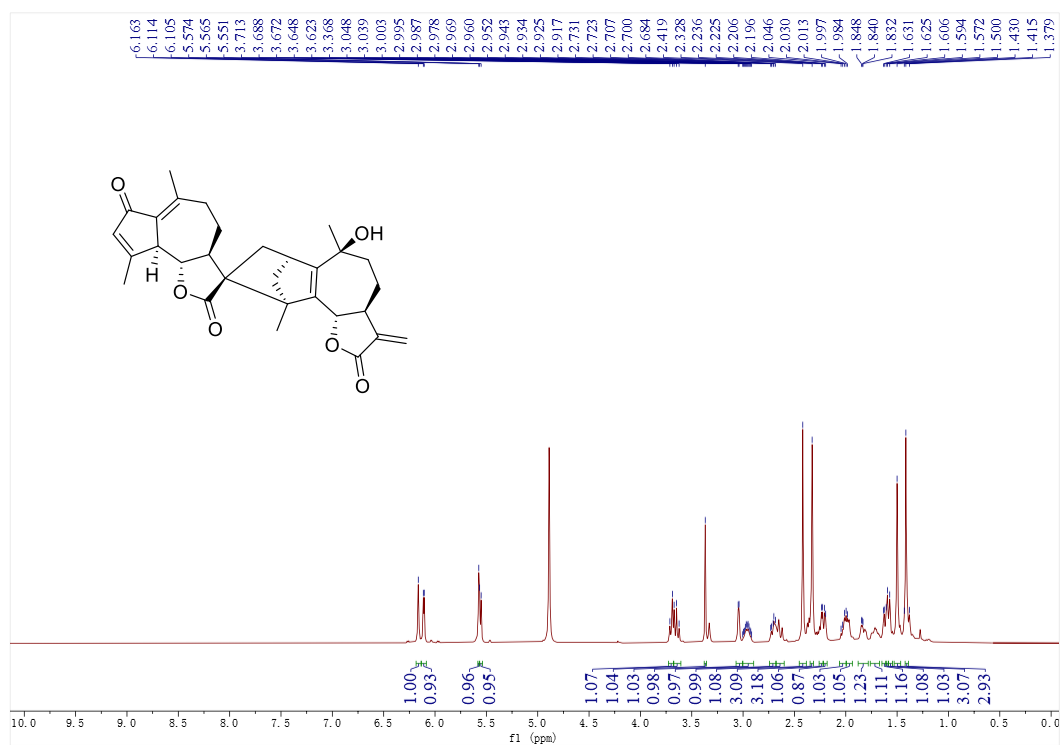

**Figure S71**  $^1\text{H}$  NMR spectrum (400 MHz) of artematrolide F (**8**) in  $\text{CD}_3\text{OD}$ .

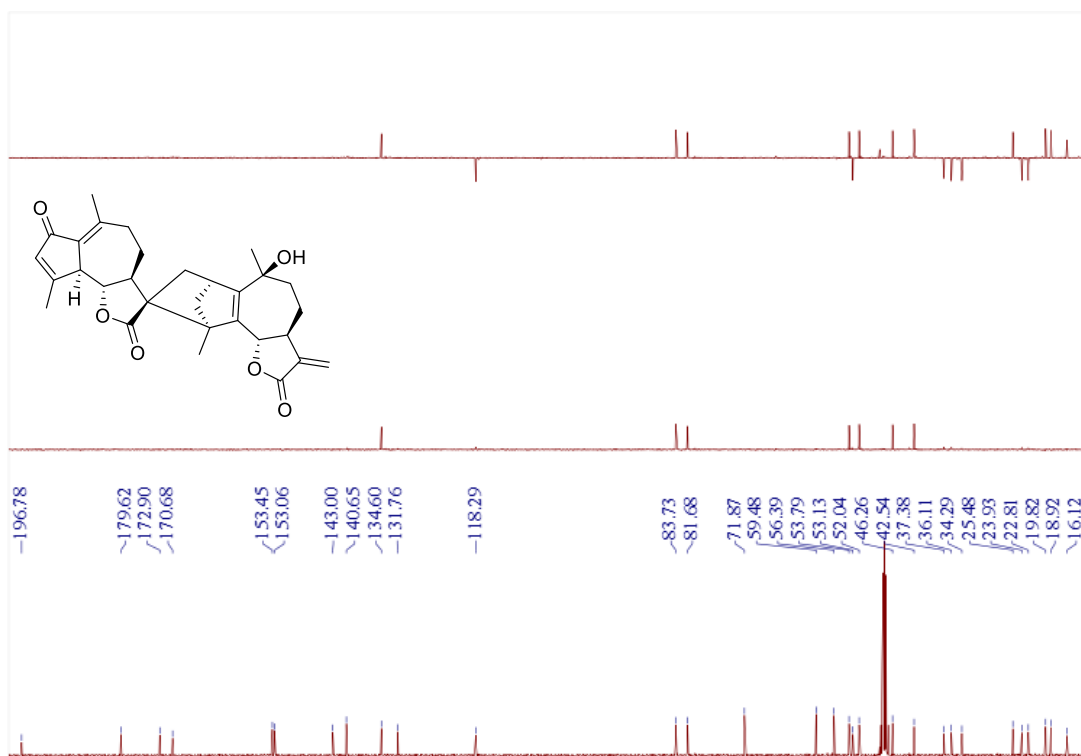

**Figure S72**  $^{13}\text{C}$  NMR spectrum (100 MHz) of artematrolide F (**8**) in  $\text{CD}_3\text{OD}$ .



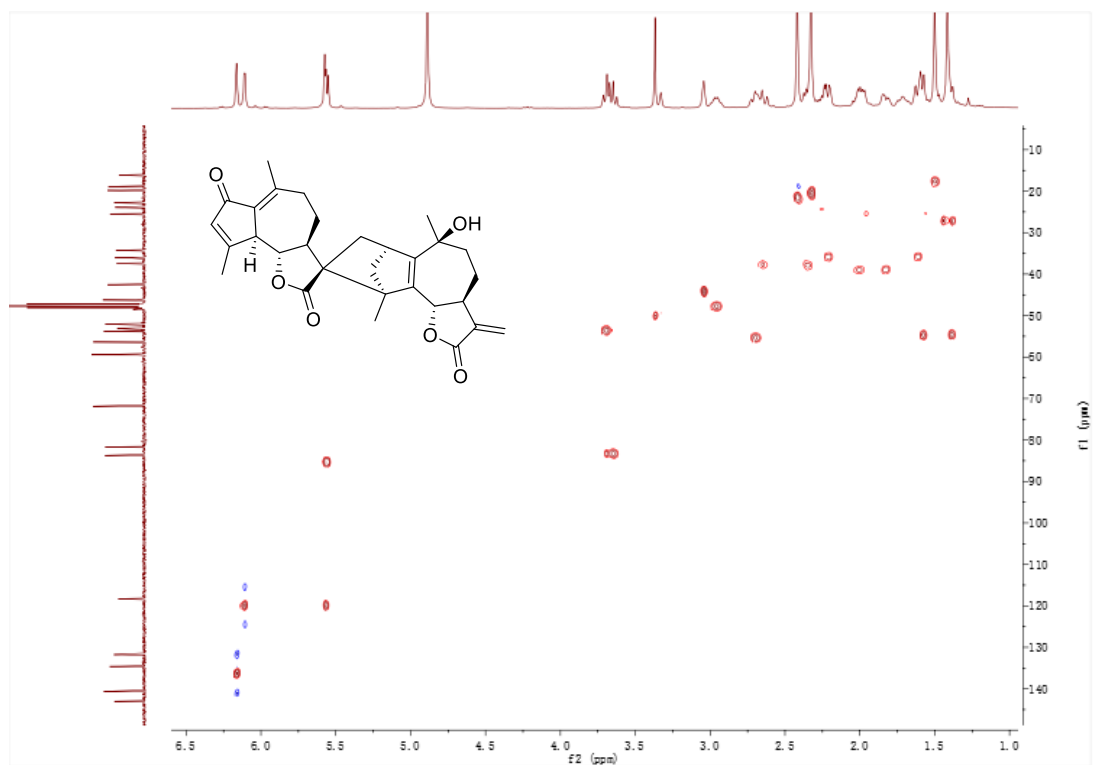

**Figure S73** HSQC spectrum (600 MHz) of artematrolide F (**8**) in CD<sub>3</sub>OD.

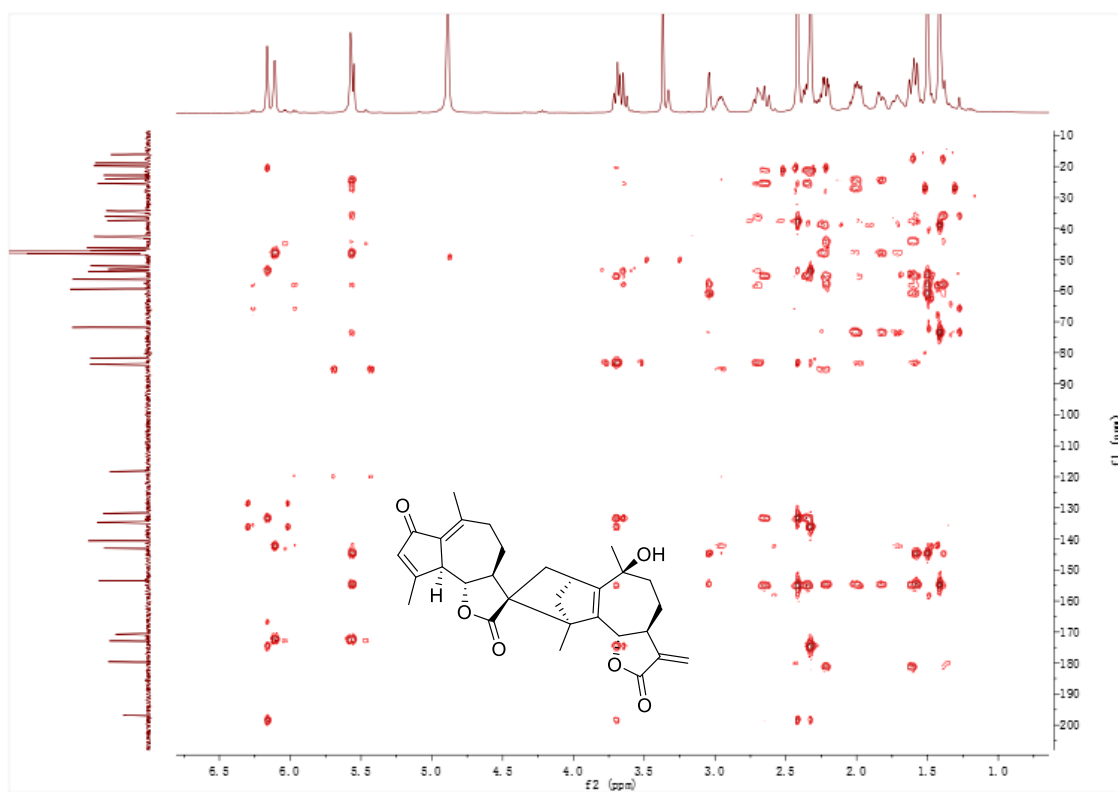

**Figure S74** HMBC spectrum (600 MHz) of artematrolide F (**8**) in CD<sub>3</sub>OD.

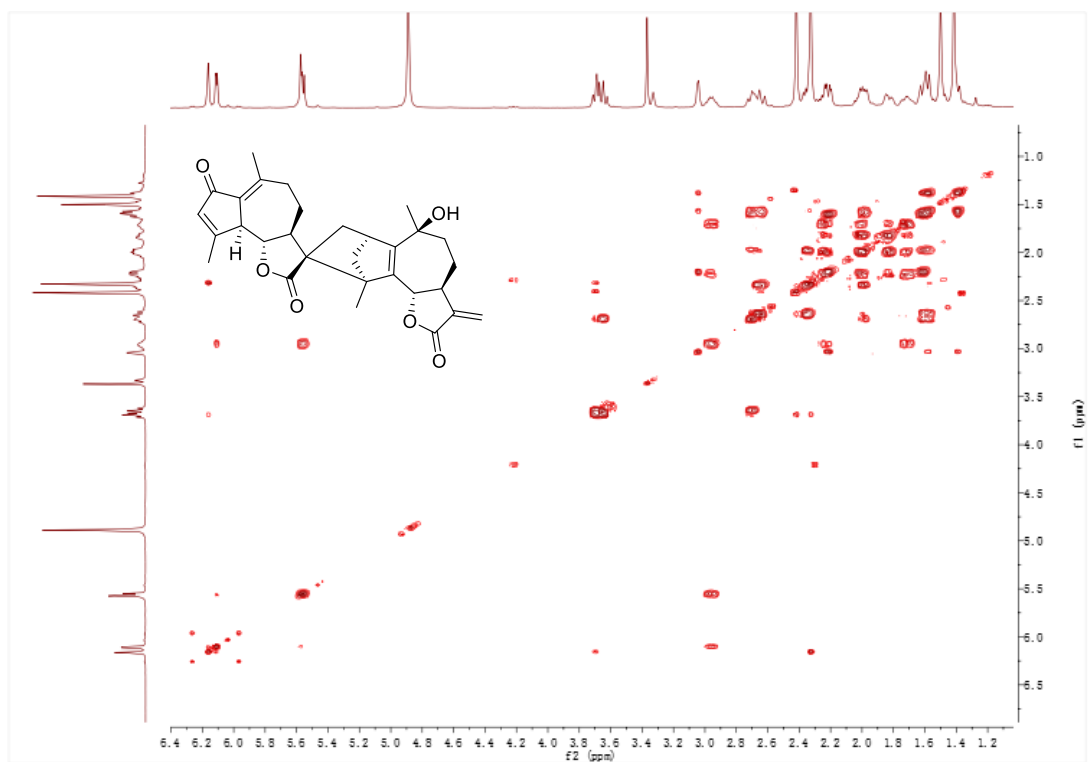

**Figure S75**  $^1\text{H}$ - $^1\text{H}$  COSY spectrum (600 MHz) of artematrolide F (**8**) in  $\text{CD}_3\text{OD}$ .

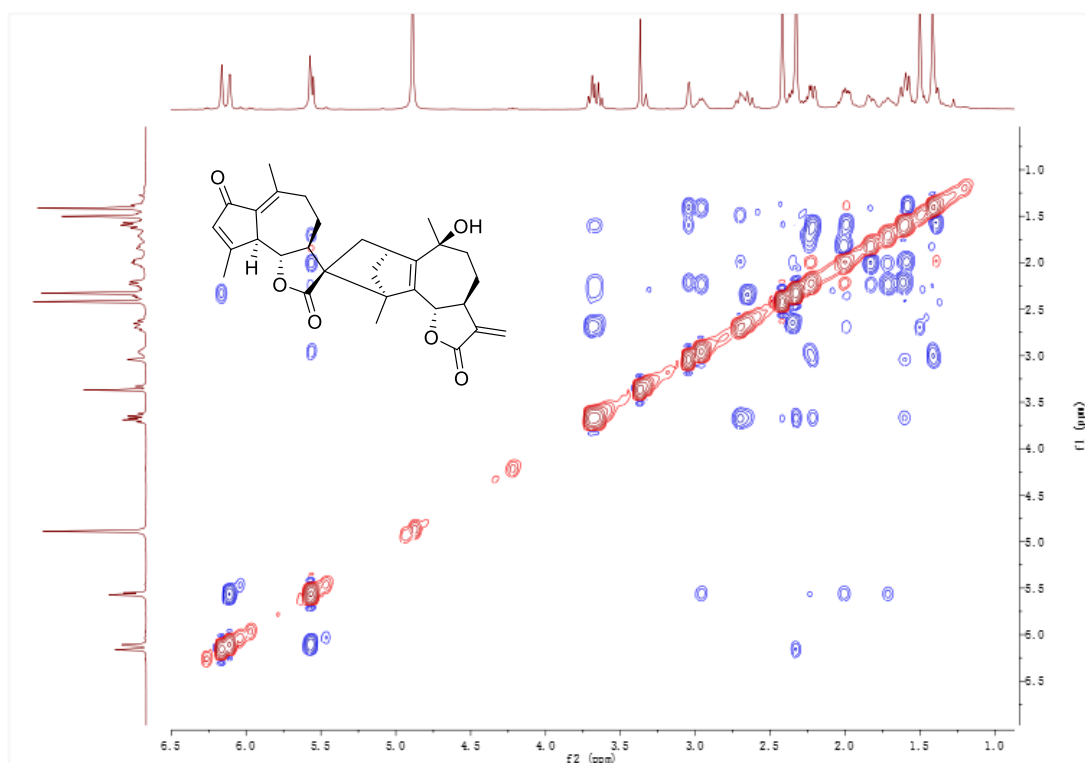

**Figure S76** ROESY spectrum (600 MHz) of artematrolide F (**8**) in  $\text{CD}_3\text{OD}$ .

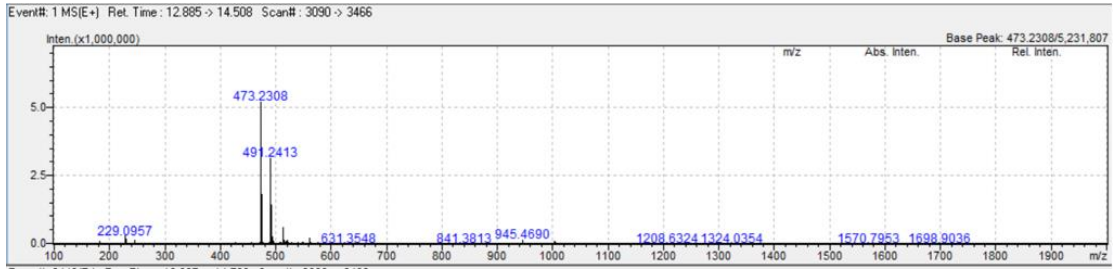

Figure S77 HRESIMS spectrum of artematrolide F (8).

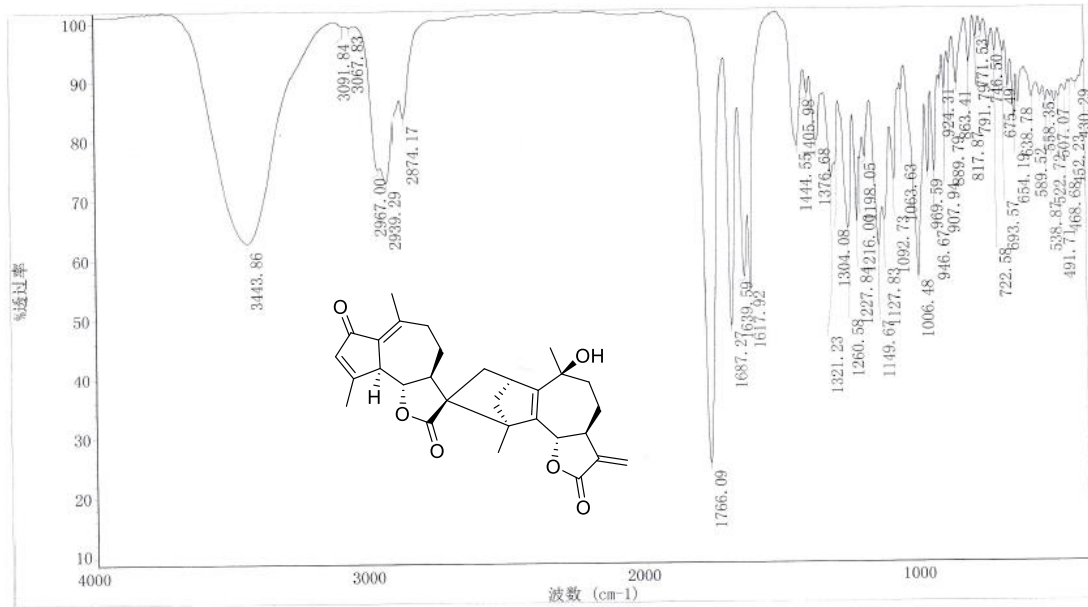

Sample Name: jar151

KBr压片

采集时间: 星期四 1月 02 16:28:22 2020 (GMT+08:00)

仪器型号: NICOLET iS10

Software version: OMNIC 9.8.372

样品扫描次数: 16

背景扫描次数: 16

分辨率: 4.000

采样增益: 1.0

动镜速度: 0.4747

光阑: 80.00

Figure S78 IR spectrum of artematrolide F (8).

**Rudolph Research Analytical**

This sample was measured on an Autopol VI, Serial #91058  
Manufactured by Rudolph Research Analytical, Hackettstown, NJ, USA.

Measurement Date : Thursday, 19-DEC-2019

Set Temperature : OFF

Time Delay : Disabled

Delay between Measurement : Disabled

| n | Average | Std.Dev. | % RSD | Maximum | Minimum |
|---|---------|----------|-------|---------|---------|
| 5 | 83.05   | 0.15     | 0.18  | 83.21   | 82.89   |

| S.No | Sample ID | Time        | Result | Scale | OR °Arc | WLG.nm | Lg.mm  | Conc.g/100ml | Temp. |
|------|-----------|-------------|--------|-------|---------|--------|--------|--------------|-------|
| 1    | jar151    | 03:36:44 PM | 82.96  | SR    | 0.1319  | 589    | 100.00 | 0.159        | 22.0  |
| 2    | jar151    | 03:36:53 PM | 82.89  | SR    | 0.1318  | 589    | 100.00 | 0.159        | 22.0  |
| 3    | jar151    | 03:37:01 PM | 83.21  | SR    | 0.1323  | 589    | 100.00 | 0.159        | 22.0  |
| 4    | jar151    | 03:37:09 PM | 83.21  | SR    | 0.1323  | 589    | 100.00 | 0.159        | 22.0  |
| 5    | jar151    | 03:37:17 PM | 82.96  | SR    | 0.1319  | 589    | 100.00 | 0.159        | 21.9  |

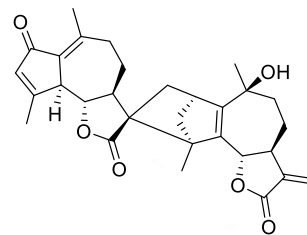

Figure S79 Optical rotation spectrum of artematrolide F (8).

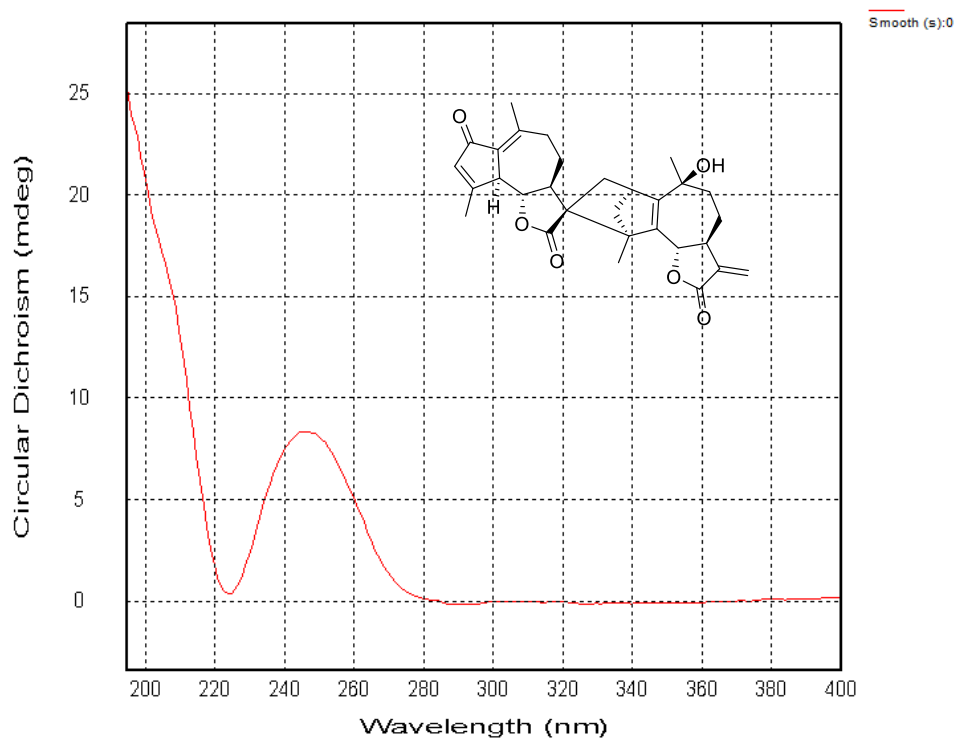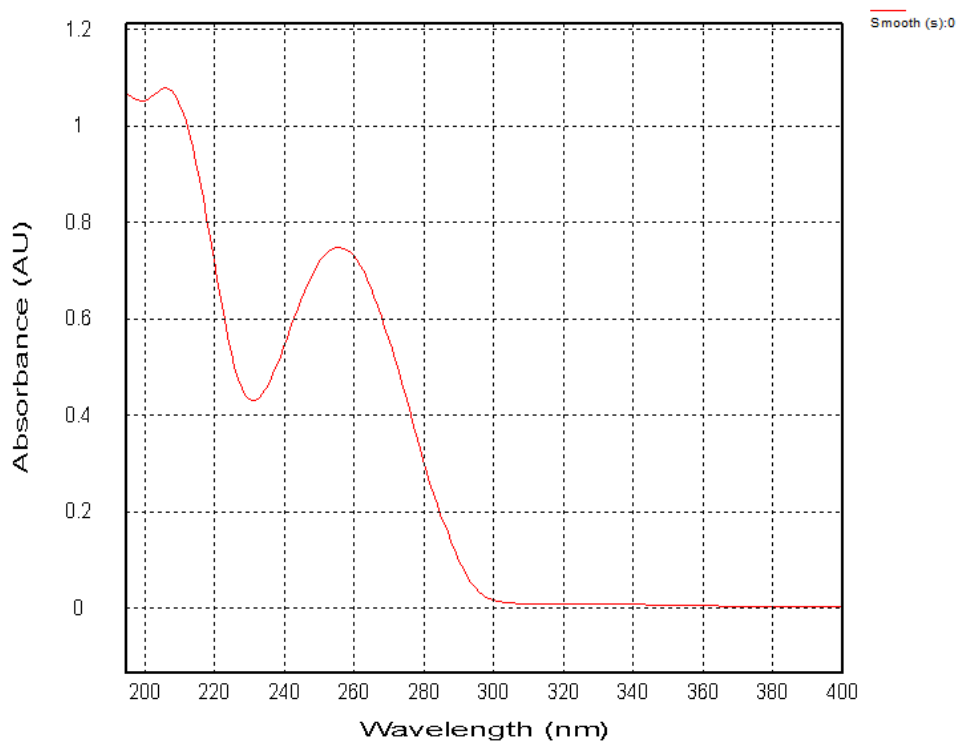

**Figure S80** CD (top) and UV (bottom) spectra of artematrolide F (**8**).

## 10. NMR, MS, IR, $[\alpha]_D$ and CD spectra of compound 9

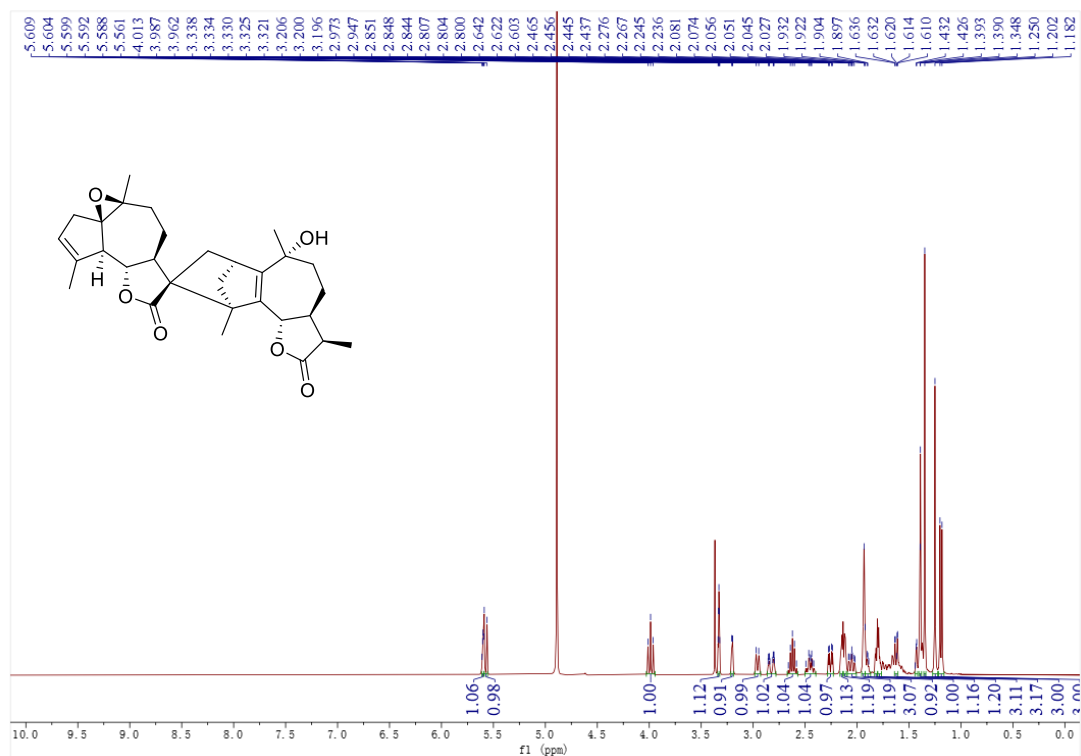

**Figure S81**  $^1\text{H}$  NMR spectrum (400 MHz) of lavandiolide J (**9**) in  $\text{CD}_3\text{OD}$ .

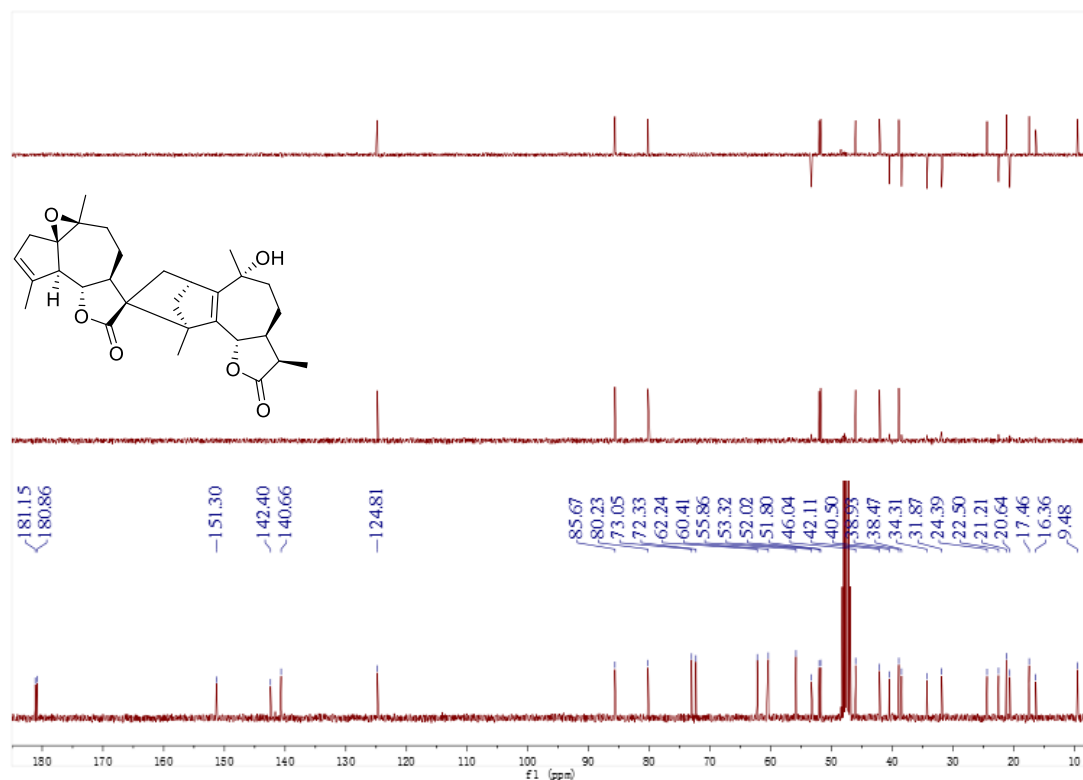

**Figure S82**  $^{13}\text{C}$  NMR spectrum (100 MHz) of lavandiolide J (**9**) in  $\text{CD}_3\text{OD}$ .

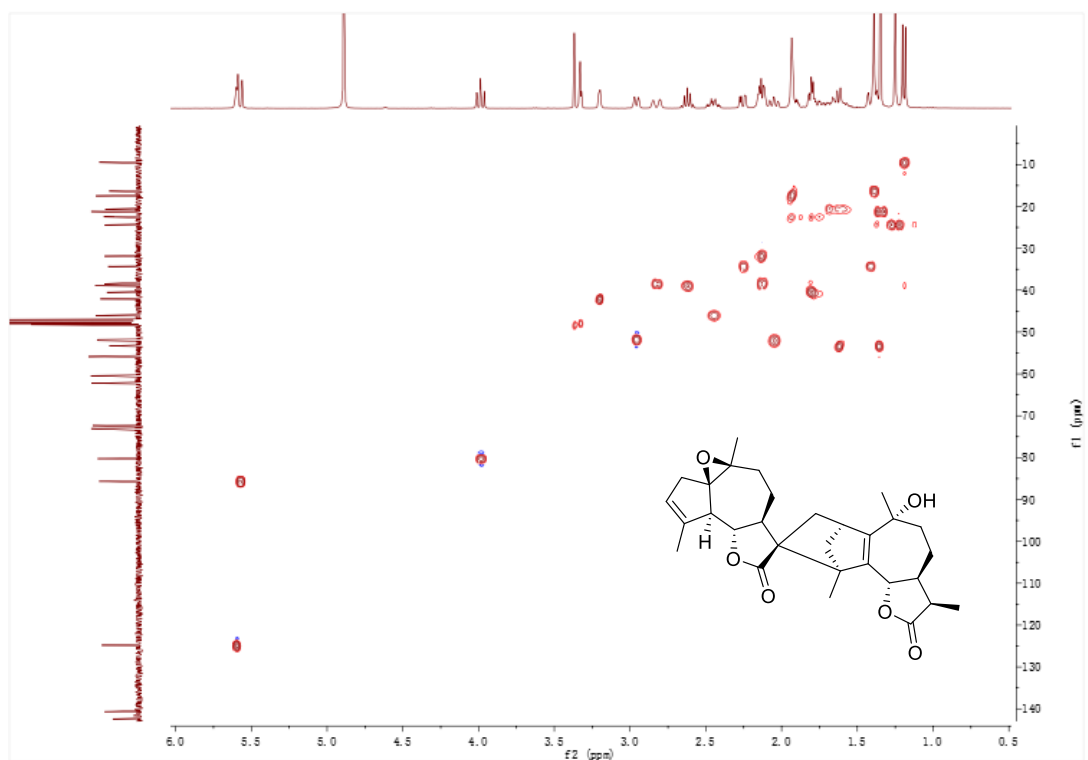

**Figure S83** HSQC spectrum (600 MHz) of lavandiolid J (**9**) in CD<sub>3</sub>OD.

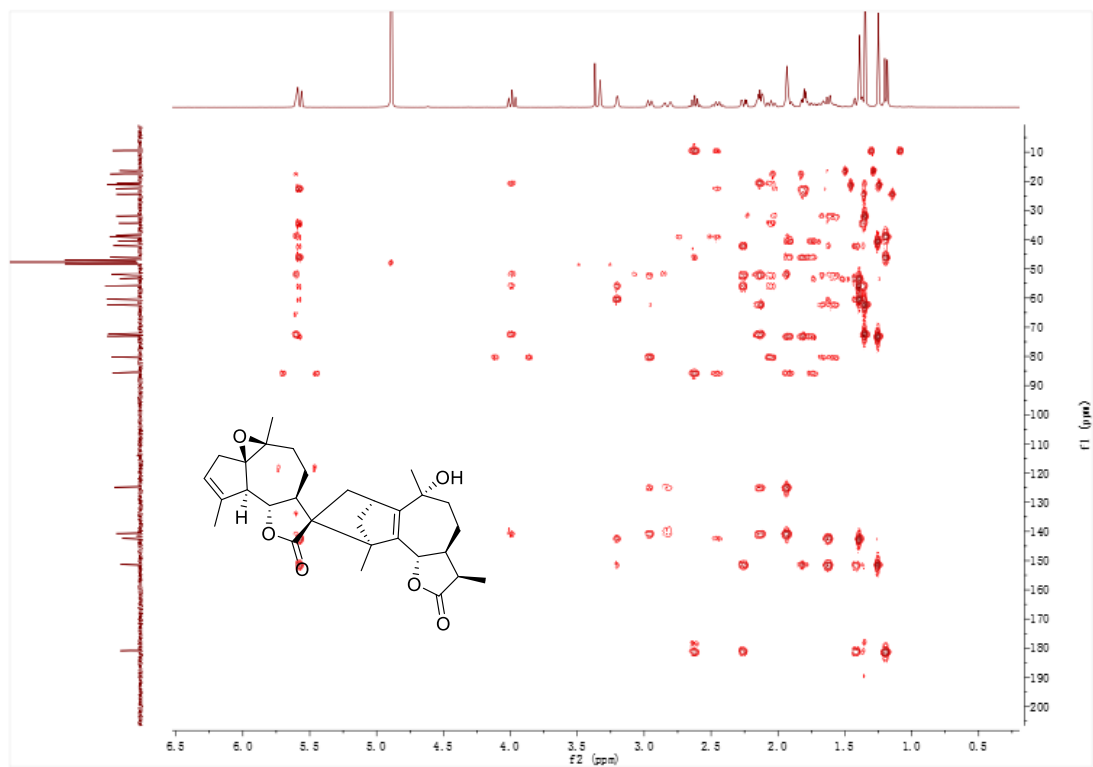

**Figure S84** HMBC spectrum (600 MHz) of lavandiolid J (**9**) in CD<sub>3</sub>OD.

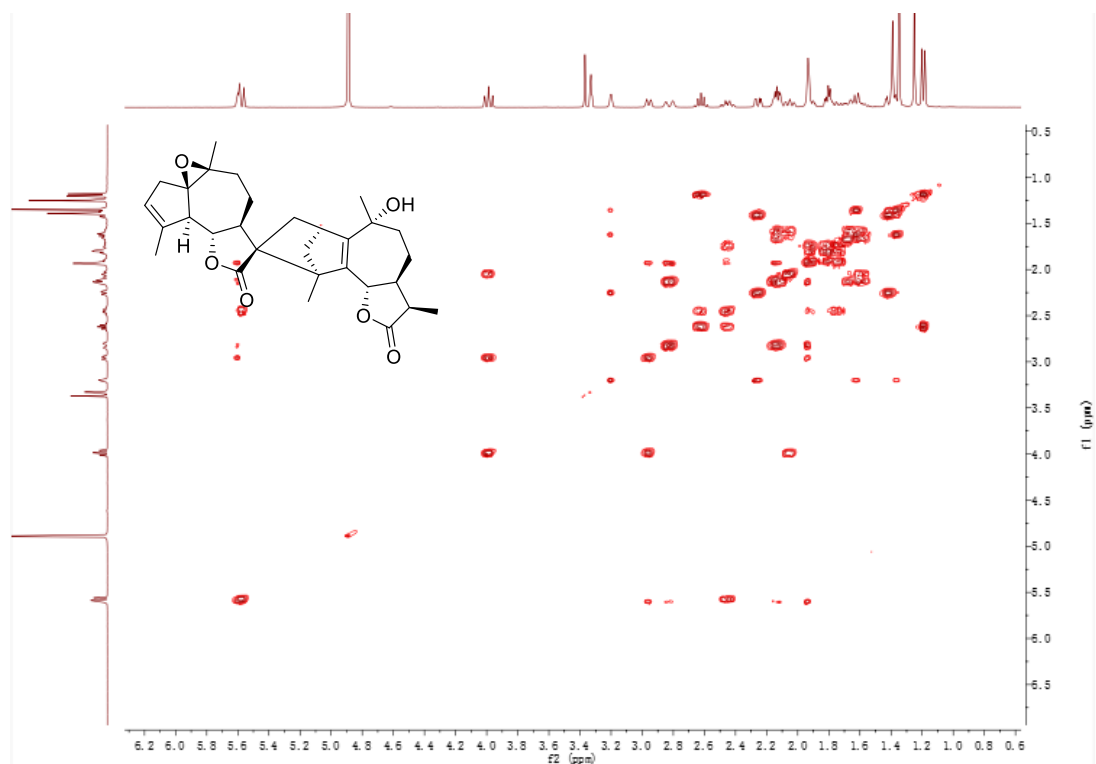

**Figure S85**  $^1\text{H}$ - $^1\text{H}$  COSY spectrum (600 MHz) of lavandiolid J (**9**) in  $\text{CD}_3\text{OD}$ .

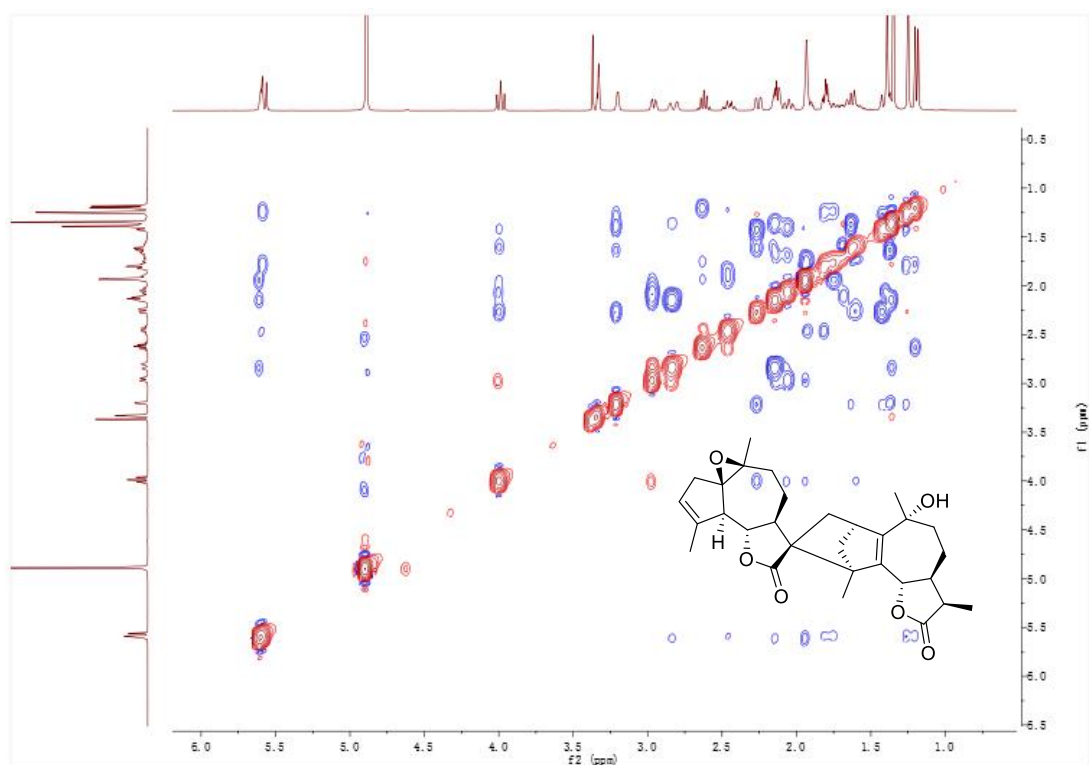

**Figure S86** ROESY spectrum (600 MHz) of lavandiolid J (**9**) in  $\text{CD}_3\text{OD}$ .

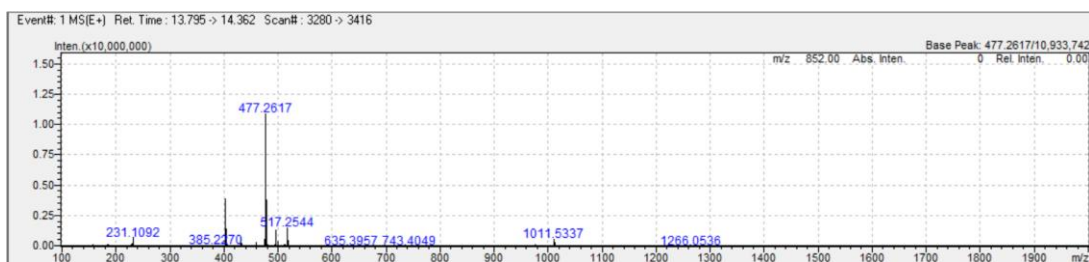

Figure S87 HRESIMS spectrum of lavandiolide J (9).

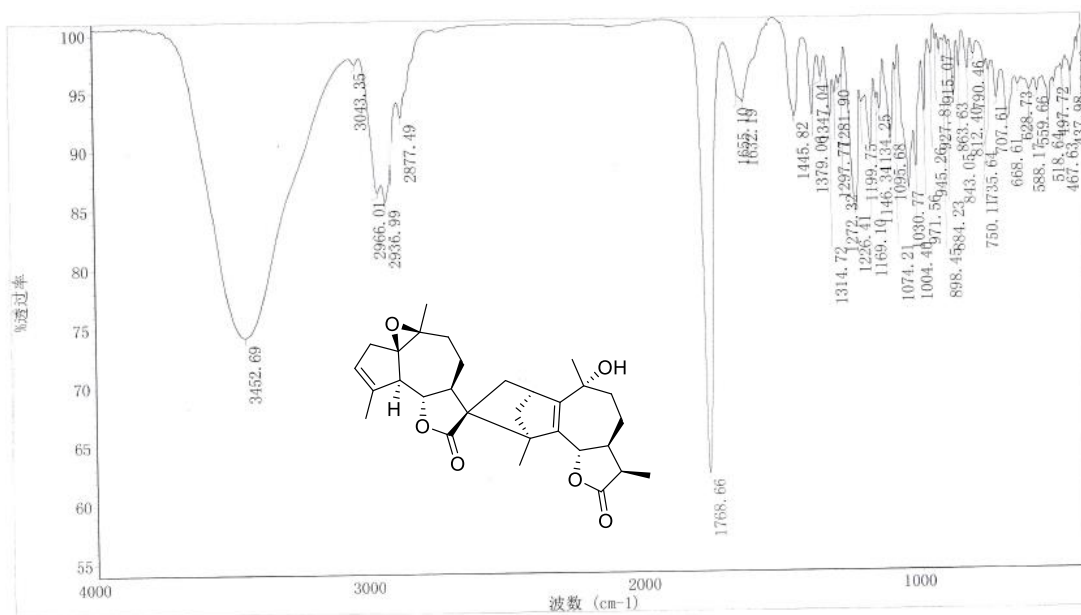

Sample Name: jar147

KBr压片

采集时间: 星期四 12月 26 19:30:54 2019 (GMT+08:00)

仪器型号: NICOLET iS10

Software version: OMNIC 9.8.372

样品扫描次数: 16  
背景扫描次数: 16  
分辨率: 4.000  
采样增益: 1.0  
动镜速度: 0.4747  
光阑: 80.00

Figure S88 IR spectrum of lavandiolide J (9).

**Rudolph Research Analytical**

This sample was measured on an Autopol VI, Serial #91058  
Manufactured by Rudolph Research Analytical, Hackettstown, NJ, USA.

Measurement Date: Friday, 13-DEC-2019

Set Temperature: OFF

Time Delay: Disabled

Delay between Measurement: Disabled

| n | Average | Std.Dev. | % RSD | Maximum | Minimum |
|---|---------|----------|-------|---------|---------|
| 5 | 69.45   | 0.16     | 0.23  | 69.61   | 69.22   |

| S.No | Sample ID | Time        | Result | Scale | OR °Arc | WL.G.nm | Lg.mm  | Conc.g/100ml | Temp. |
|------|-----------|-------------|--------|-------|---------|---------|--------|--------------|-------|
| 1    | jar147    | 05:20:42 PM | 69.41  | SR    | 0.0354  | 589     | 100.00 | 0.051        | 23.2  |
| 2    | jar147    | 05:20:51 PM | 69.61  | SR    | 0.0355  | 589     | 100.00 | 0.051        | 23.2  |
| 3    | jar147    | 05:20:59 PM | 69.61  | SR    | 0.0355  | 589     | 100.00 | 0.051        | 23.2  |
| 4    | jar147    | 05:21:07 PM | 69.41  | SR    | 0.0354  | 589     | 100.00 | 0.051        | 23.1  |
| 5    | jar147    | 05:21:15 PM | 69.22  | SR    | 0.0353  | 589     | 100.00 | 0.051        | 23.1  |

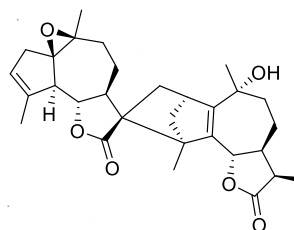

Figure S89 Optical rotation spectrum of lavandiolide J (9).



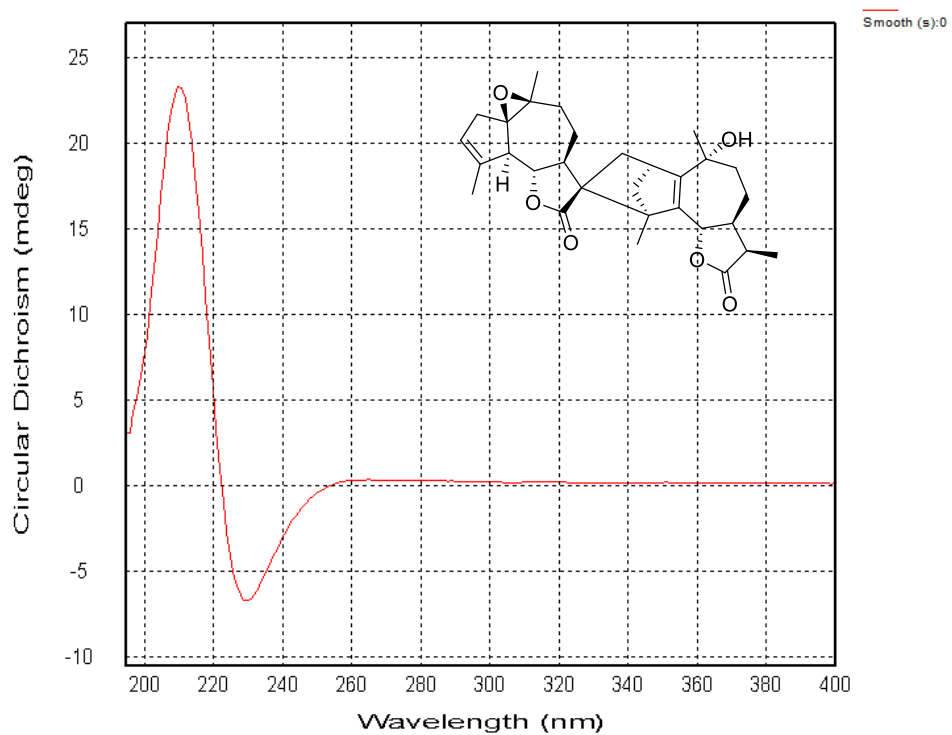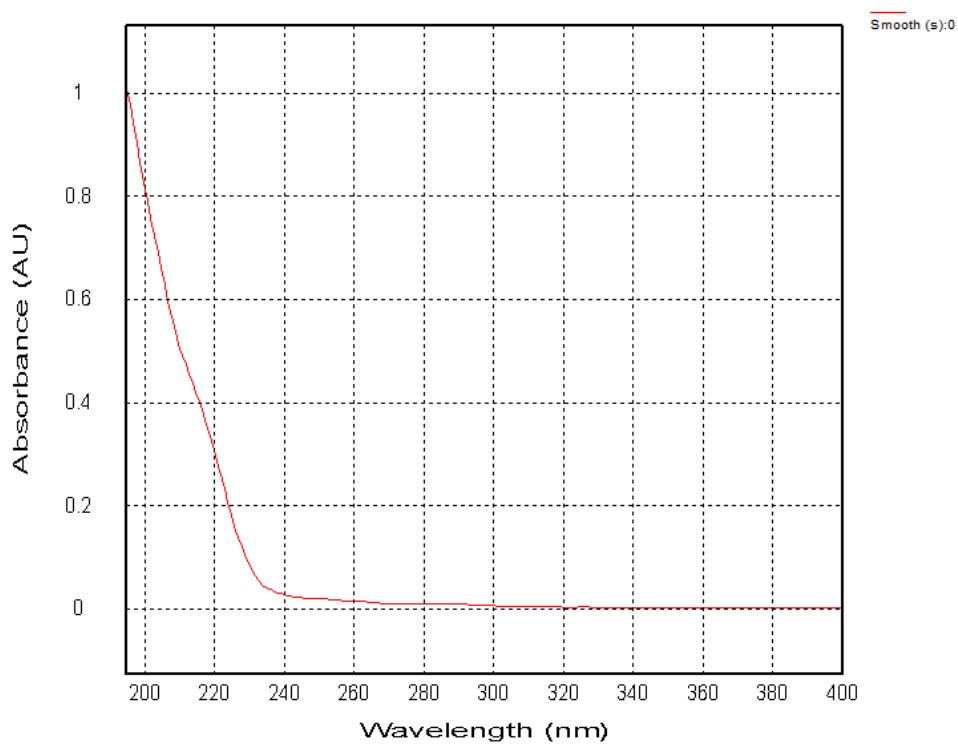

**Figure S90** CD (top) and UV (bottom) spectra of lavandiolide J (**9**).

## 11. NMR, MS, IR, $[\alpha]_D$ and CD spectra of compound 10

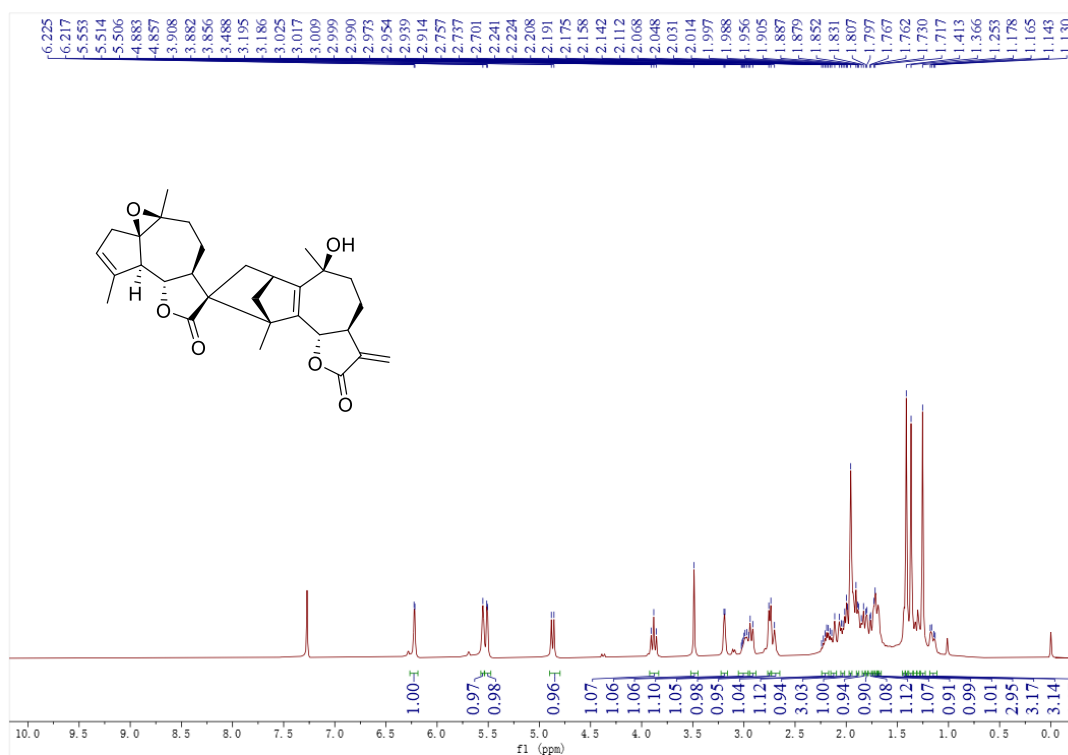

Figure S91  $^1\text{H}$  NMR spectrum (400 MHz) of artematrolide G (10) in  $\text{CDCl}_3$ .

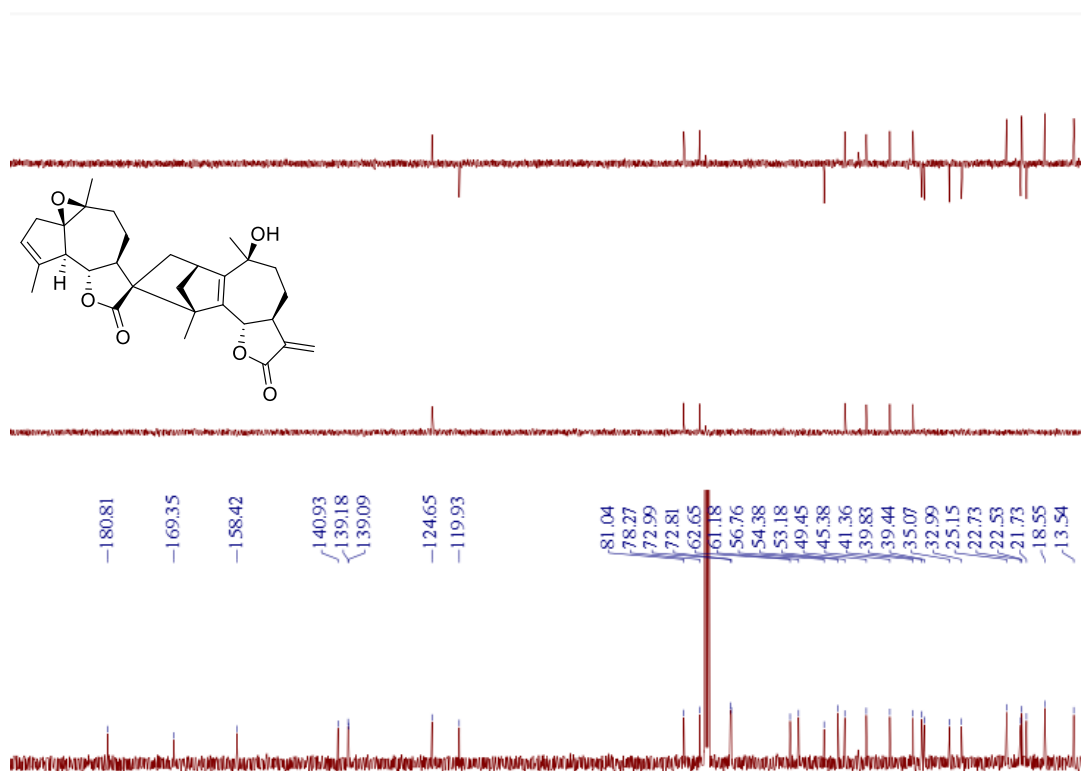

Figure S92  $^{13}\text{C}$  NMR spectrum (100 MHz) of artematrolide G (10) in  $\text{CDCl}_3$ .

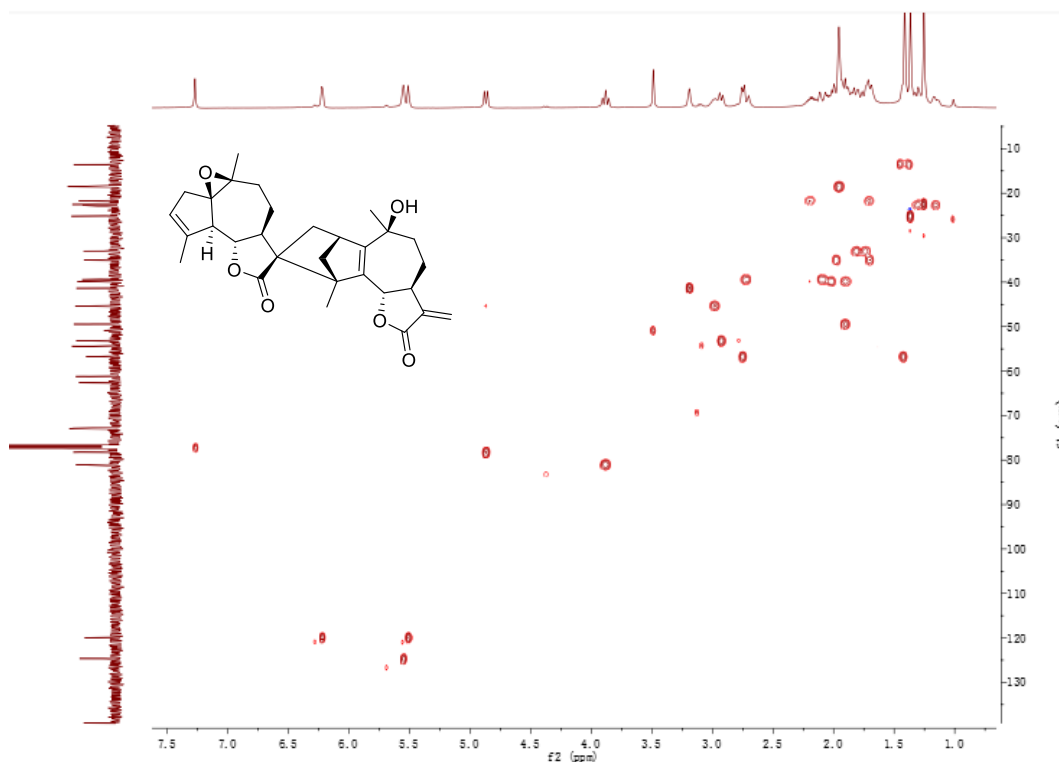

Figure S93 HSQC spectrum (600 MHz) of artematrolide G (10) in CDCl<sub>3</sub>.

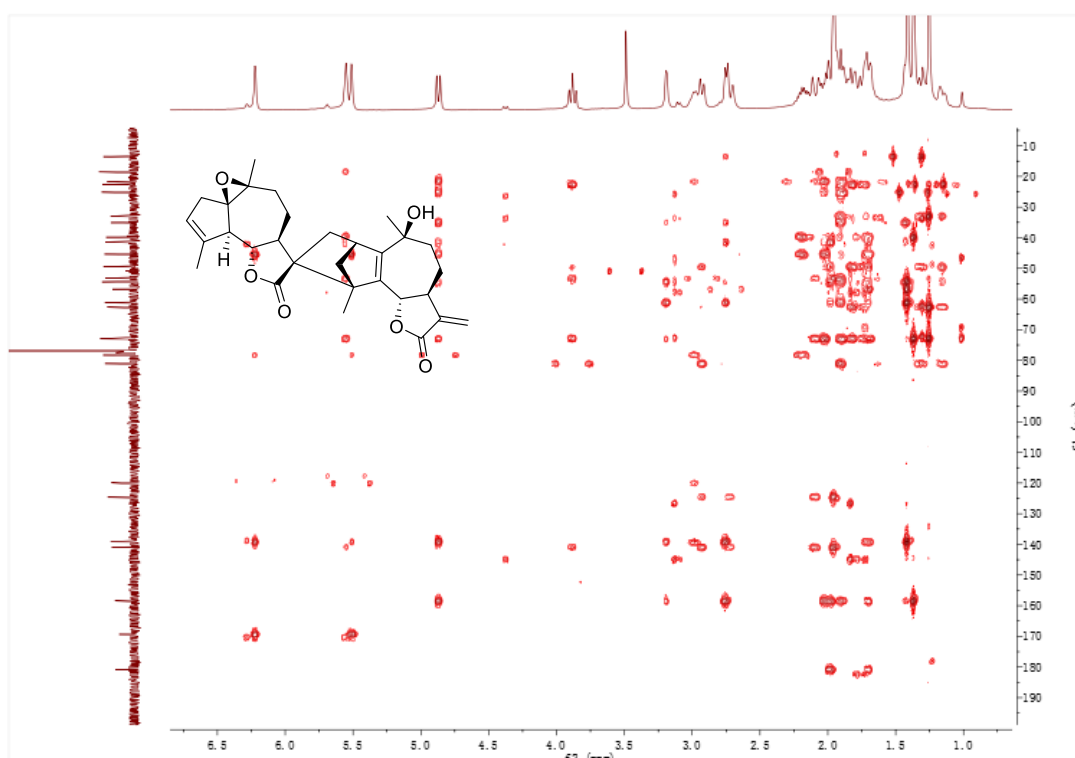

Figure S94 HMBC spectrum (600 MHz) of artematrolide G (10) in CDCl<sub>3</sub>.

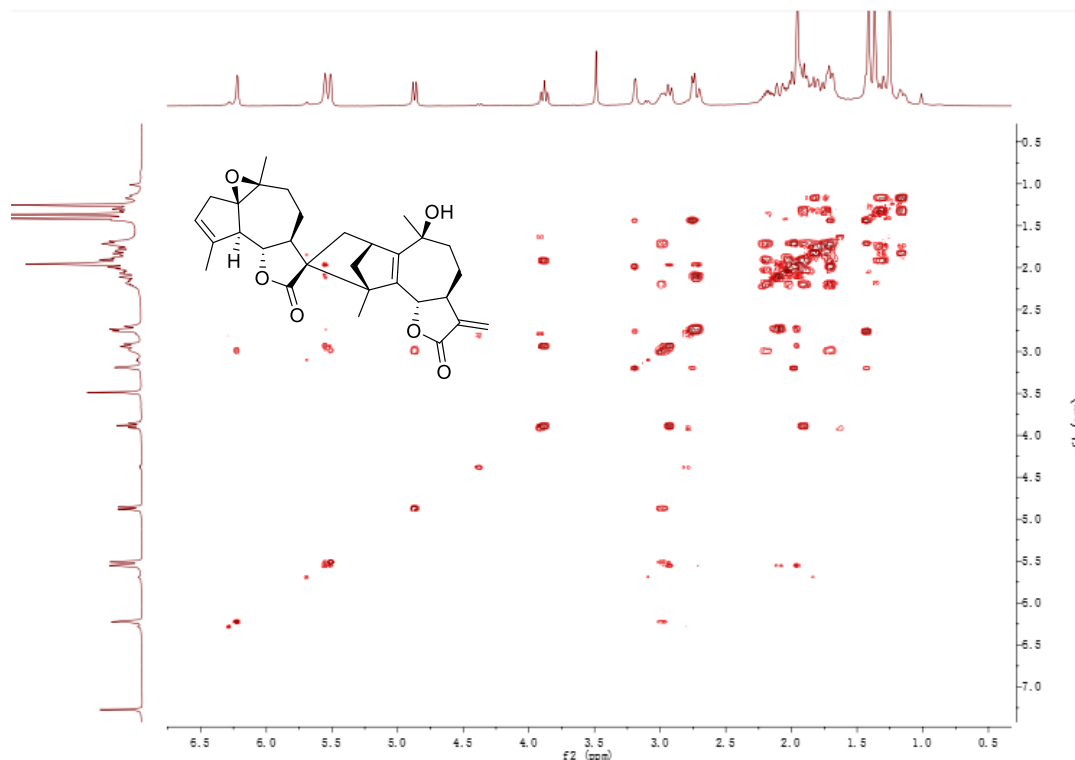

**Figure S95**  $^1\text{H}$ - $^1\text{H}$  COSY spectrum (600 MHz) of artematrolide G (**10**) in  $\text{CDCl}_3$ .

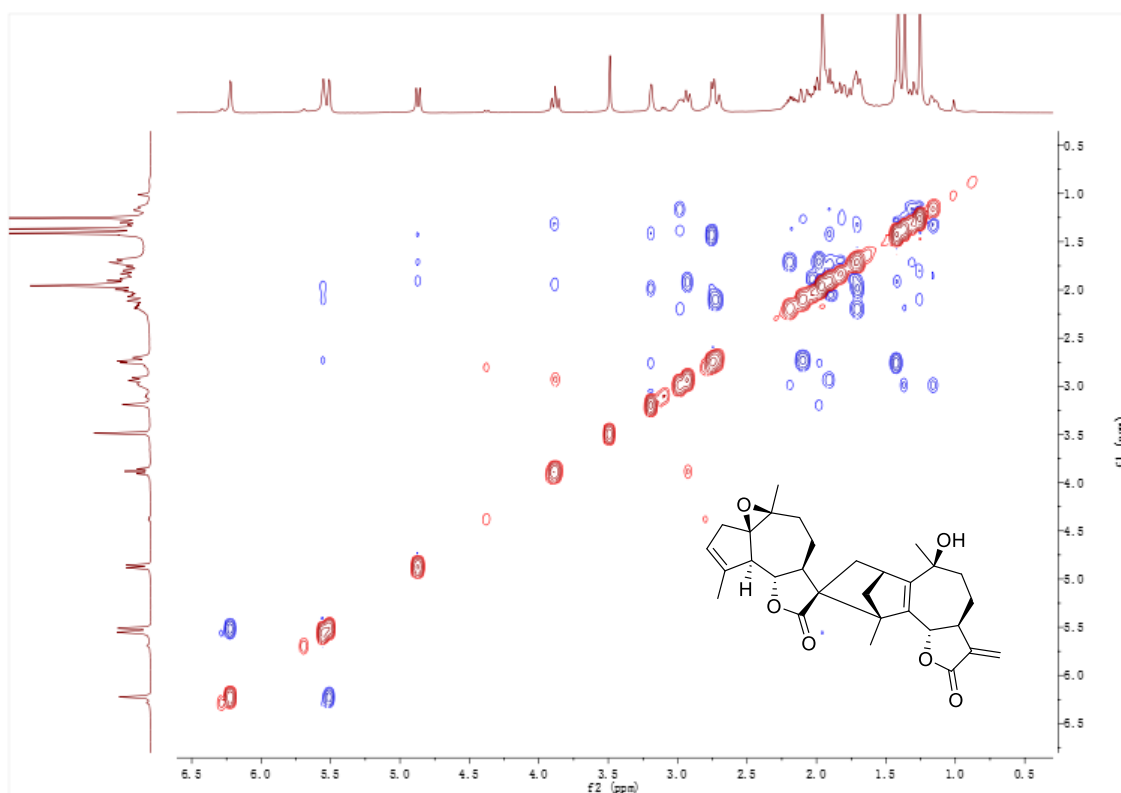

**Figure S96** ROESY spectrum (600 MHz) of artematrolide G (**10**) in  $\text{CDCl}_3$ .

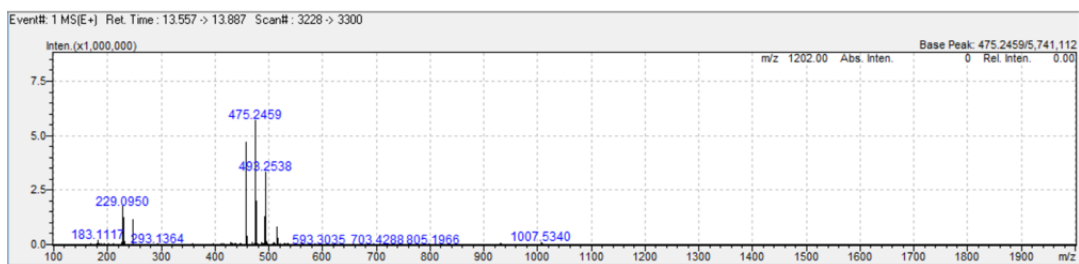

Figure S97 HRESIMS spectrum of artematrolide G (10).

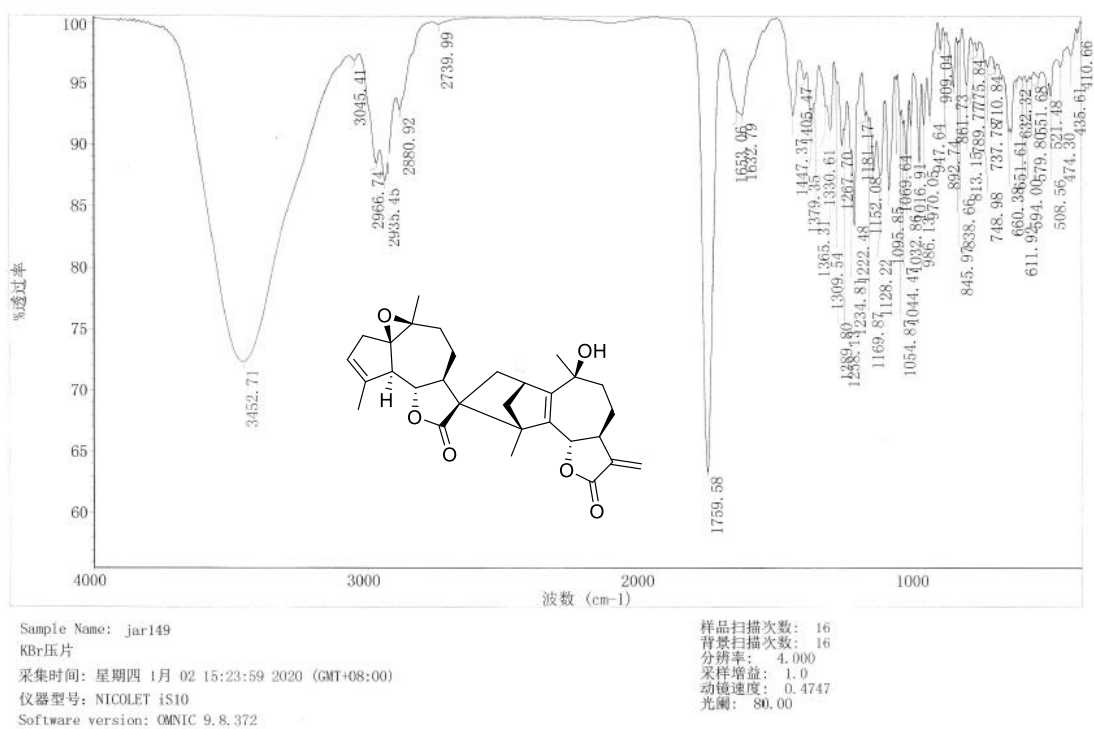

Figure S98 IR spectrum of artematrolide G (10).

**Rudolph Research Analytical**

This sample was measured on an Autopol VI, Serial #91058  
 Manufactured by Rudolph Research Analytical, Hackettstown, NJ, USA.

Measurement Date : Thursday, 19-DEC-2019

Set Temperature : OFF

Time Delay : Disabled

Delay between Measurement : Disabled

| n | Average | Std.Dev. | % RSD | Maximum | Minimum |
|---|---------|----------|-------|---------|---------|
| 5 | 77.23   | 0.75     | 0.97  | 77.87   | 75.96   |

| S.No | Sample ID | Time        | Result | Scale | OR °Arc | WLG.nm | Lg.mm  | Conc.g/100ml | Temp. |
|------|-----------|-------------|--------|-------|---------|--------|--------|--------------|-------|
| 1    | jar149    | 03:17:14 PM | 75.96  | SR    | 0.0357  | 589    | 100.00 | 0.047        | 20.9  |
| 2    | jar149    | 03:17:22 PM | 77.45  | SR    | 0.0364  | 589    | 100.00 | 0.047        | 20.9  |
| 3    | jar149    | 03:17:30 PM | 77.87  | SR    | 0.0366  | 589    | 100.00 | 0.047        | 20.9  |
| 4    | jar149    | 03:17:39 PM | 77.23  | SR    | 0.0363  | 589    | 100.00 | 0.047        | 20.9  |
| 5    | jar149    | 03:17:47 PM | 77.66  | SR    | 0.0365  | 589    | 100.00 | 0.047        | 20.9  |

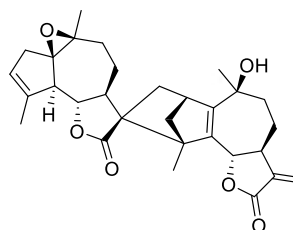

Figure S99 Optical rotation spectrum of artematrolide G (10).

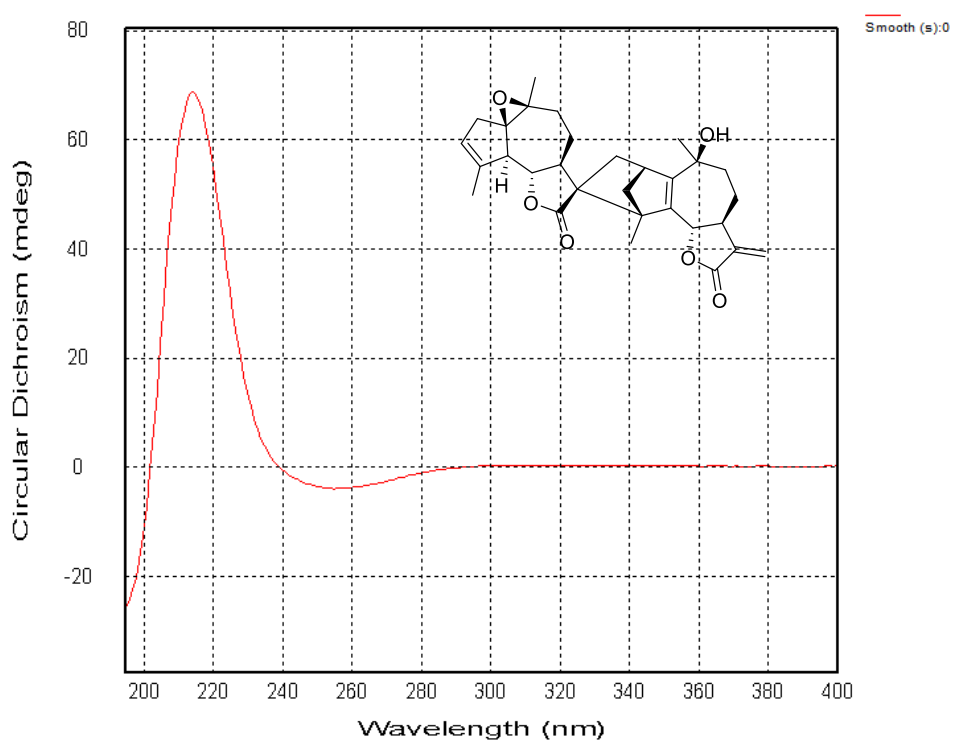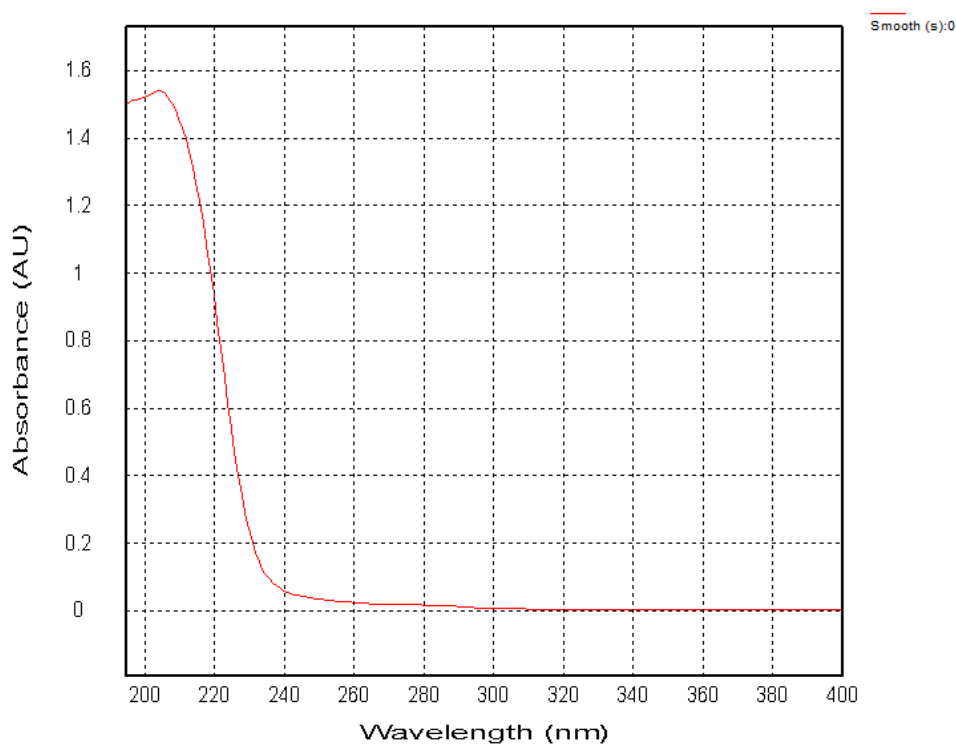

**Figure S100** CD (top) and UV (bottom) spectra of artematrolide G (**10**).

## 12. NMR, MS, IR, $[\alpha]_D$ and CD spectra of compound 11

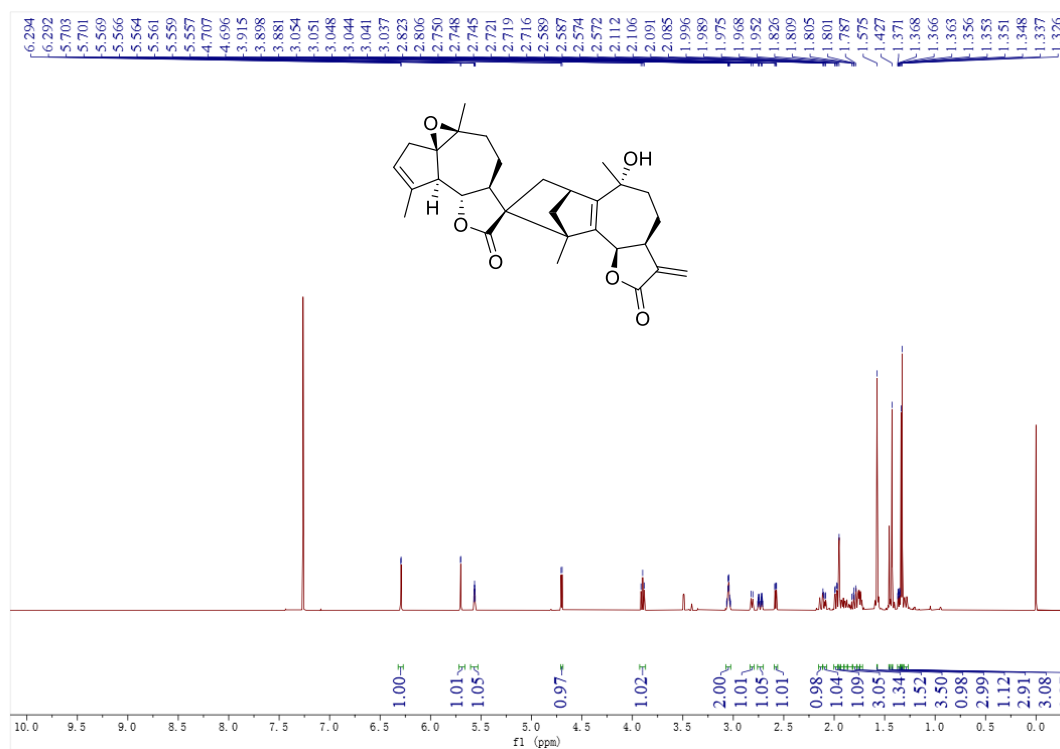

**Figure S101**  $^1\text{H}$  NMR spectrum (600 MHz) of artematrolide H (**11**) in  $\text{CDCl}_3$ .

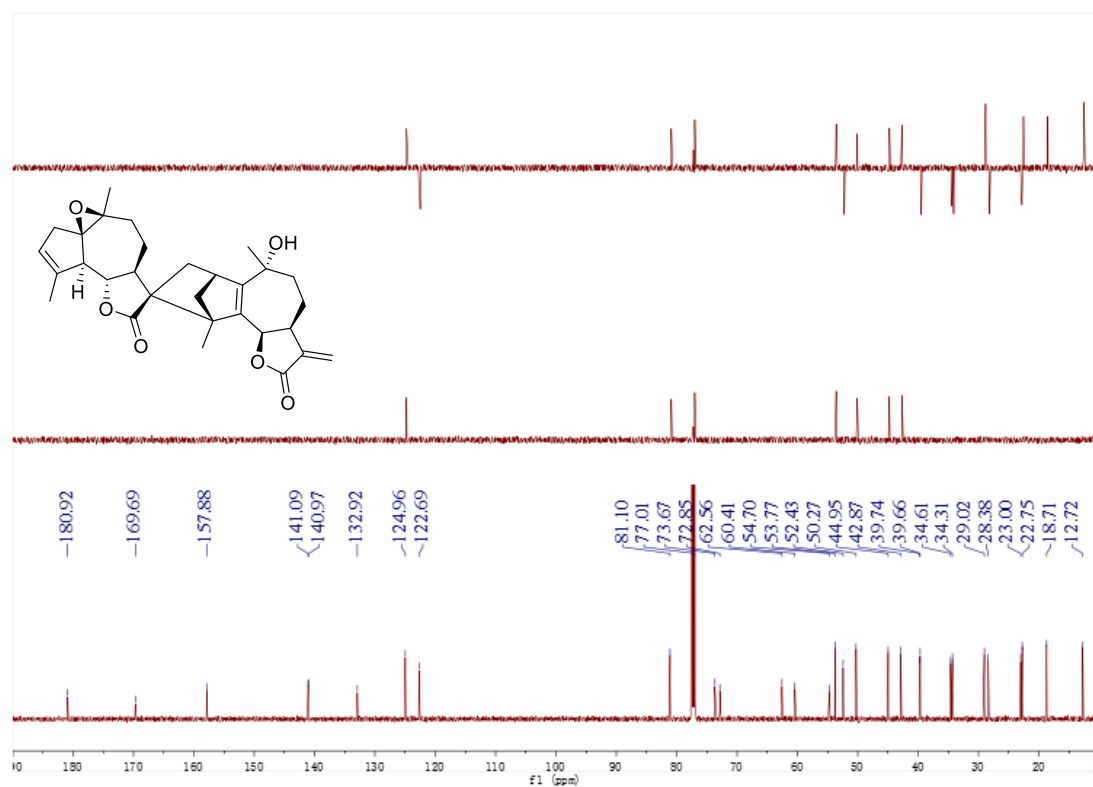

**Figure S102**  $^{13}\text{C}$  NMR spectrum (150 MHz) of artematrolide H (**11**) in  $\text{CDCl}_3$ .

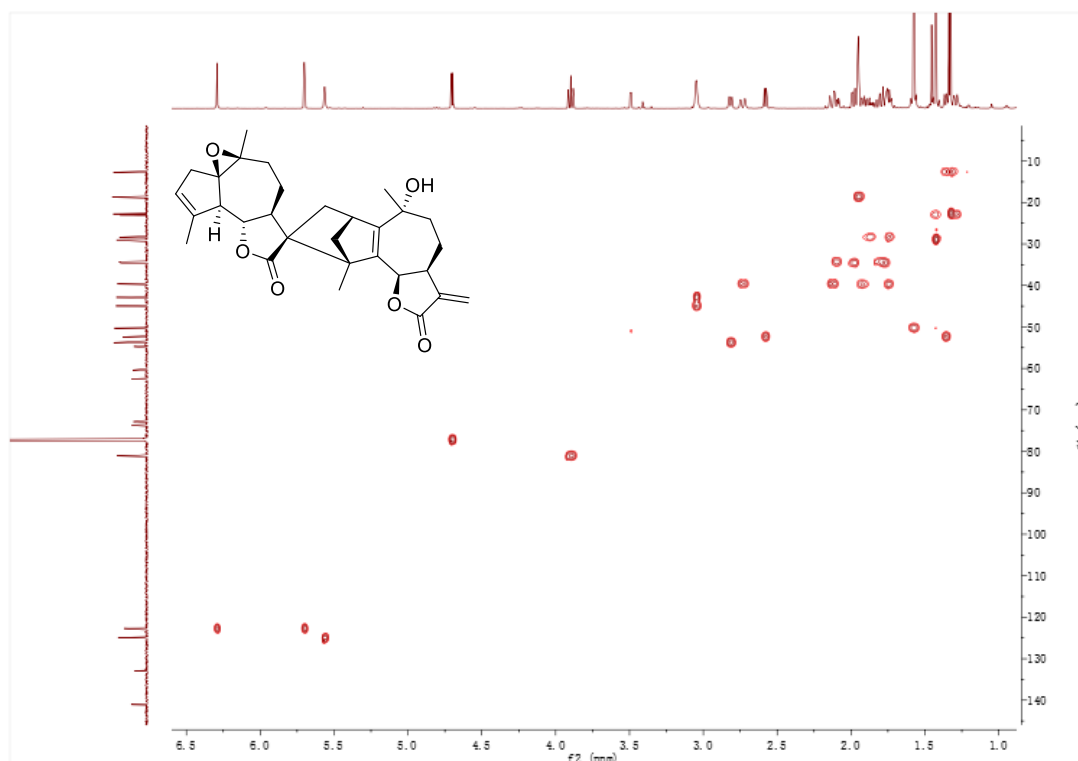

**Figure S103** HSQC spectrum (600 MHz) of artematrolide H (**11**) in CDCl<sub>3</sub>.

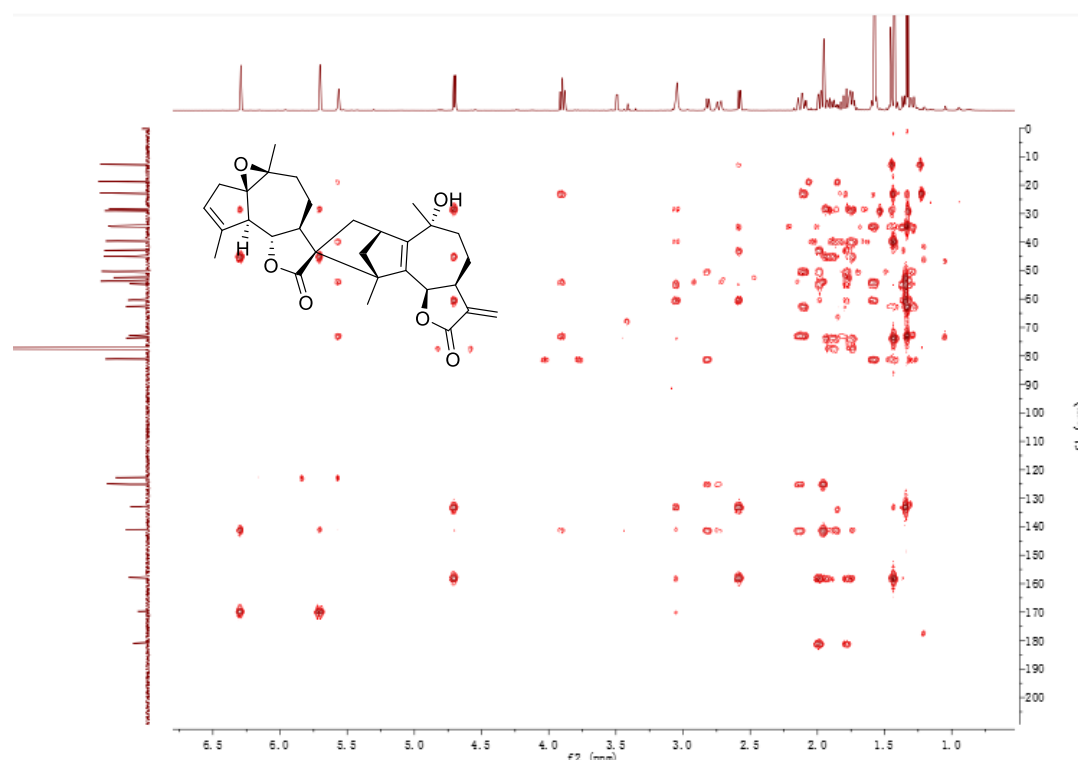

**Figure S104** HMBC spectrum (600 MHz) of artematrolide H (**11**) in CDCl<sub>3</sub>.



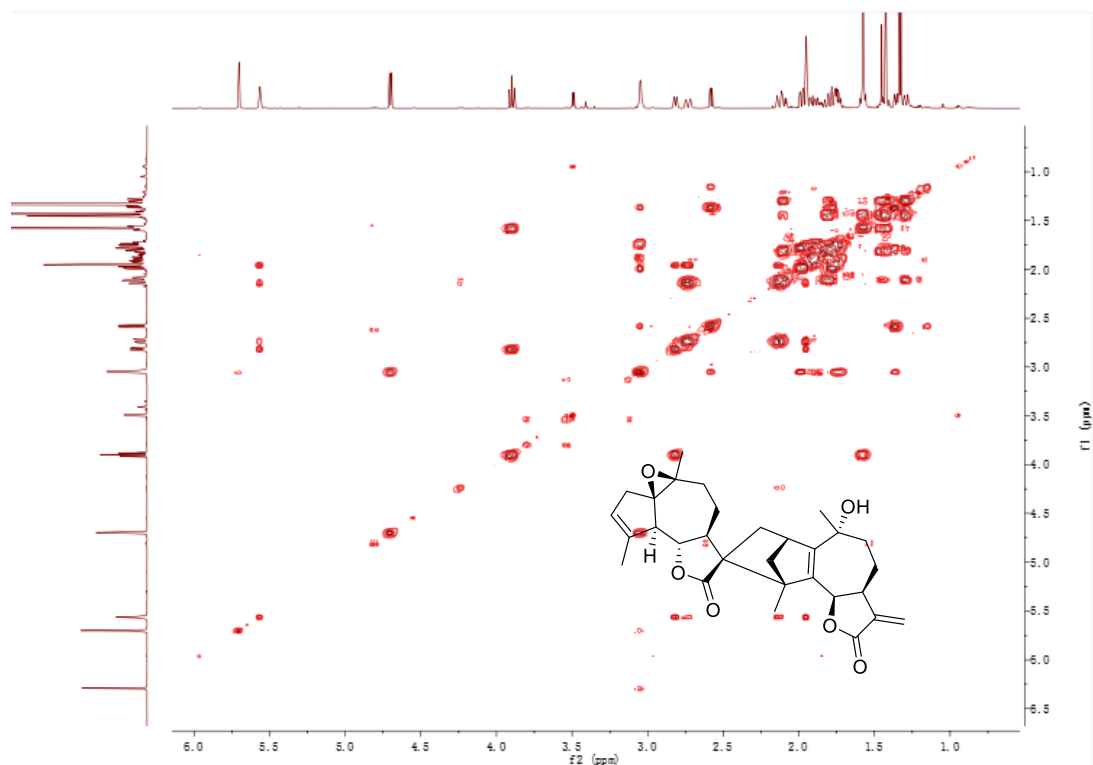

**Figure S105**  $^1\text{H}$ - $^1\text{H}$  COSY spectrum (600 MHz) of artematrolide H (**11**) in  $\text{CDCl}_3$ .

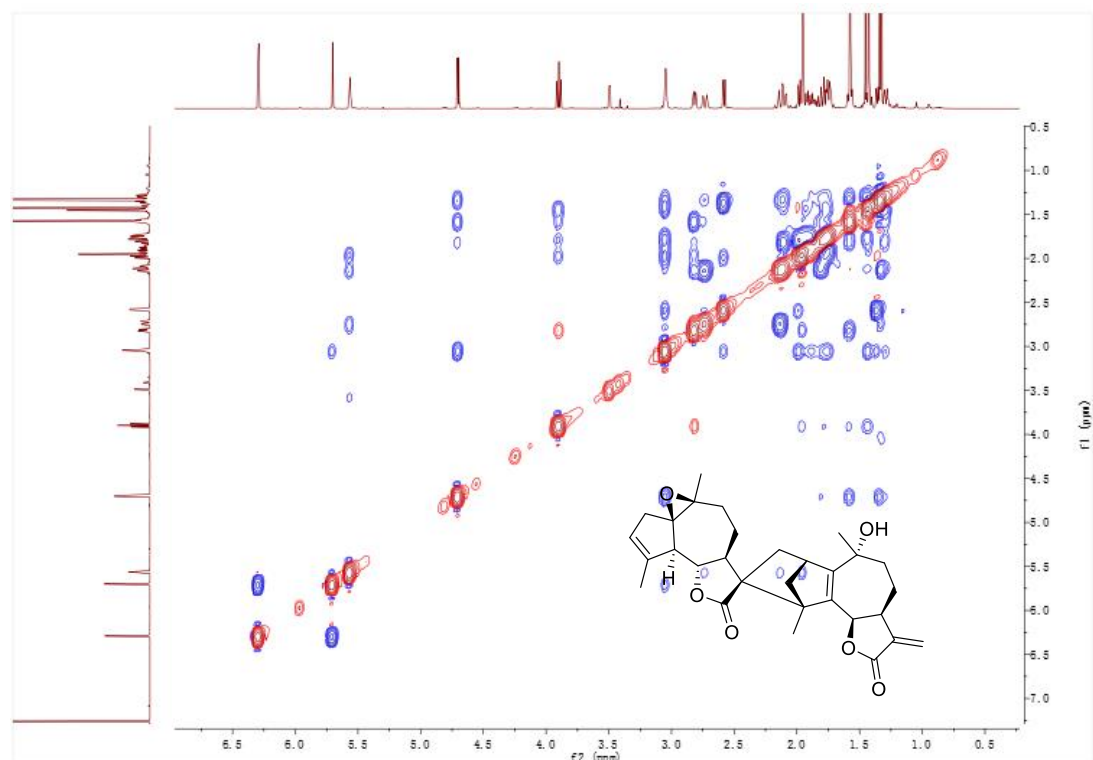

**Figure S106** ROESY spectrum (600 MHz) of artematrolide H (**11**) in  $\text{CDCl}_3$ .

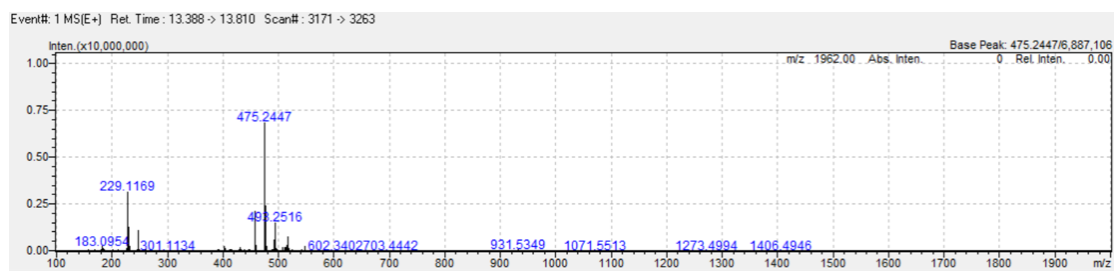

Figure S107 HRESIMS spectrum of artematrolide H (11).

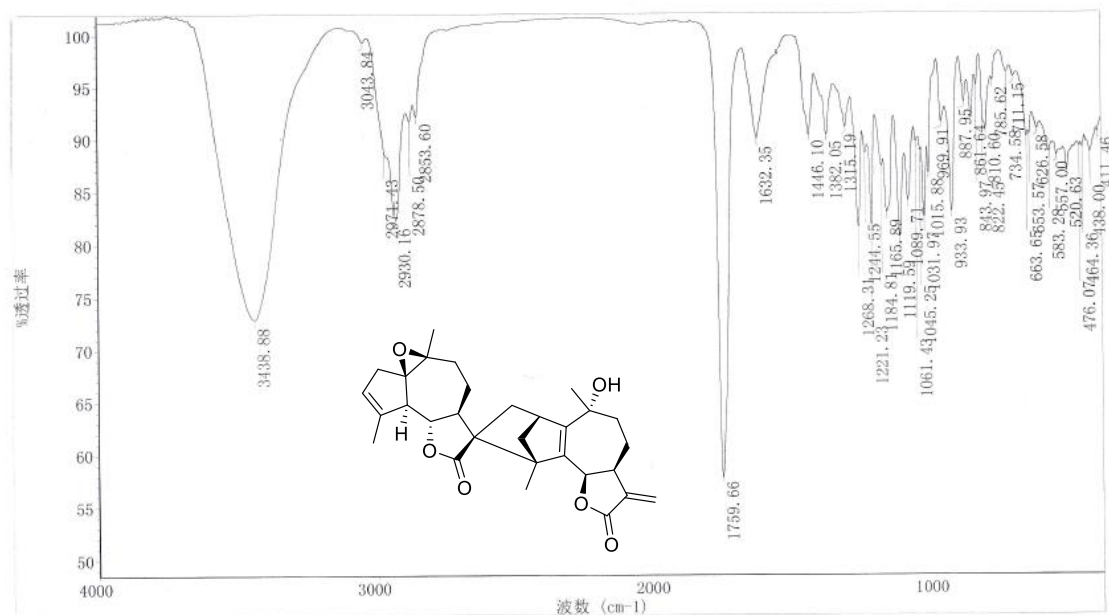

Sample Name: jar148-1  
KBr压片  
采集时间: 星期一 1月 13 15:59:48 2020 (GMT+08:00)  
仪器型号: NICOLET iS10  
Software version: OMNIC 9.8.372

样品扫描次数: 16  
背景扫描次数: 16  
分辨率: 4.000  
采样增益: 1.0  
动镜速度: 0.4747  
光阑: 80.00

Figure S108 IR spectrum of artematrolide H (11).

**Rudolph Research Analytical**

This sample was measured on an Autopol VI, Serial #91058  
Manufactured by Rudolph Research Analytical, Hackettstown, NJ, USA.

Measurement Date : Monday, 07-SEP-2020

Set Temperature : OFF

Time Delay : Disabled

Delay between Measurement : Disabled

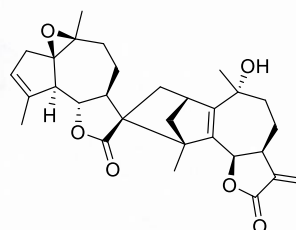

| $n$ | Average | Std.Dev. | % RSD | Maximum | Minimum |
|-----|---------|----------|-------|---------|---------|
| 5   | 37.00   | 4.08     | 11.02 | 43.50   | 34.00   |

| S.No | Sample ID | Time        | Result | Scale | OR °Arc | WLG.nm | Lg.mm  | Conc.g/100ml | Temp. |
|------|-----------|-------------|--------|-------|---------|--------|--------|--------------|-------|
| 1    | JAR148-1  | 04:44:25 PM | 43.50  | SR    | 0.0087  | 589    | 100.00 | 0.020        | 24.9  |
| 2    | JAR148-1  | 04:44:33 PM | 38.50  | SR    | 0.0077  | 589    | 100.00 | 0.020        | 24.9  |
| 3    | JAR148-1  | 04:44:41 PM | 35.00  | SR    | 0.0070  | 589    | 100.00 | 0.020        | 24.9  |
| 4    | JAR148-1  | 04:44:49 PM | 34.00  | SR    | 0.0068  | 589    | 100.00 | 0.020        | 24.9  |
| 5    | JAR148-1  | 04:44:57 PM | 34.00  | SR    | 0.0068  | 589    | 100.00 | 0.020        | 24.9  |

Figure S109 Optical rotation spectrum of artematrolide H (11).

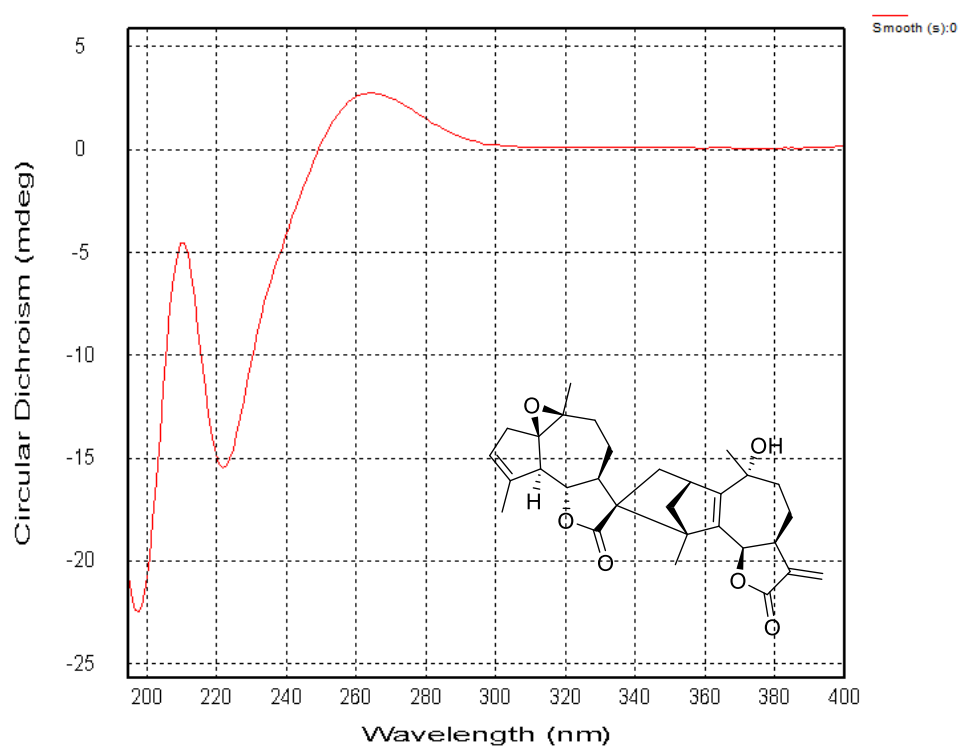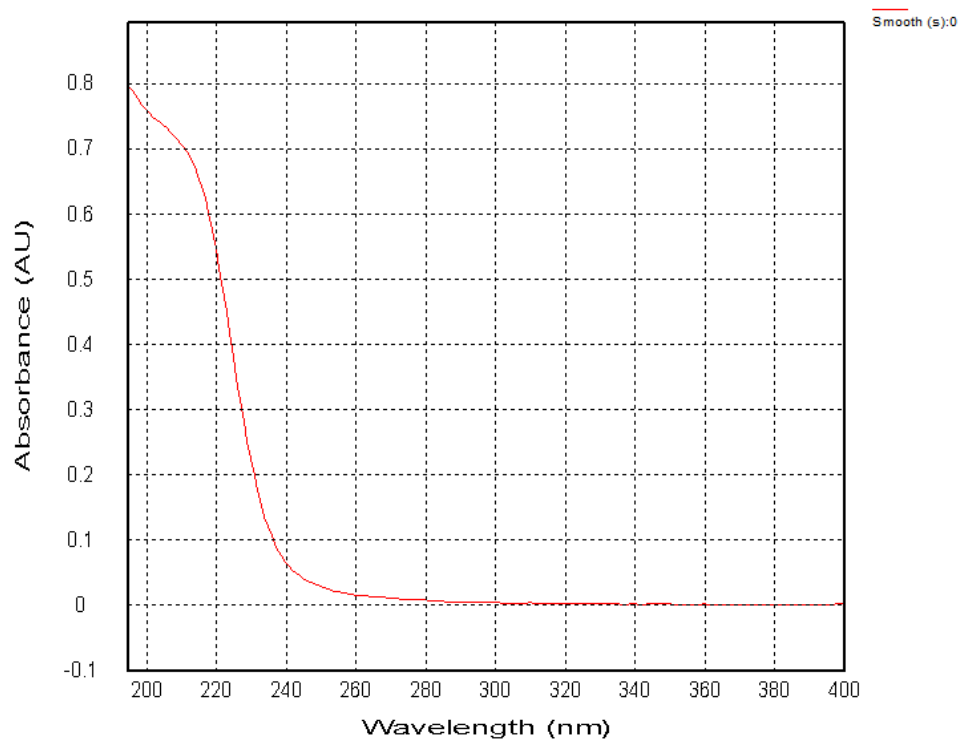

**Figure S110** CD (top) and UV (bottom) spectra of artematrolide H (**11**).

### 13. NMR, MS, IR, $[\alpha]_D$ and CD spectra of compound 12

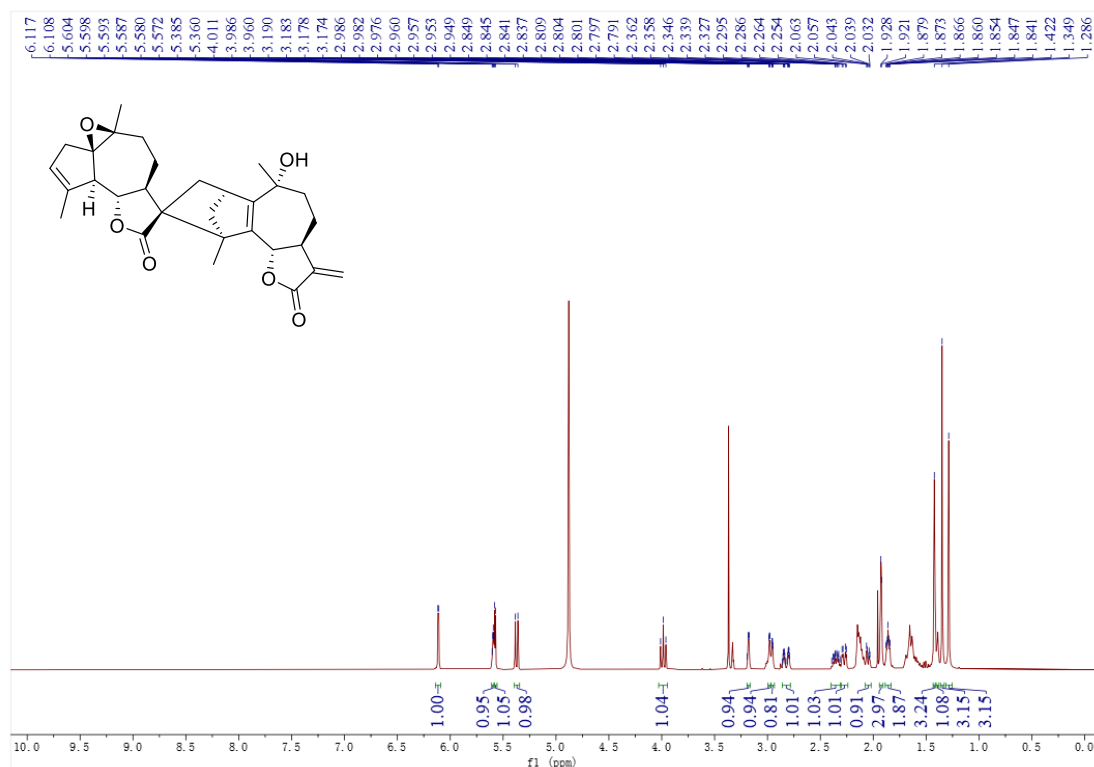

**Figure S111**  $^1\text{H}$  NMR spectrum (400 MHz) of lavandiolid H (**12**) in  $\text{CD}_3\text{OD}$ .

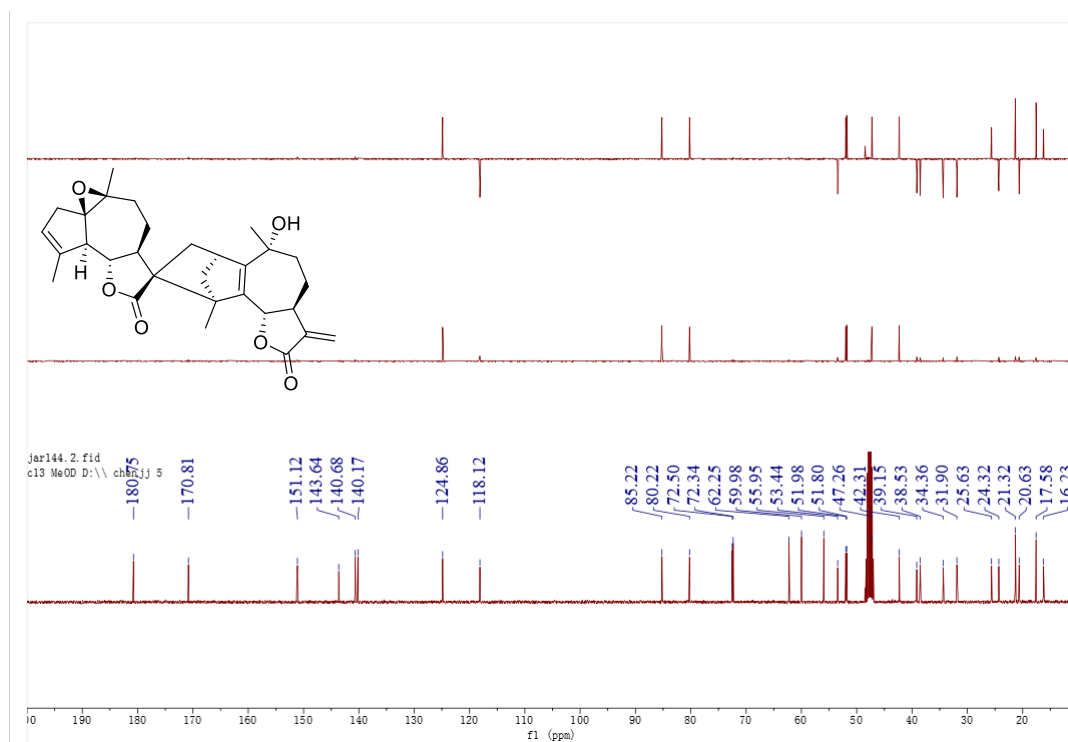

**Figure S112**  $^{13}\text{C}$  NMR spectrum (100 MHz) of lavandiolid H (**12**) in  $\text{CD}_3\text{OD}$ .

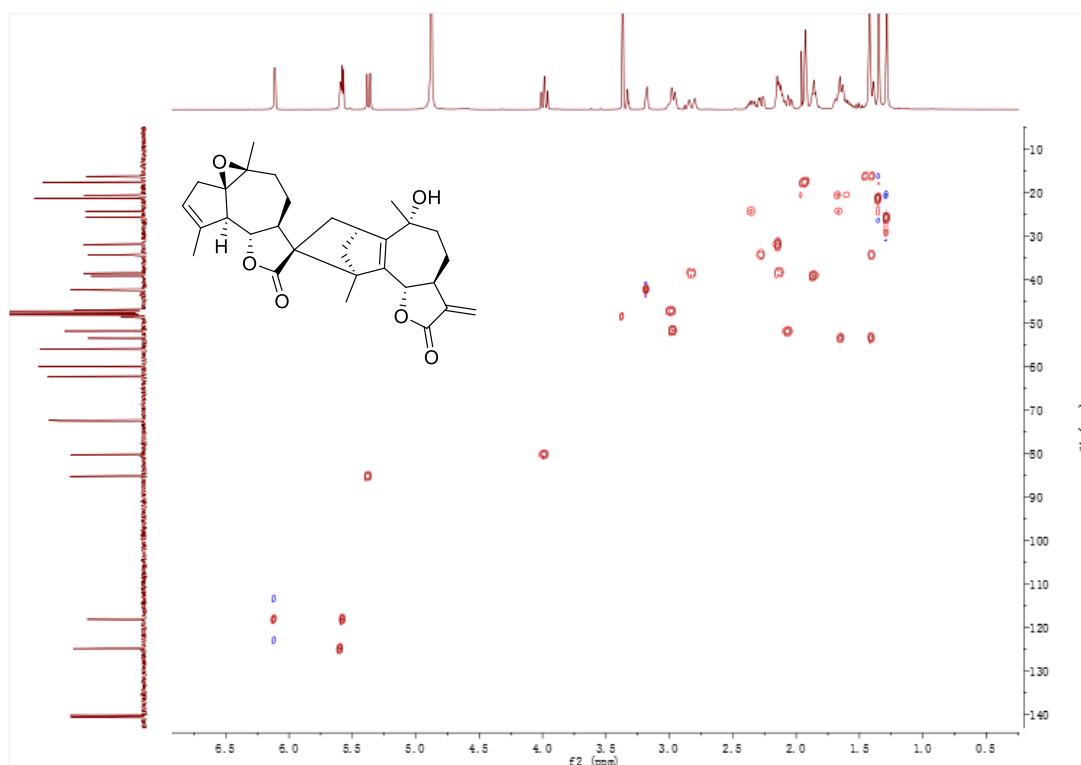

**Figure S113** HSQC spectrum (600 MHz) of lavandiolide H (**12**) in CD<sub>3</sub>OD.

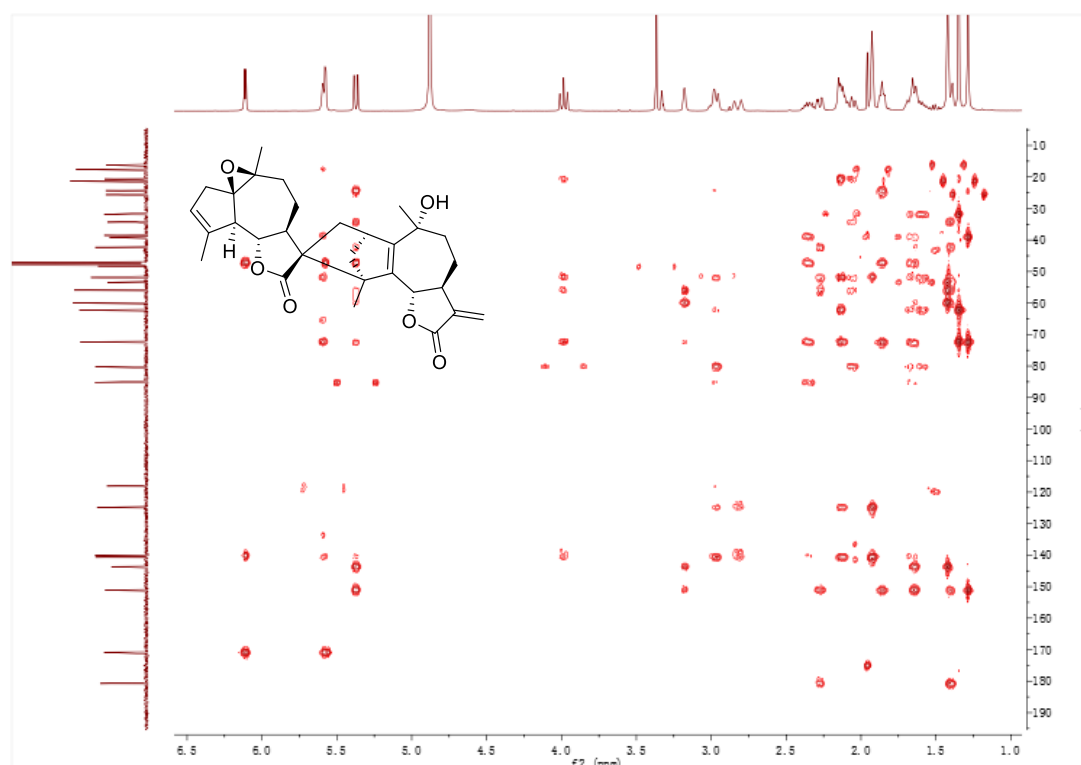

**Figure S114** HMBC spectrum (600 MHz) of lavandiolide H (**12**) in CD<sub>3</sub>OD.

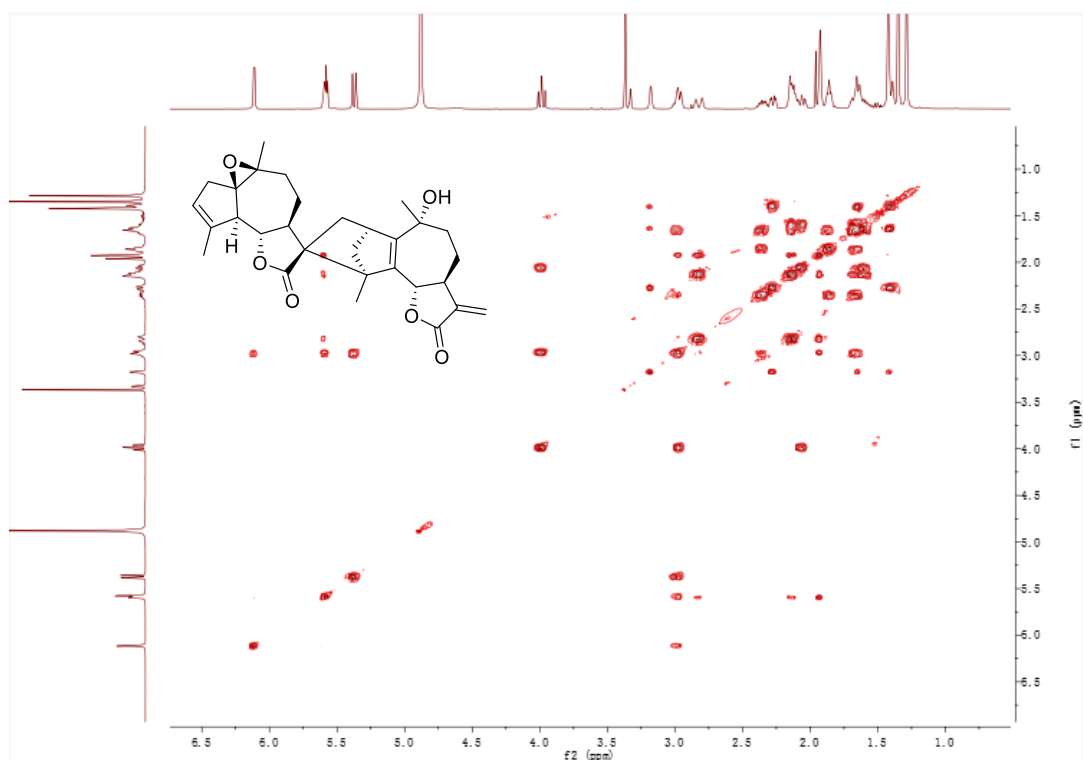

**Figure S115**  $^1\text{H}$ - $^1\text{H}$  COSY spectrum (600 MHz) of lavandiolid H (**12**) in  $\text{CD}_3\text{OD}$ .

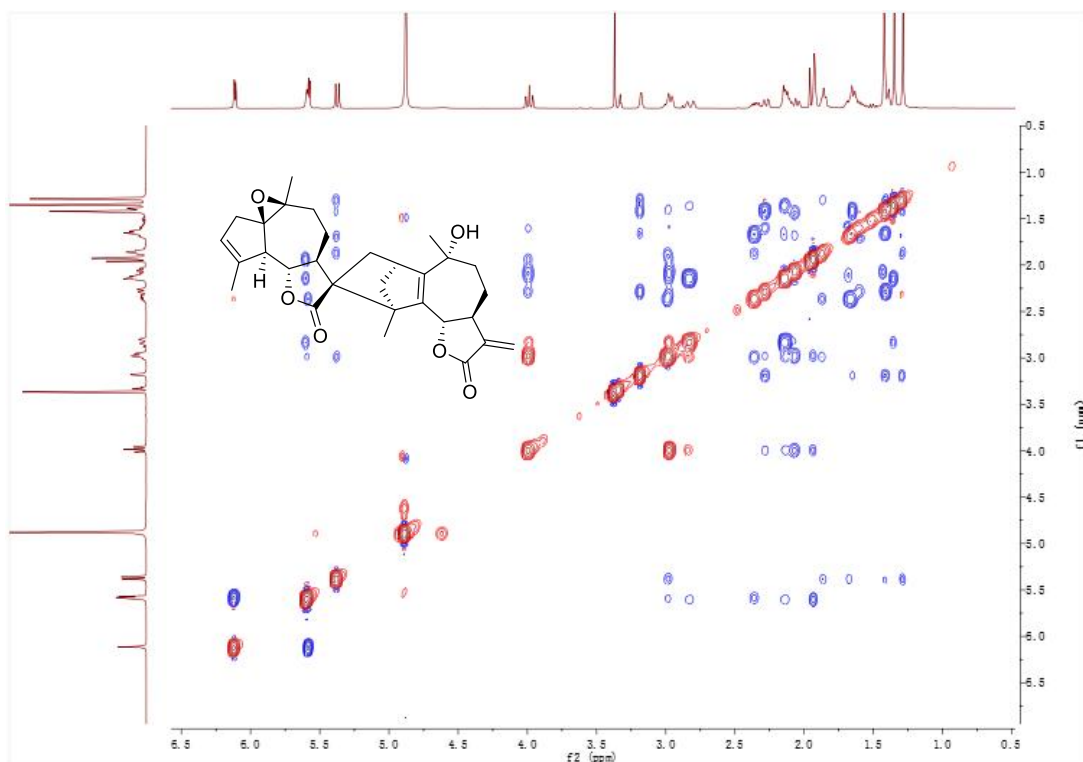

**Figure S116** ROESY spectrum (600 MHz) of lavandiolid H (**12**) in  $\text{CD}_3\text{OD}$ .

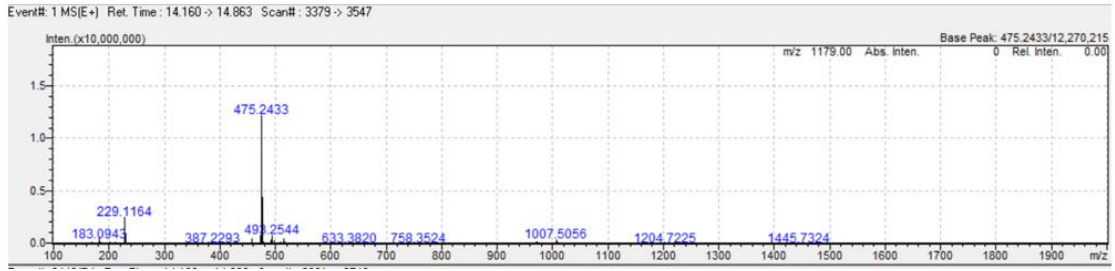

Figure S117 HRESIMS spectrum of lavandiolid H (12).

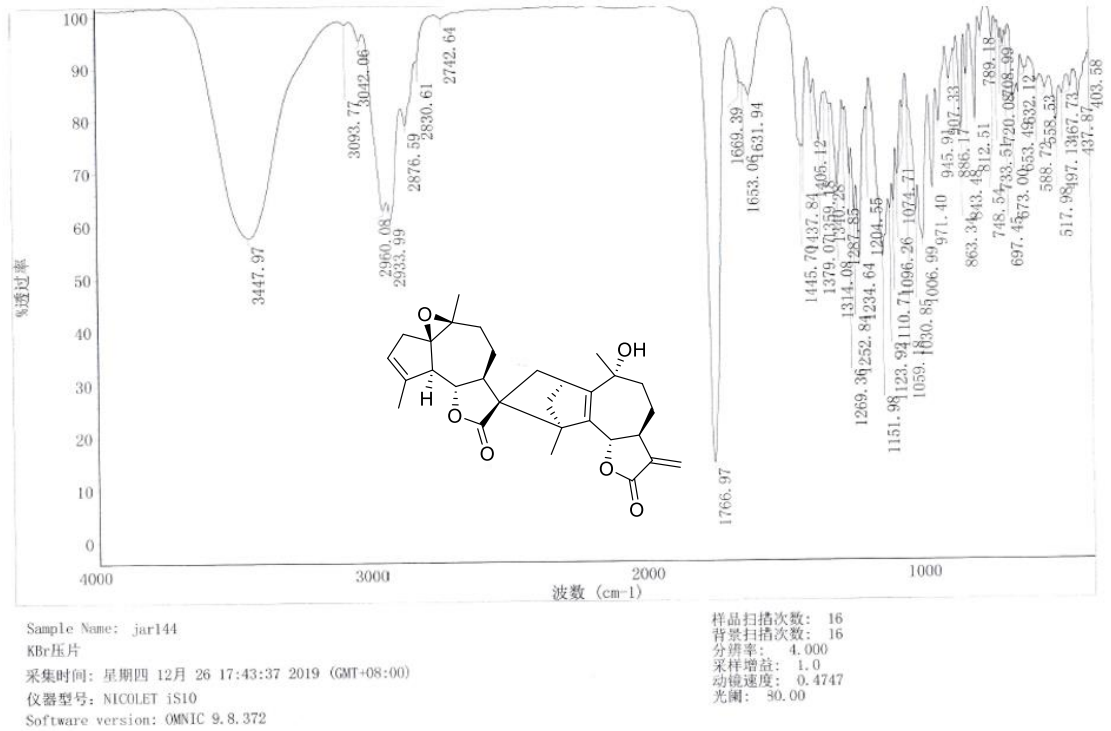

Figure S118 IR spectrum of lavandiolid H (12).

**Rudolph Research Analytical**

This sample was measured on an Autopol VI, Serial #91058  
Manufactured by Rudolph Research Analytical, Hackettstown, NJ, USA.  
Measurement Date : Friday, 13-DEC-2019  
Set Temperature : OFF  
Time Delay : Disabled  
Delay between Measurement : Disabled

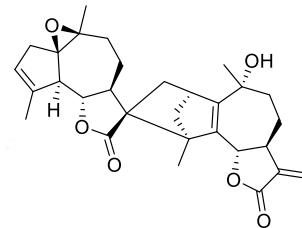

| S.No | Sample ID | Time        | Result | Scale | OR °Arc | WLG.nm | Lg.mm  | Conc.g/100ml | Temp. |
|------|-----------|-------------|--------|-------|---------|--------|--------|--------------|-------|
|      |           |             |        |       |         |        |        |              |       |
| 1    | jar144    | 04:50:04 PM | 74.13  | SR    | 0.1186  | 589    | 100.00 | 0.160        | 23.5  |
| 2    | jar144    | 04:50:13 PM | 74.19  | SR    | 0.1187  | 589    | 100.00 | 0.160        | 23.5  |
| 3    | jar144    | 04:50:21 PM | 74.69  | SR    | 0.1195  | 589    | 100.00 | 0.160        | 23.5  |
| 4    | jar144    | 04:50:29 PM | 74.69  | SR    | 0.1195  | 589    | 100.00 | 0.160        | 23.5  |
| 5    | jar144    | 04:50:37 PM | 74.94  | SR    | 0.1199  | 589    | 100.00 | 0.160        | 23.5  |

Figure S119 Optical rotation spectrum of lavandiolid H (12).

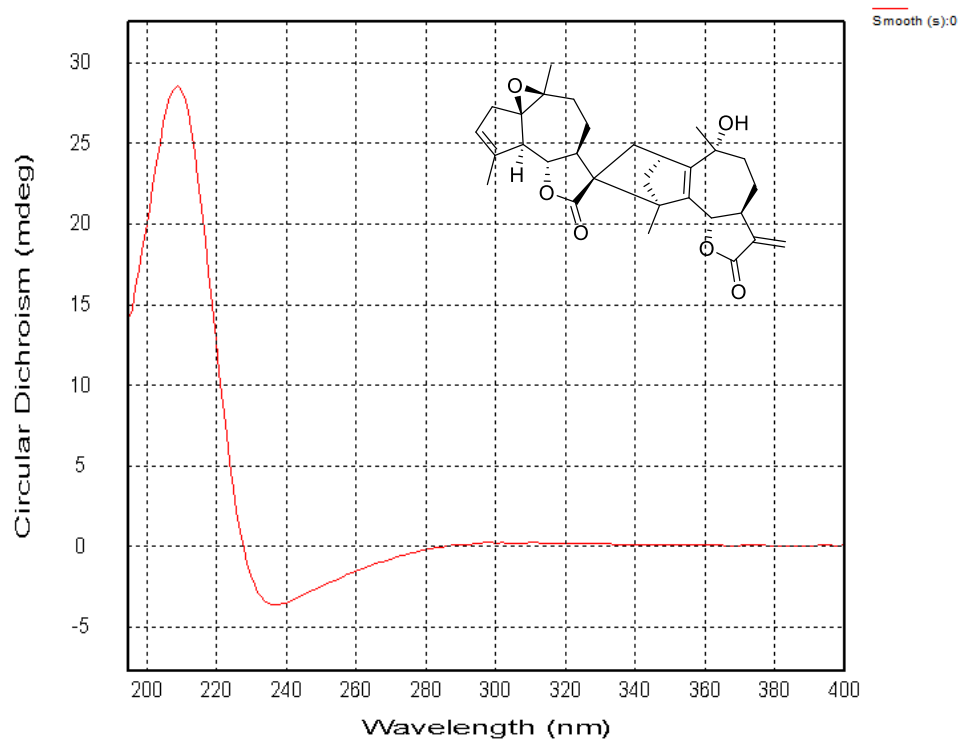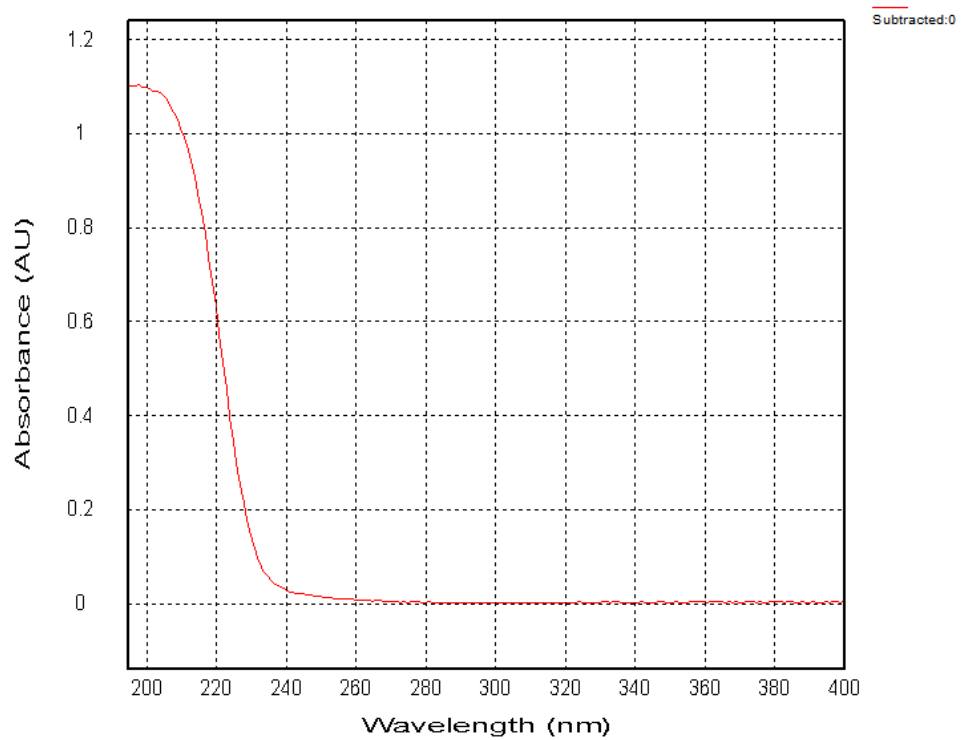

**Figure S120** CD (top) and UV (bottom) spectra of lavandiolide H (**12**).



## 14. NMR, MS, IR, $[\alpha]_D$ and CD spectra of compound 13

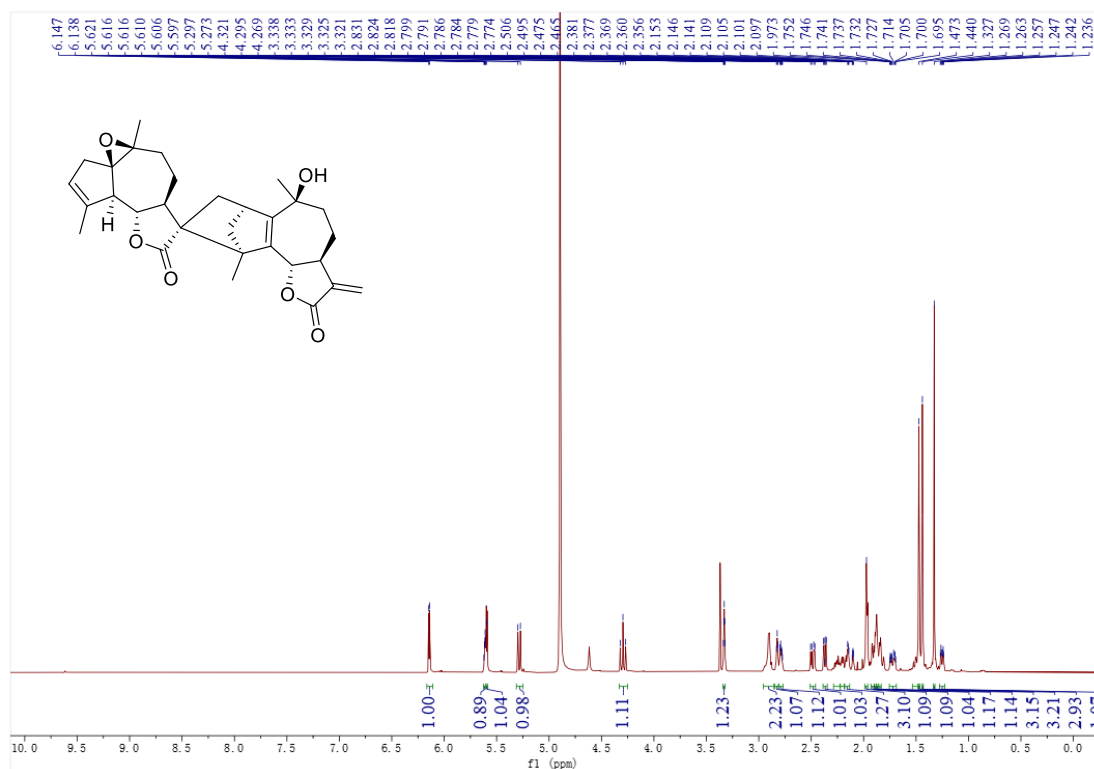

**Figure S121**  $^1\text{H}$  NMR spectrum (400 MHz) of artematrolide I (**13**) in  $\text{CD}_3\text{OD}$ .

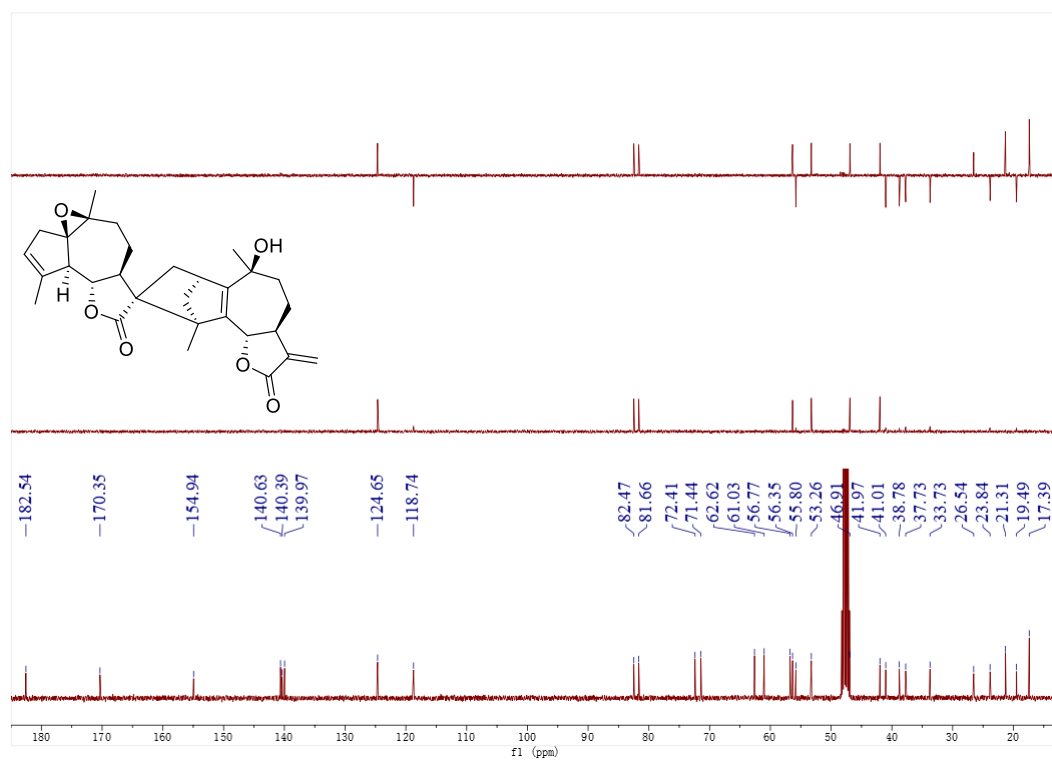

**Figure S122**  $^{13}\text{C}$  NMR spectrum (100 MHz) of artematrolide I (**13**) in  $\text{CD}_3\text{OD}$ .

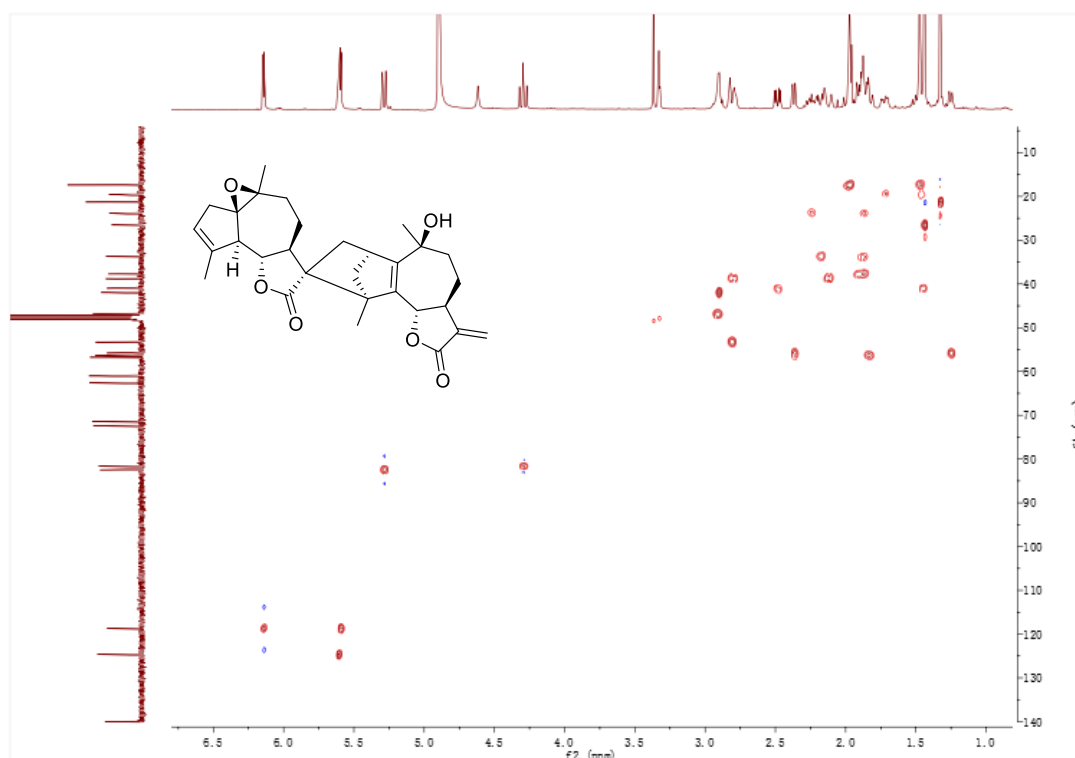

**Figure S123** HSQC spectrum (600 MHz) of artematrolide I (**13**) in CD<sub>3</sub>OD.

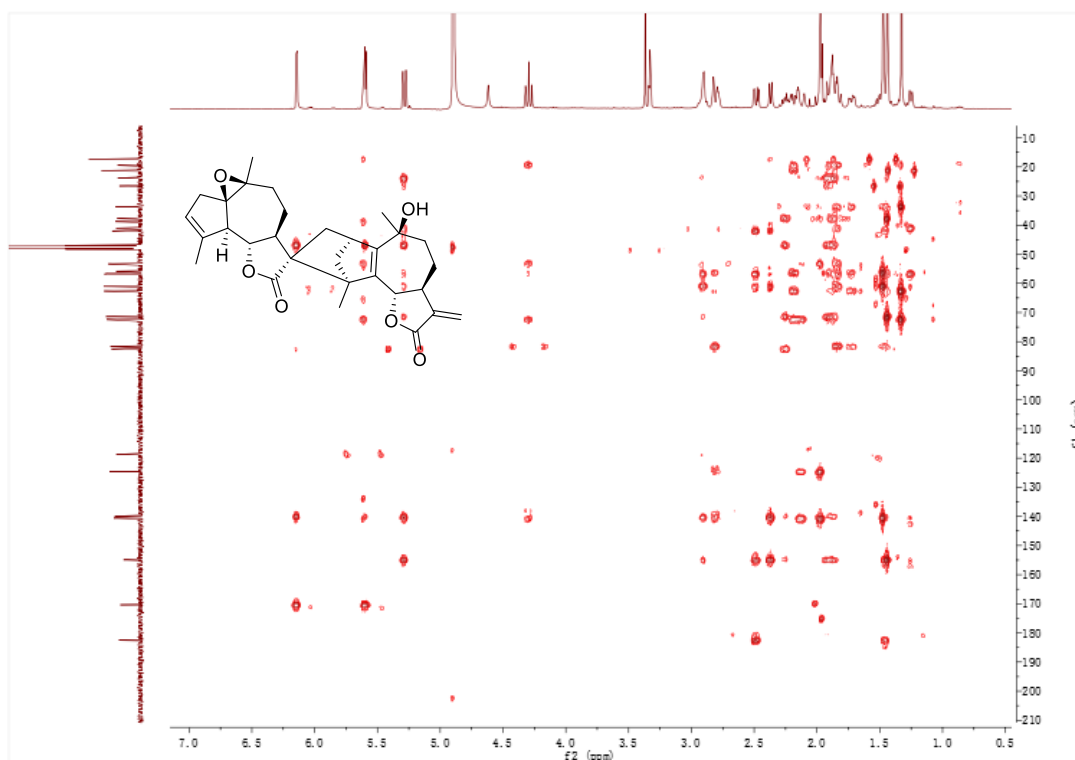

**Figure S124** HMBC spectrum (600 MHz) of artematrolide I (**13**) in CD<sub>3</sub>OD.

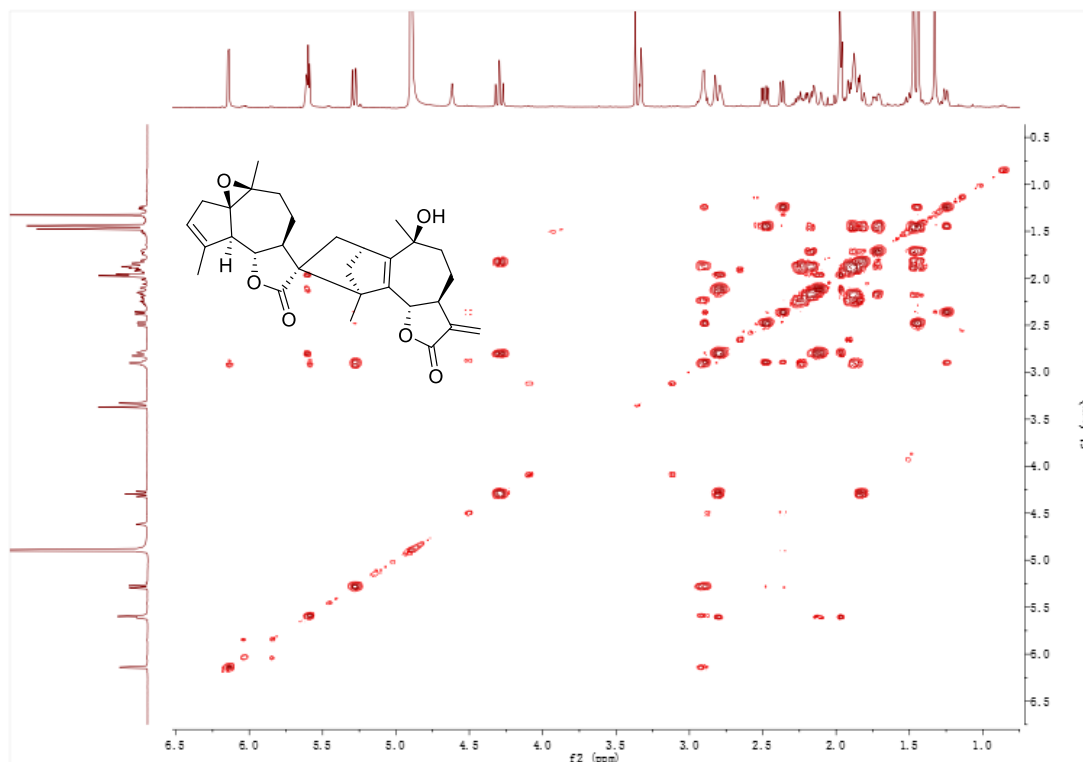

**Figure S125**  $^1\text{H}$ - $^1\text{H}$  COSY spectrum (600 MHz) of artematrolide I (**13**) in  $\text{CD}_3\text{OD}$ .

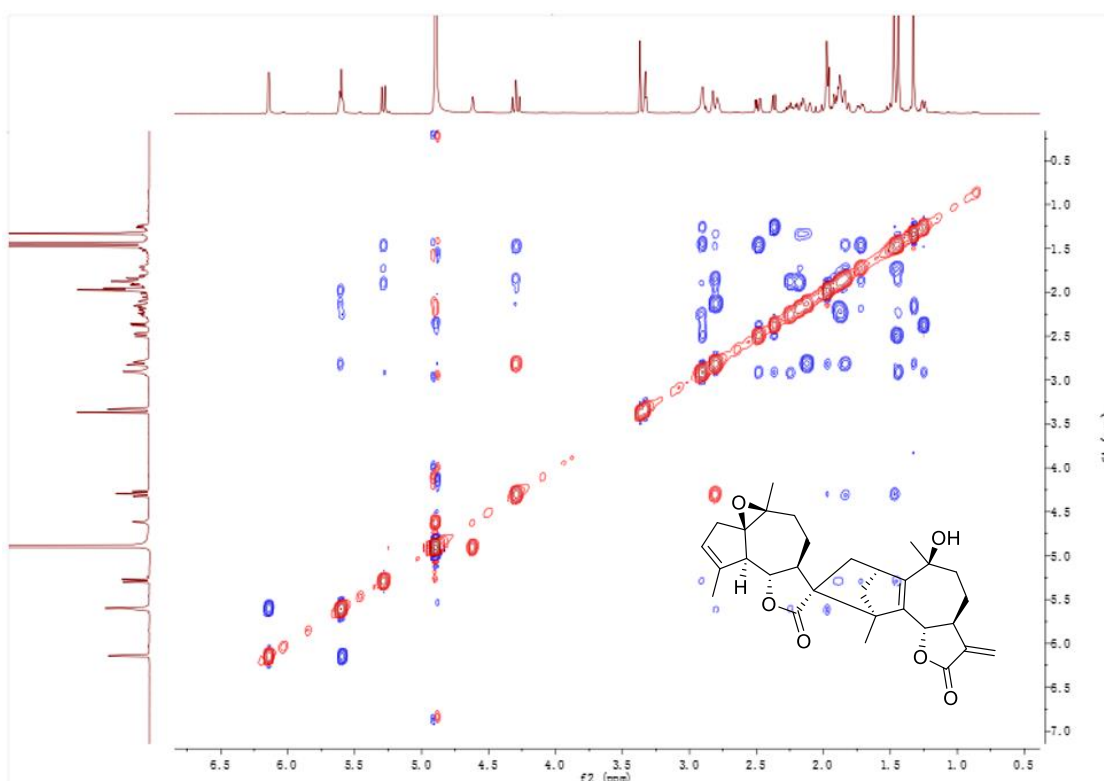

**Figure S126** ROESY spectrum (600 MHz) of artematrolide I (**13**) in  $\text{CD}_3\text{OD}$ .

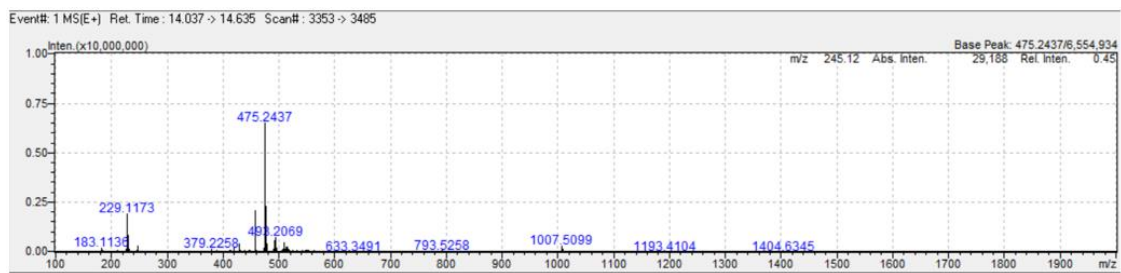

Figure S127 HRESIMS spectrum of artematrolide I (13).

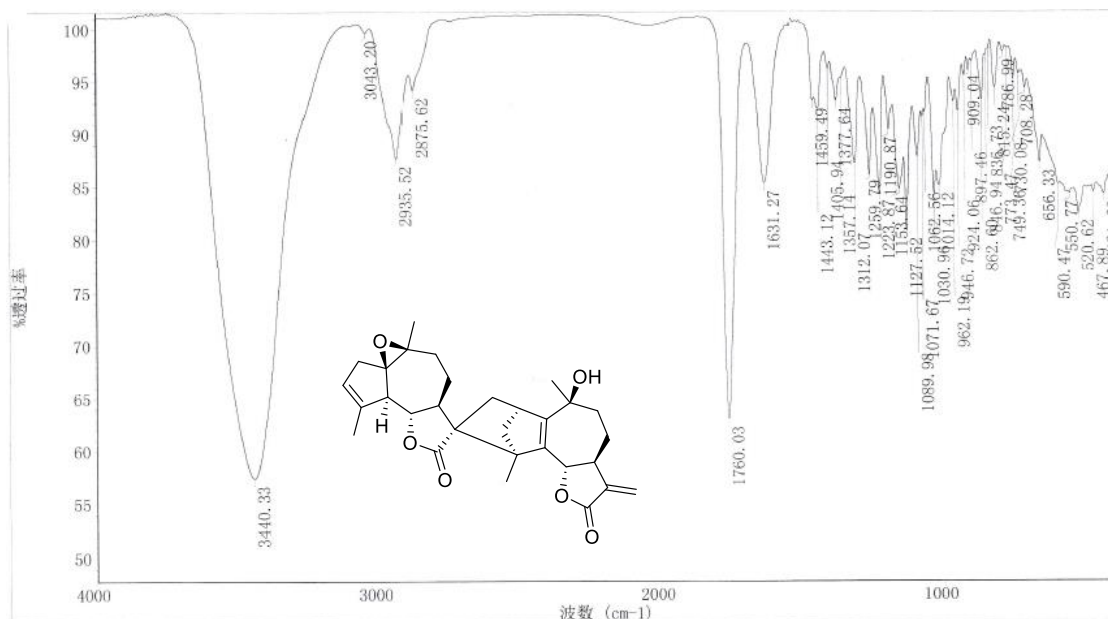

Sample Name: jar144b

KBr压片

采集时间: 星期四 12月 26 18:46:57 2019 (GMT+08:00)

仪器型号: NICOLET iS10

Software version: OMNIC 9.8.372

样品扫描次数: 16

背景扫描次数: 16

分辨率: 4.000

采样增益: 1.0

动镜速度: 0.4747

光阑: 80.00

Figure S128 IR spectrum of artematrolide I (13).

#### Rudolph Research Analytical

This sample was measured on an Autopol VI, Serial #91058  
Manufactured by Rudolph Research Analytical, Hackettstown, NJ, USA.

Measurement Date: Friday, 13-DEC-2019

Set Temperature: OFF

Time Delay: Disabled

Delay between Measurement: Disabled

| n | Average | Std.Dev. | % RSD | Maximum | Minimum |
|---|---------|----------|-------|---------|---------|
| 5 | 34.73   | 0.39     | 1.12  | 35.41   | 34.49   |

| S.No | Sample ID | Time        | Result | Scale | OR °Arc | WLG.nm | Lg.mm  | Conc.g/100ml | Temp. |
|------|-----------|-------------|--------|-------|---------|--------|--------|--------------|-------|
| 1    | jar144b   | 04:58:51 PM | 35.41  | SR    | 0.0347  | 589    | 100.00 | 0.098        | 23.3  |
| 2    | jar144b   | 04:58:59 PM | 34.59  | SR    | 0.0339  | 589    | 100.00 | 0.098        | 23.3  |
| 3    | jar144b   | 04:59:07 PM | 34.49  | SR    | 0.0338  | 589    | 100.00 | 0.098        | 23.3  |
| 4    | jar144b   | 04:59:15 PM | 34.49  | SR    | 0.0338  | 589    | 100.00 | 0.098        | 23.3  |
| 5    | jar144b   | 04:59:23 PM | 34.69  | SR    | 0.0340  | 589    | 100.00 | 0.098        | 23.3  |

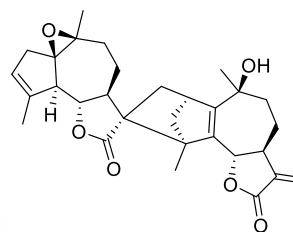

Figure S129 Optical rotation spectrum of artematrolide I (13).

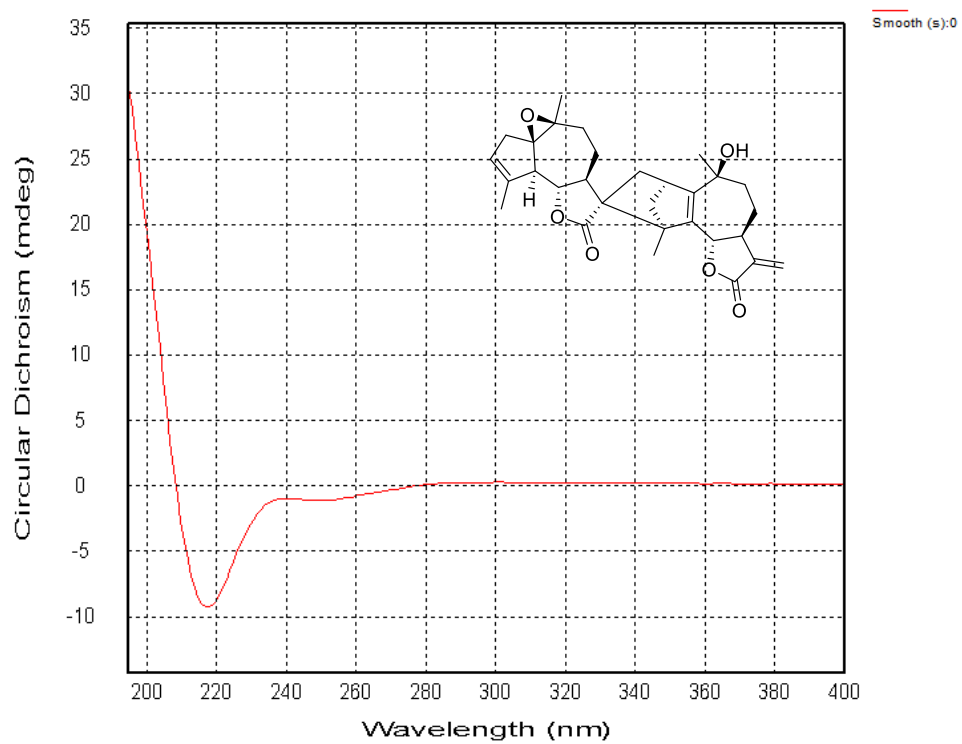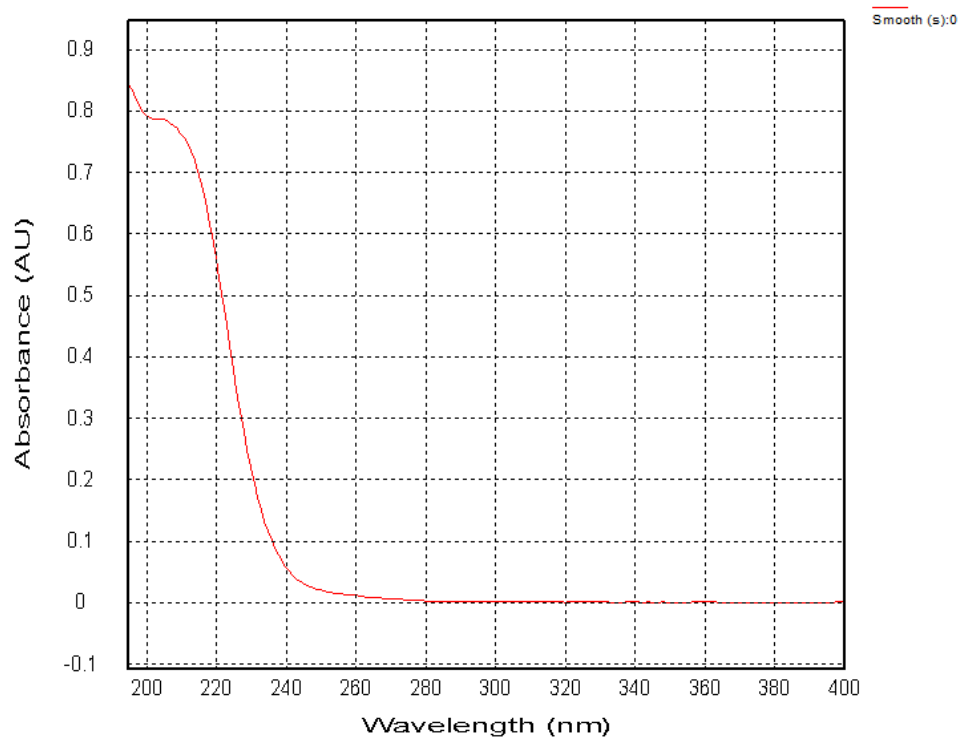

**Figure S130** CD (top) and UV (bottom) spectra of artematrolide I (**13**).

## 15. NMR, MS, IR, $[\alpha]_D$ and CD spectra of compound 14

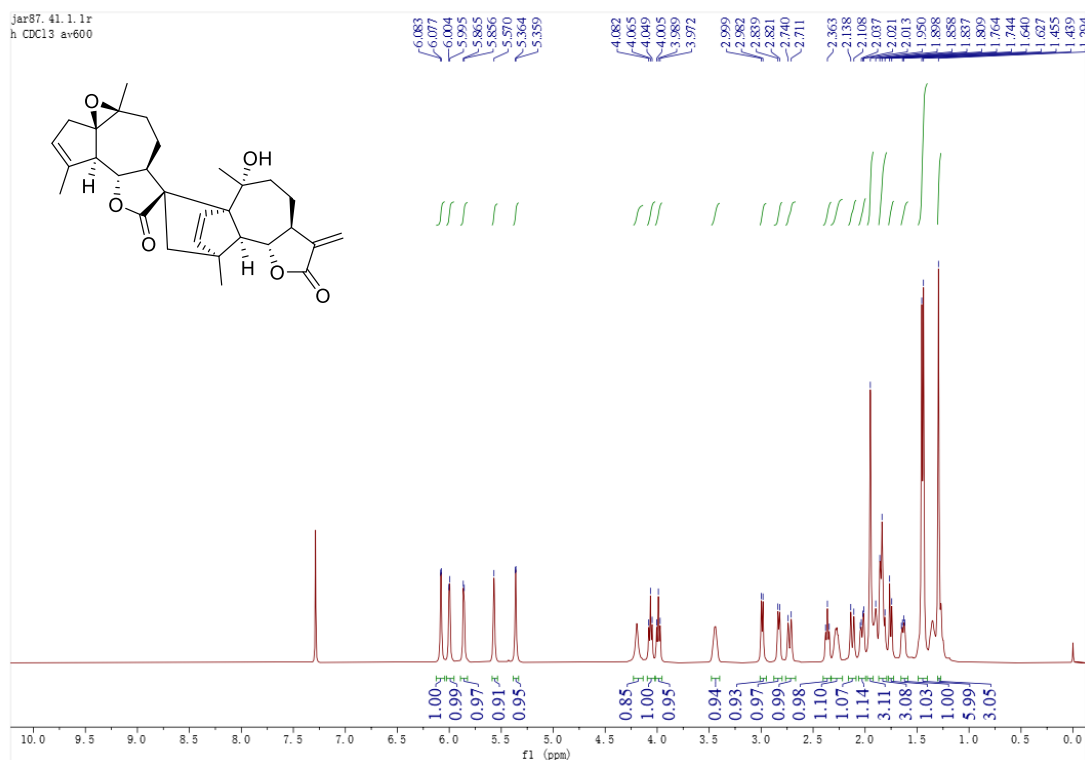

Figure S131 <sup>1</sup>H NMR spectrum (600 MHz) of artematrolide J (14) in CDCl<sub>3</sub>.

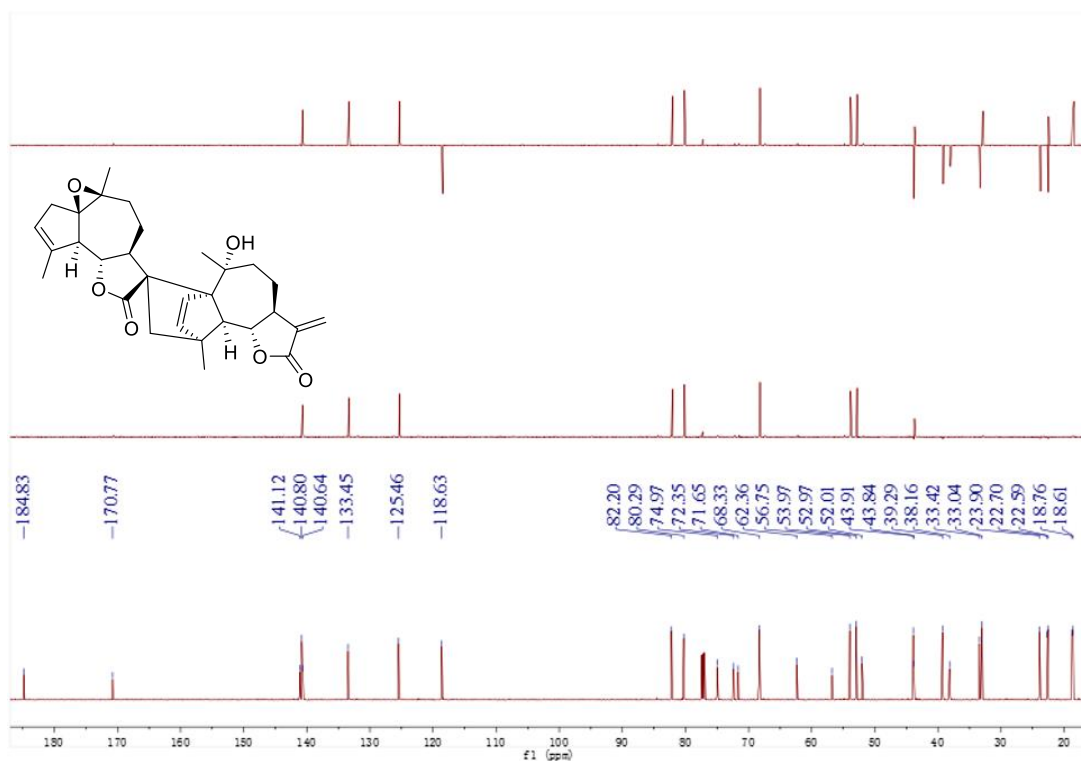

Figure S132 <sup>13</sup>C NMR spectrum (150 MHz) of artematrolide J (14) in CDCl<sub>3</sub>.

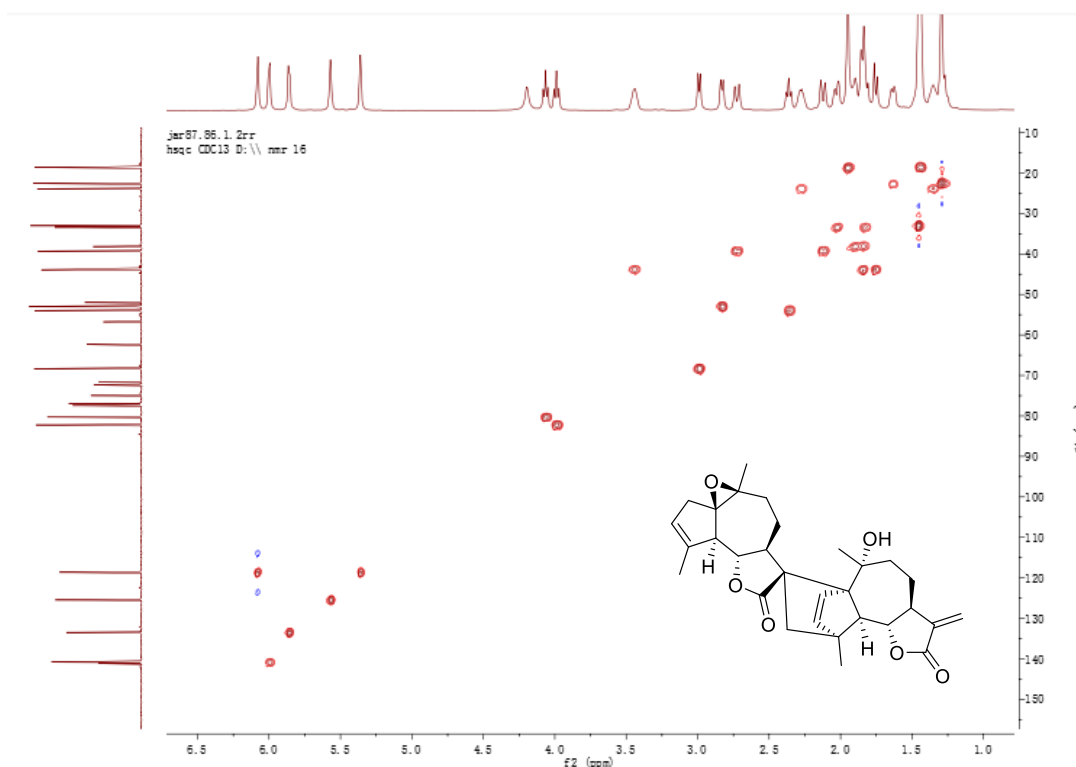

**Figure S133** HSQC spectrum (600 MHz) of artematrolide J (**14**) in  $\text{CDCl}_3$ .

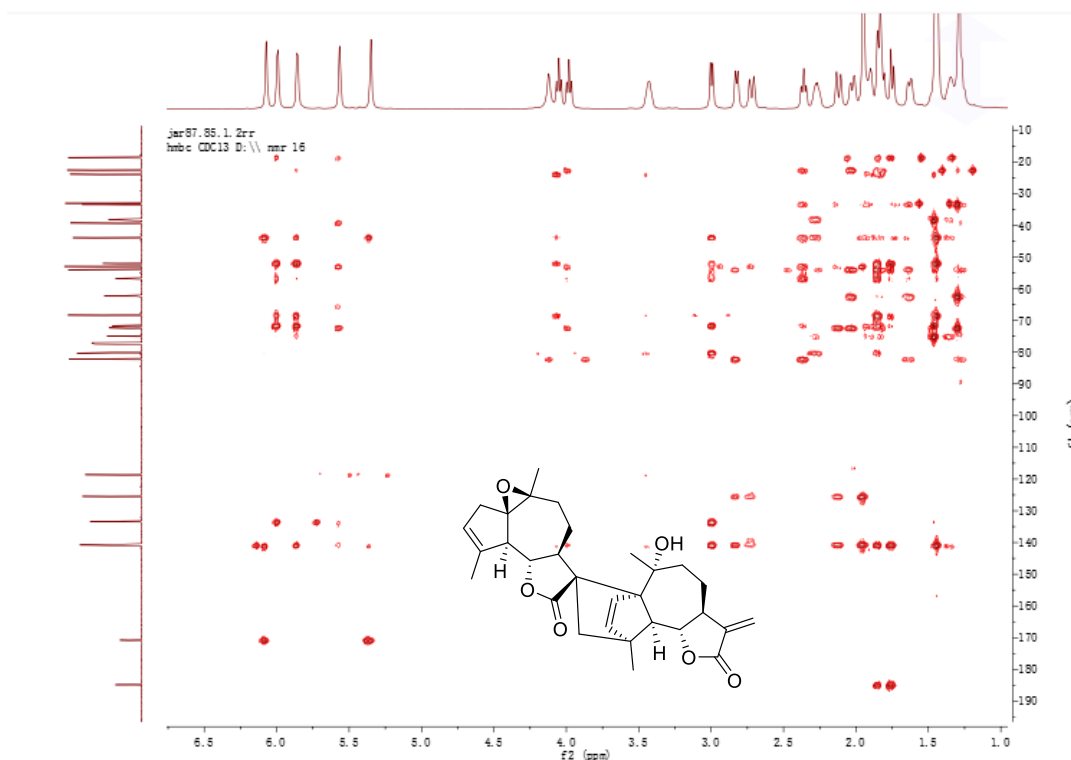

**Figure S134** HMBC spectrum (600 MHz) of artematrolide J (**14**) in  $\text{CDCl}_3$ .

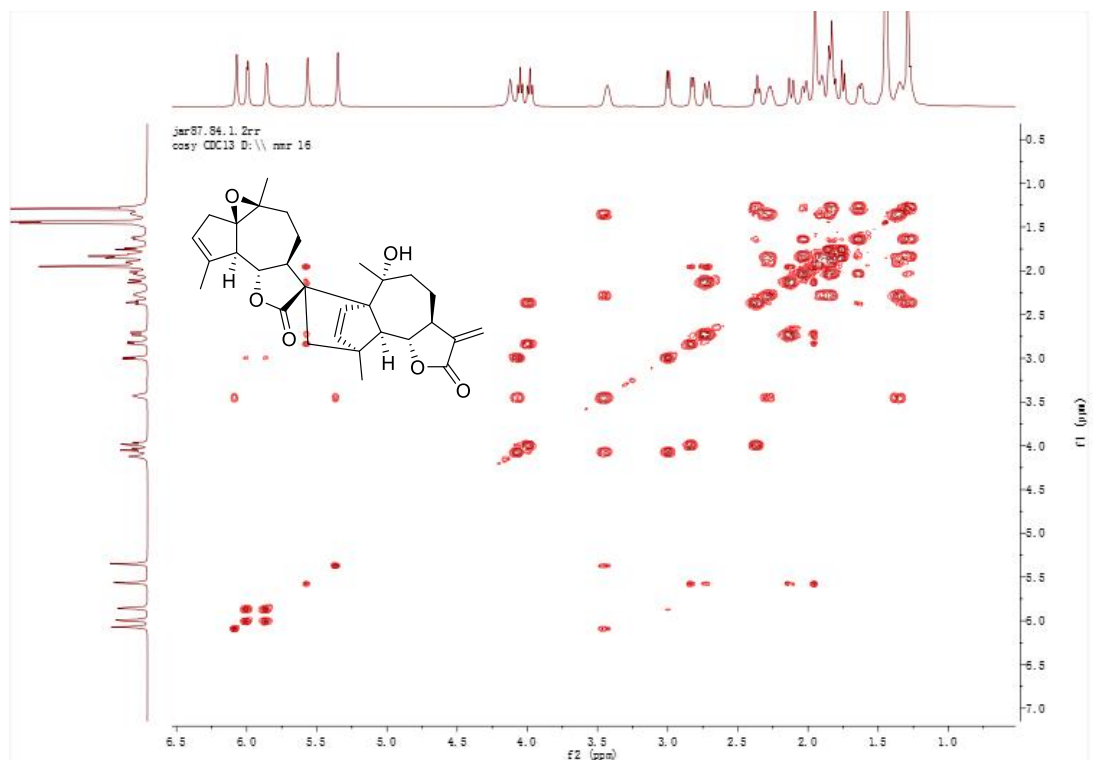

Figure S135  $^1\text{H}$ - $^1\text{H}$  COSY spectrum (600 MHz) of artematrolide J (14) in  $\text{CDCl}_3$ .

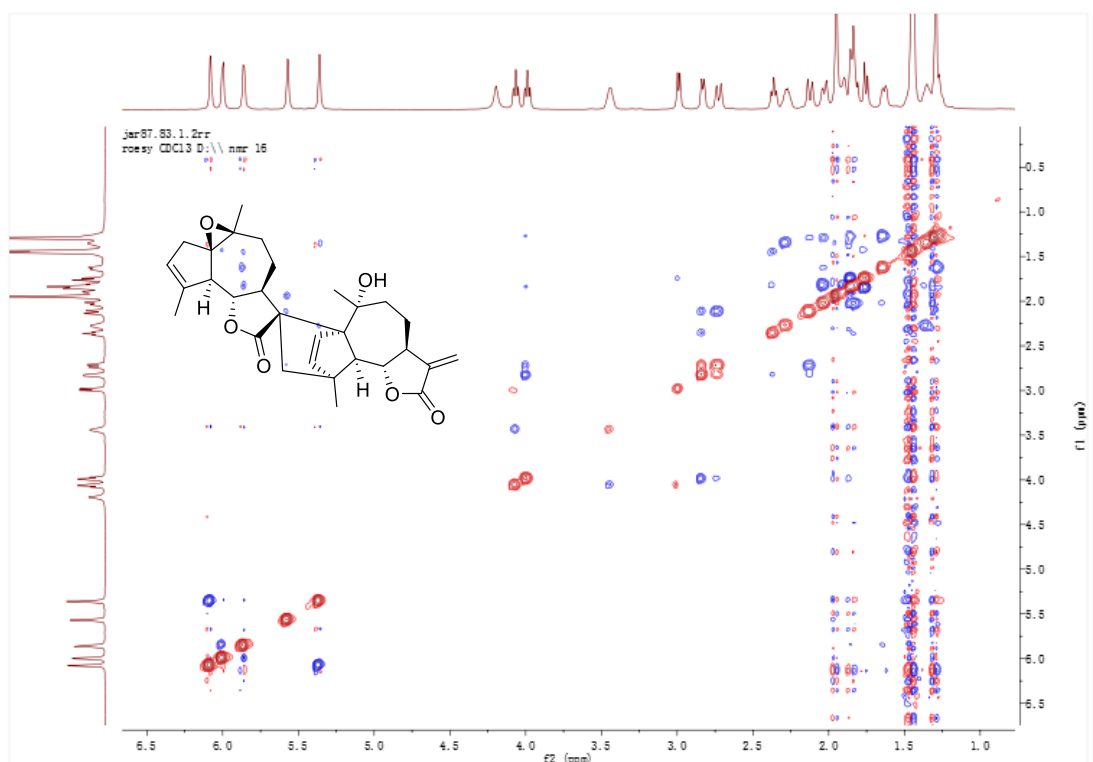

Figure S136 ROESY spectrum (600 MHz) of artematrolide J (14) in  $\text{CDCl}_3$ .



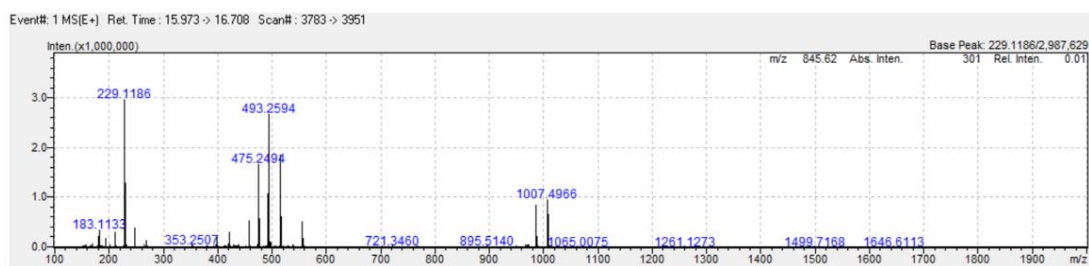

Figure S137 HRESIMS spectrum of artematrolide J (14).

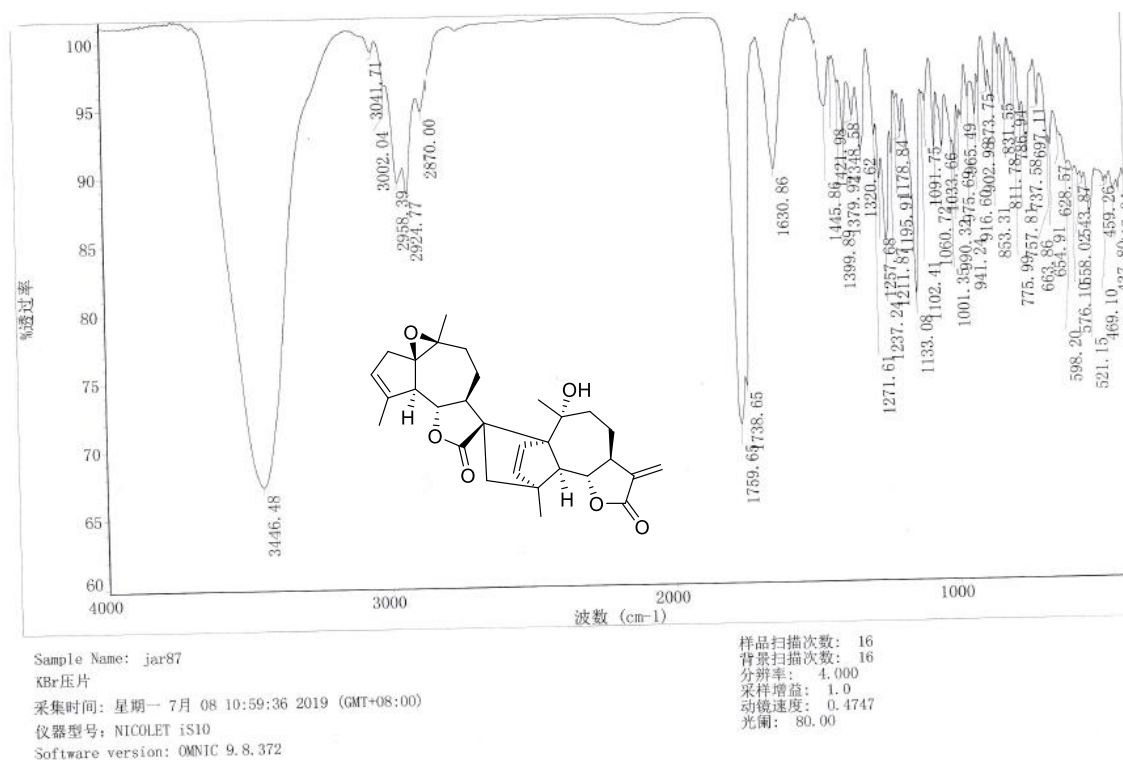

Figure S138 IR spectrum of artematrolide J (14).

**Rudolph Research Analytical**

This sample was measured on an Autopol VI, Serial #91058  
 Manufactured by Rudolph Research Analytical, Hackettstown, NJ, USA.

Measurement Date : Monday, 08-JUL-2019

Set Temperature : OFF

Time Delay : Disabled

Delay between Measurement : Disabled

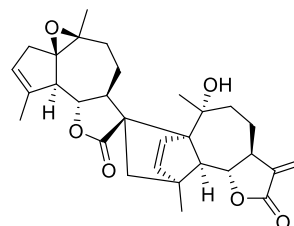

| <u>n</u>    | <u>Average</u>   | <u>Std.Dev.</u> | <u>% RSD</u>  | <u>Maximum</u> | <u>Minimum</u> |                 |               |                     |              |  |
|-------------|------------------|-----------------|---------------|----------------|----------------|-----------------|---------------|---------------------|--------------|--|
| 5           | 49.43            | 0.57            | 1.15          | 50.00          | 48.57          |                 |               |                     |              |  |
| <u>S.No</u> | <u>Sample ID</u> | <u>Time</u>     | <u>Result</u> | <u>Scale</u>   | <u>OR °Arc</u> | <u>W.L.G.nm</u> | <u>I.g.mm</u> | <u>Conc.g/100ml</u> | <u>Temp.</u> |  |
| 1           | jar87            | 05:23:13 PM     | 49.71         | SR             | 0.0174         | 589             | 100.00        | 0.035               | 24.3         |  |
| 2           | jar87            | 05:23:22 PM     | 49.71         | SR             | 0.0174         | 589             | 100.00        | 0.035               | 24.3         |  |
| 3           | jar87            | 05:23:30 PM     | 49.14         | SR             | 0.0172         | 589             | 100.00        | 0.035               | 24.3         |  |
| 4           | jar87            | 05:23:37 PM     | 48.57         | SR             | 0.0170         | 589             | 100.00        | 0.035               | 24.3         |  |
| 5           | jar87            | 05:23:45 PM     | 50.00         | SR             | 0.0175         | 589             | 100.00        | 0.035               | 24.3         |  |

Figure S139 Optical rotation spectrum of artematrolide J (14).

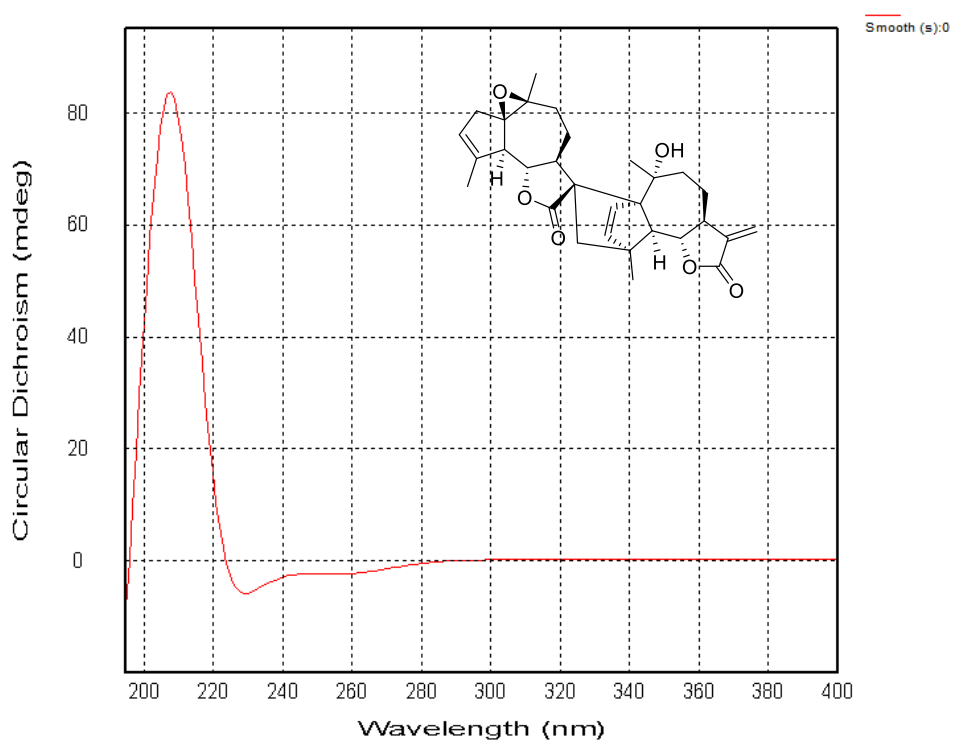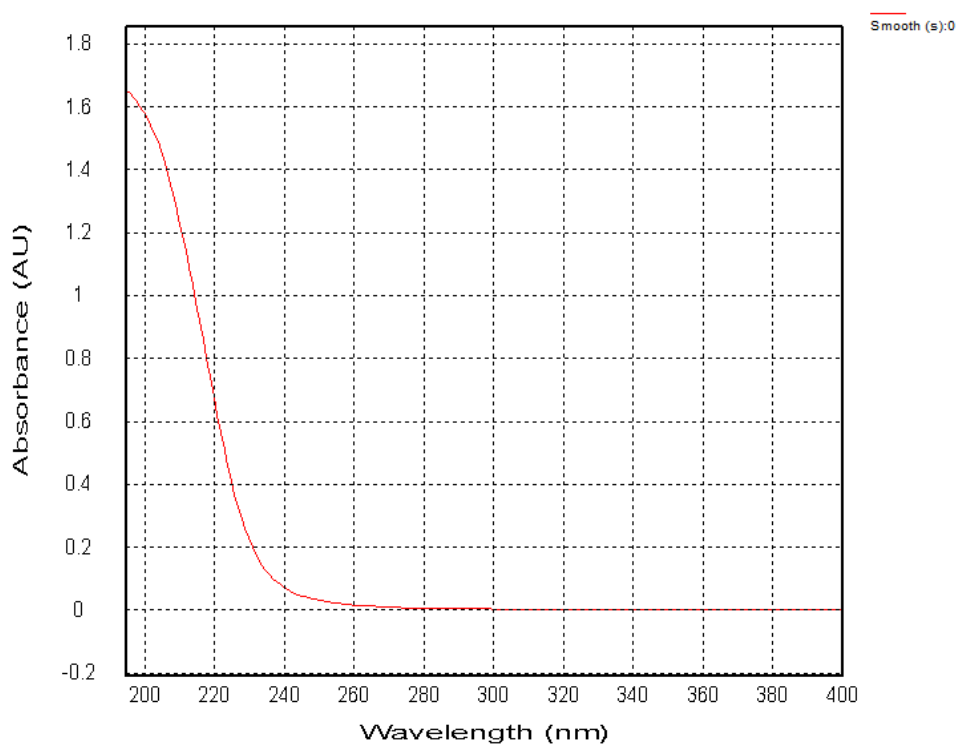

**Figure S140** CD (top) and UV (bottom) spectra of artematrolide J (**14**).

## 16. NMR, MS, IR, $[\alpha]_D$ and CD spectra of compound 15

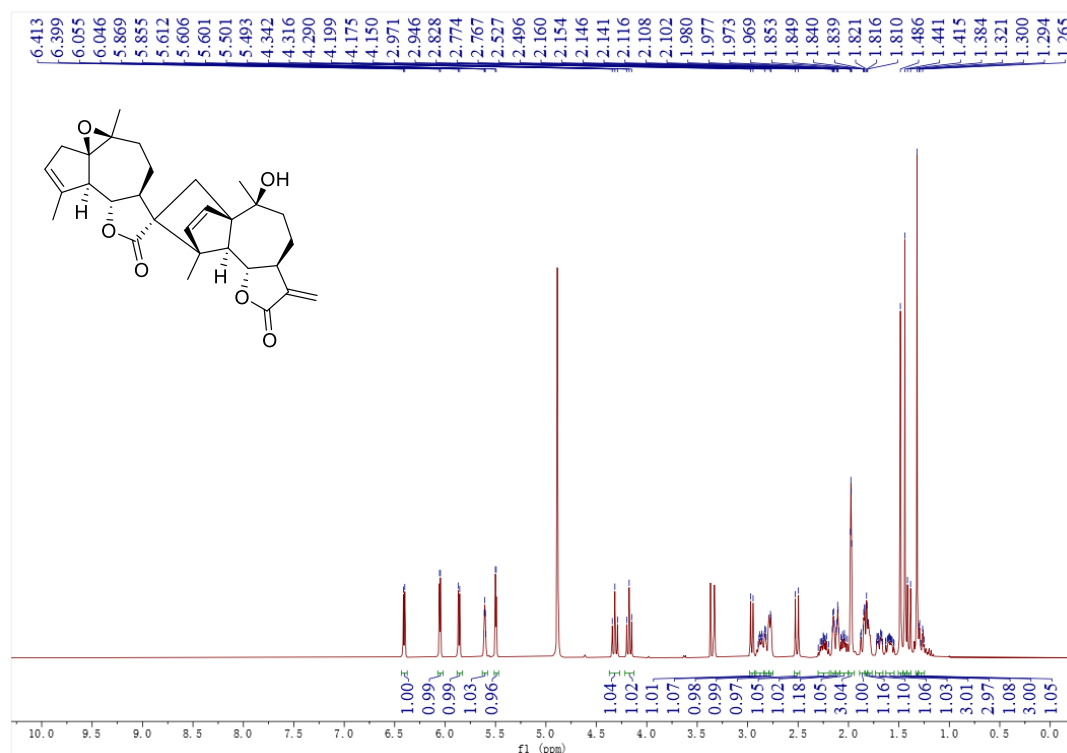

**Figure S141**  $^1\text{H}$  NMR spectrum (400 MHz) of artematrolide K (**15**) in  $\text{CD}_3\text{OD}$ .

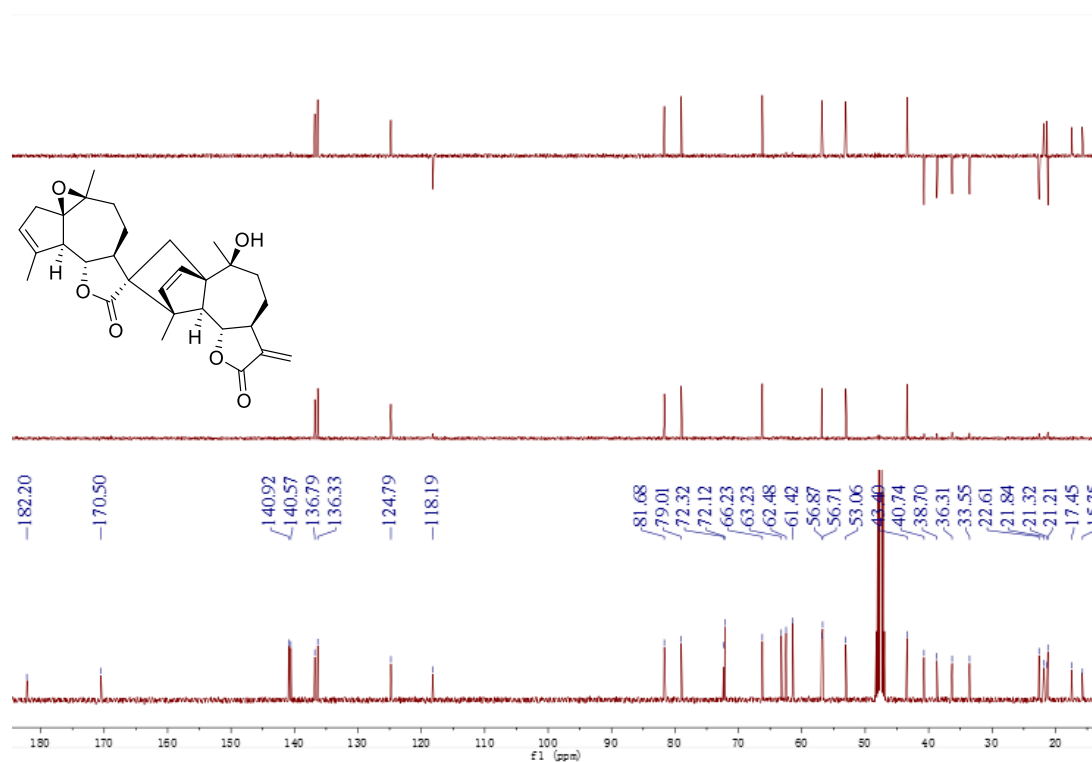

**Figure S142**  $^{13}\text{C}$  NMR spectrum (100 MHz) of artematrolide K (**15**) in  $\text{CD}_3\text{OD}$ .

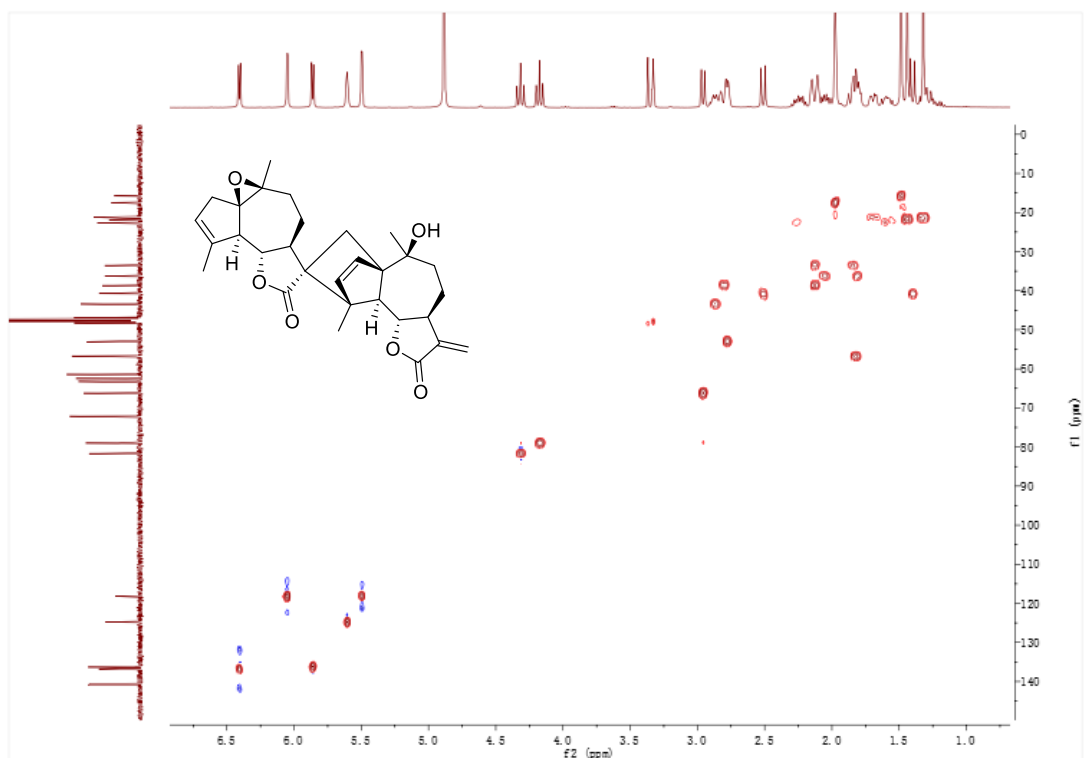

**Figure S143** HSQC spectrum (600 MHz) of artematrolide K (**15**) in CD<sub>3</sub>OD.

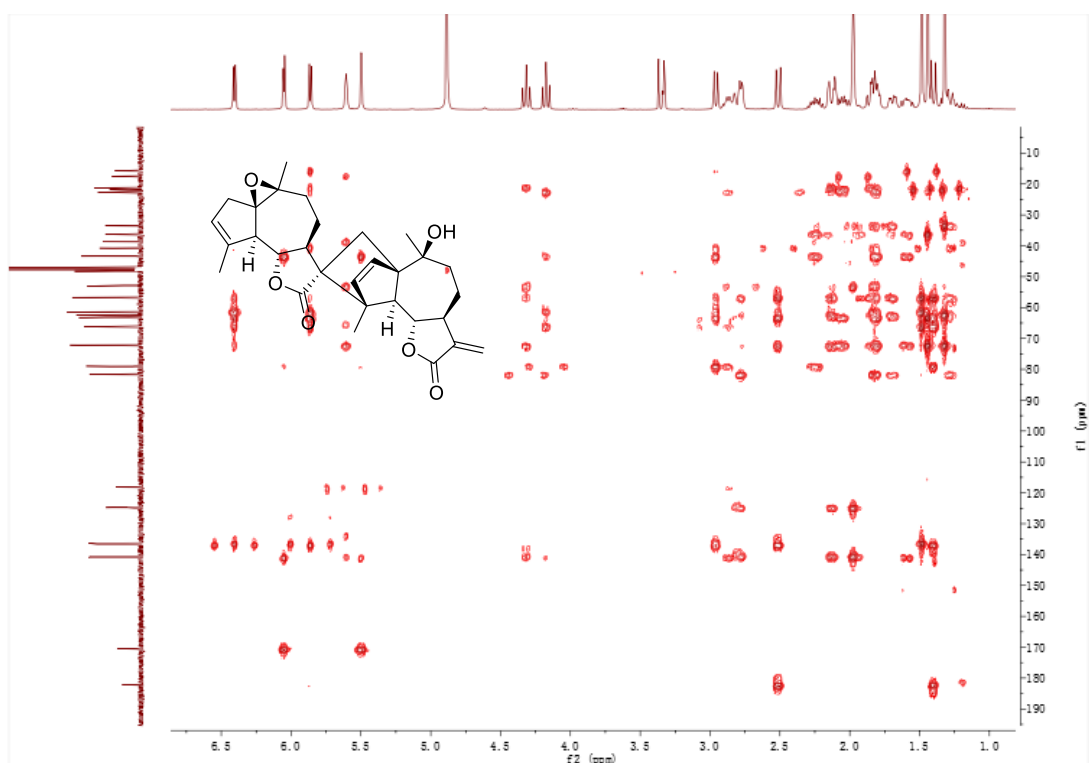

**Figure S144** HMBC spectrum (600 MHz) of artematrolide K (**15**) in CD<sub>3</sub>OD.

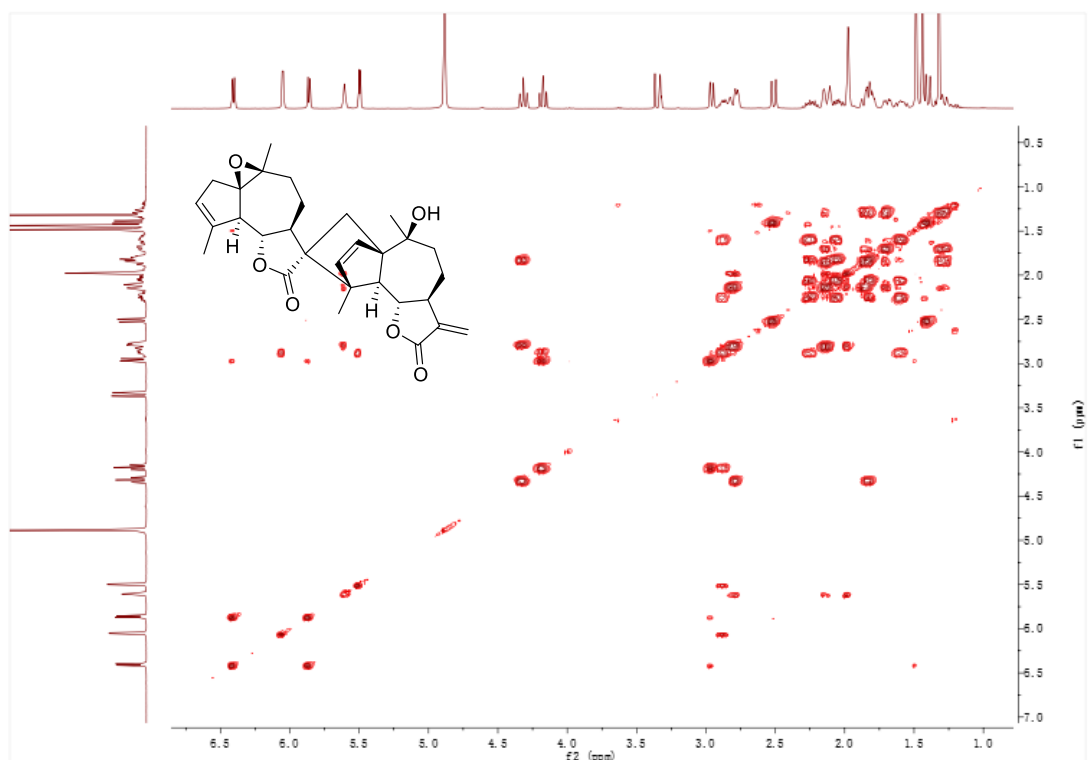

**Figure S145**  $^1\text{H}$ - $^1\text{H}$  COSY spectrum (600 MHz) of artematrolide K (**15**) in  $\text{CD}_3\text{OD}$ .

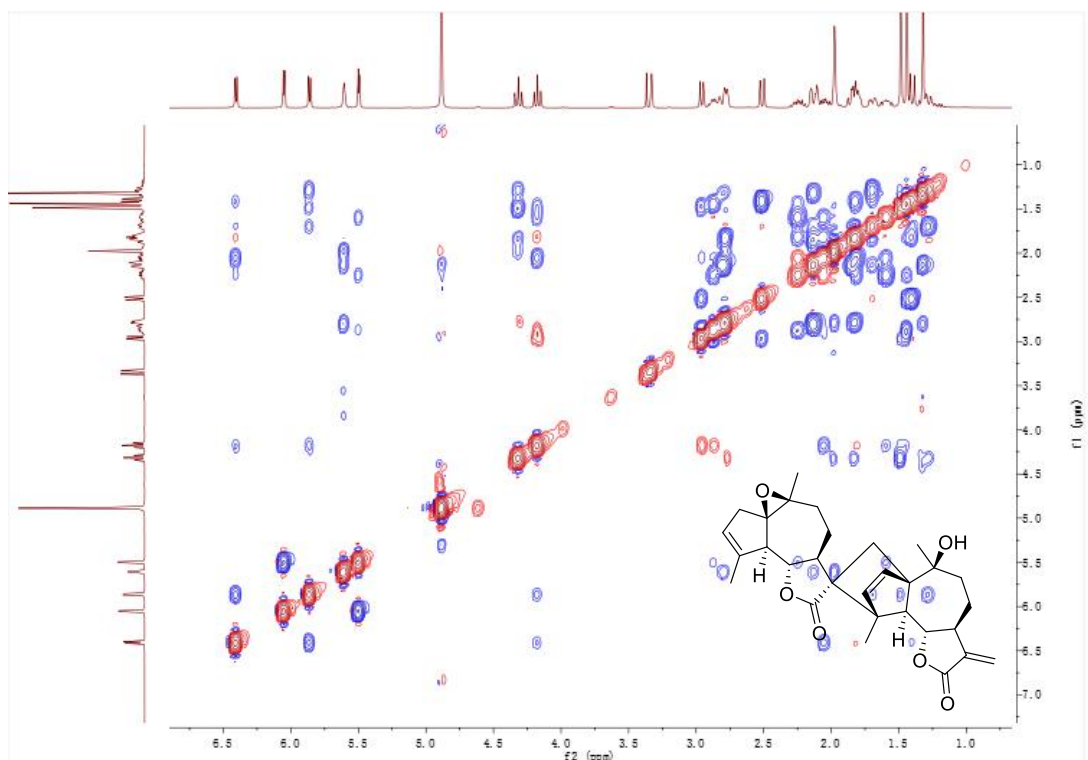

**Figure S146** ROESY spectrum (600 MHz) of artematrolide K (**15**) in  $\text{CD}_3\text{OD}$ .

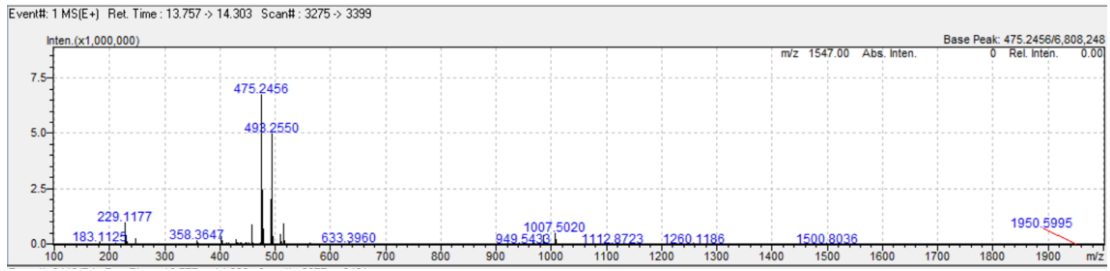

Figure S147 HRESIMS spectrum of artematrolide K (15).

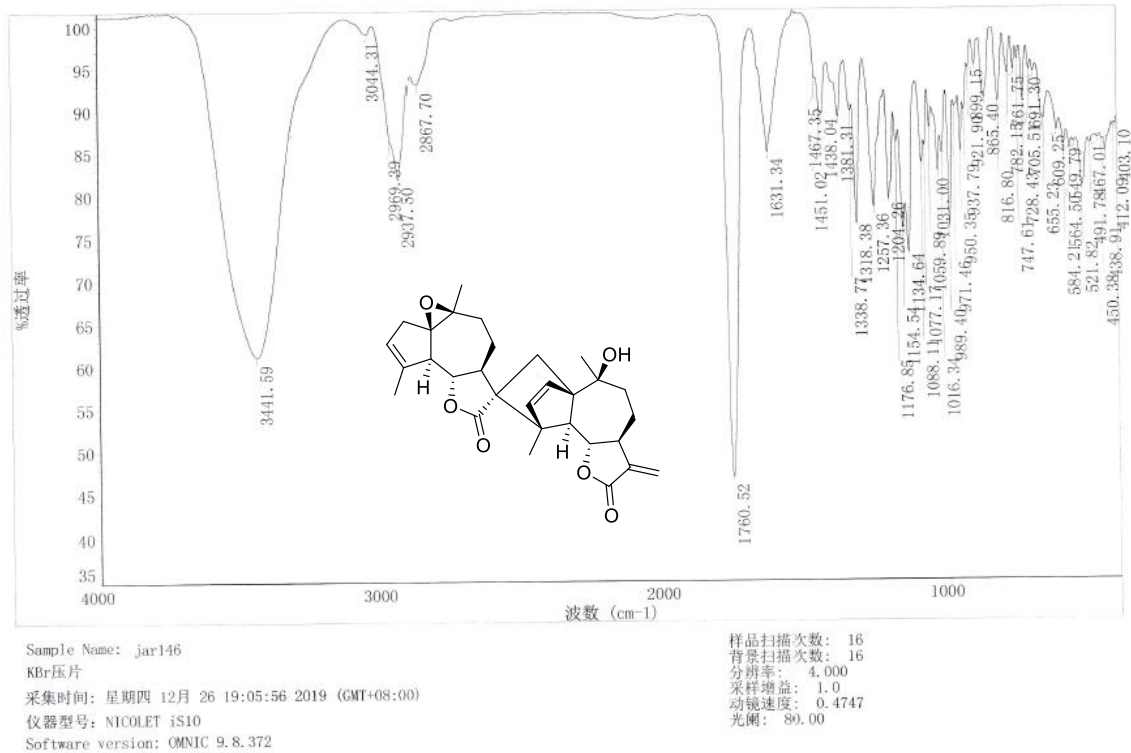

Figure S148 IR spectrum of artematrolide K (15).

**Rudolph Research Analytical**

This sample was measured on an Autopol VI, Serial #91058  
 Manufactured by Rudolph Research Analytical, Hackettstown, NJ, USA.  
 Measurement Date: Friday, 13-DEC-2019  
 Set Temperature: OFF  
 Time Delay: Disabled  
 Delay between Measurement: Disabled

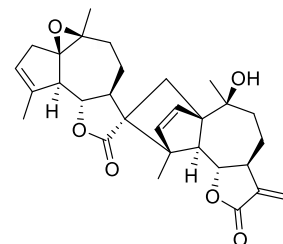

| n | Average | Std.Dev. | % RSD | Maximum | Minimum |
|---|---------|----------|-------|---------|---------|
| 5 | 17.39   | 0.35     | 2.01  | 17.95   | 17.05   |

  

| S.No | Sample ID | Time        | Result | Scale | OR °Arc | WLG.nm | Lg.mm  | Conc.g/100ml | Temp. |
|------|-----------|-------------|--------|-------|---------|--------|--------|--------------|-------|
| 1    | jar146    | 05:13:39 PM | 17.05  | SR    | 0.0133  | 589    | 100.00 | 0.078        | 23.4  |
| 2    | jar146    | 05:13:48 PM | 17.95  | SR    | 0.0140  | 589    | 100.00 | 0.078        | 23.4  |
| 3    | jar146    | 05:13:56 PM | 17.18  | SR    | 0.0134  | 589    | 100.00 | 0.078        | 23.4  |
| 4    | jar146    | 05:14:04 PM | 17.31  | SR    | 0.0135  | 589    | 100.00 | 0.078        | 23.4  |
| 5    | jar146    | 05:14:12 PM | 17.44  | SR    | 0.0136  | 589    | 100.00 | 0.078        | 23.3  |

Figure S149 Optical rotation spectrum of artematrolide K (15).

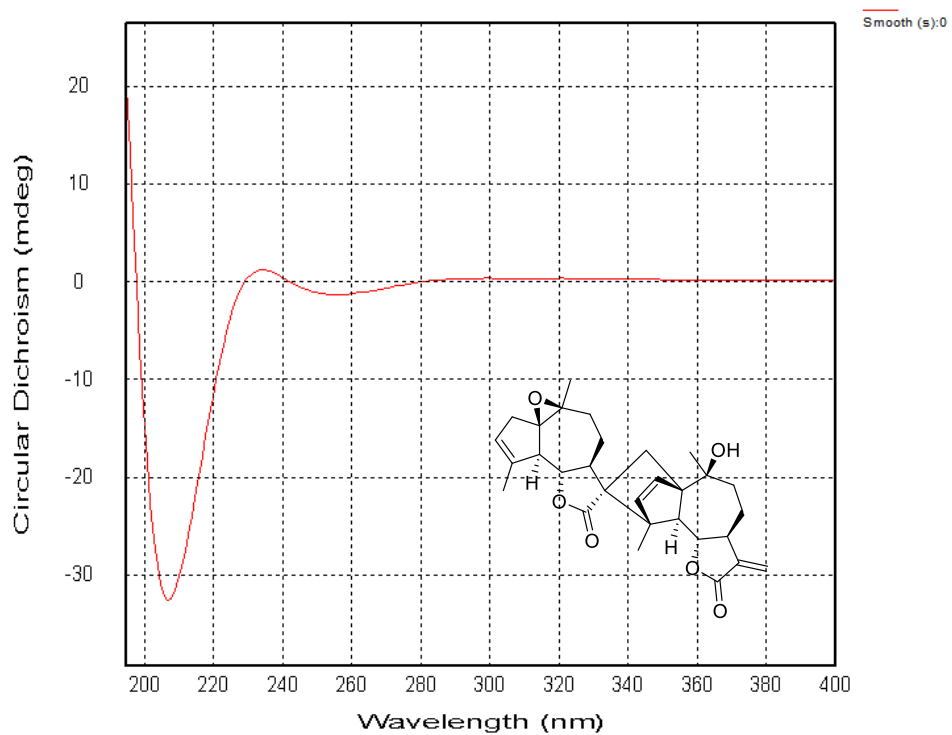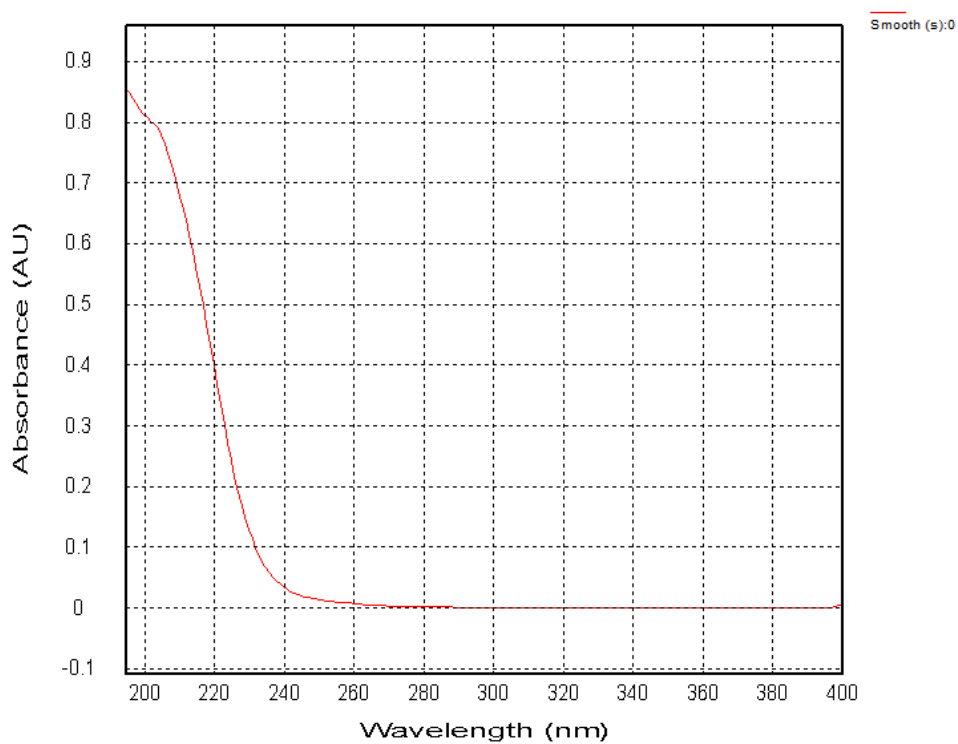

**Figure S150** CD (top) and UV (bottom) spectra of artematrolide K (**15**).

## 17. NMR, MS, IR, $[\alpha]_D$ and CD spectra of compound 16

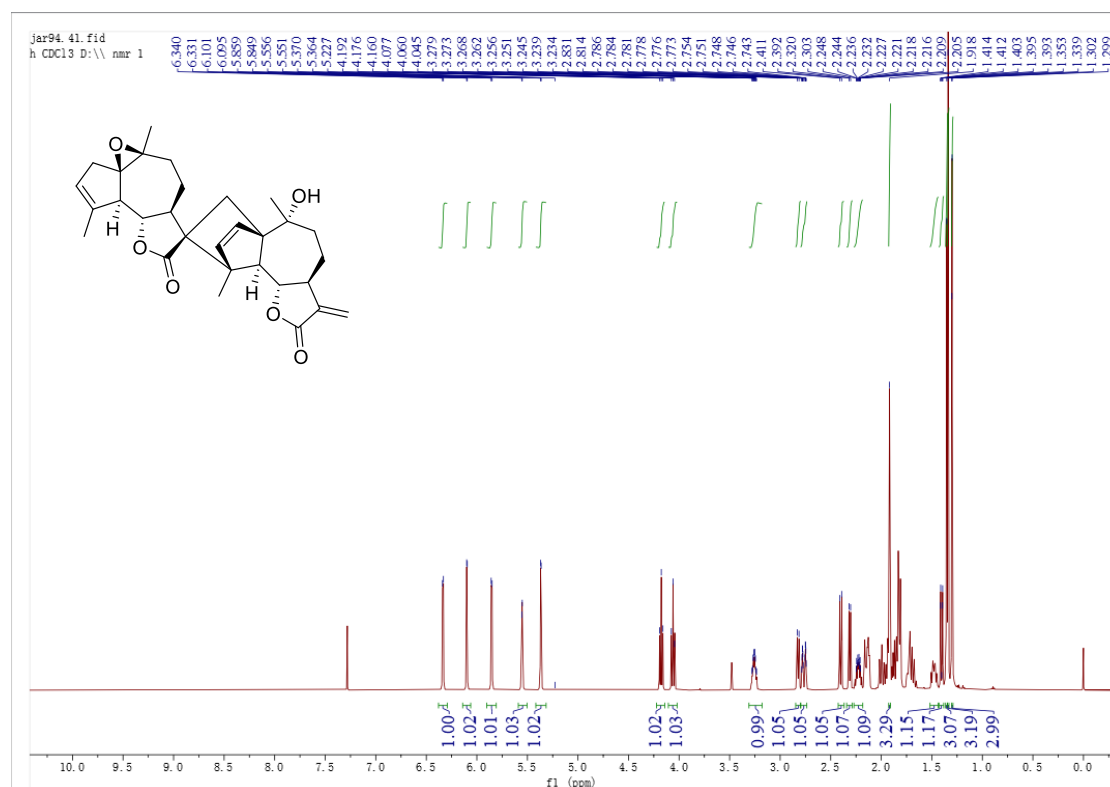

Figure S151  $^1\text{H}$  NMR spectrum (600 MHz) of artematrolide L (**16**) in  $\text{CDCl}_3$ .

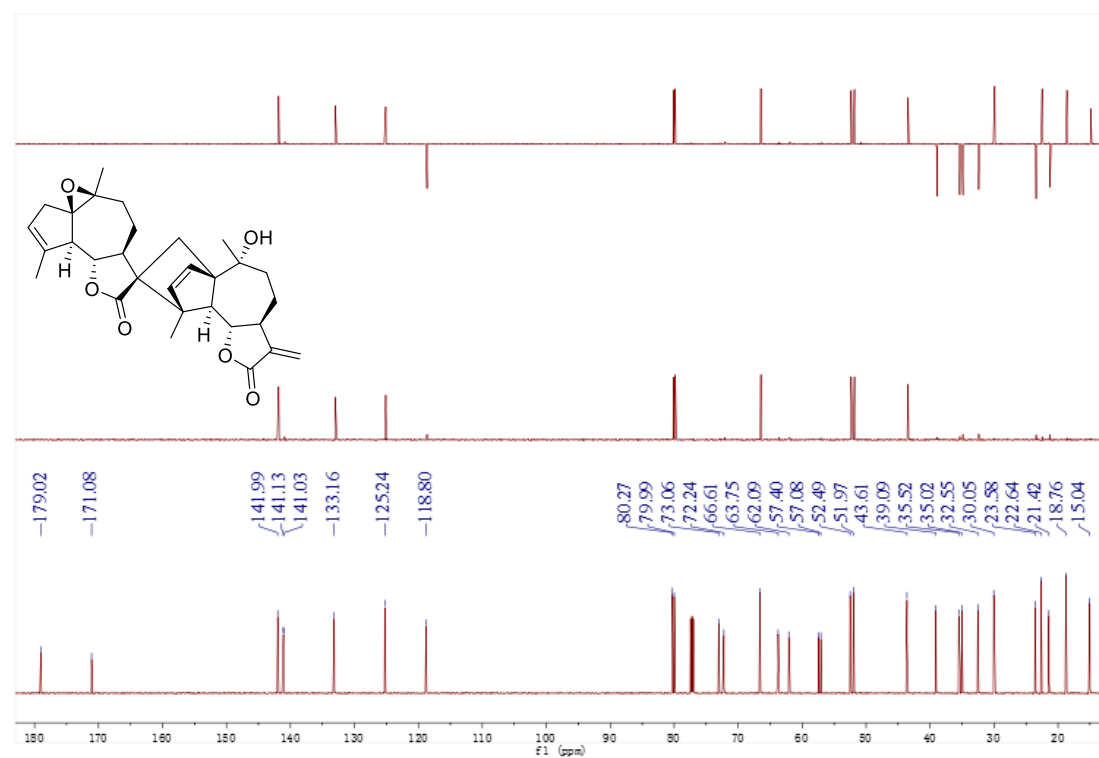

Figure S152  $^{13}\text{C}$  NMR spectrum (150 MHz) of artematrolide L (**16**) in  $\text{CDCl}_3$ .



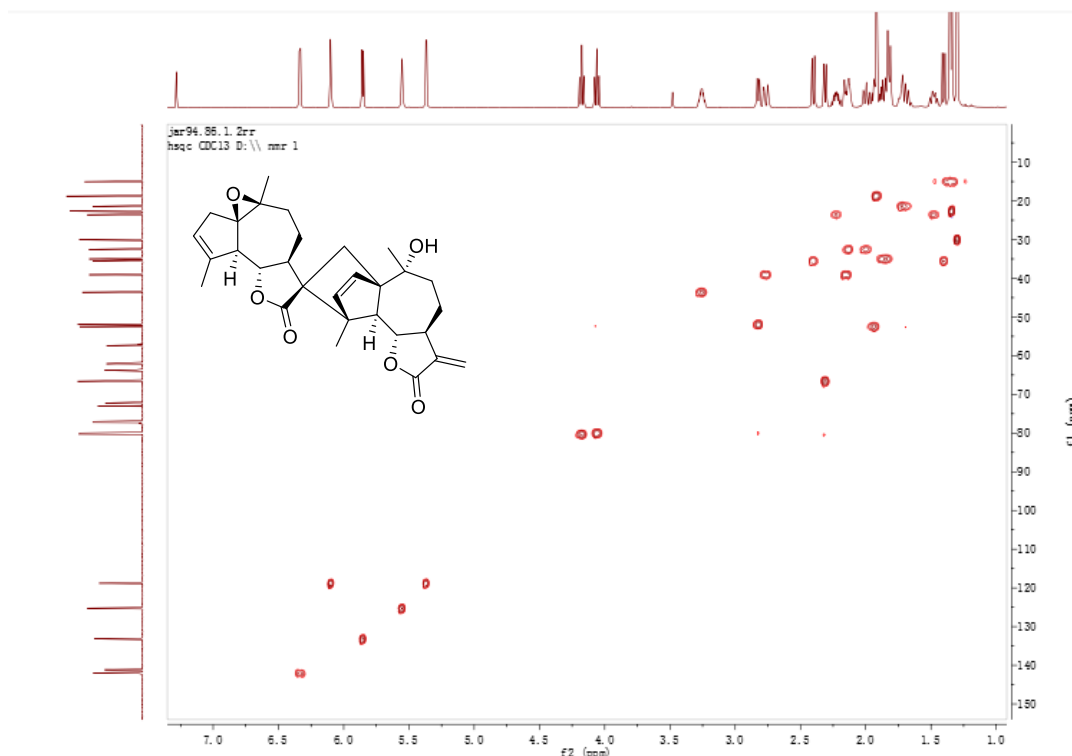

**Figure S153** HSQC spectrum (600 MHz) of artematrolide L (**16**) in CDCl<sub>3</sub>.

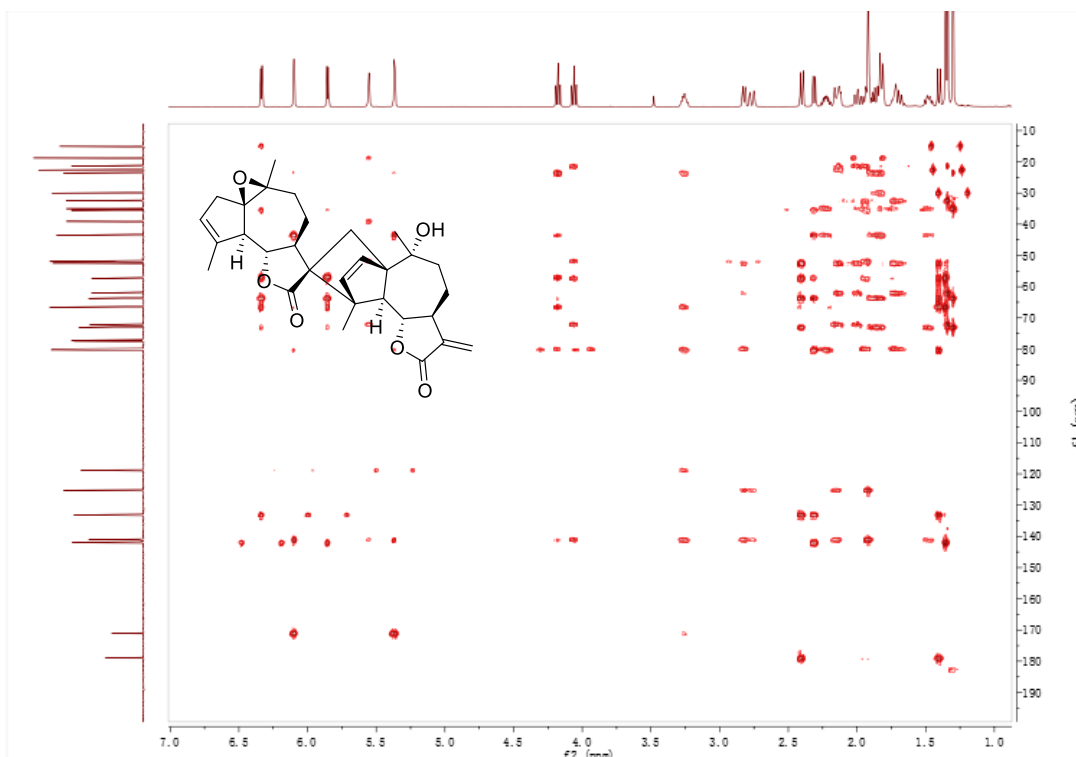

**Figure S154** HMBC spectrum (600 MHz) of artematrolide L (**16**) in CDCl<sub>3</sub>.

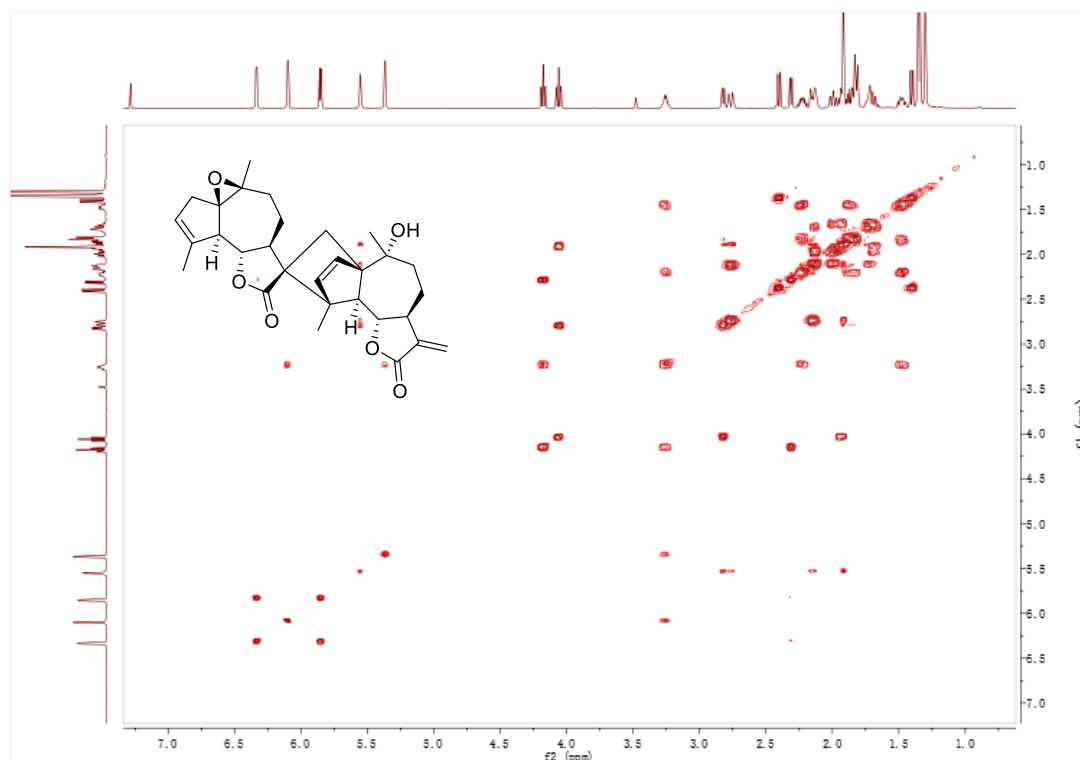

**Figure S155**  $^1\text{H}$ - $^1\text{H}$  COSY spectrum (600 MHz) of artematrolide L (**16**) in  $\text{CDCl}_3$ .

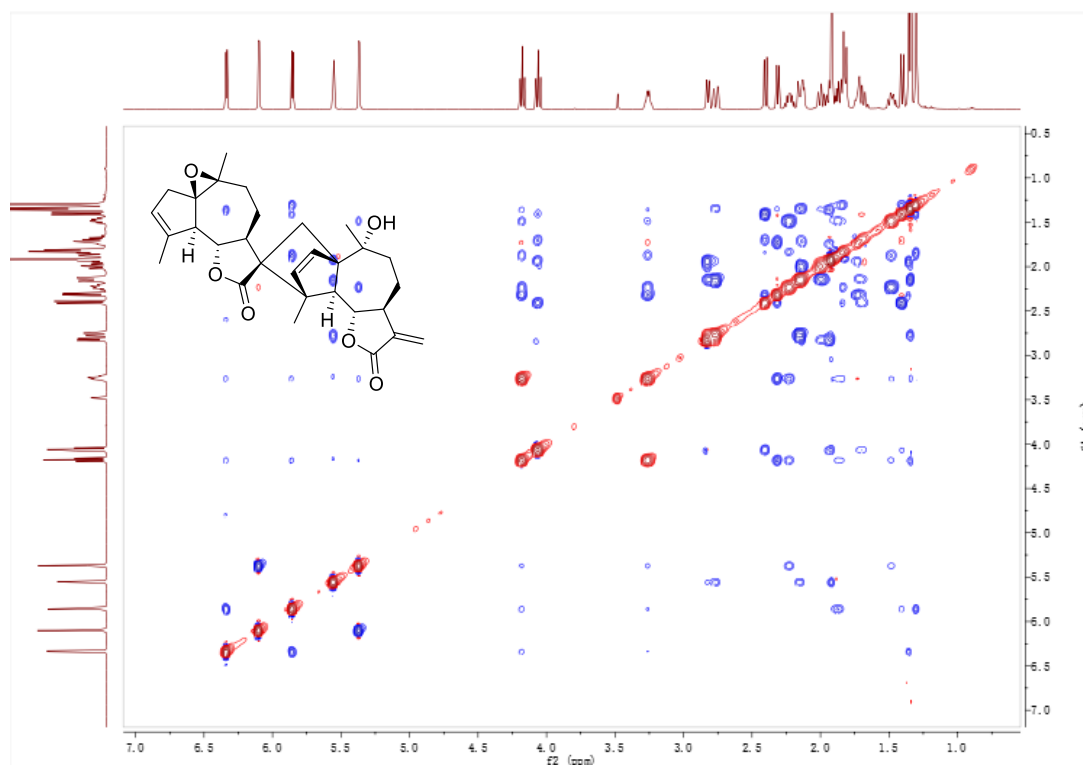

**Figure S156** ROESY spectrum (600 MHz) of artematrolide L (**16**) in  $\text{CDCl}_3$ .

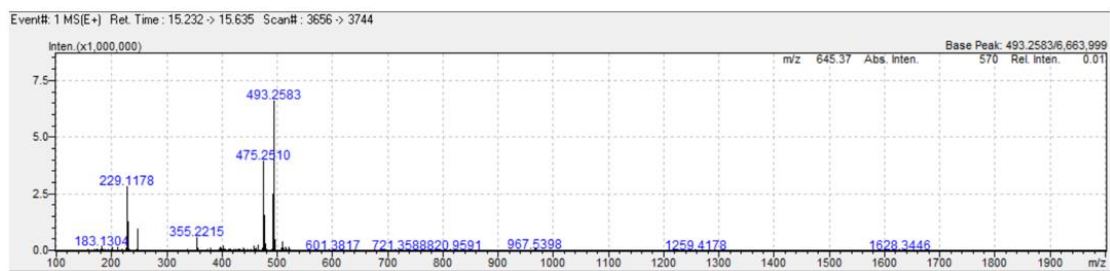

Figure S157 HRESIMS spectrum of artematrolide L (16).

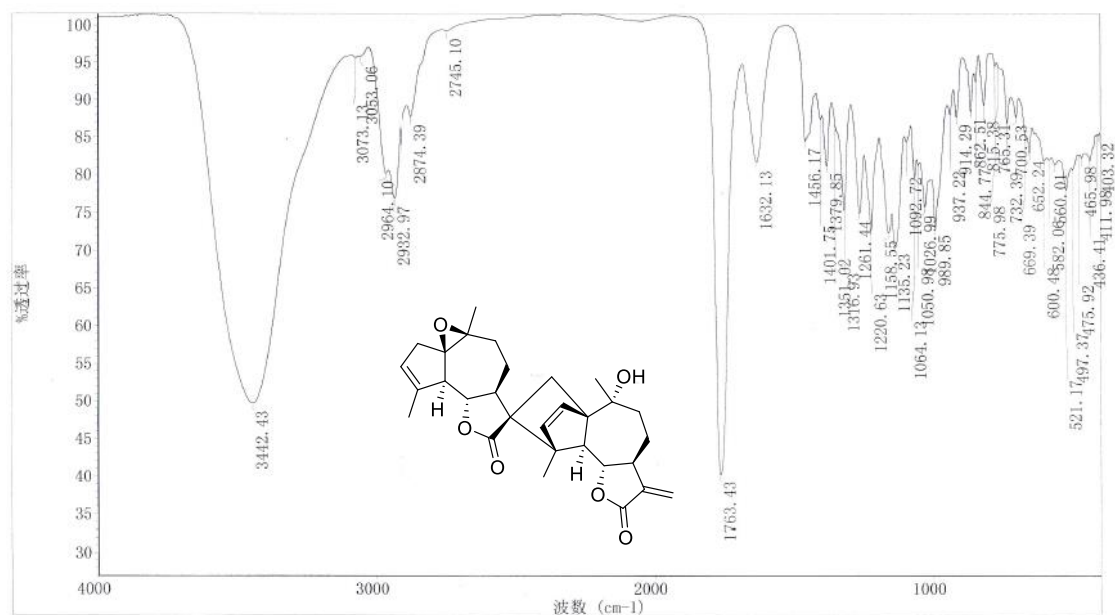

Sample Name: jar94

KBr:压片

采集时间: 星期一 1月 13 15:01:36 2020 (GMT+08:00)

仪器型号: NICOLET iS10

Software version: OMNIC 9.8.372

样品扫描次数: 16

背景扫描次数: 16

分辨率: 4.000

采样增益: 1.0

动镜速度: 0.4747

光源: 80.00

Figure S158 IR spectrum of artematrolide L (16).

**Rudolph Research Analytical**

This sample was measured on an Autopol VI, Serial #91058  
Manufactured by Rudolph Research Analytical, Hackettstown, NJ, USA.

Measurement Date : Saturday, 04-JAN-2020

Set Temperature : OFF

Time Delay : Disabled

Delay between Measurement : Disabled

| n | Average | Std.Dev. | % RSD | Maximum | Minimum |
|---|---------|----------|-------|---------|---------|
| 5 | 11.97   | 2.98     | 24.89 | 16.51   | 9.05    |

| S.No | Sample ID | Time        | Result | Scale | OR °Arc | WLG.nm | Lg.mm  | Conc.g/100ml | Temp. |
|------|-----------|-------------|--------|-------|---------|--------|--------|--------------|-------|
| 1    | jar94     | 01:36:47 PM | 9.68   | SR    | 0.0061  | 589    | 100.00 | 0.063        | 22.9  |
| 2    | jar94     | 01:36:55 PM | 9.05   | SR    | 0.0057  | 589    | 100.00 | 0.063        | 22.9  |
| 3    | jar94     | 01:37:03 PM | 11.59  | SR    | 0.0073  | 589    | 100.00 | 0.063        | 22.9  |
| 4    | jar94     | 01:37:11 PM | 13.02  | SR    | 0.0082  | 589    | 100.00 | 0.063        | 22.8  |
| 5    | jar94     | 01:37:28 PM | 16.51  | SR    | 0.0104  | 589    | 100.00 | 0.063        | 22.8  |

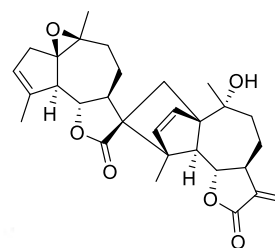

Figure S159 Optical rotation spectrum of artematrolide L (16).

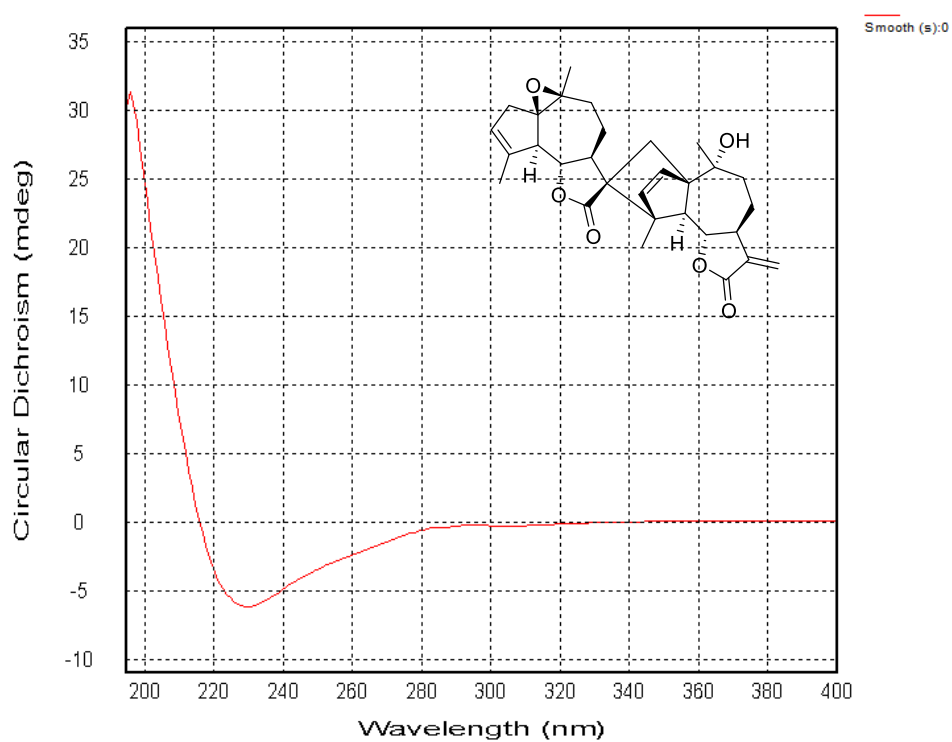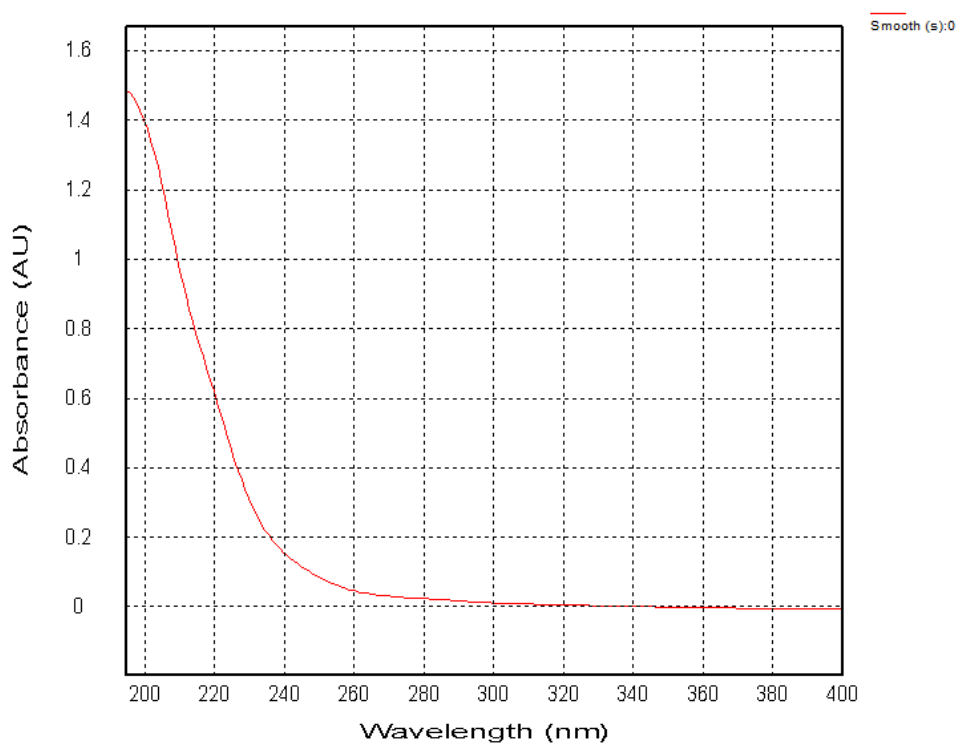

**Figure S160** CD (top) and UV (bottom) spectra of artematrolide L (**16**).

## 18. NMR, MS, IR, $[\alpha]_D$ and CD spectra of compound 17

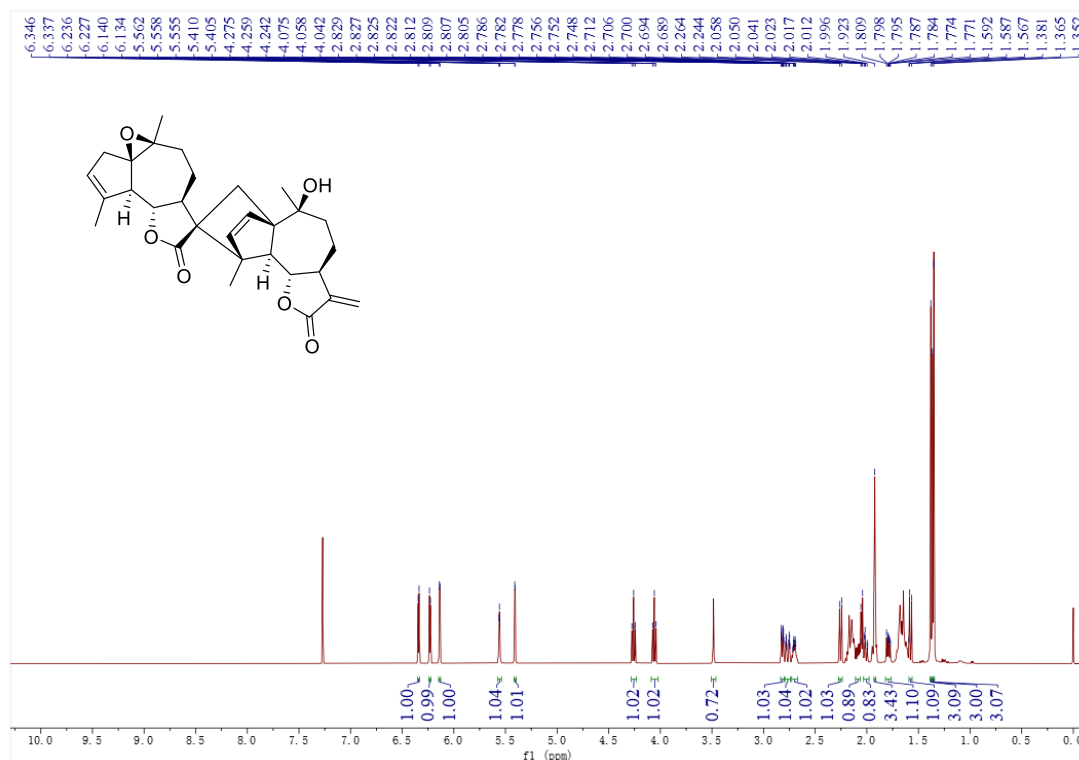

**Figure S161**  $^1\text{H}$  NMR spectrum (600 MHz) of artematrolide M (**17**) in  $\text{CDCl}_3$ .

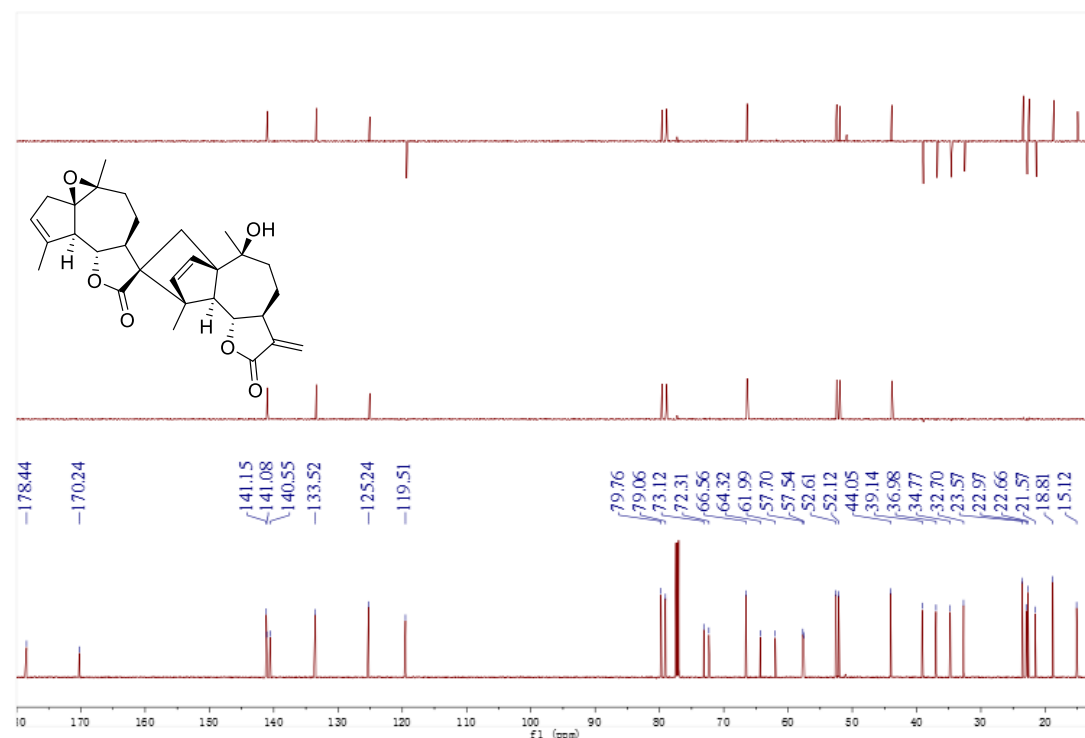

**Figure S162**  $^{13}\text{C}$  NMR spectrum (150 MHz) of artematrolide M (**17**) in  $\text{CDCl}_3$ .

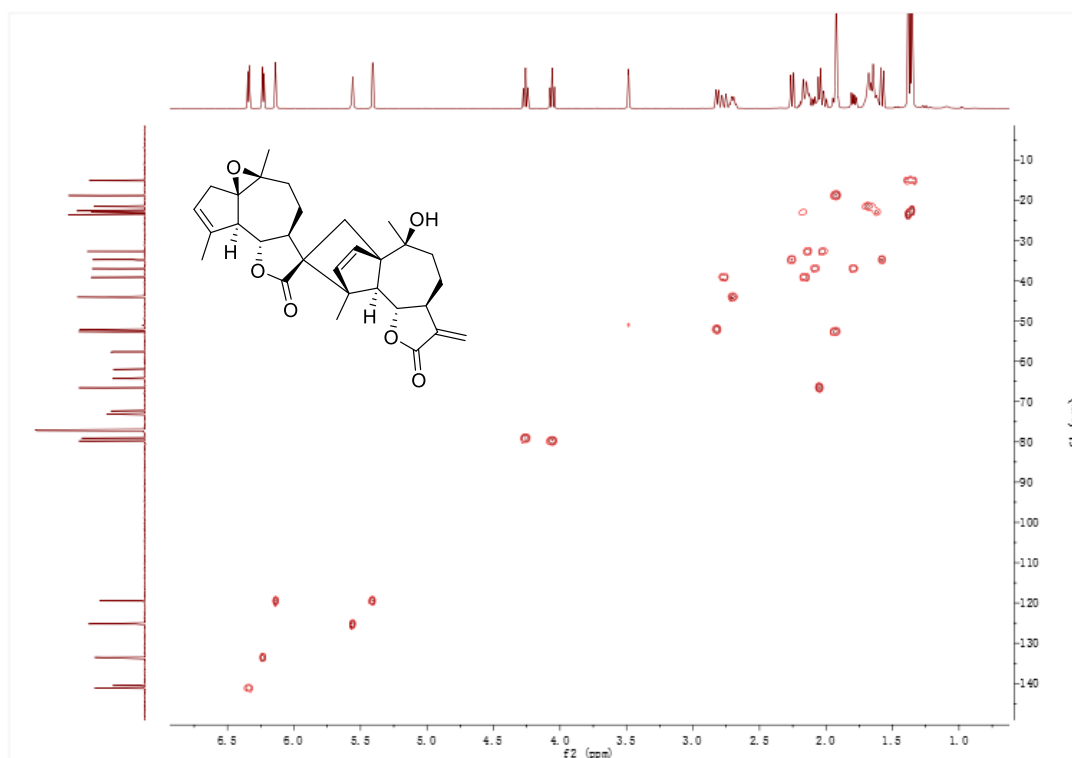

**Figure S163** HSQC spectrum (600 MHz) of artematrolide M (17) in CDCl<sub>3</sub>.

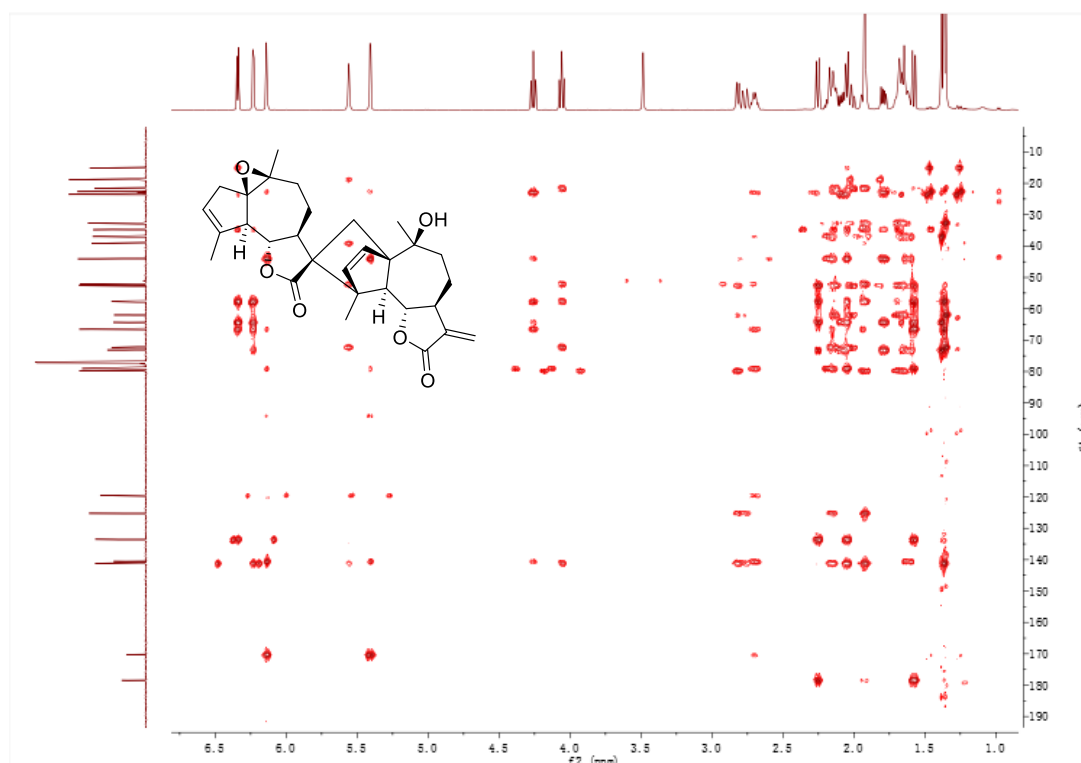

**Figure S164** HMBC spectrum (600 MHz) of artematrolide M (17) in CDCl<sub>3</sub>.

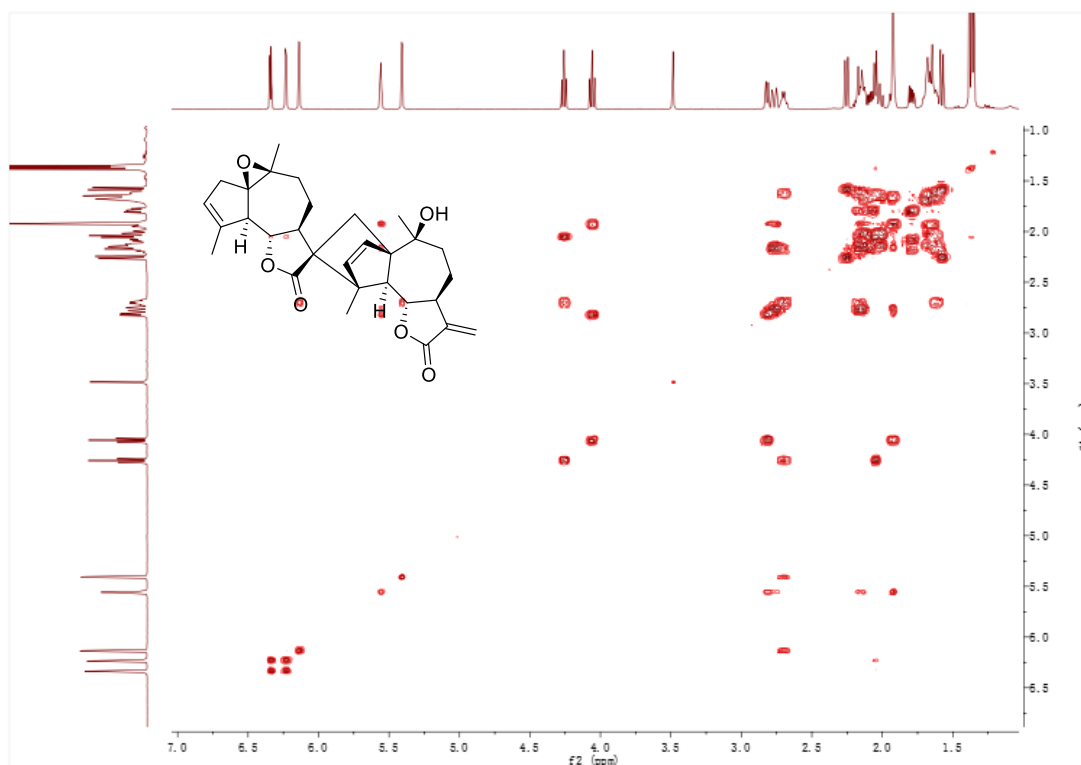

**Figure S165**  $^1\text{H}$ - $^1\text{H}$  COSY spectrum (600 MHz) of artematrolide M (**17**) in  $\text{CDCl}_3$ .

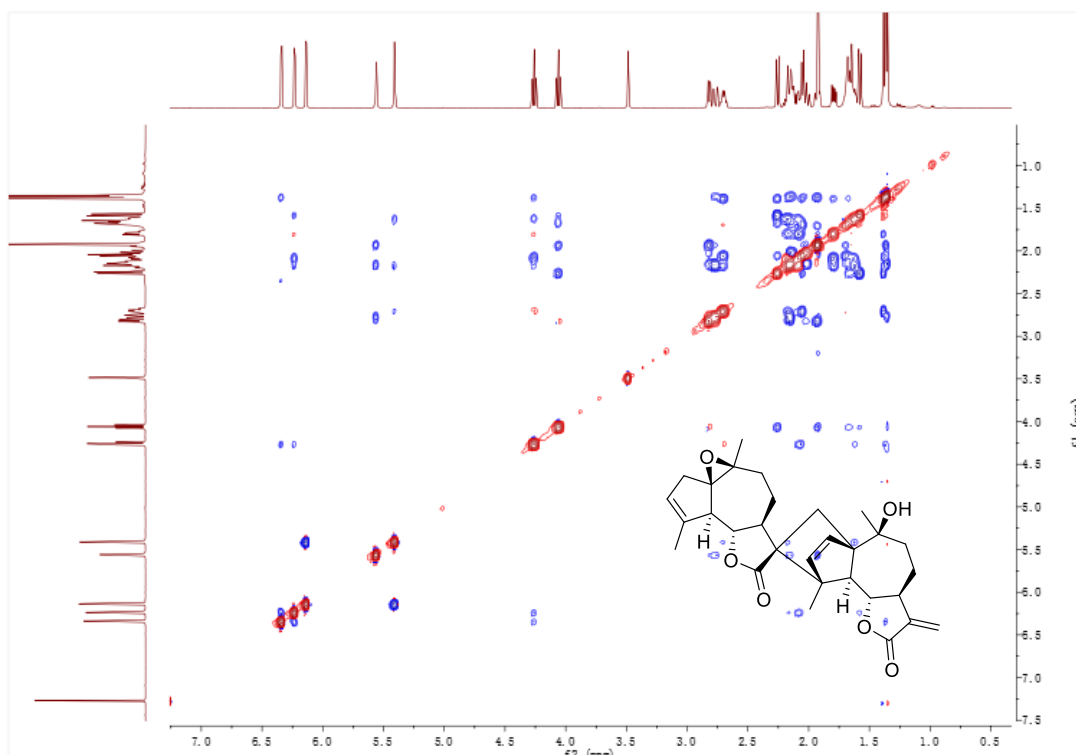

**Figure S166** ROESY spectrum (600 MHz) of artematrolide M (**17**) in  $\text{CDCl}_3$ .

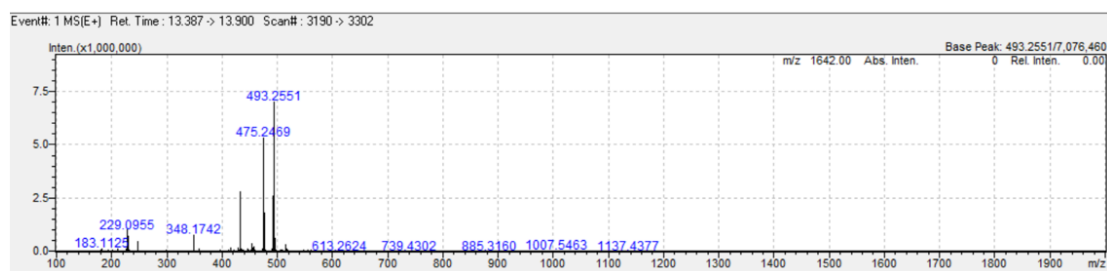

Figure S167 HRESIMS spectrum of artematrolide M (17).

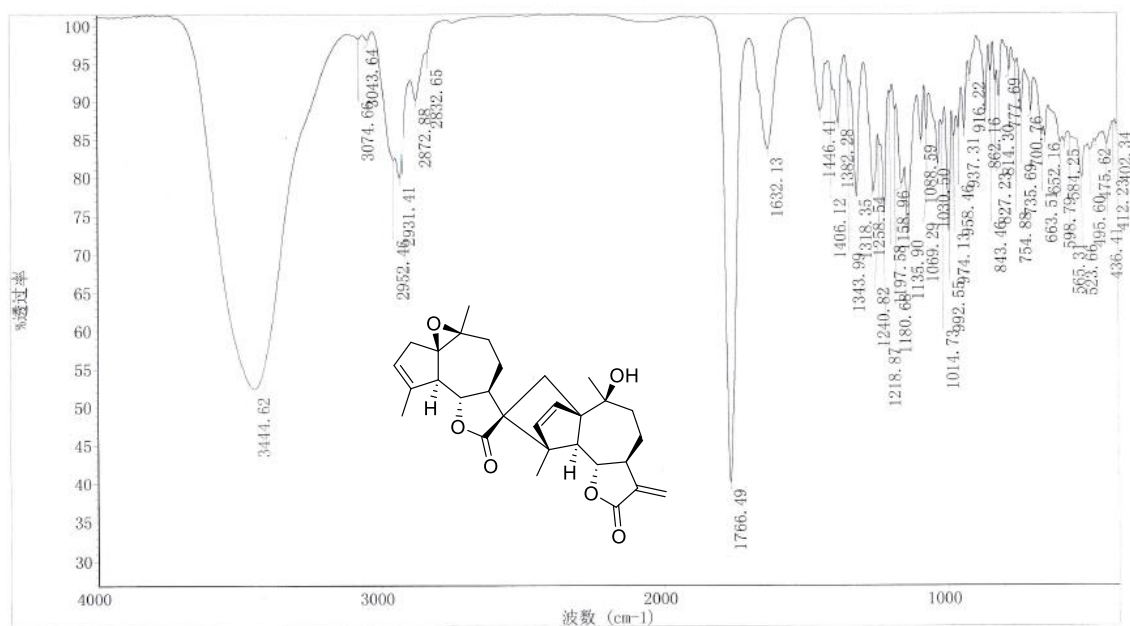

Sample Name: jar150

KBr压片

采集时间: 星期四 1月 02 16:00:11 2020 (GMT+08:00)

仪器型号: NICOLET iS10

Software version: OMNIC 9.8.372

样品扫描次数: 16  
背景扫描次数: 16  
分辨率: 4.000  
采样增益: 1.0  
动镜速度: 0.4747  
光阑: 80.00

Figure S168 IR spectrum of artematrolide M (17).

### Rudolph Research Analytical

This sample was measured on an Autopol VI, Serial #91058  
Manufactured by Rudolph Research Analytical, Hackettstown, NJ, USA.

Measurement Date : Monday, 07-SEP-2020

Set Temperature : OFF

Time Delay : Disabled

Delay between Measurement : Disabled

| n | Average | Std.Dev. | % RSD | Maximum | Minimum |
|---|---------|----------|-------|---------|---------|
| 5 | 40.21   | 0.49     | 1.21  | 40.78   | 39.48   |

| S.No | Sample ID | Time        | Result | Scale | OR °Arc | WLG.nm | Lg.mm  | Conc.g/100ml | Temp. |
|------|-----------|-------------|--------|-------|---------|--------|--------|--------------|-------|
| 1    | JAR150    | 05:05:47 PM | 40.78  | SR    | 0.0469  | 589    | 100.00 | 0.115        | 25.0  |
| 2    | JAR150    | 05:05:55 PM | 40.43  | SR    | 0.0465  | 589    | 100.00 | 0.115        | 25.0  |
| 3    | JAR150    | 05:06:04 PM | 40.35  | SR    | 0.0464  | 589    | 100.00 | 0.115        | 25.0  |
| 4    | JAR150    | 05:06:11 PM | 40.00  | SR    | 0.0460  | 589    | 100.00 | 0.115        | 25.0  |
| 5    | JAR150    | 05:06:20 PM | 39.48  | SR    | 0.0454  | 589    | 100.00 | 0.115        | 25.0  |

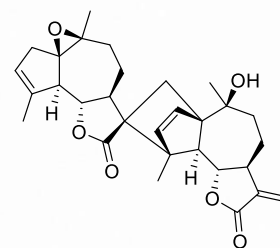

Figure S169 Optical rotation spectrum of artematrolide M (17).



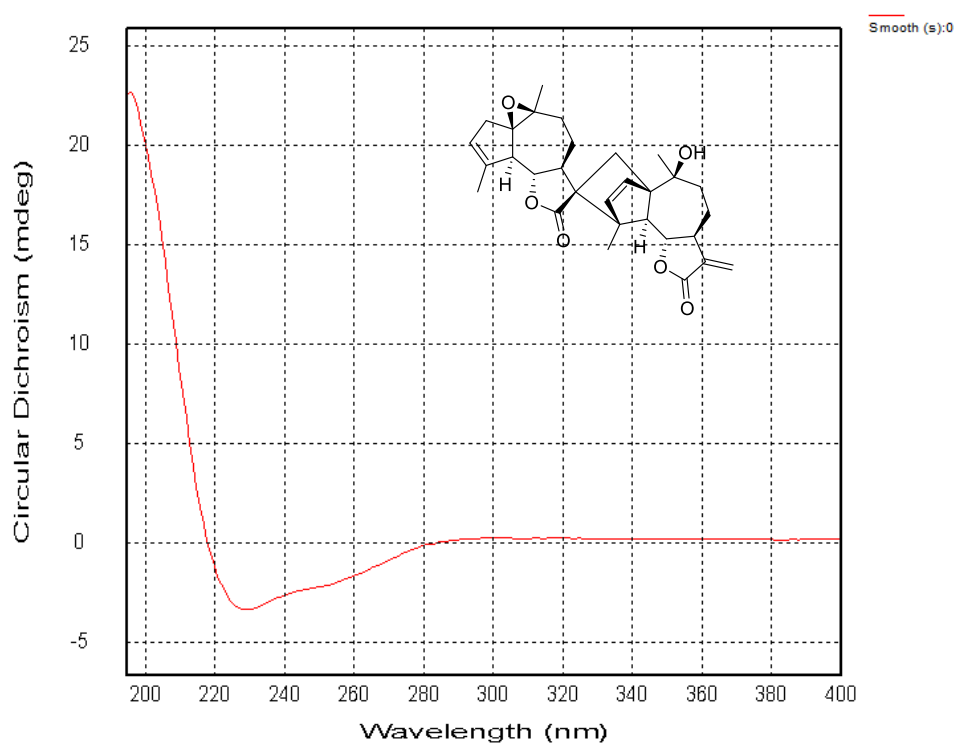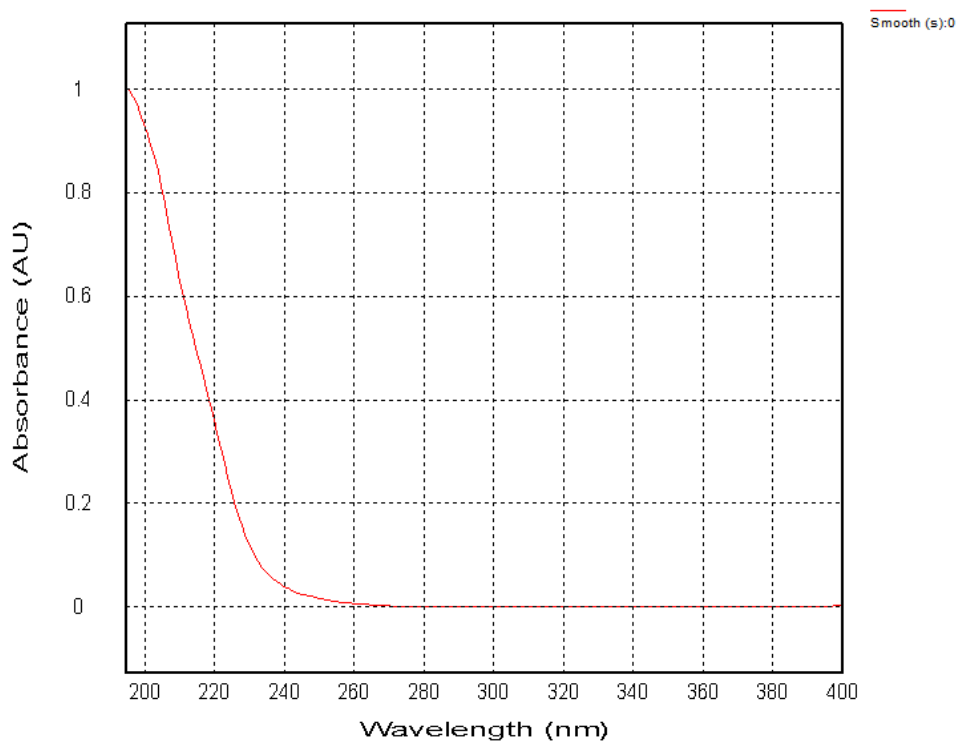

**Figure S170** CD (top) and UV (bottom) spectra of artematrolide M (**17**).

## 19. NMR, MS, IR, $[\alpha]_D$ and CD spectra of compound 18

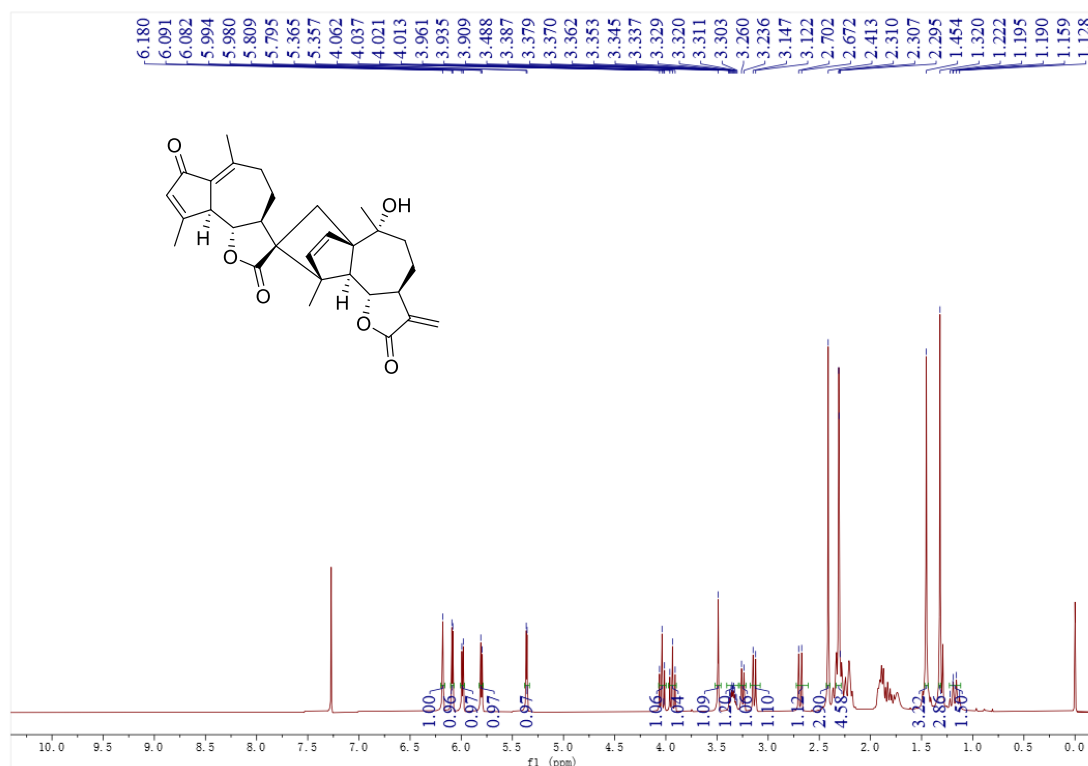

**Figure S171**  $^1\text{H}$  NMR spectrum (400 MHz) of artematrolide N (**18**) in  $\text{CDCl}_3$ .

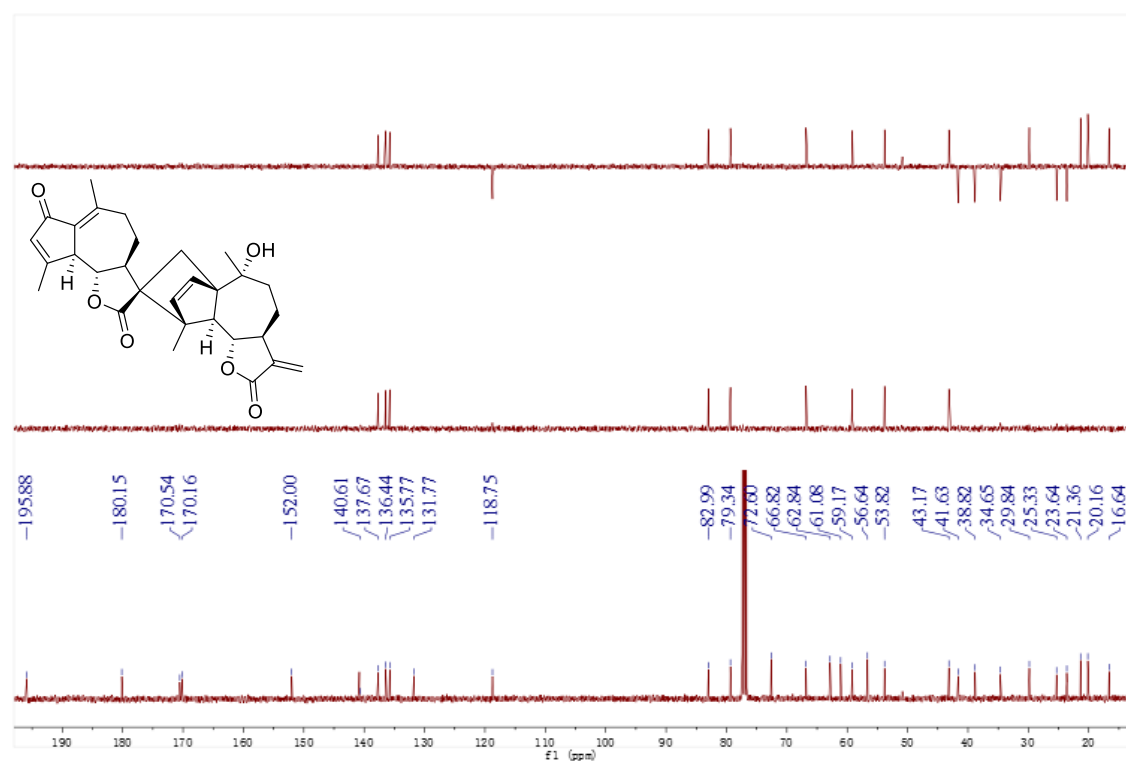

**Figure S172**  $^{13}\text{C}$  NMR spectrum (100 MHz) of artematrolide N (**18**) in  $\text{CDCl}_3$ .

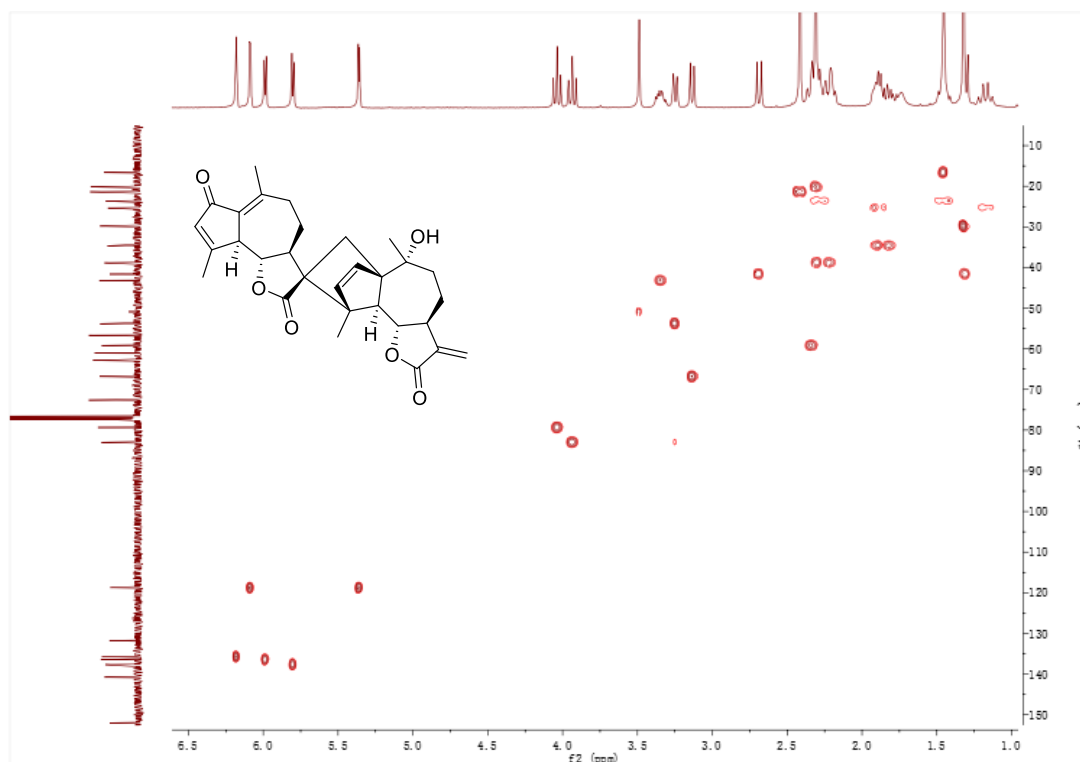

**Figure S173** HSQC spectrum (600 MHz) of artematrolide N (**18**) in  $\text{CDCl}_3$ .

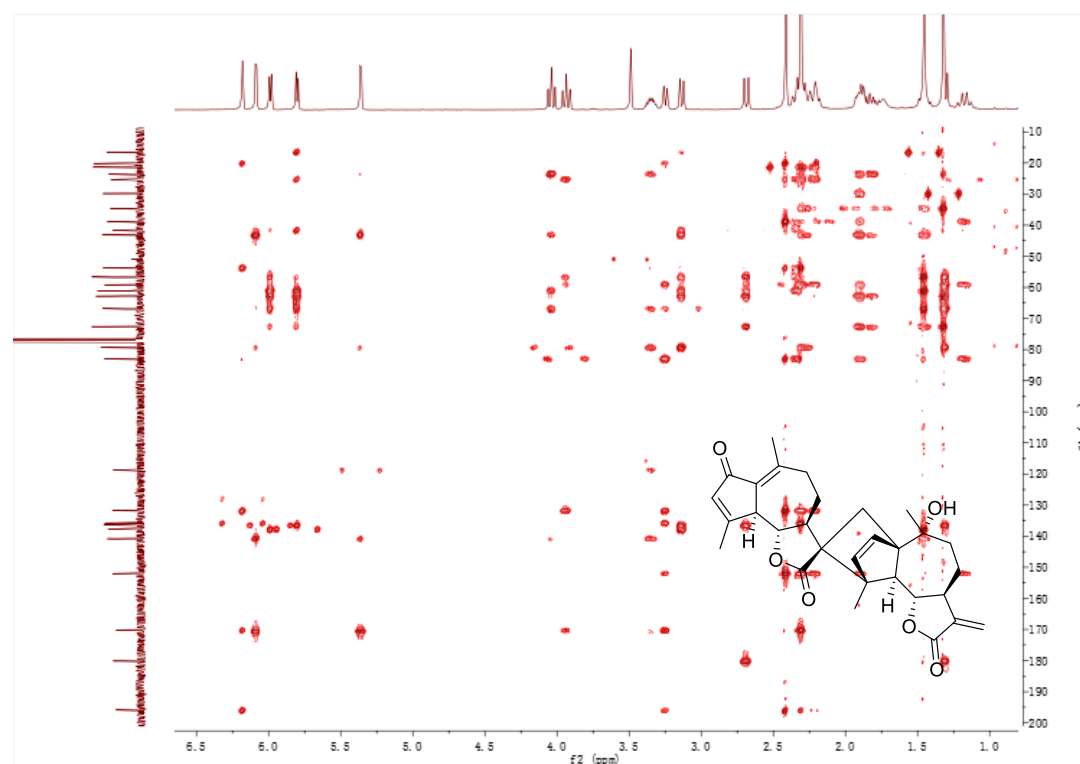

**Figure S174** HMBC spectrum (600 MHz) of artematrolide N (**18**) in  $\text{CDCl}_3$ .

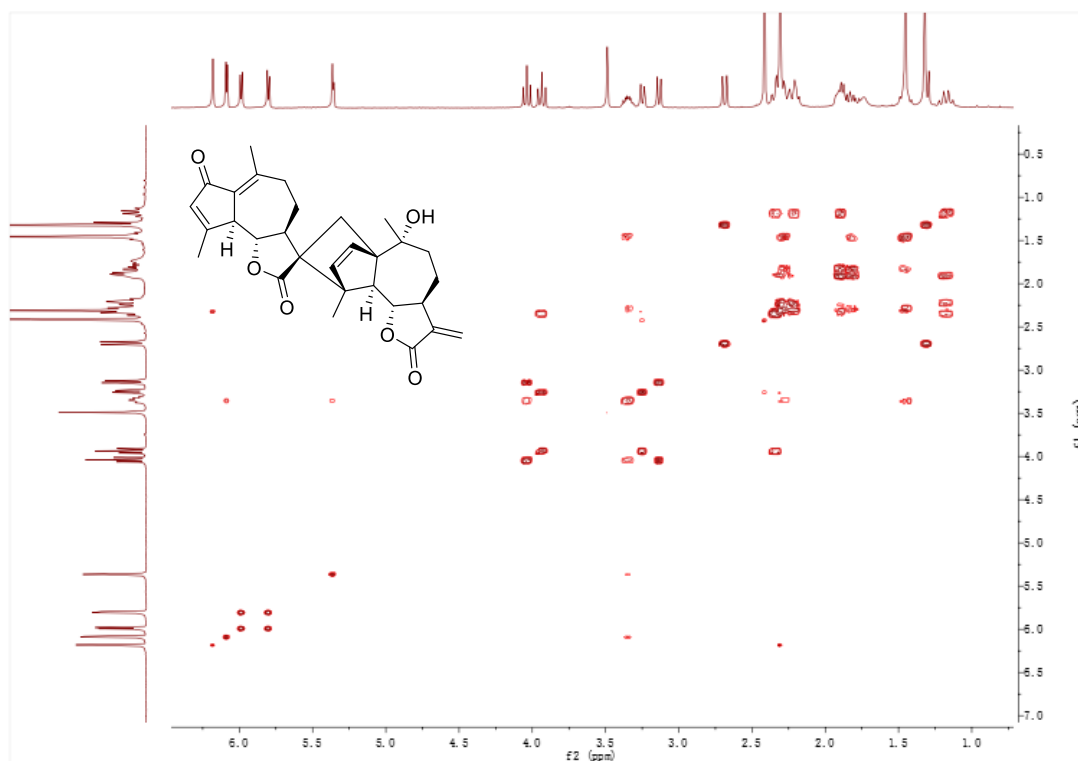

**Figure S175**  $^1\text{H}$ - $^1\text{H}$  COSY spectrum (600 MHz) of artematrolide N (**18**) in  $\text{CDCl}_3$ .

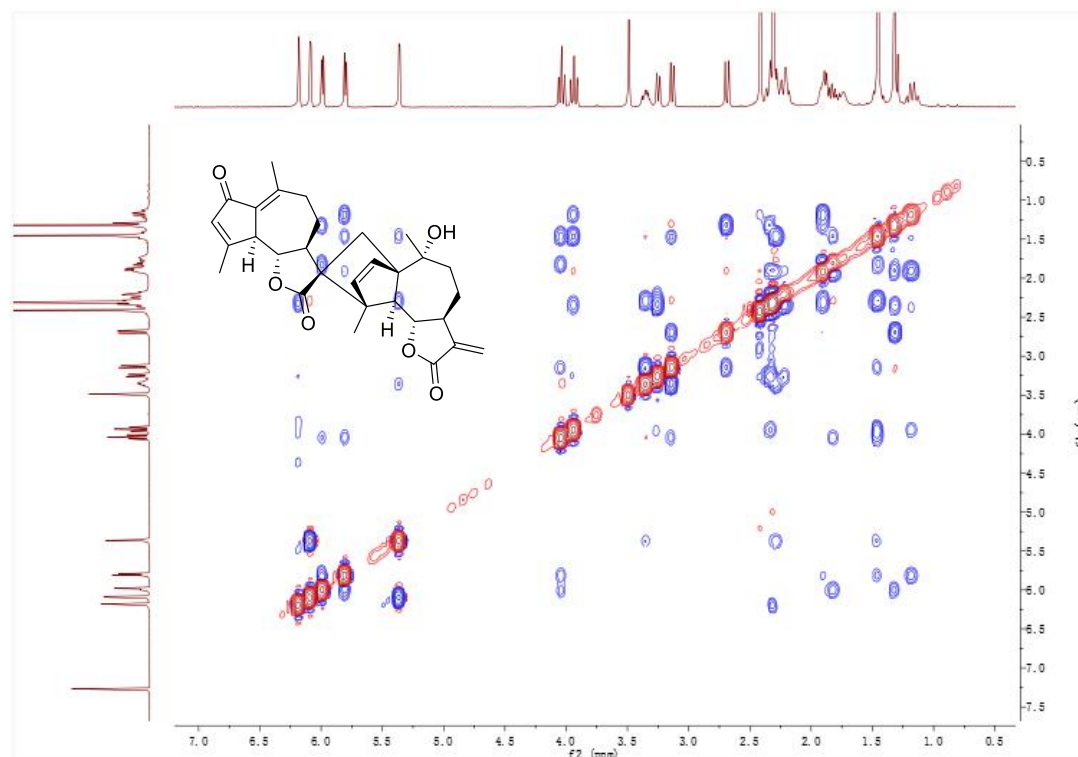

**Figure S176** ROESY spectrum (600 MHz) of artematrolide N (**18**) in  $\text{CDCl}_3$ .

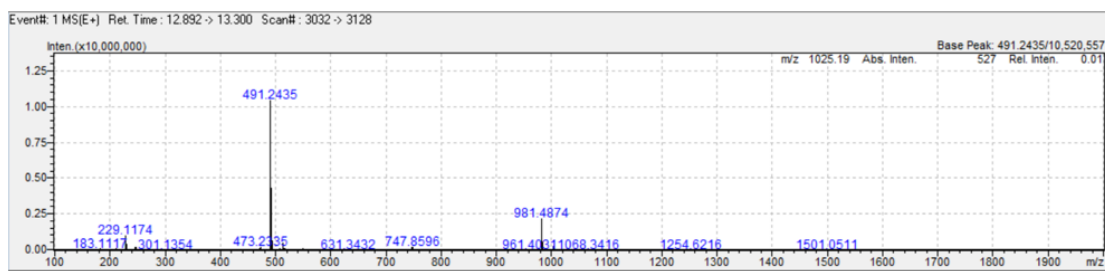

Figure S177 HRESIMS spectrum of artematrolide N (18).

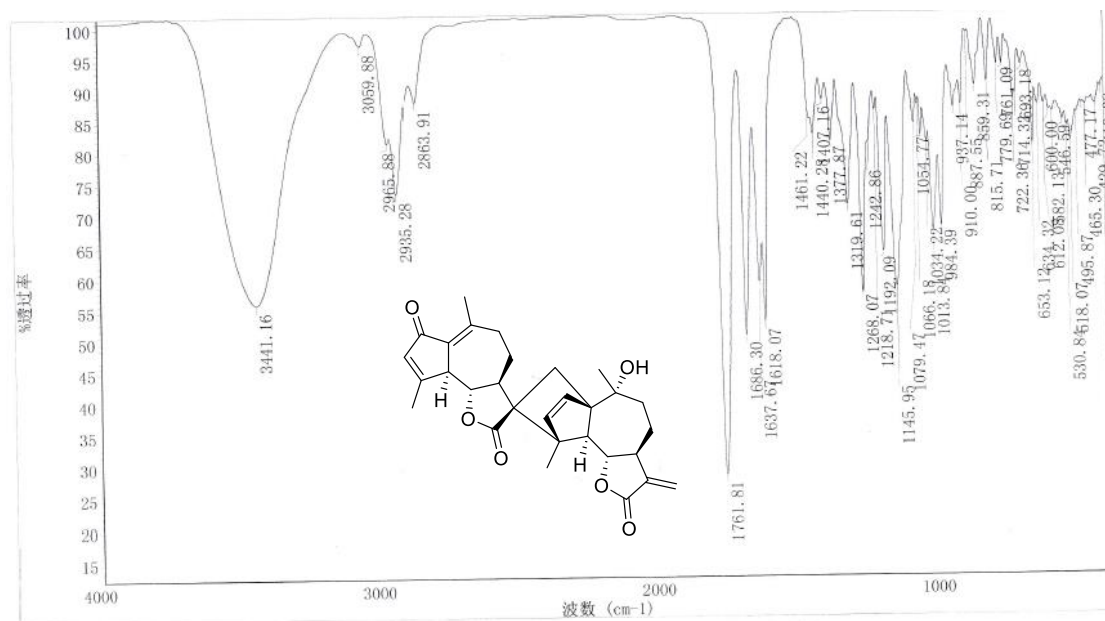

Sample Name: jar153  
 KBr压片  
 采集时间: 星期五 1月 10 15:46:08 2020 (GMT+08:00)  
 仪器型号: NICOLET iS10  
 Software version: OMNIC 9.8.372

样品扫描次数: 16  
 背景扫描次数: 16  
 分辨率: 4.000  
 采样增益: 1.0  
 动镜速度: 0.4747  
 光阑: 80.00

Figure S178 IR spectrum of artematrolide N (18).

**Rudolph Research Analytical**

This sample was measured on an Autopol VI, Serial #91058  
 Manufactured by Rudolph Research Analytical, Hackettstown, NJ, USA.

Measurement Date : Saturday, 04-JAN-2020

Set Temperature : OFF

Time Delay : Disabled

Delay between Measurement : Disabled

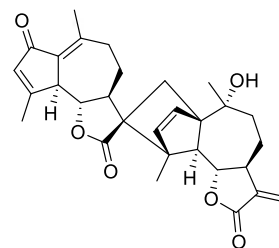

| n | Average | Std.Dev. | % RSD | Maximum | Minimum |
|---|---------|----------|-------|---------|---------|
| 5 | 38.38   | 0.25     | 0.65  | 38.67   | 38.07   |

| S.No | Sample ID | Time        | Result | Scale | OR °Arc | WLG.nm | Lg.mm  | Conc.g/100ml | Temp. |
|------|-----------|-------------|--------|-------|---------|--------|--------|--------------|-------|
| 1    | jar153    | 02:11:18 PM | 38.67  | SR    | 0.0321  | 589    | 100.00 | 0.083        | 23.0  |
| 2    | jar153    | 02:11:27 PM | 38.07  | SR    | 0.0316  | 589    | 100.00 | 0.083        | 23.0  |
| 3    | jar153    | 02:11:34 PM | 38.55  | SR    | 0.0320  | 589    | 100.00 | 0.083        | 22.9  |
| 4    | jar153    | 02:11:43 PM | 38.19  | SR    | 0.0317  | 589    | 100.00 | 0.083        | 22.9  |
| 5    | jar153    | 02:11:51 PM | 38.43  | SR    | 0.0319  | 589    | 100.00 | 0.083        | 22.9  |

Figure S179 Optical rotation spectrum of artematrolide N (18).

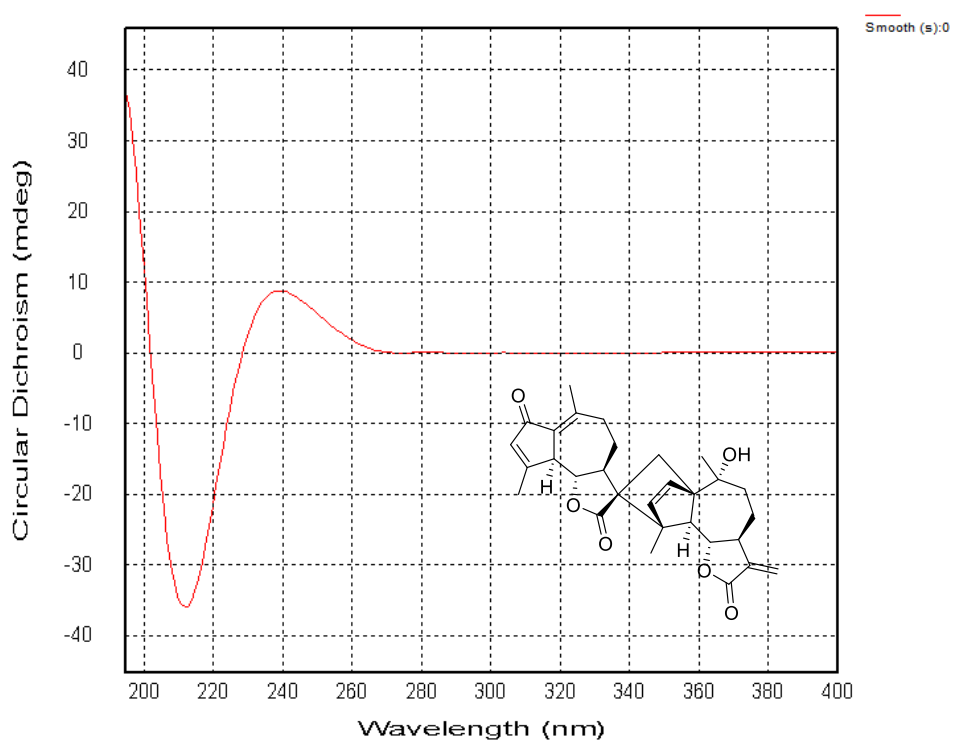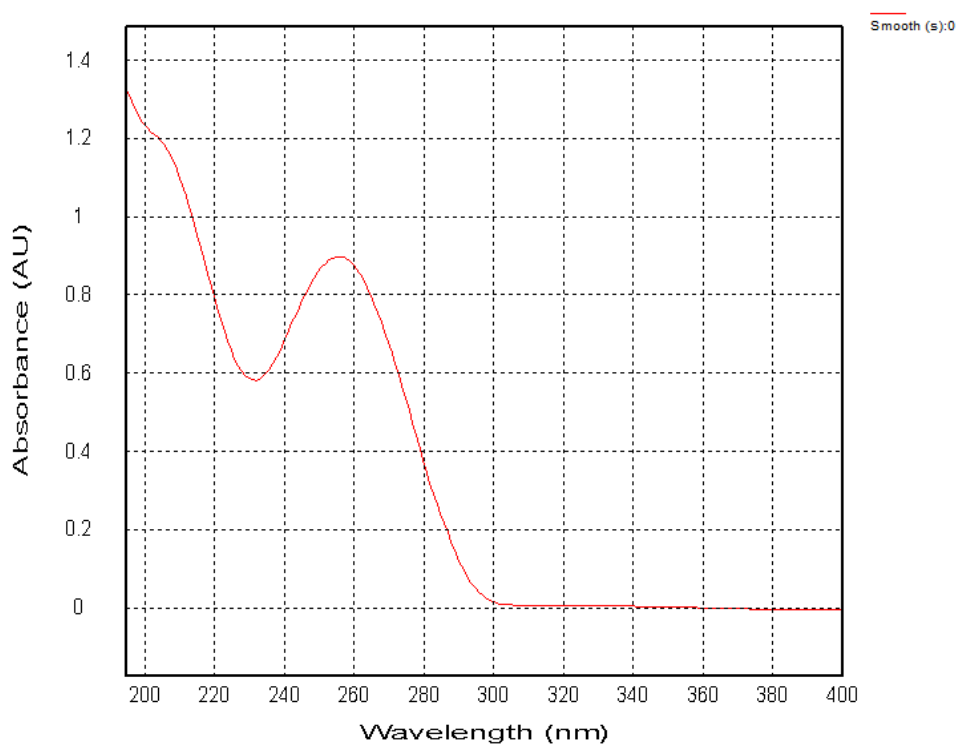

**Figure S180** CD (top) and UV (bottom) spectra of artematrolide N (**18**).

## 20. NMR, MS, IR, $[\alpha]_D$ and CD spectra of compound 19

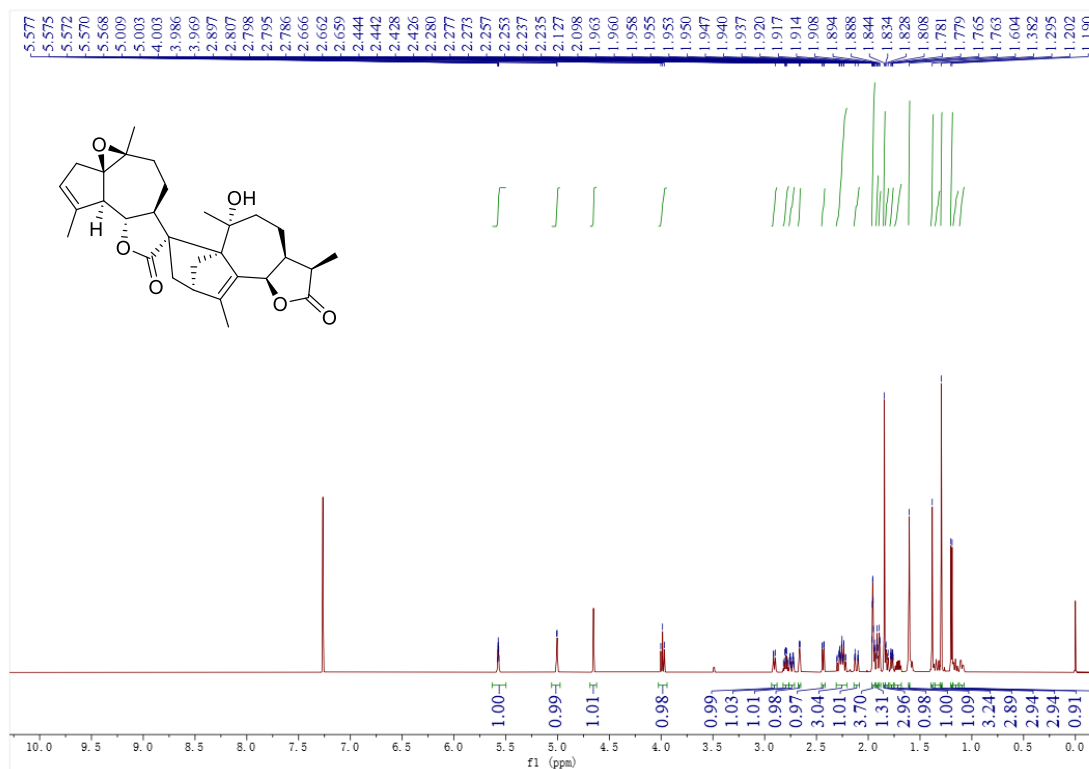

**Figure S181**  $^1\text{H}$  NMR spectrum (600 MHz) of artematrolide O (**19**) in  $\text{CDCl}_3$ .

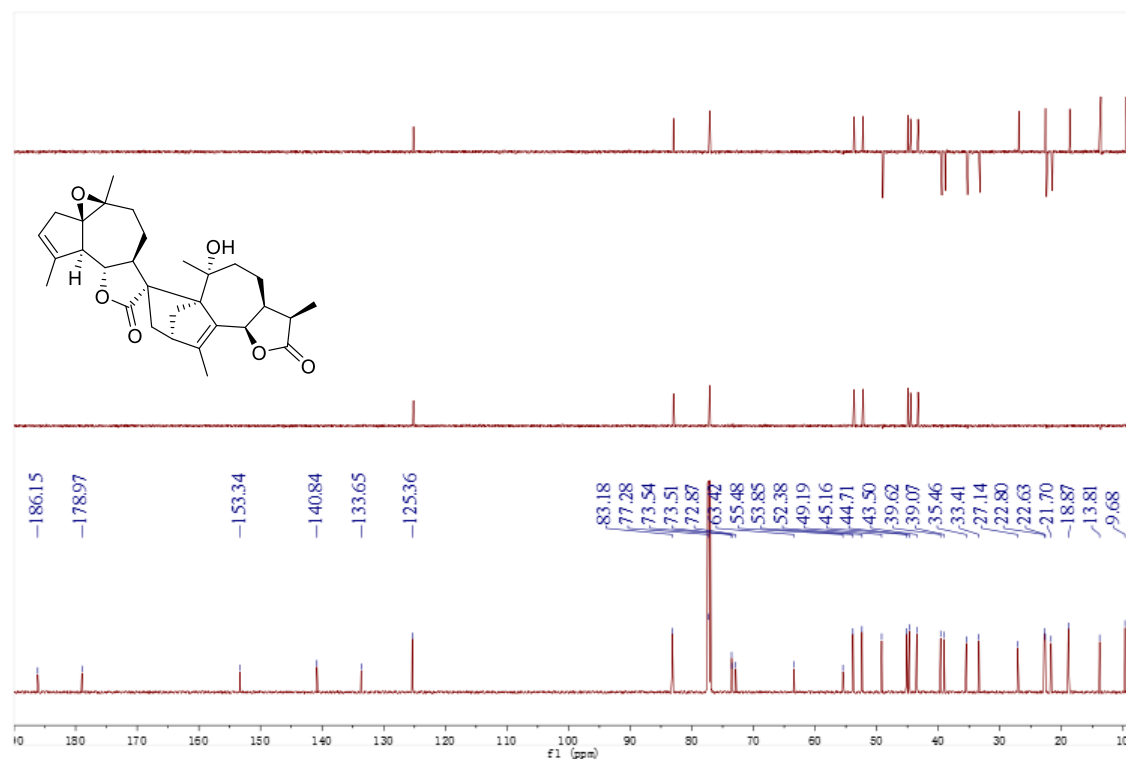

**Figure S182**  $^{13}\text{C}$  NMR spectrum (150 MHz) of artematrolide O (**19**) in  $\text{CDCl}_3$ .

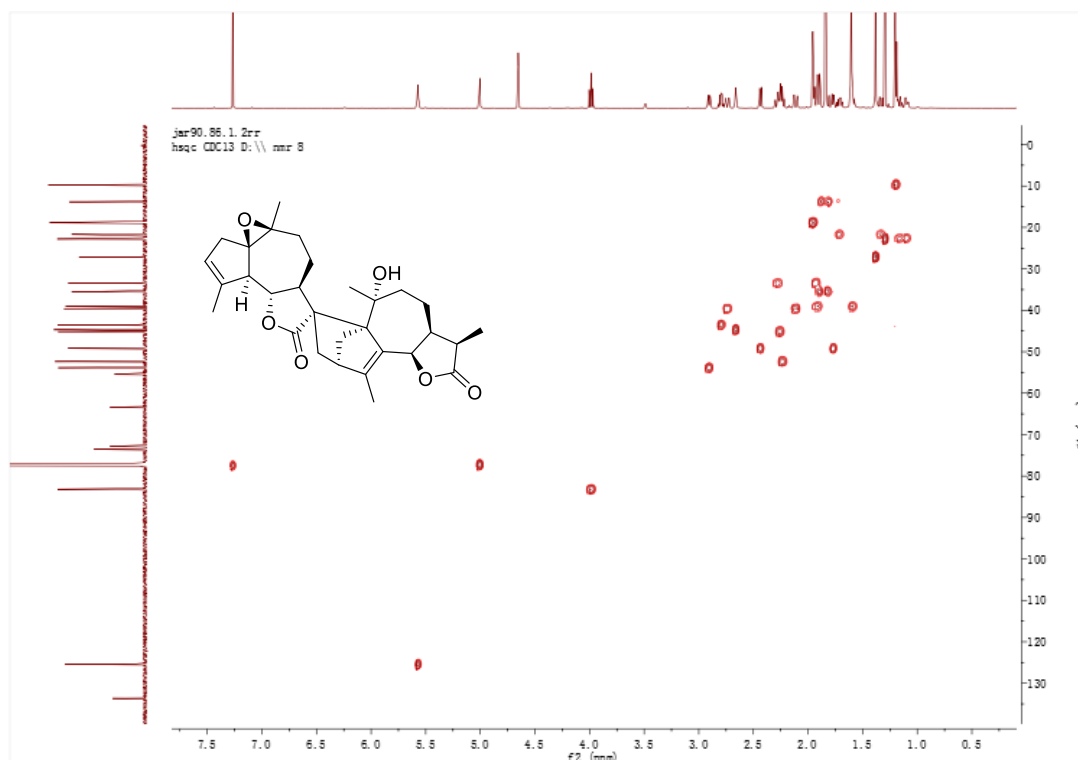

**Figure S183** HSQC spectrum (600 MHz) of artematrolide O (**19**) in CDCl<sub>3</sub>.

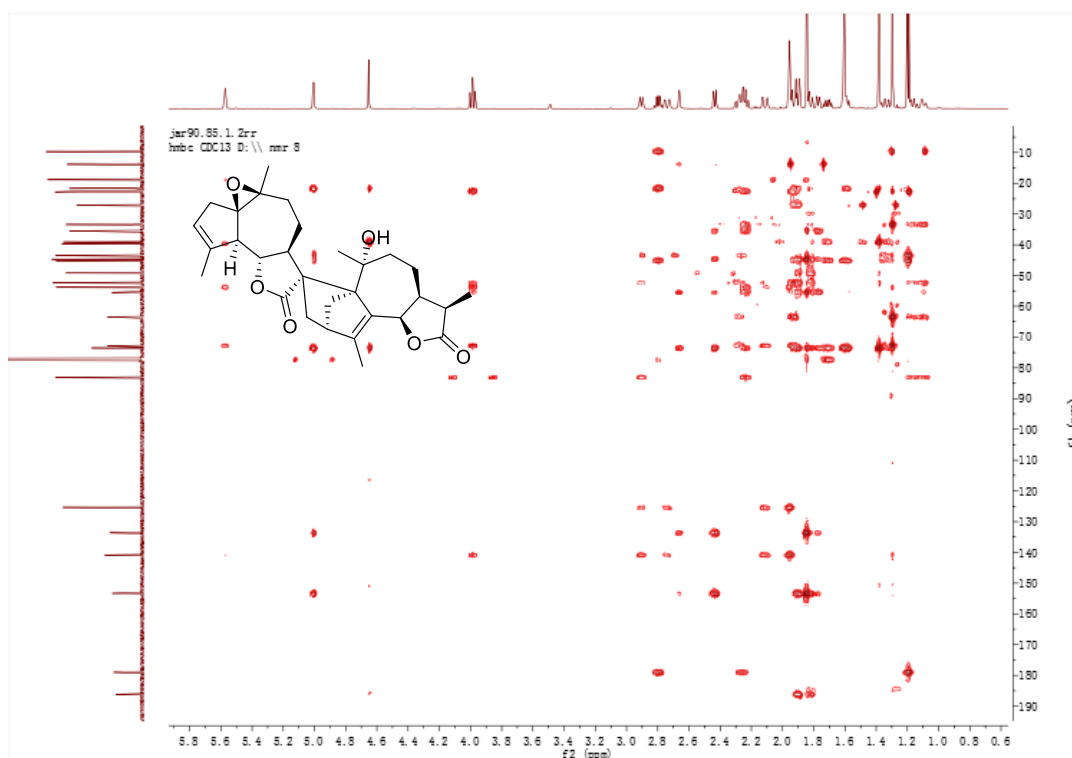

**Figure S184** HMBC spectrum (600 MHz) of artematrolide O (**19**) in CDCl<sub>3</sub>.



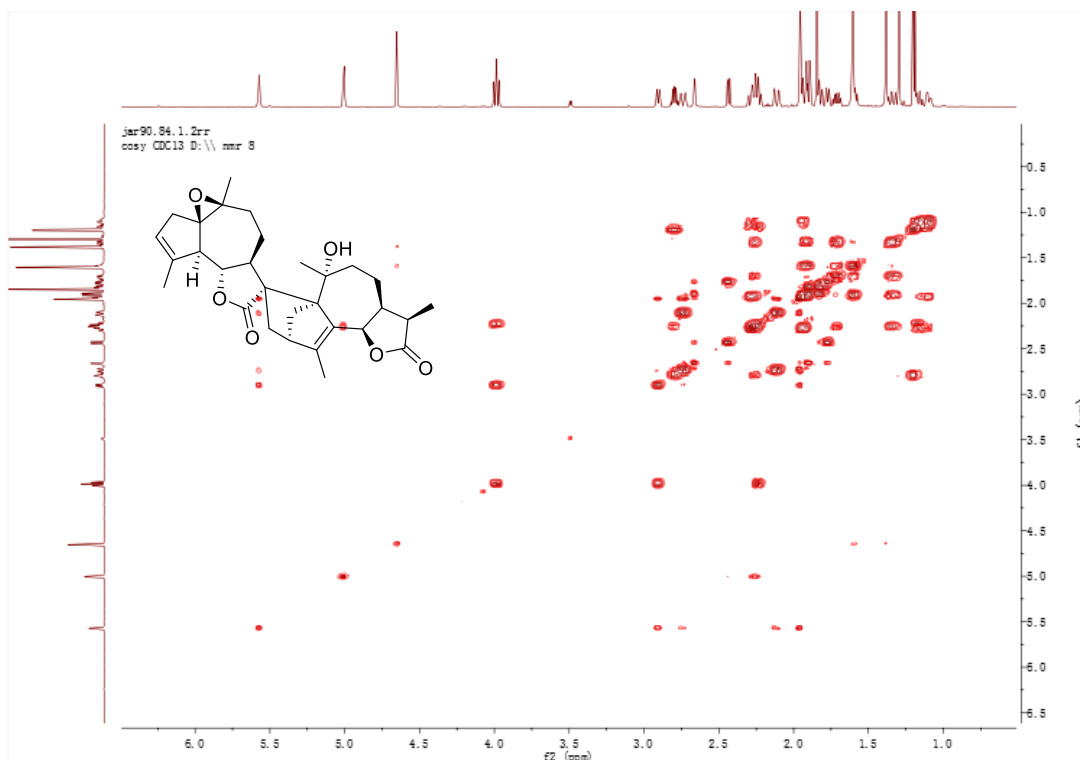

**Figure S185**  $^1\text{H}$ - $^1\text{H}$  COSY spectrum (600 MHz) of artematrolide O (**19**) in  $\text{CDCl}_3$ .

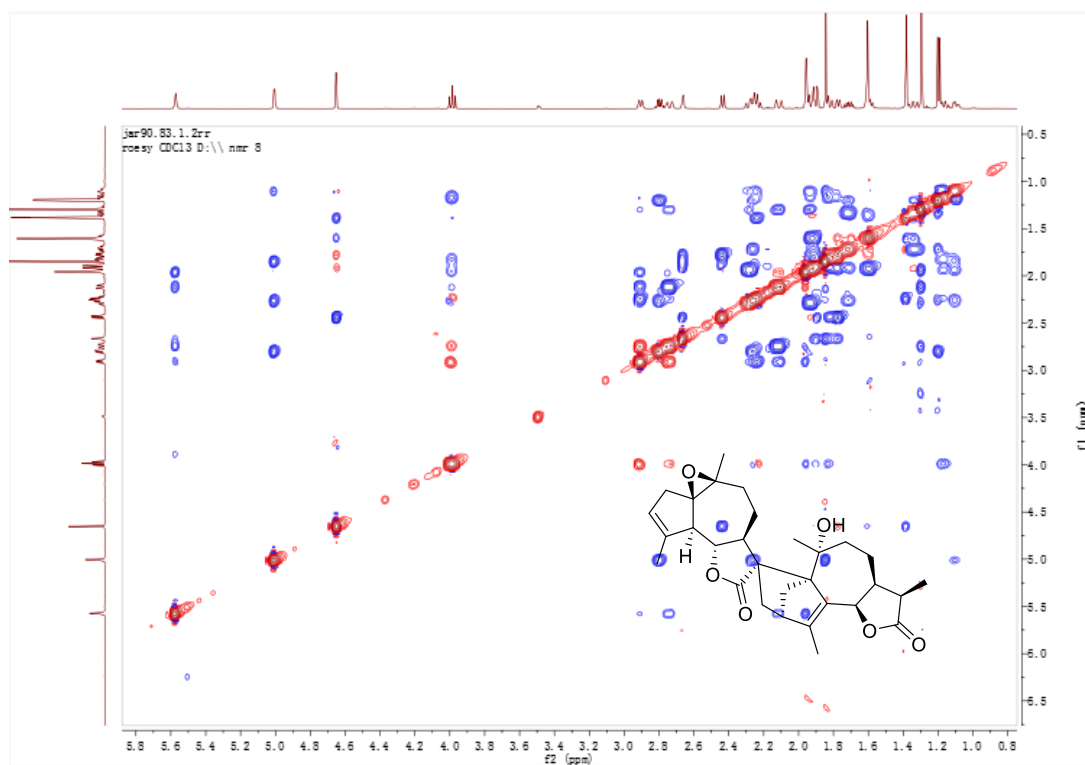

**Figure S186** ROESY spectrum (600 MHz) of artematrolide O (**19**) in  $\text{CDCl}_3$ .

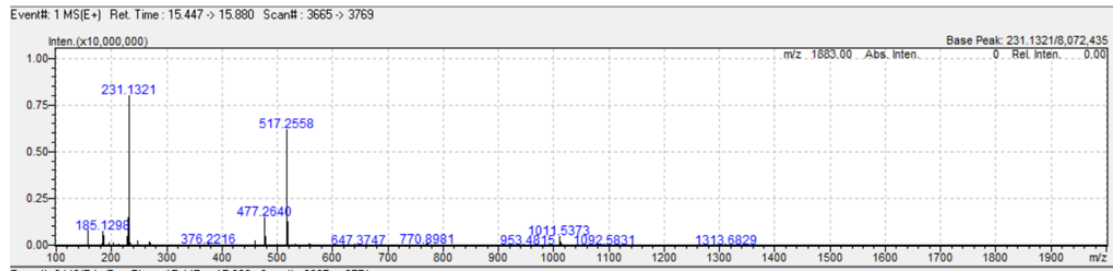

Figure S187 HRESIMS spectrum of artematrolide O (19).

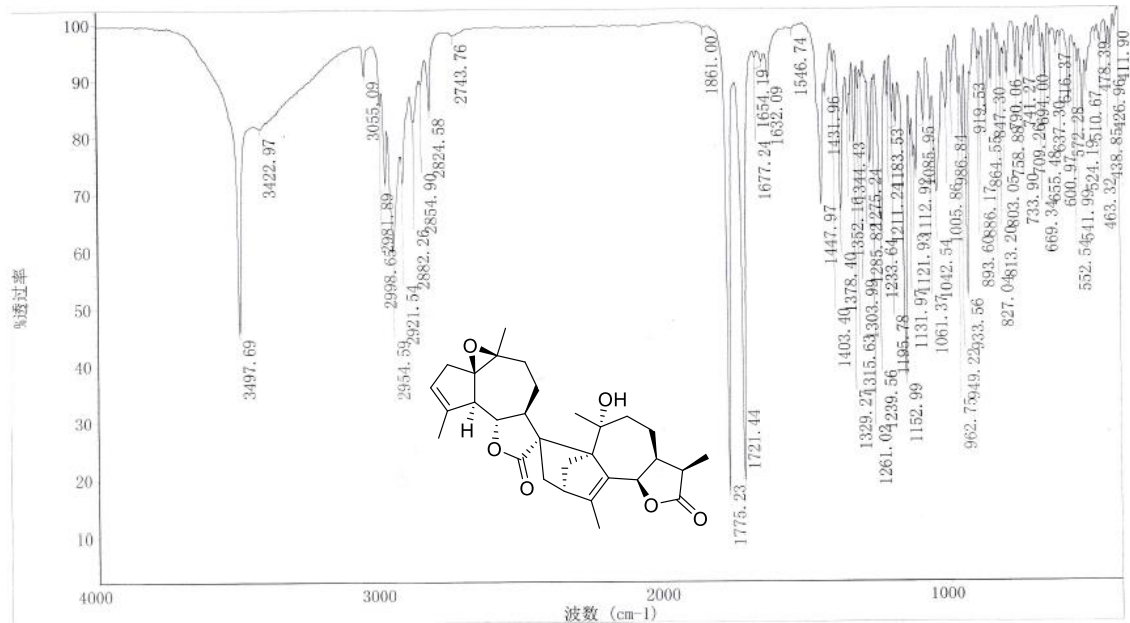

Sample Name: jar90  
 KBr压片  
 采集时间: 星期一 1月 13 13:17:53 2020 (GMT+08:00)  
 仪器型号: NICOLET IS10  
 Software version: OMNIC 9.8.372

样品扫描次数: 16  
 背景扫描次数: 16  
 分辨率: 4.000  
 采样增益: 1.0  
 动镜速度: 0.4747  
 光阑: 80.00

Figure S188 IR spectrum of artematrolide O (19).

**Rudolph Research Analytical**

This sample was measured on an Autopol VI, Serial #91058  
 Manufactured by Rudolph Research Analytical, Hackettstown, NJ, USA.  
 Measurement Date : Saturday, 04-JAN-2020  
 Set Temperature : OFF  
 Time Delay : Disabled  
 Delay between Measurement : Disabled

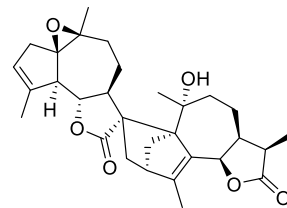

| n | Average | Std.Dev. | % RSD | Maximum | Minimum |
|---|---------|----------|-------|---------|---------|
| 5 | 32.47   | 0.47     | 1.44  | 33.09   | 32.00   |

  

| S.No | Sample ID | Time        | Result | Scale | OR °Arc | WLG.nm | Lg.mm  | Conc.g/100ml | Temp. |
|------|-----------|-------------|--------|-------|---------|--------|--------|--------------|-------|
| 1    | jar90     | 12:58:02 PM | 32.55  | SR    | 0.0179  | 589    | 100.00 | 0.055        | 22.1  |
| 2    | jar90     | 12:58:11 PM | 32.73  | SR    | 0.0180  | 589    | 100.00 | 0.055        | 22.1  |
| 3    | jar90     | 12:58:19 PM | 32.00  | SR    | 0.0176  | 589    | 100.00 | 0.055        | 22.1  |
| 4    | jar90     | 12:58:27 PM | 33.09  | SR    | 0.0182  | 589    | 100.00 | 0.055        | 22.0  |
| 5    | jar90     | 12:58:35 PM | 32.00  | SR    | 0.0176  | 589    | 100.00 | 0.055        | 22.0  |

Figure S189 Optical rotation spectrum of artematrolide O (19).

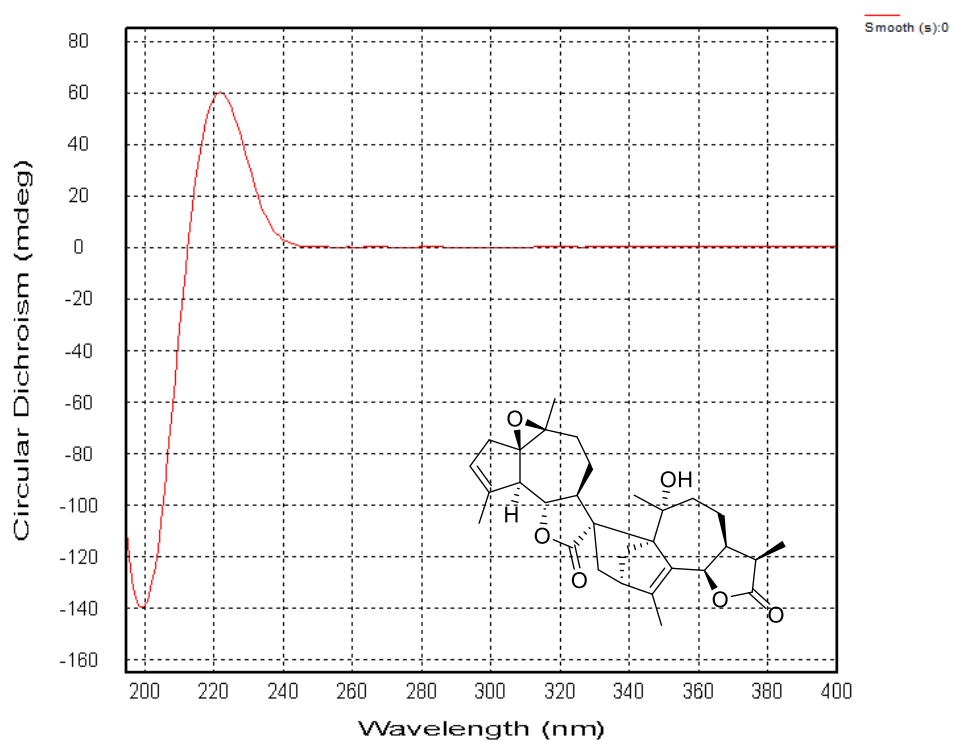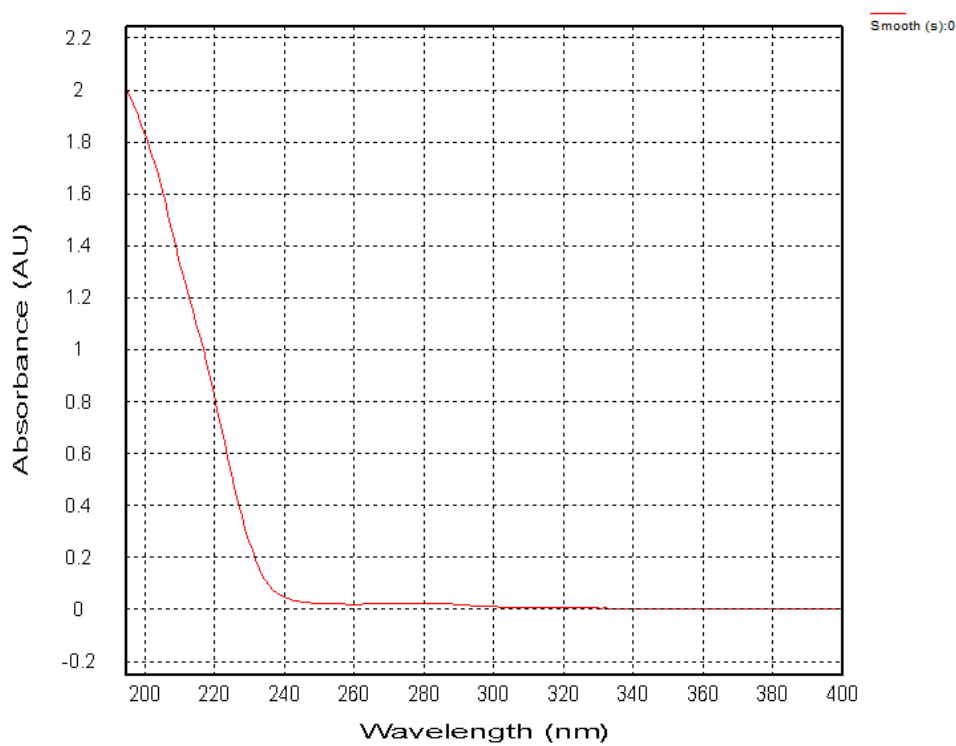

**Figure S190** CD (top) and UV (bottom) spectra of artematrolide O (**19**).

## 21. NMR, MS, IR, $[\alpha]_D$ and CD spectra of compound 20

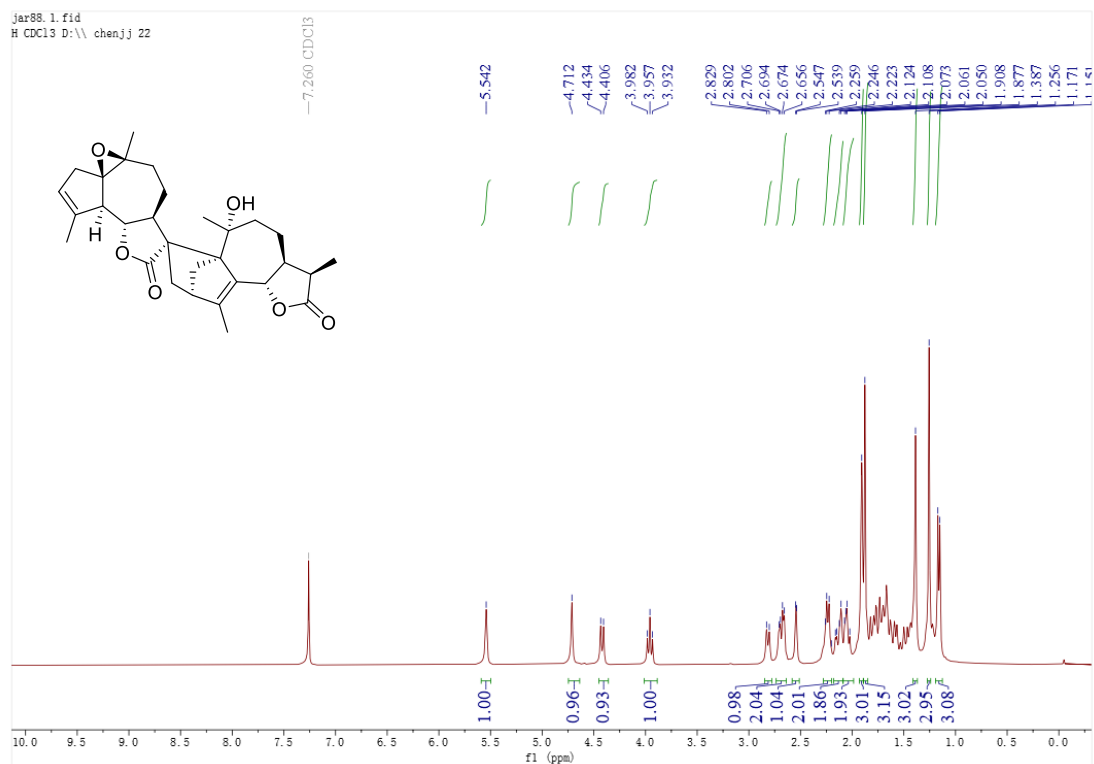

Figure S191  $^1\text{H}$  NMR spectrum (400 MHz) of artematrolide P (20) in  $\text{CDCl}_3$ .

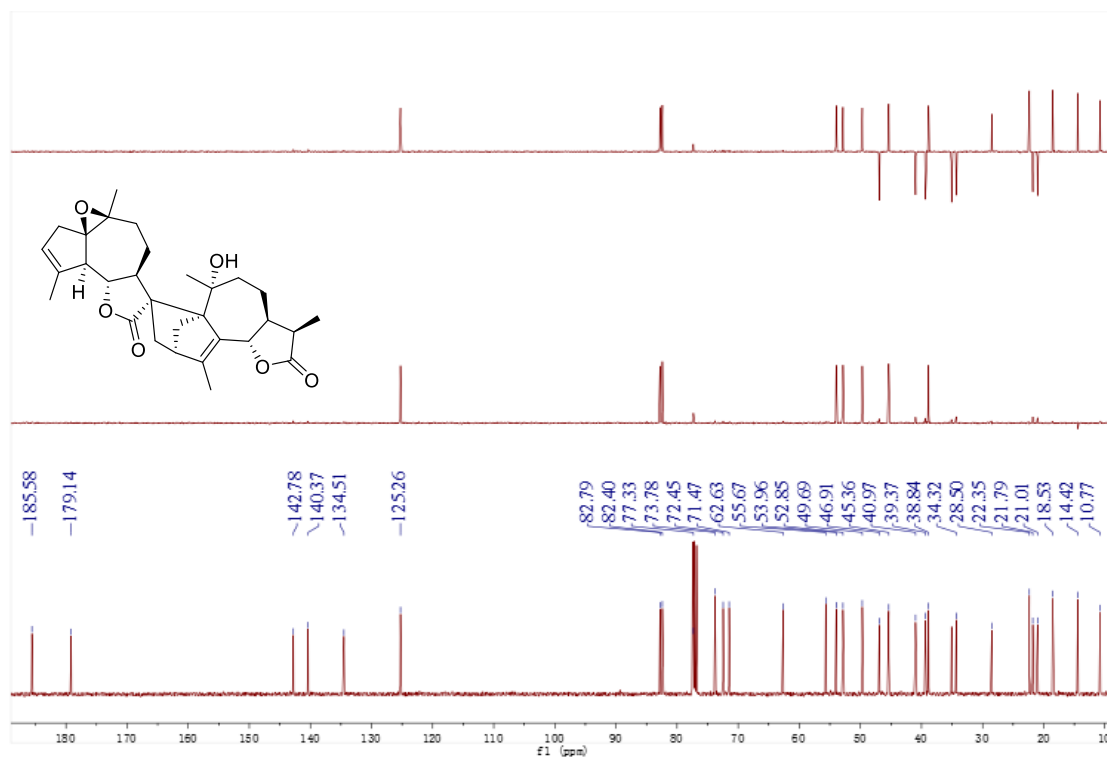

Figure S192  $^{13}\text{C}$  NMR spectrum (100 MHz) of artematrolide P (20) in  $\text{CDCl}_3$ .

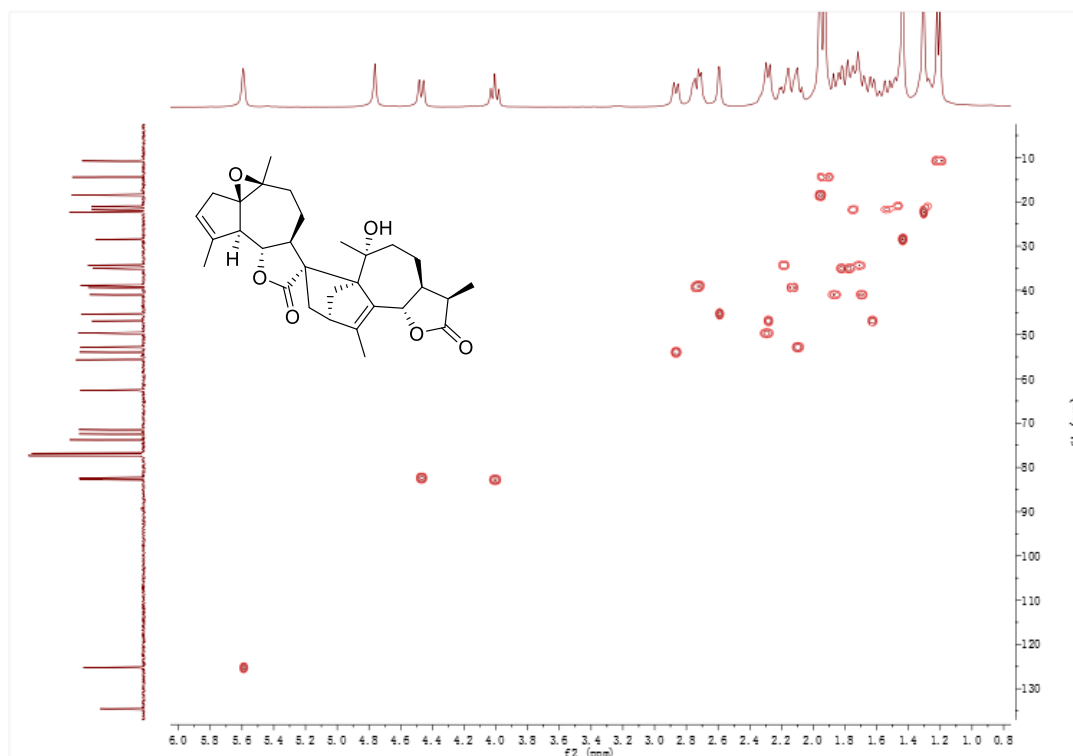

**Figure S193** HSQC spectrum (600 MHz) of artematrolide P (**20**) in  $\text{CDCl}_3$ .

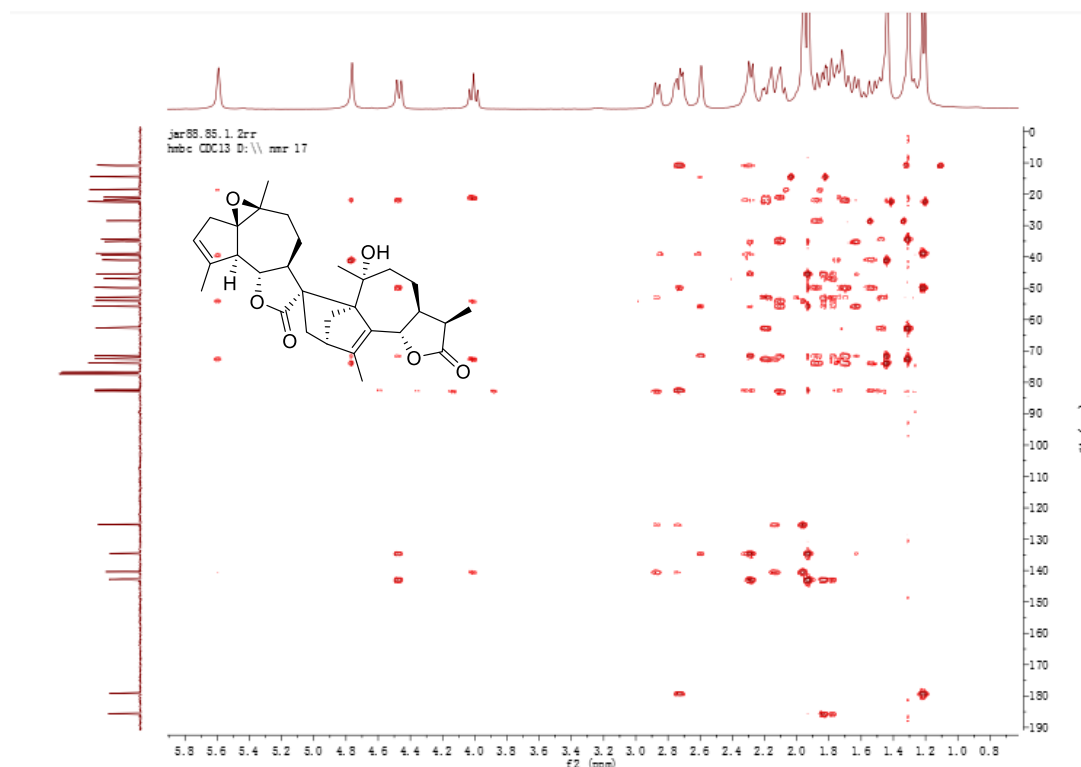

**Figure S194** HMBC spectrum (600 MHz) of artematrolide P (**20**) in  $\text{CDCl}_3$ .

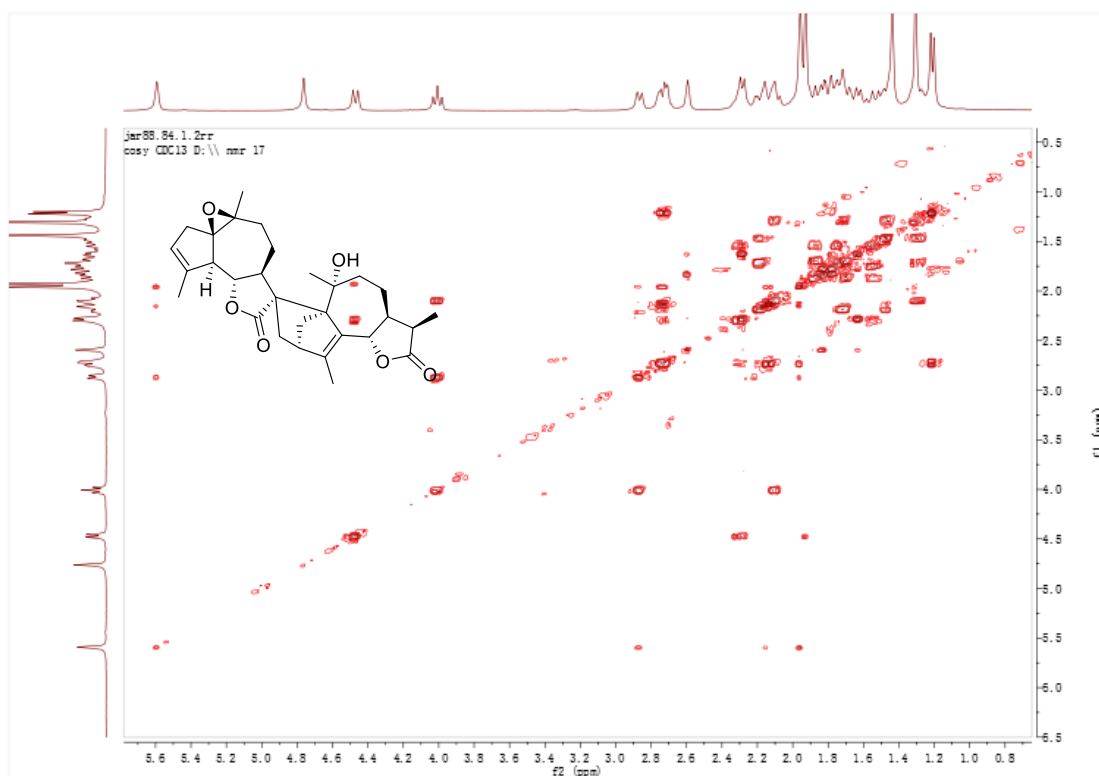

**Figure S195**  $^1\text{H}$ - $^1\text{H}$  COSY spectrum (600 MHz) of artematrolide P (**20**) in  $\text{CDCl}_3$ .

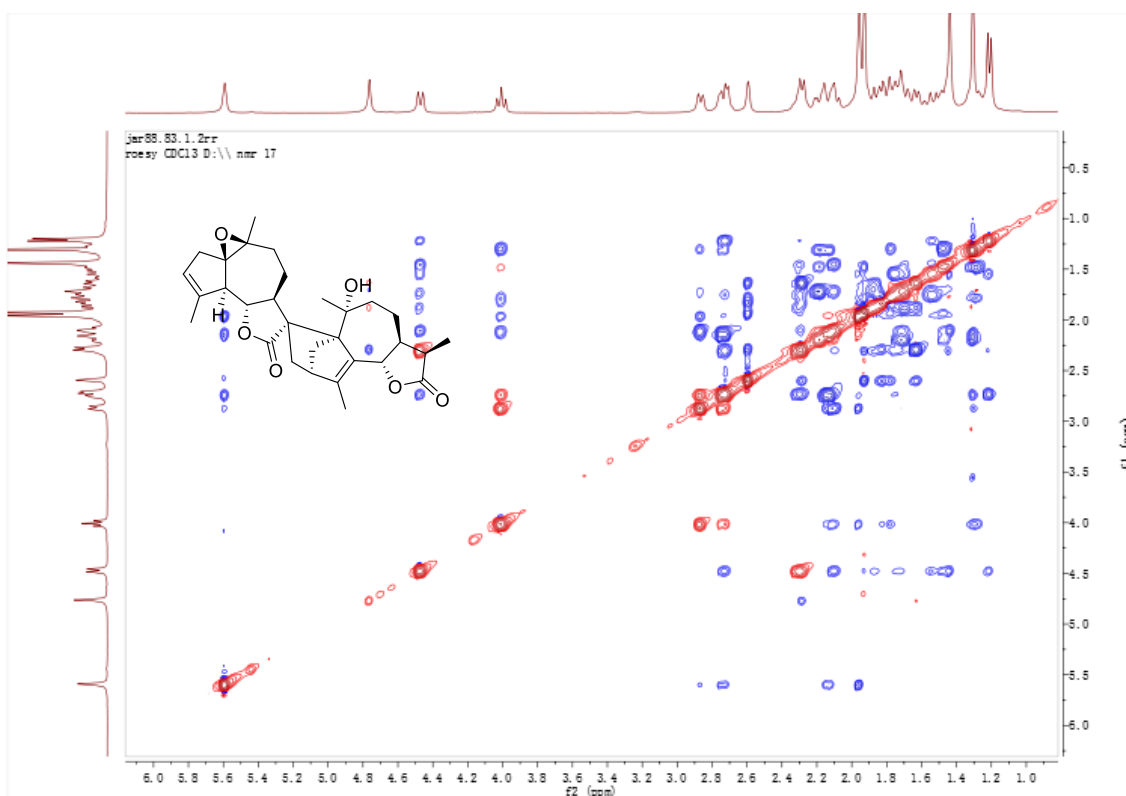

**Figure S196** ROESY spectrum (600 MHz) of artematrolide P (**20**) in  $\text{CDCl}_3$ .

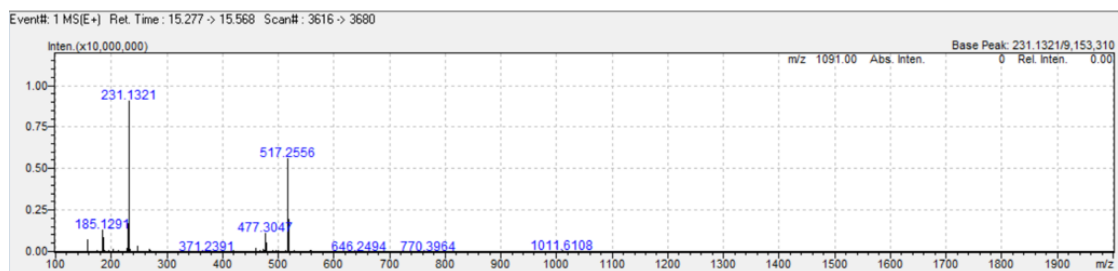

Figure S197 HRESIMS spectrum of artematrolide P (20).

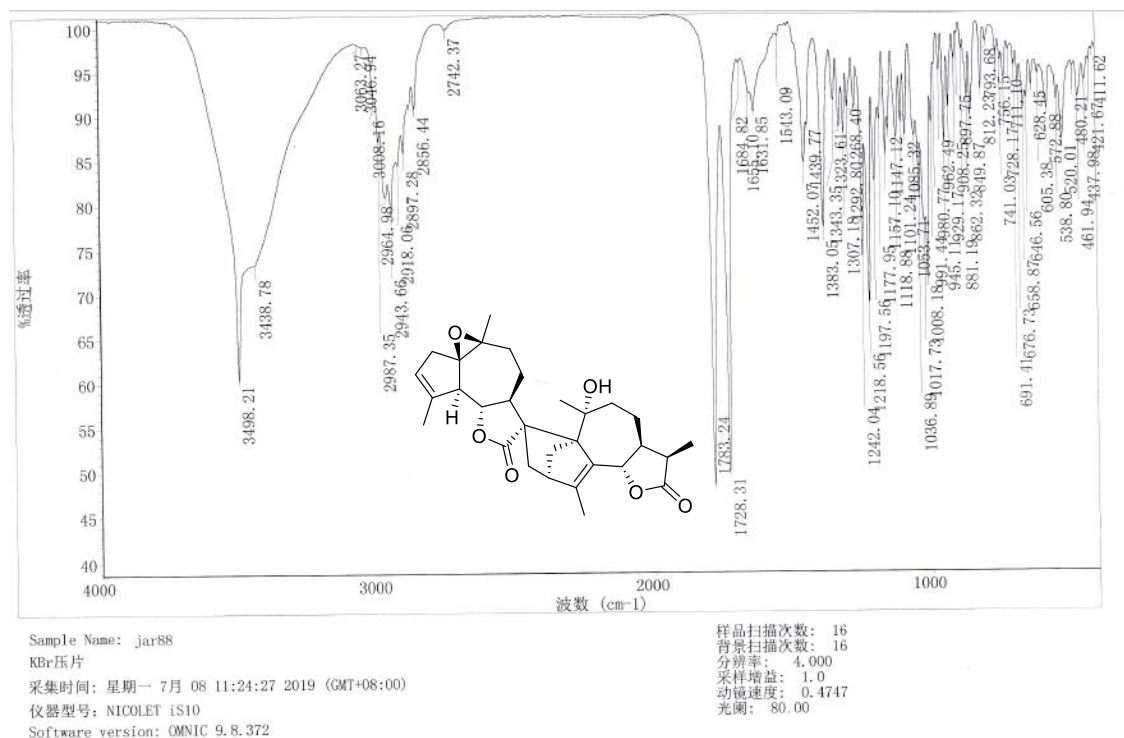

Figure S198 IR spectrum of artematrolide P (20).

**Rudolph Research Analytical**

This sample was measured on an Autopol VI, Serial #91058  
 Manufactured by Rudolph Research Analytical, Hackettstown, NJ, USA.  
 Measurement Date: Monday, 08-JUL-2019  
 Set Temperature: OFF  
 Time Delay: Disabled  
 Delay between Measurement: Disabled

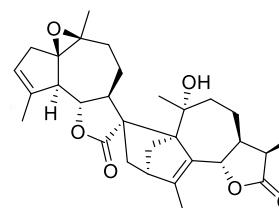

| n | Average | Std.Dev. | % RSD | Maximum | Minimum |
|---|---------|----------|-------|---------|---------|
| 5 | 88.67   | 1.13     | 1.27  | 90.00   | 87.33   |

  

| S.No | Sample ID | Time        | Result | Scale | OR °Arc | WLG.nm | L.g.mm | Conc.g/100ml | Temp. |
|------|-----------|-------------|--------|-------|---------|--------|--------|--------------|-------|
| 1    | jar88     | 05:31:15 PM | 89.33  | SR    | 0.0268  | 589    | 100.00 | 0.030        | 24.4  |
| 2    | jar88     | 05:31:24 PM | 90.00  | SR    | 0.0270  | 589    | 100.00 | 0.030        | 24.4  |
| 3    | jar88     | 05:31:32 PM | 89.00  | SR    | 0.0267  | 589    | 100.00 | 0.030        | 24.4  |
| 4    | jar88     | 05:31:40 PM | 87.67  | SR    | 0.0263  | 589    | 100.00 | 0.030        | 24.4  |
| 5    | jar88     | 05:31:48 PM | 87.33  | SR    | 0.0262  | 589    | 100.00 | 0.030        | 24.4  |

Figure S199 Optical rotation spectrum of artematrolide P (20).

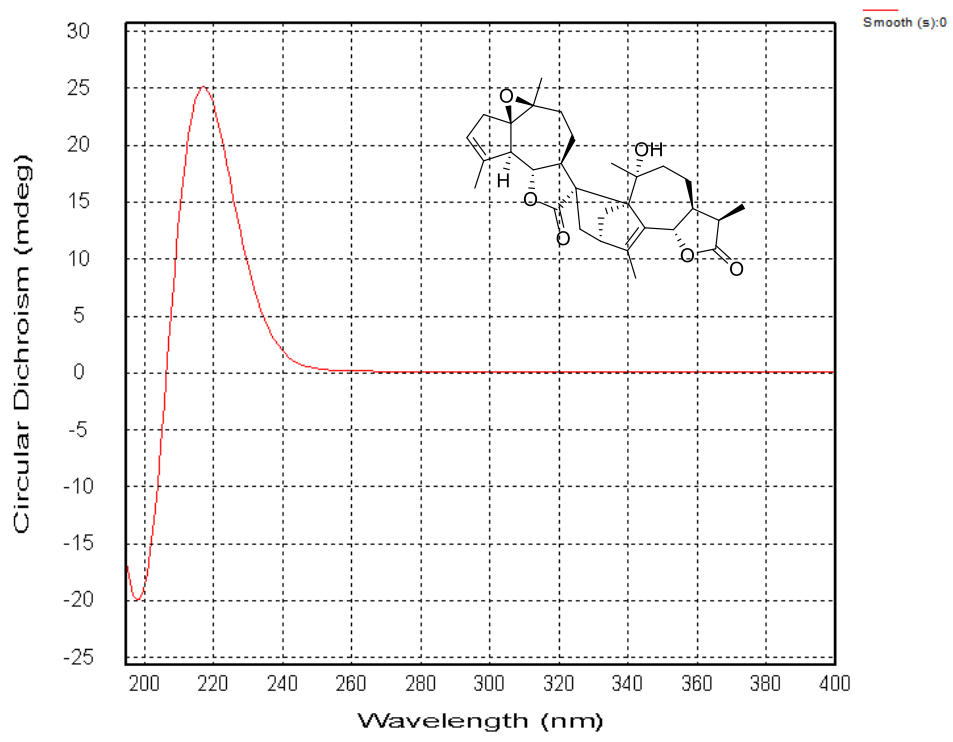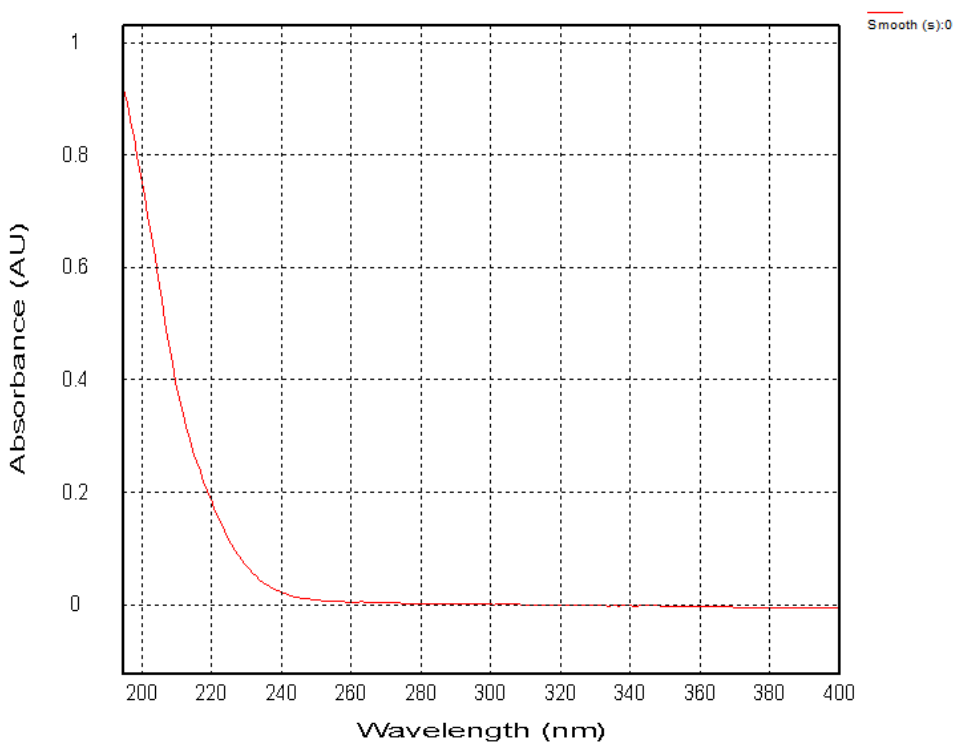

Figure S200 CD (top) and UV (bottom) spectra of artematrolide P (20).



## 22. NMR, MS, IR, $[\alpha]_D$ and CD spectra of compound 21

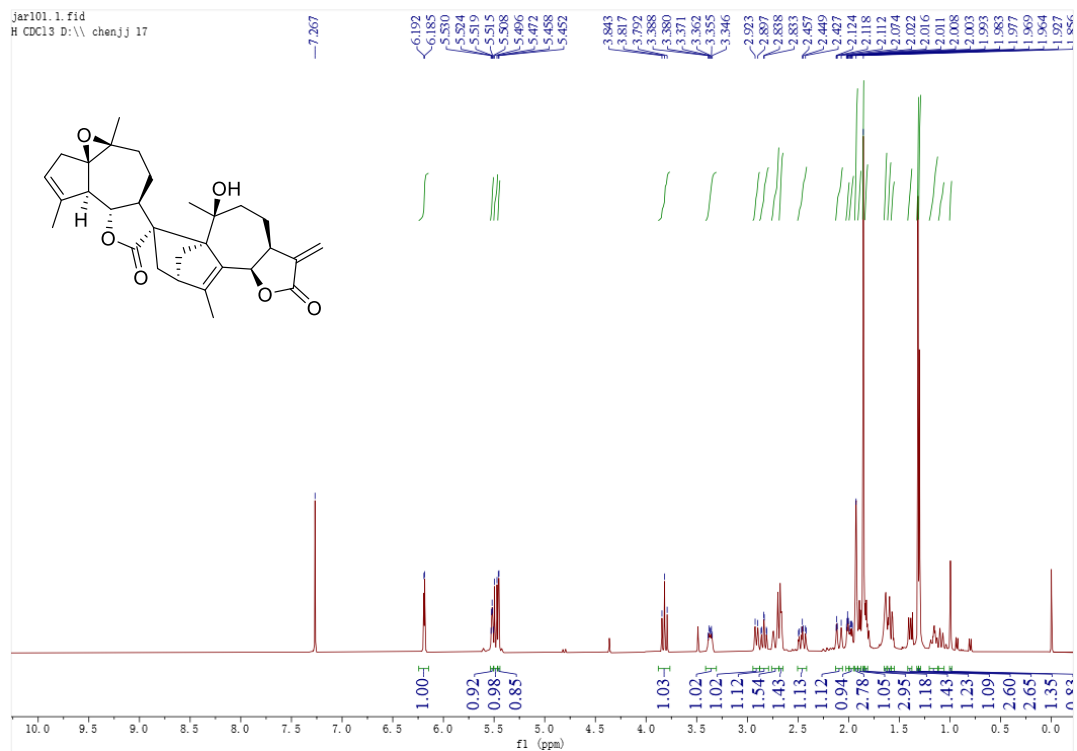

Figure S201  $^1\text{H}$  NMR spectrum (400 MHz) of artematrolide Q (21) in  $\text{CDCl}_3$ .

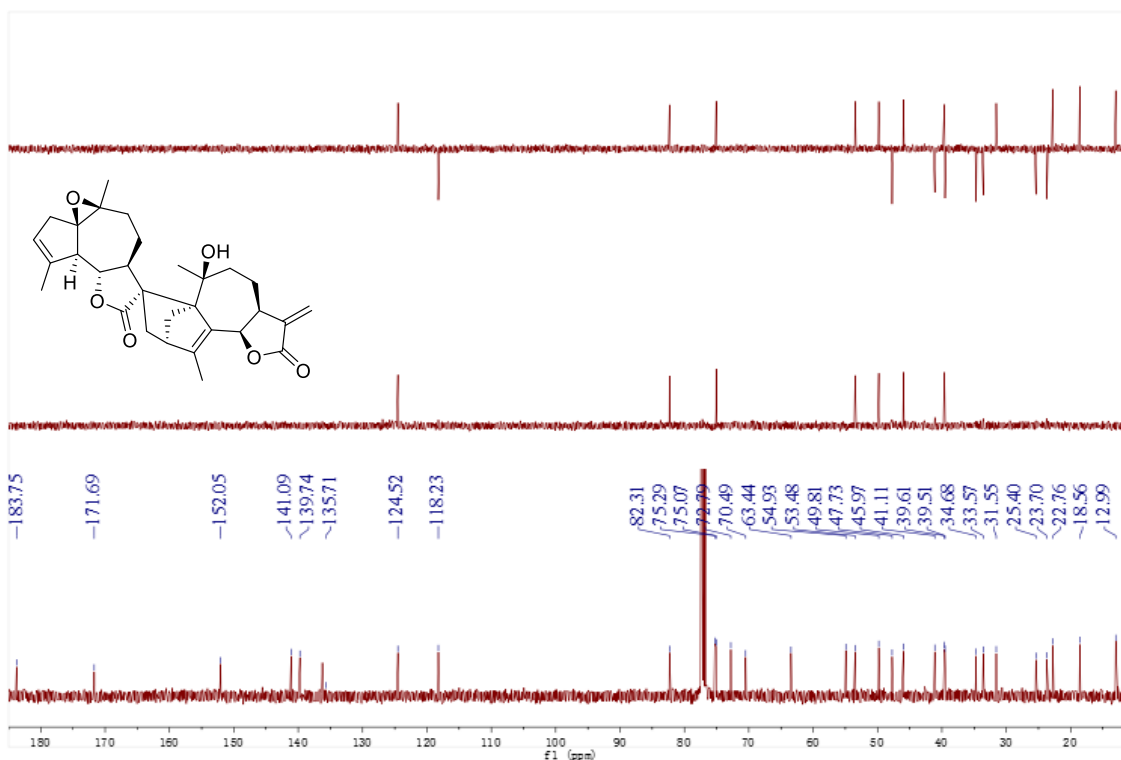

Figure S202  $^{13}\text{C}$  NMR spectrum (100 MHz) of artematrolide Q (21) in  $\text{CDCl}_3$ .

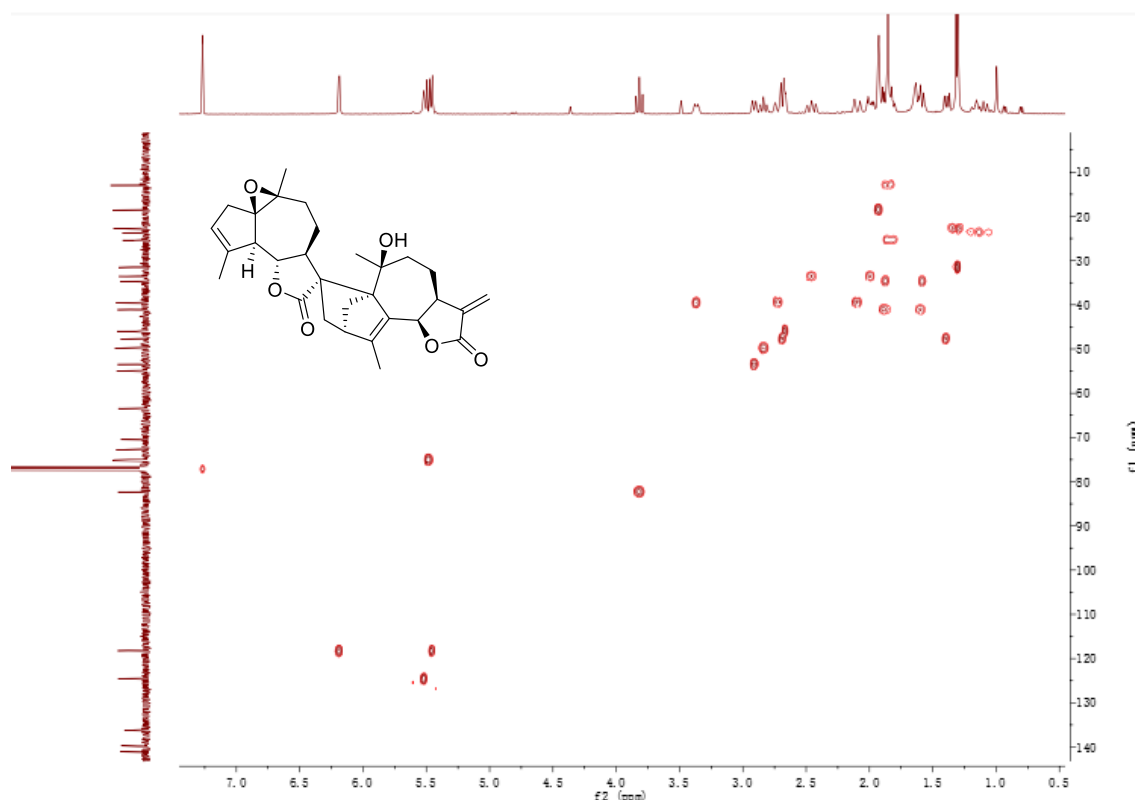

**Figure S203** HSQC spectrum (600 MHz) of artematrolide Q (**21**) in  $\text{CDCl}_3$ .

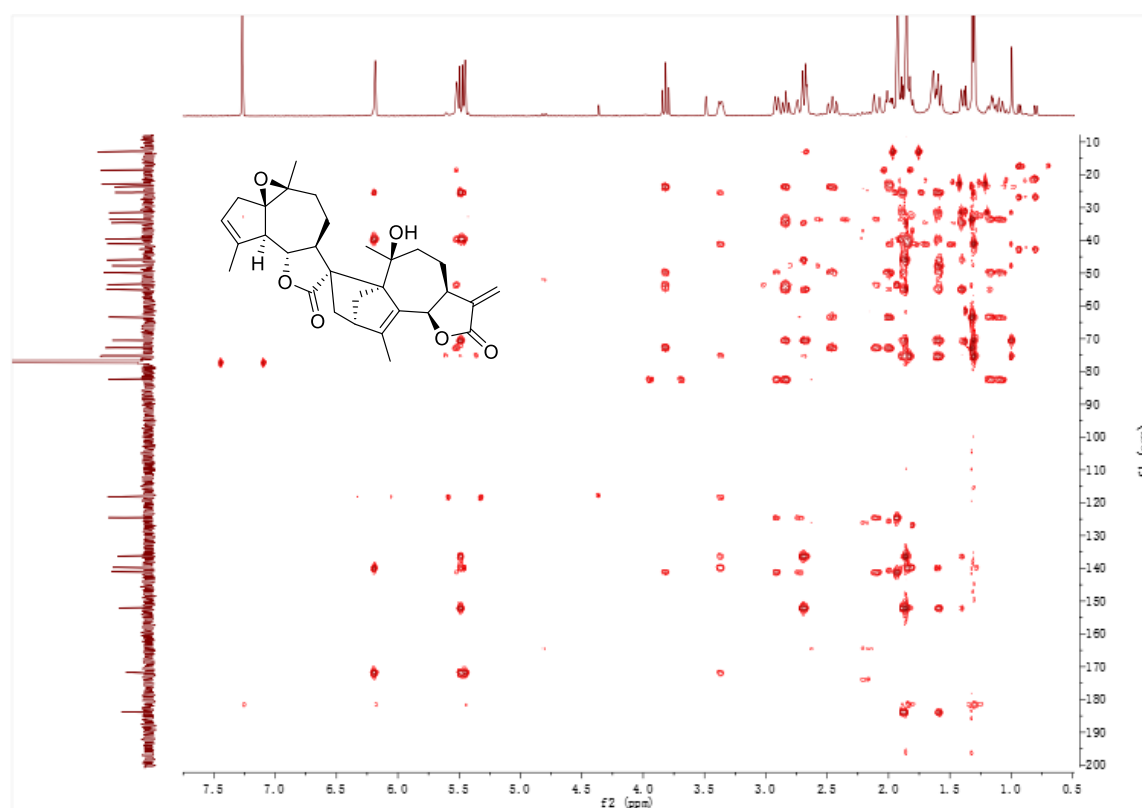

**Figure S204** HMBC spectrum (600 MHz) of artematrolide Q (**21**) in  $\text{CDCl}_3$ .

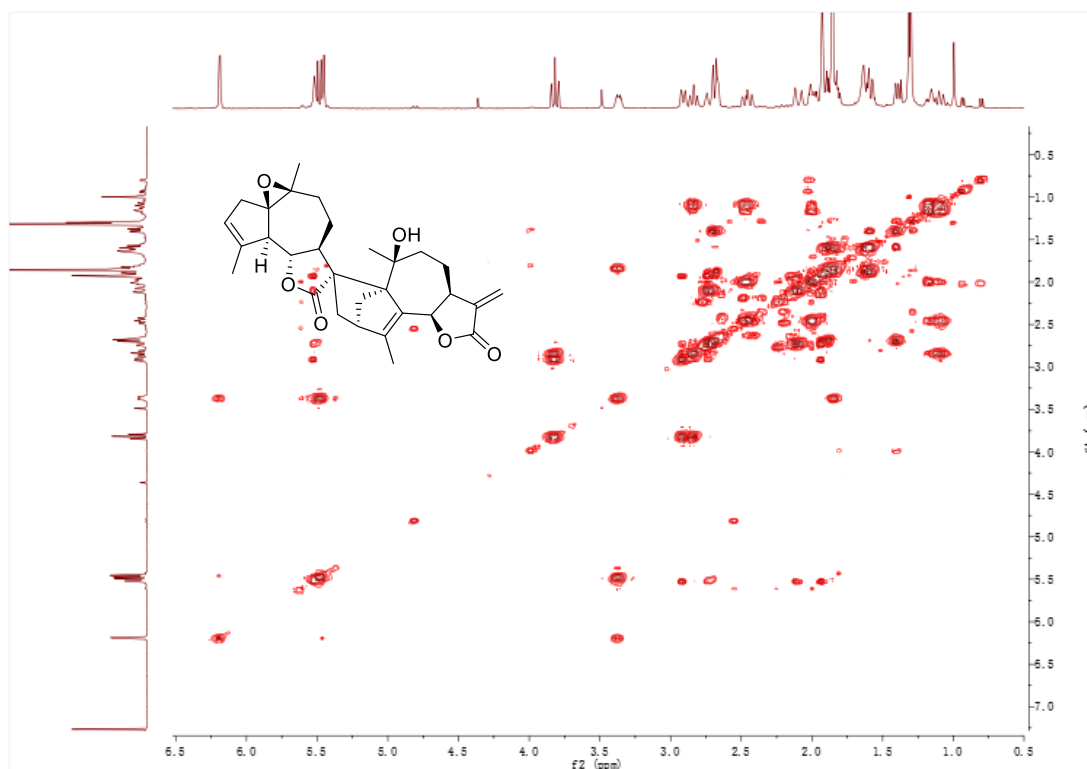

**Figure S205**  $^1\text{H}$ - $^1\text{H}$  COSY spectrum (600 MHz) of artematrolide Q (**21**) in  $\text{CDCl}_3$ .

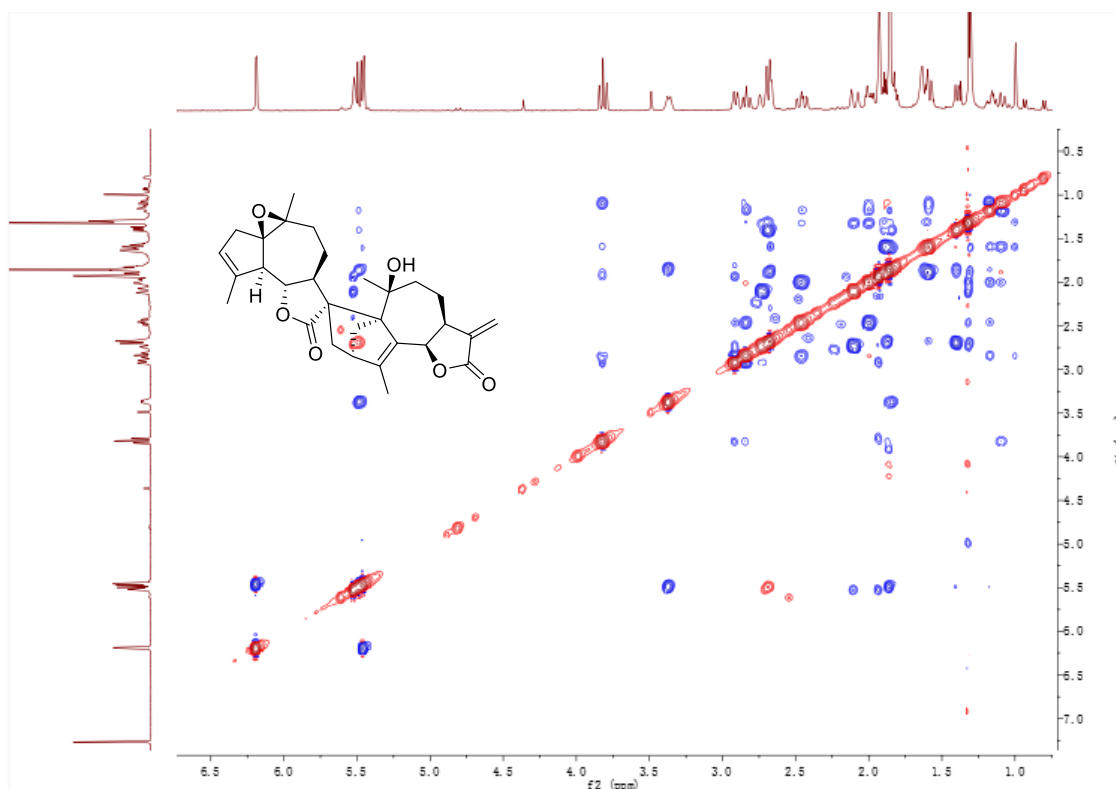

**Figure S206** ROESY spectrum (600 MHz) of artematrolide Q (**21**) in  $\text{CDCl}_3$ .

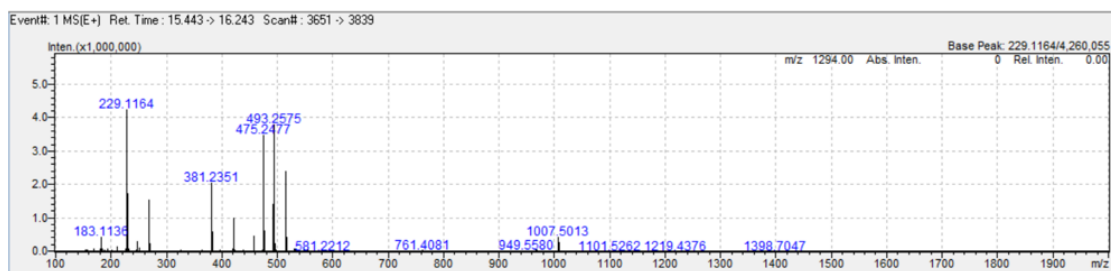

Figure S207 HRESIMS spectrum of artematrolide Q (21).

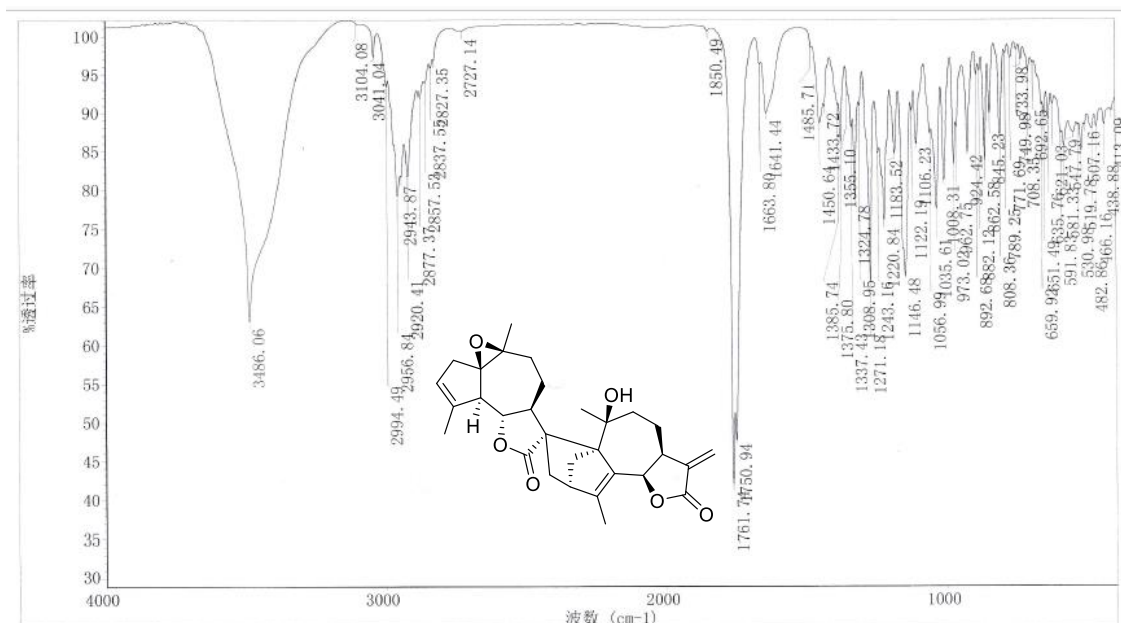

Sample Name: jar101

KBr压片

采集时间: 星期一 1月 13 15:35:32 2020 (GMT+08:00)

仪器型号: NICOLET iS10

Software version: OMNIC 9.8.372

样品扫描次数: 16  
背景扫描次数: 16  
分辨率: 4.000  
采样增益: 1.0  
扫描速度: 0.4747  
光阑: 80.00

Figure S208 IR spectrum of artematrolide Q (21).

**Rudolph Research Analytical**

This sample was measured on an Autopol VI, Serial #91058  
Manufactured by Rudolph Research Analytical, Hackettstown, NJ, USA.

Measurement Date : Saturday, 04-JAN-2020

Set Temperature : OFF

Time Delay : Disabled

Delay between Measurement : Disabled

| n | Average | Std.Dev. | % RSD | Maximum | Minimum |
|---|---------|----------|-------|---------|---------|
| 5 | -87.33  | 0.26     | -0.29 | -86.98  | -87.62  |

| S.No | Sample ID | Time        | Result | Scale | OR °Arc | WLG.nm | Lq.mm  | Conc.g/100ml | Temp. |
|------|-----------|-------------|--------|-------|---------|--------|--------|--------------|-------|
| 1    | jar101    | 01:45:13 PM | -87.14 | SR    | -0.0549 | 589    | 100.00 | 0.063        | 22.8  |
| 2    | jar101    | 01:45:22 PM | -87.46 | SR    | -0.0551 | 589    | 100.00 | 0.063        | 22.7  |
| 3    | jar101    | 01:45:30 PM | -87.62 | SR    | -0.0552 | 589    | 100.00 | 0.063        | 22.7  |
| 4    | jar101    | 01:45:38 PM | -86.98 | SR    | -0.0548 | 589    | 100.00 | 0.063        | 22.7  |
| 5    | jar101    | 01:45:46 PM | -87.46 | SR    | -0.0551 | 589    | 100.00 | 0.063        | 22.7  |

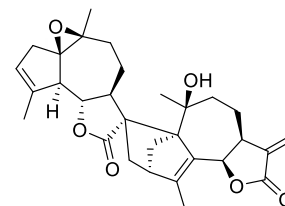

Figure S209 Optical rotation spectrum of artematrolide Q (21).

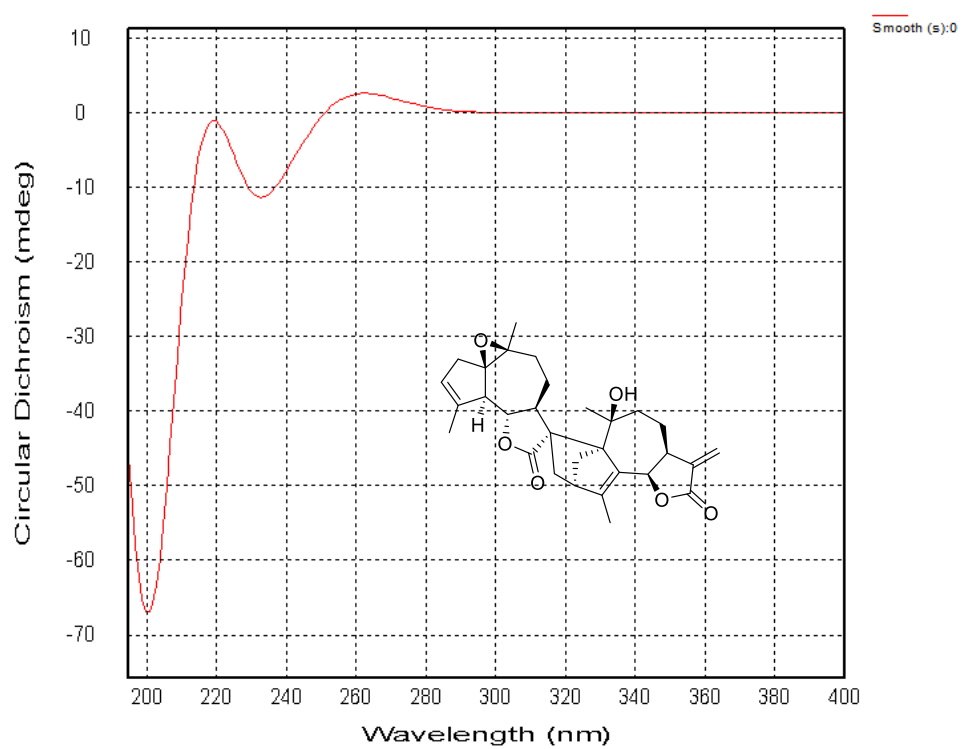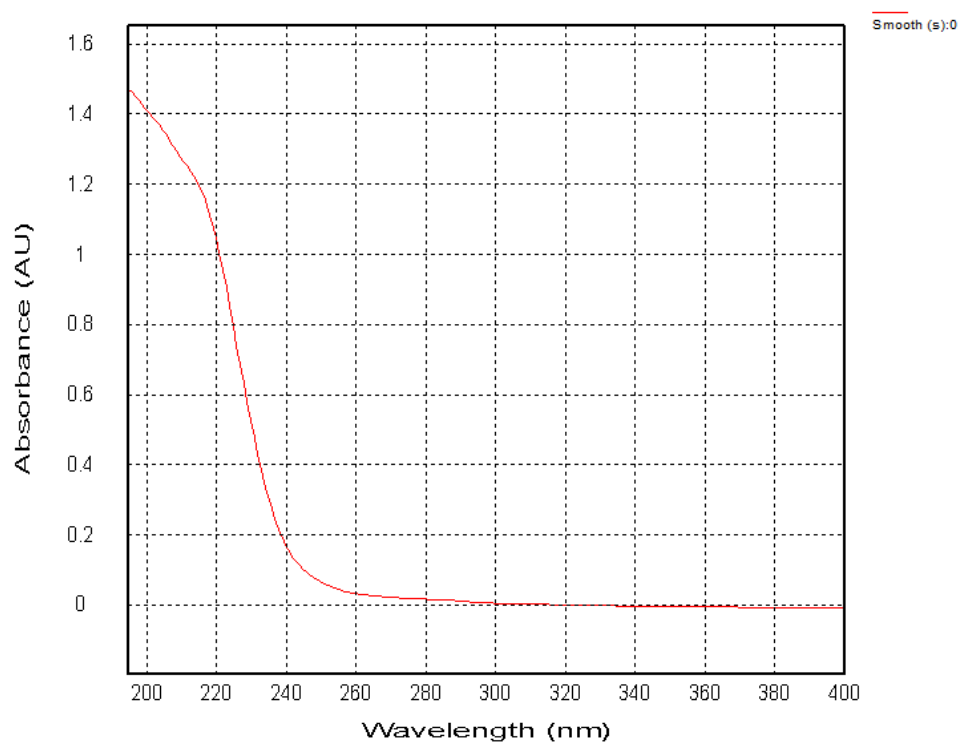

**Figure S210** CD (top) and UV (bottom) spectra of artematrolide Q (**21**).

## 23. NMR, MS, IR, $[\alpha]_D$ and CD spectra of compound 22

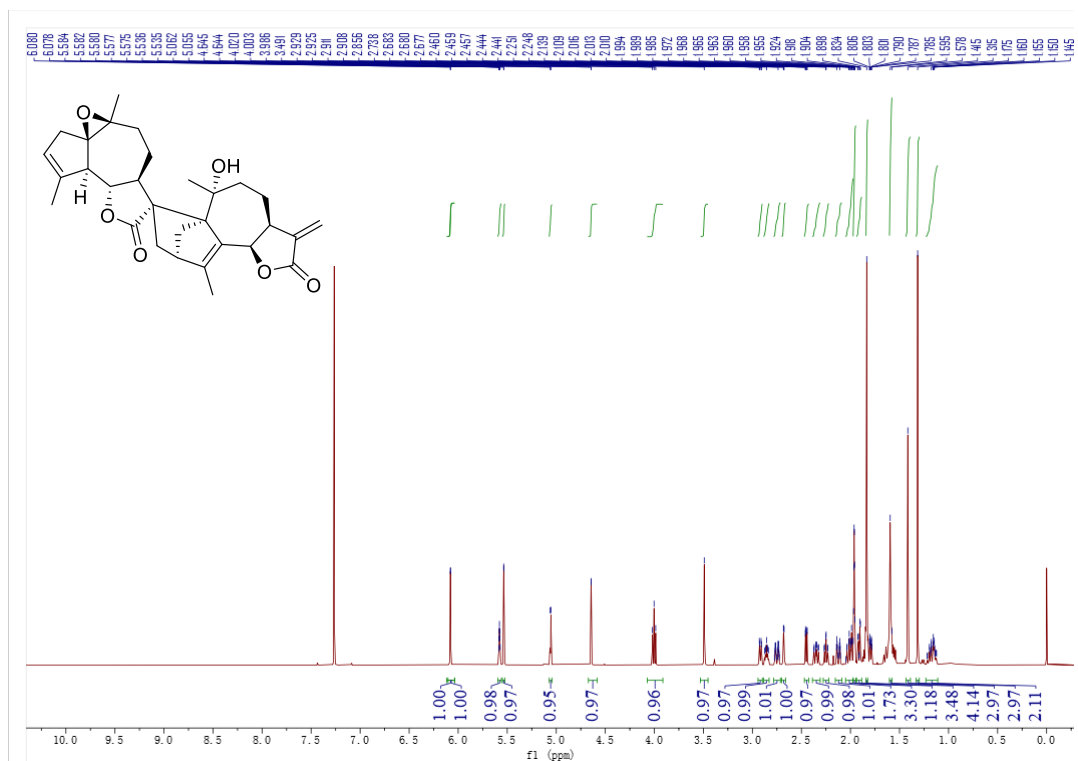

**Figure S211**  $^1\text{H}$  spectrum (600 MHz) of artematrolide R (**22**) in  $\text{CDCl}_3$ .

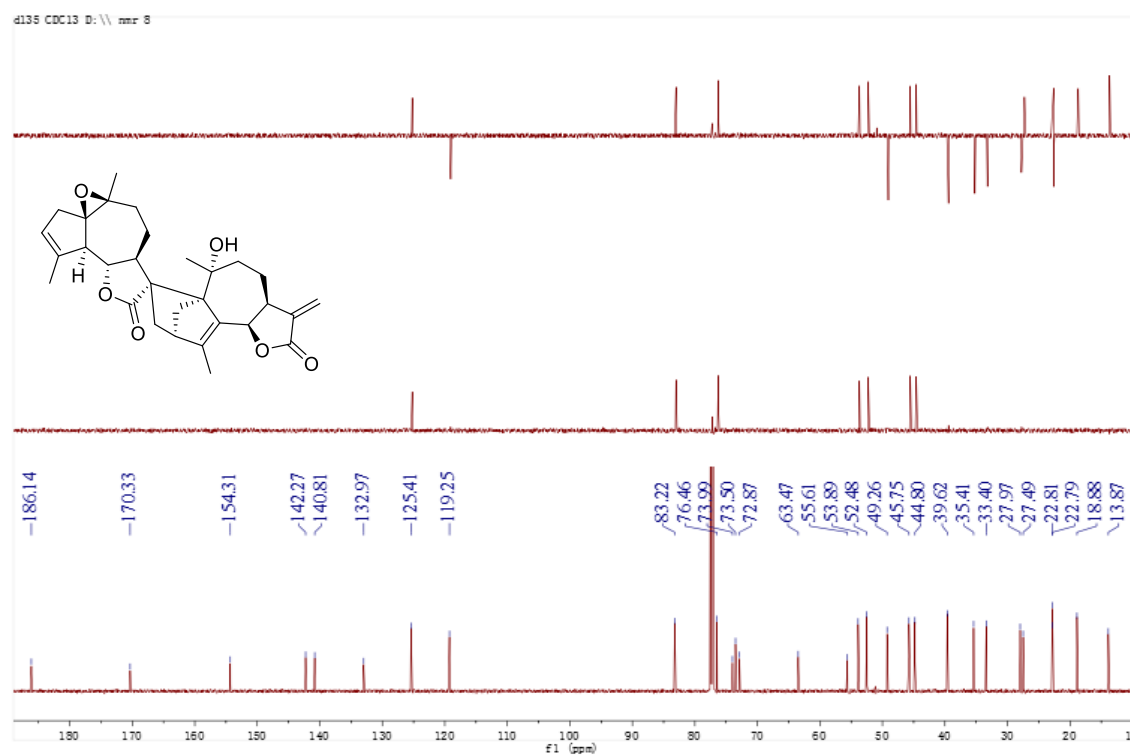

**Figure S212**  $^{13}\text{C}$  NMR spectrum (150 MHz) of artematrolide R (**22**) in  $\text{CDCl}_3$ .

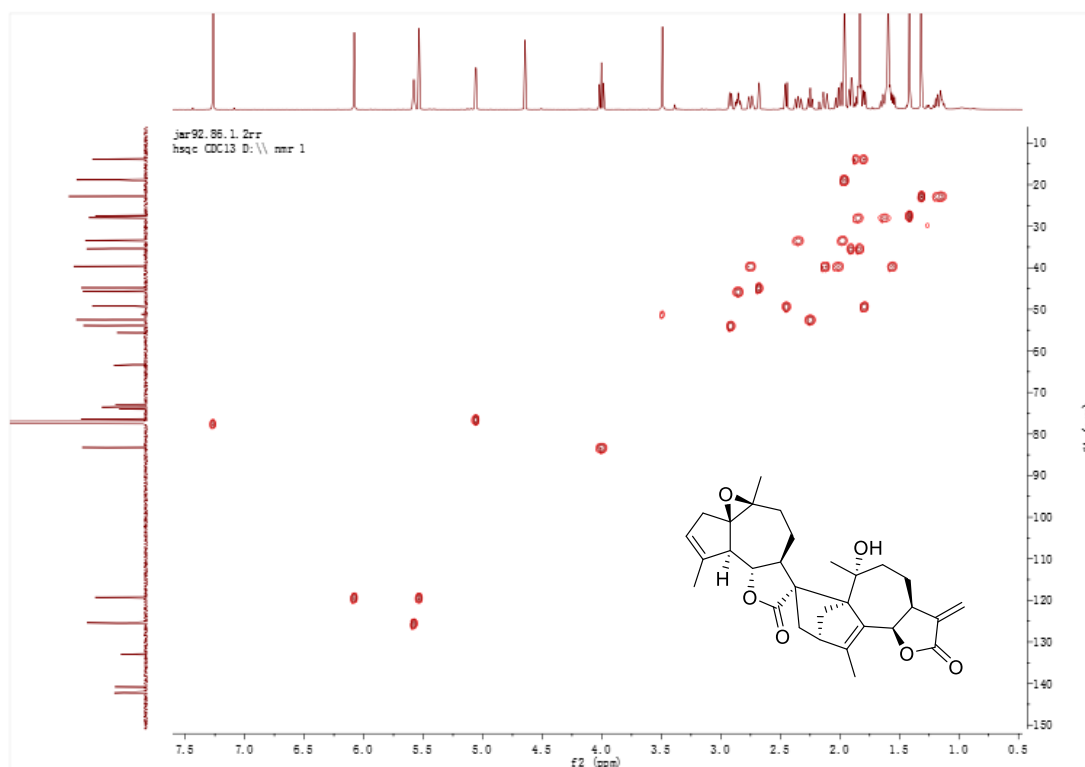

**Figure S213** HSQC spectrum (600 MHz) of artematrolide R (**22**) in CDCl<sub>3</sub>.

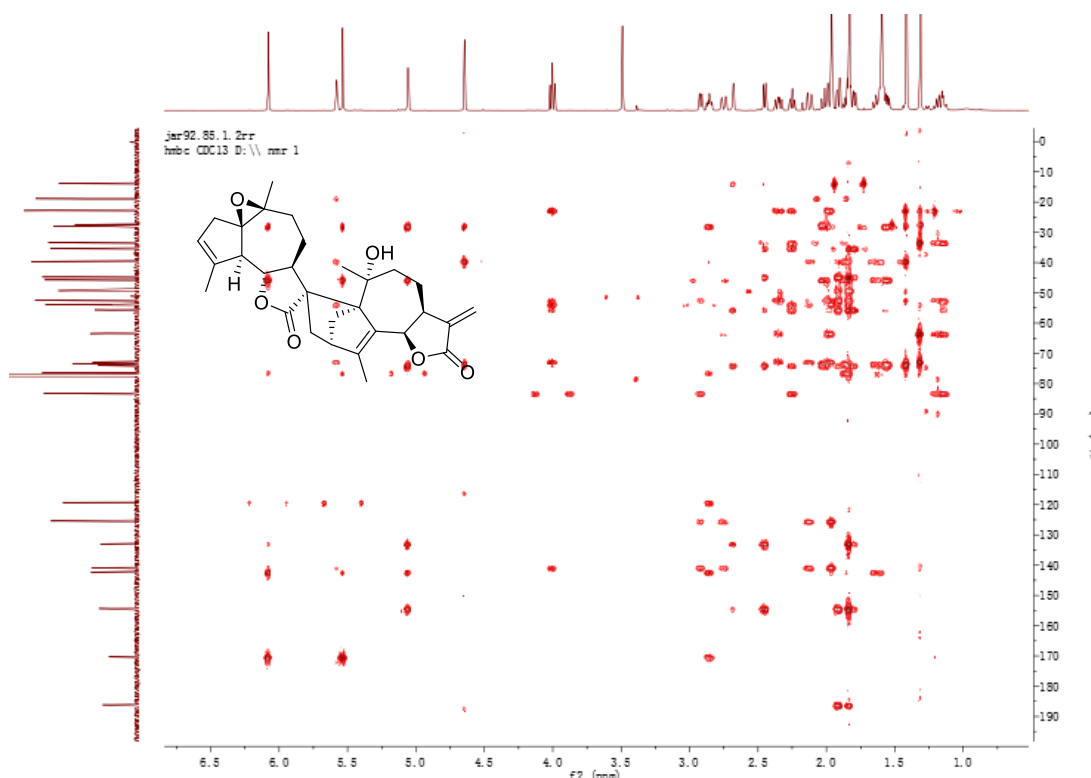

**Figure S214** HMBC spectrum (600 MHz) of artematrolide R (**22**) in CDCl<sub>3</sub>.

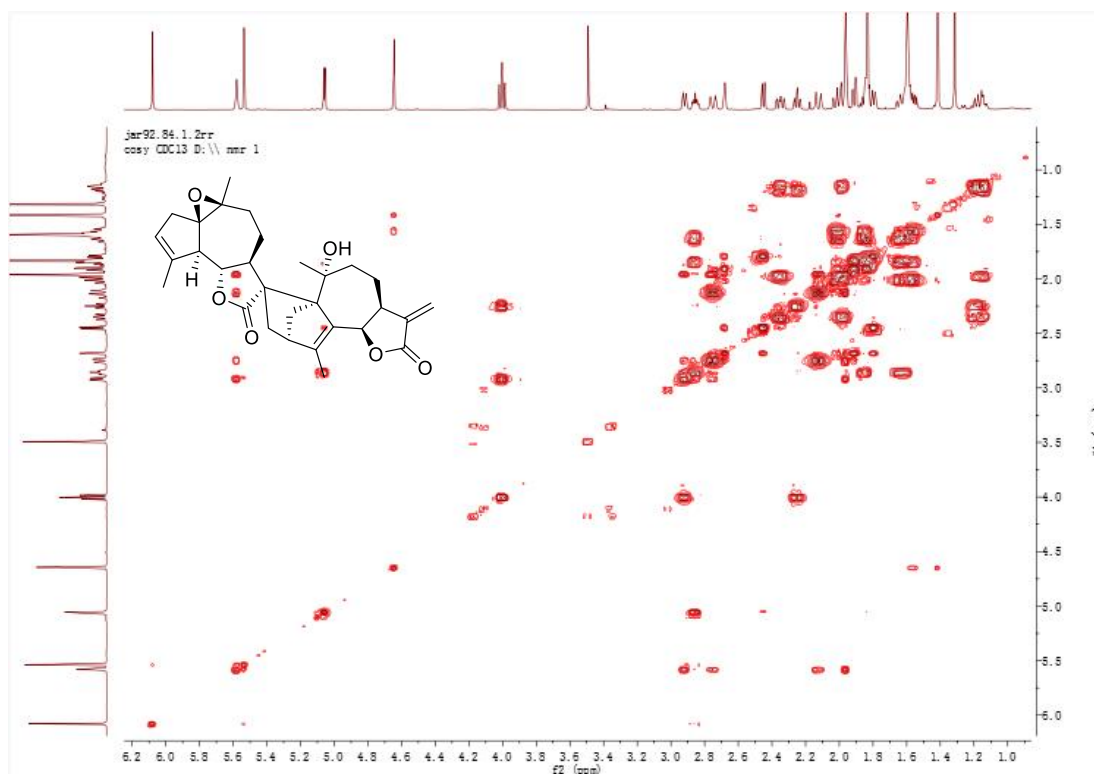

**Figure S215**  $^1\text{H}$ - $^1\text{H}$  COSY spectrum (600 MHz) of artematrolide R (**22**) in  $\text{CDCl}_3$ .

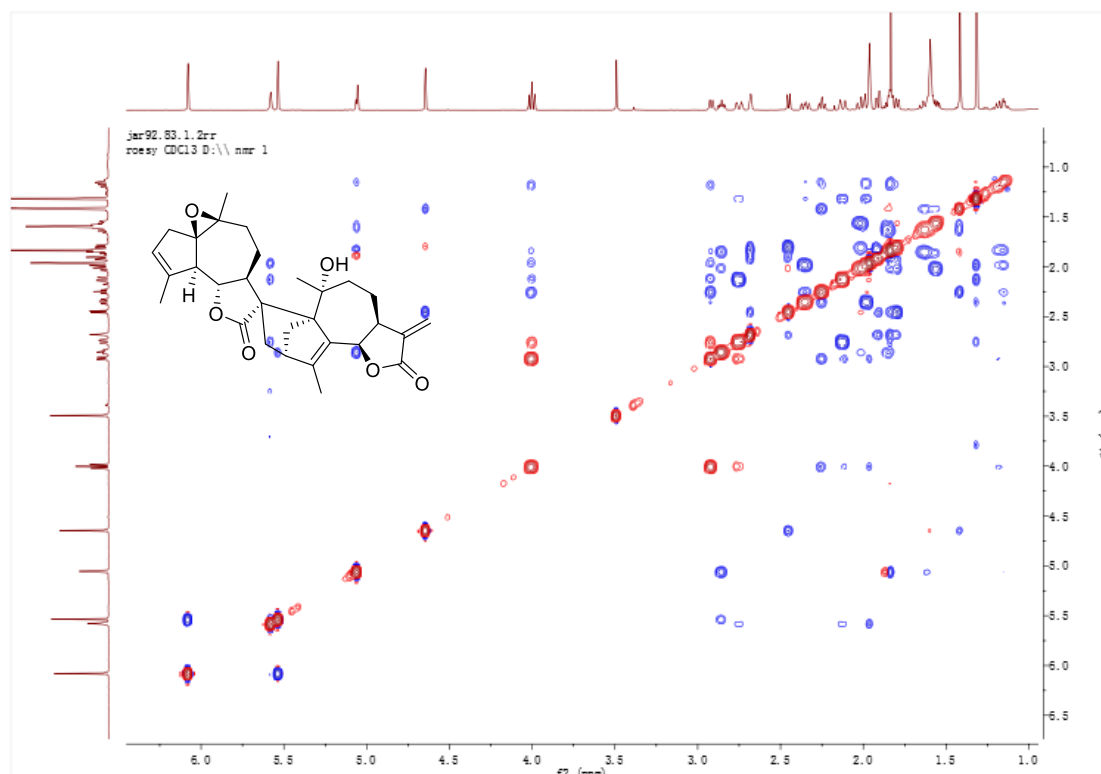

**Figure S216** ROESY spectrum (600 MHz) of artematrolide R (**22**) in  $\text{CDCl}_3$ .



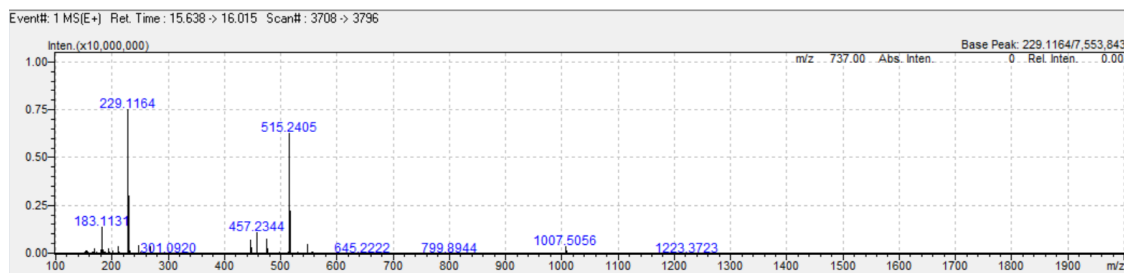

Figure S217 HRESIMS spectrum of artematrolide R (22).

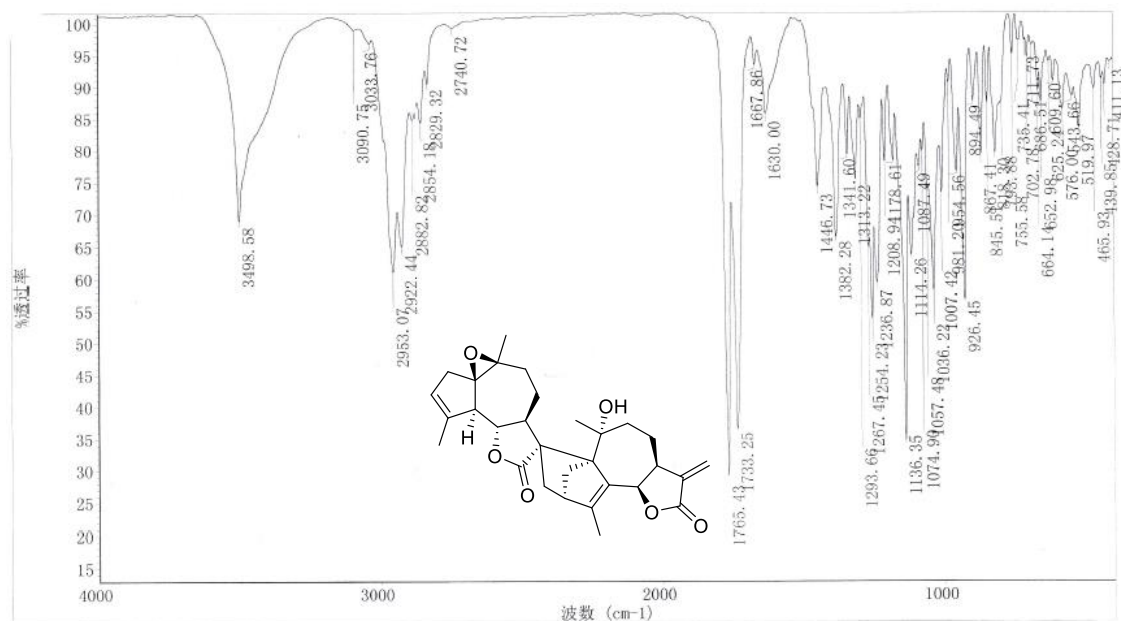

Figure S218 IR spectrum of artematrolide R (22).

**Rudolph Research Analytical**

This sample was measured on an Autopol VI, Serial #91058  
 Manufactured by Rudolph Research Analytical, Hackettstown, NJ, USA.

Measurement Date : Saturday, 04-JAN-2020

Set Temperature : OFF

Time Delay : Disabled

Delay between Measurement : Disabled

| n | Average | Std.Dev. | % RSD | Maximum | Minimum |
|---|---------|----------|-------|---------|---------|
| 5 | 17.90   | 0.23     | 1.28  | 18.31   | 17.80   |

| S.No | Sample ID | Time        | Result | Scale | OR °Arc | WLG.nm | Lq.mm  | Conc.g/100ml | Temp. |
|------|-----------|-------------|--------|-------|---------|--------|--------|--------------|-------|
| 1    | jar92     | 01:07:47 PM | 17.80  | SR    | 0.0105  | 589    | 100.00 | 0.059        | 22.2  |
| 2    | jar92     | 01:07:56 PM | 18.31  | SR    | 0.0108  | 589    | 100.00 | 0.059        | 22.2  |
| 3    | jar92     | 01:08:03 PM | 17.80  | SR    | 0.0105  | 589    | 100.00 | 0.059        | 22.2  |
| 4    | jar92     | 01:08:12 PM | 17.80  | SR    | 0.0105  | 589    | 100.00 | 0.059        | 22.2  |
| 5    | jar92     | 01:08:19 PM | 17.80  | SR    | 0.0105  | 589    | 100.00 | 0.059        | 22.2  |

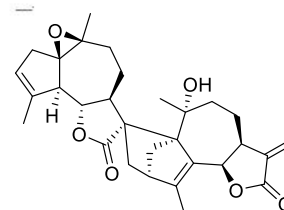

Figure S219 Optical rotation spectrum of artematrolide R (22).

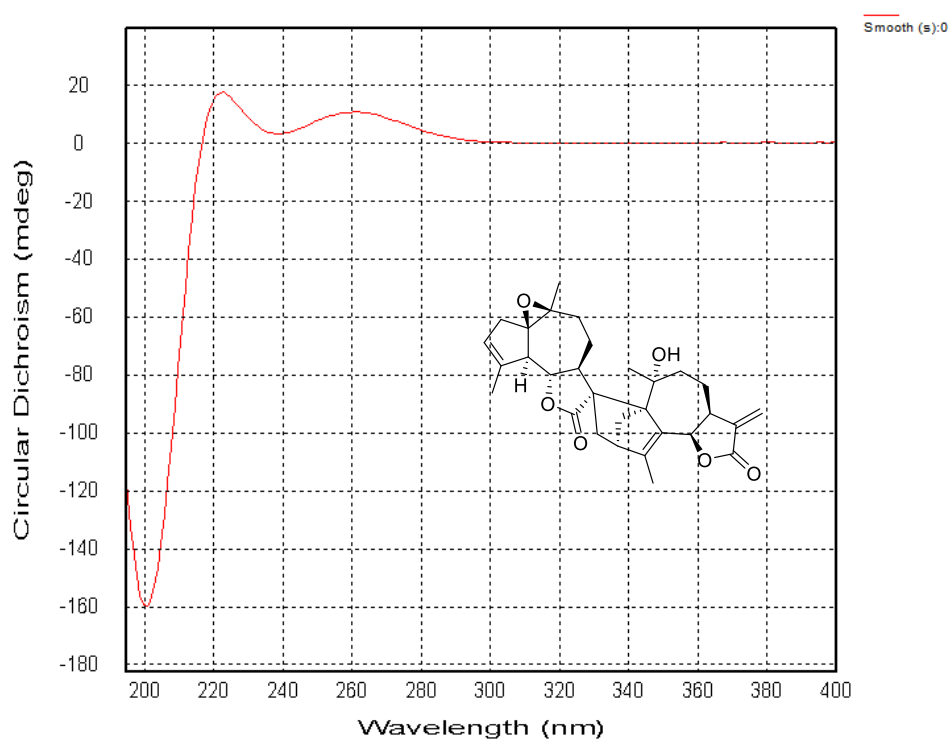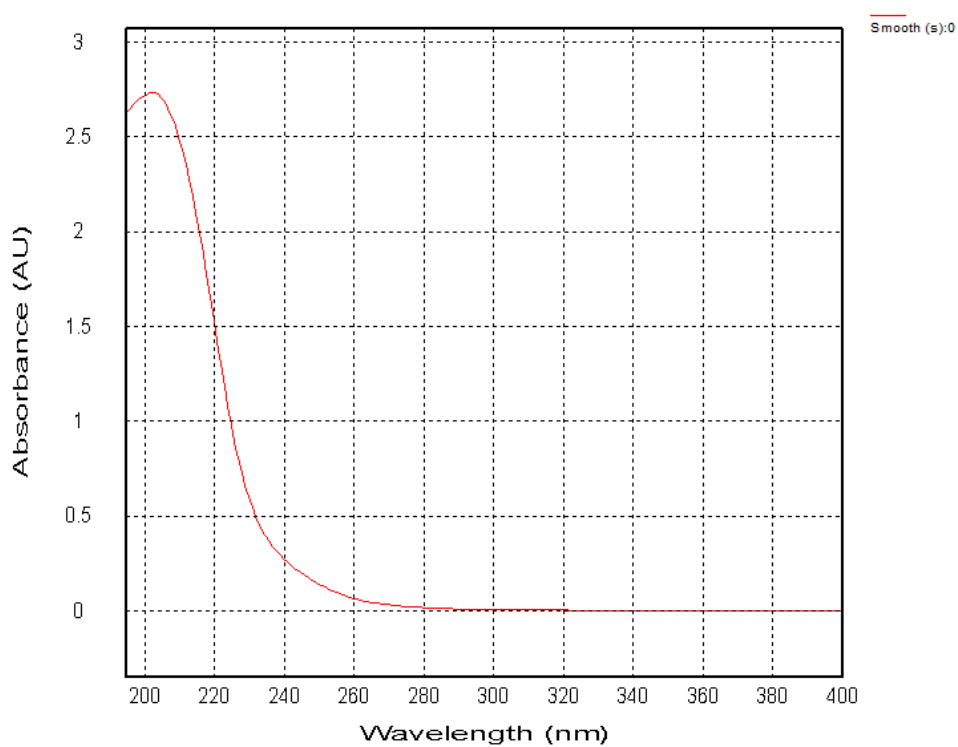

**Figure S220** CD (top) and UV (bottom) spectra of artematrolide R (**22**).

## 24. NMR, MS, IR, $[\alpha]_D$ and CD spectra of compound 23

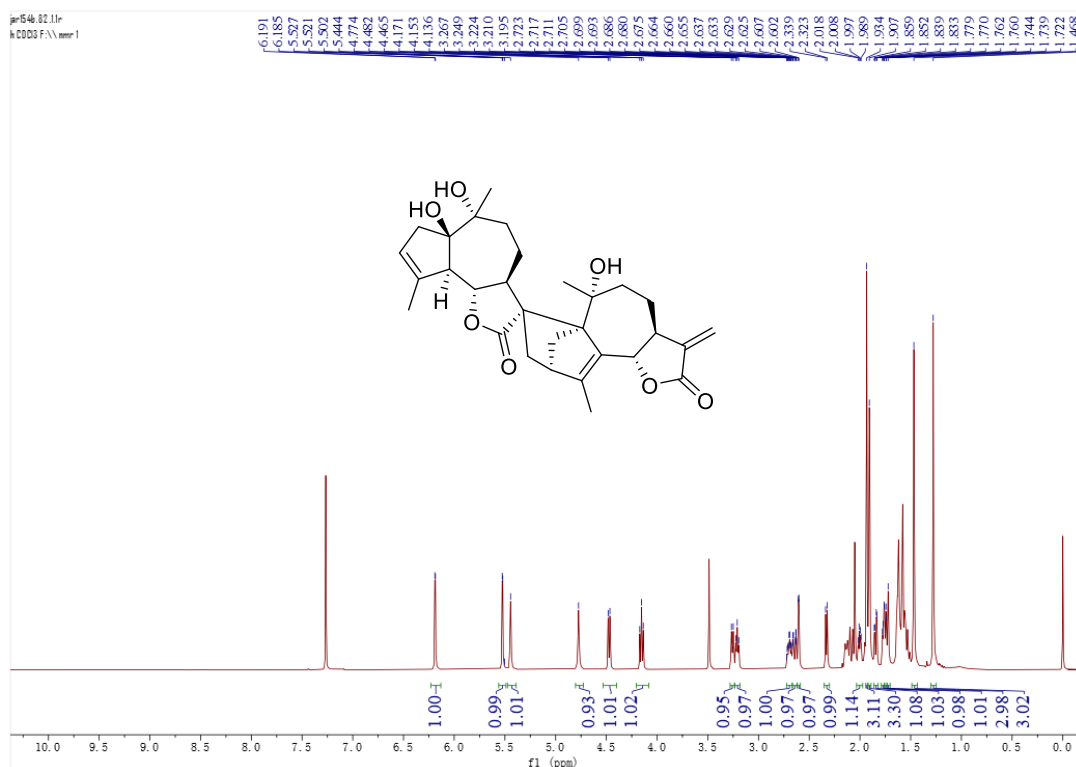

Figure S221 <sup>1</sup>H NMR spectrum (600 MHz) of lavandiolid C (**23**) in CDCl<sub>3</sub>.

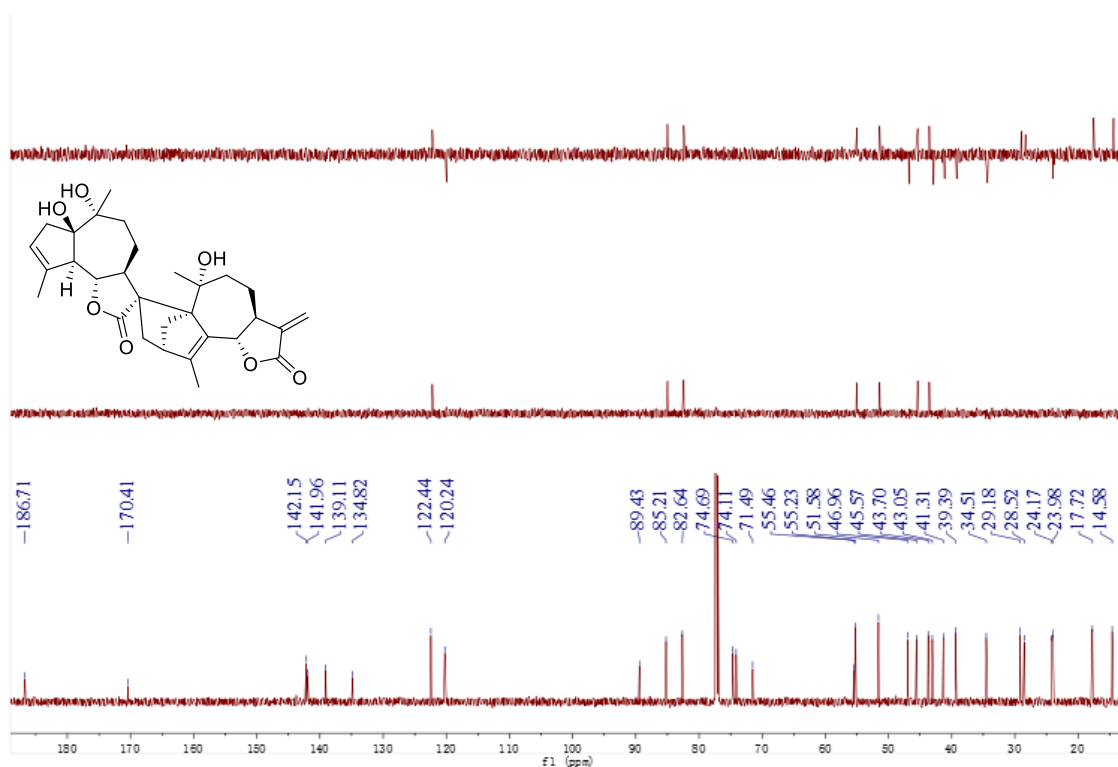

Figure S222 <sup>13</sup>C NMR spectrum (150 MHz) of lavandiolid C (**23**) in CDCl<sub>3</sub>.

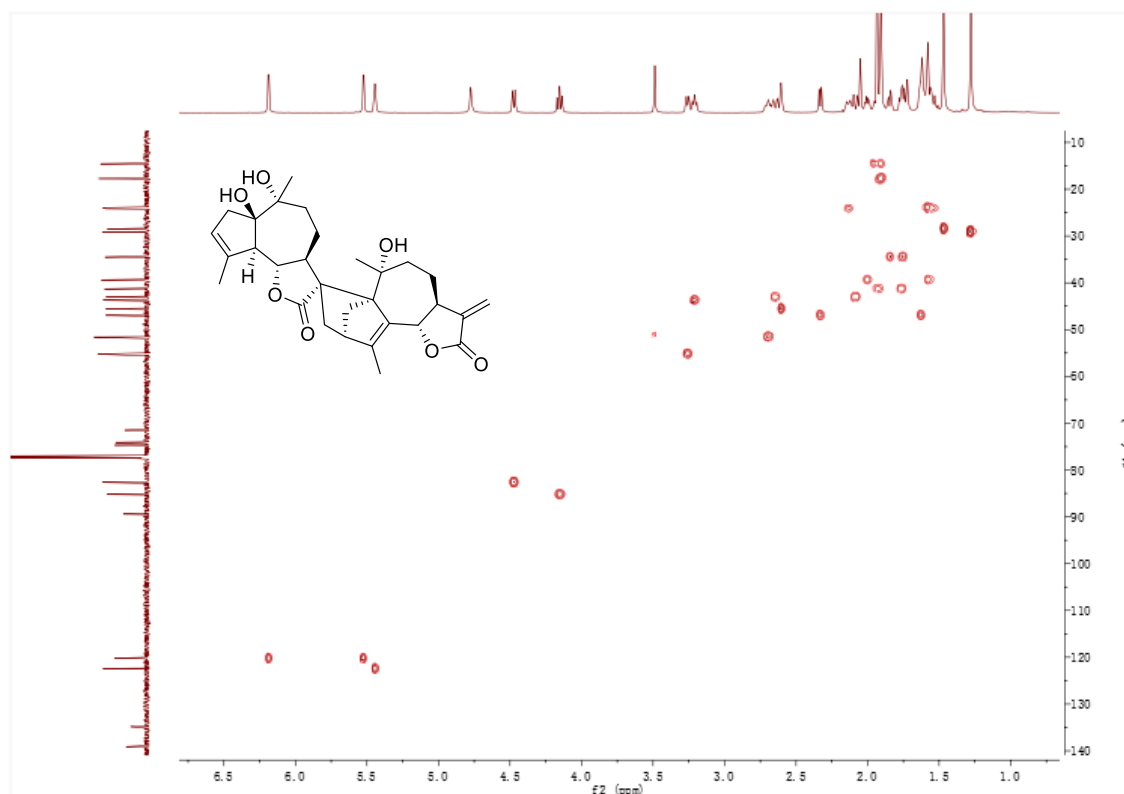

Figure S223 HSQC spectrum (600 MHz) of lavandiolid C (**23**) in  $\text{CDCl}_3$ .

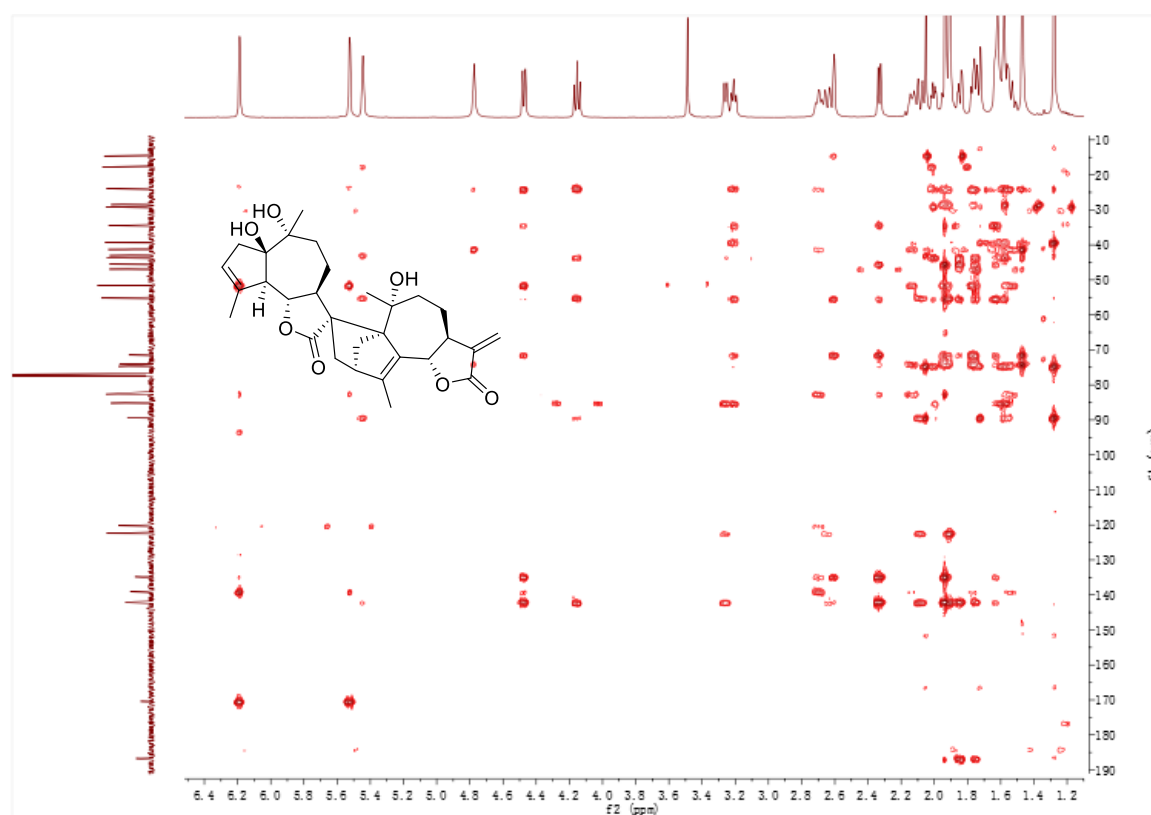

Figure S224 HMBC spectrum (600 MHz) of lavandiolid C (**23**) in  $\text{CDCl}_3$ .

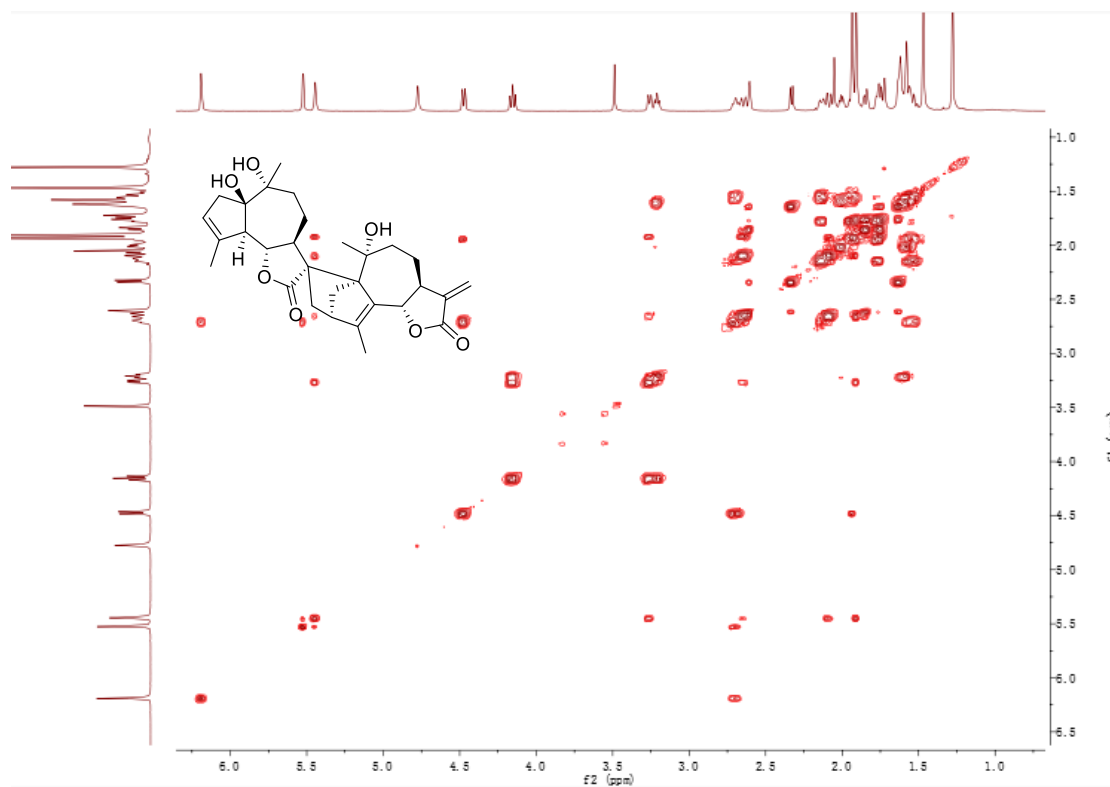

**Figure S225**  $^1\text{H}$ - $^1\text{H}$  COSY spectrum (600 MHz) of lavandiolid C (**23**) in  $\text{CDCl}_3$ .

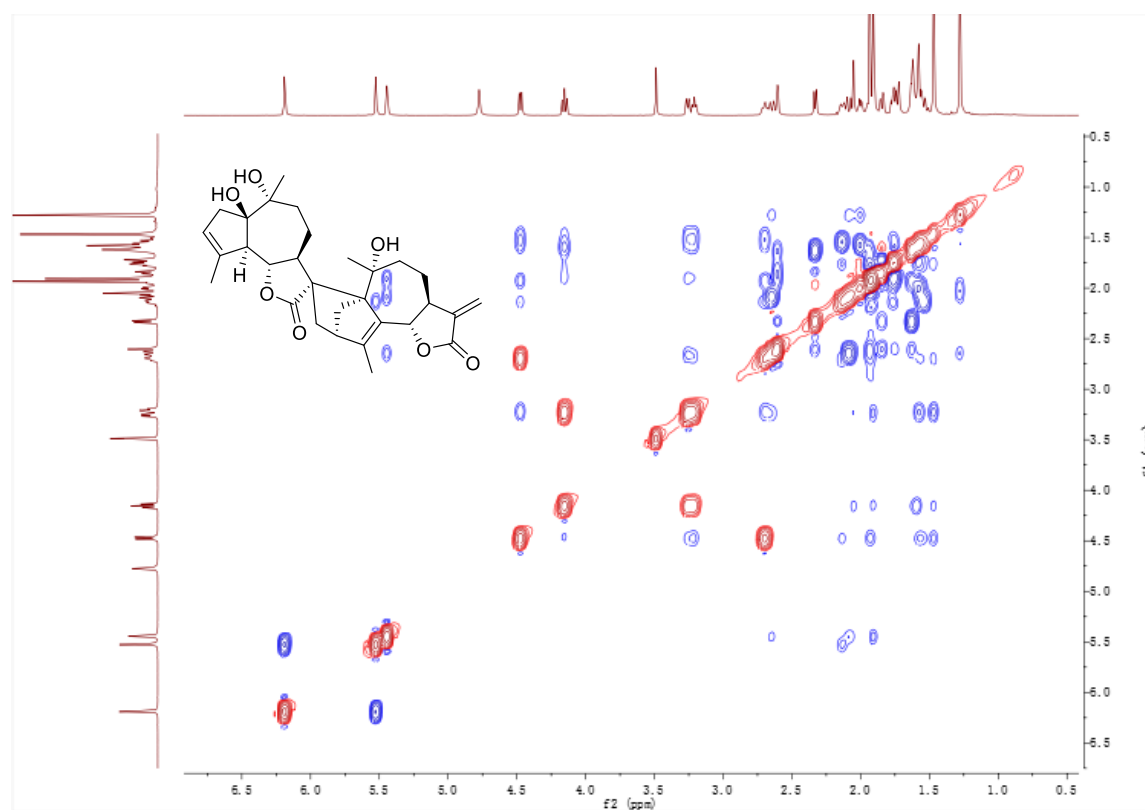

**Figure S226** ROESY spectrum (600 MHz) of lavandiolid C (**23**) in  $\text{CDCl}_3$ .

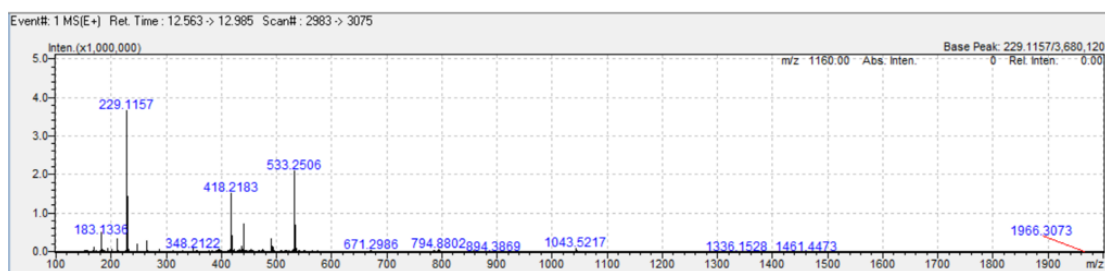

Figure S227 HRESIMS spectrum of lavandiolid C (23).

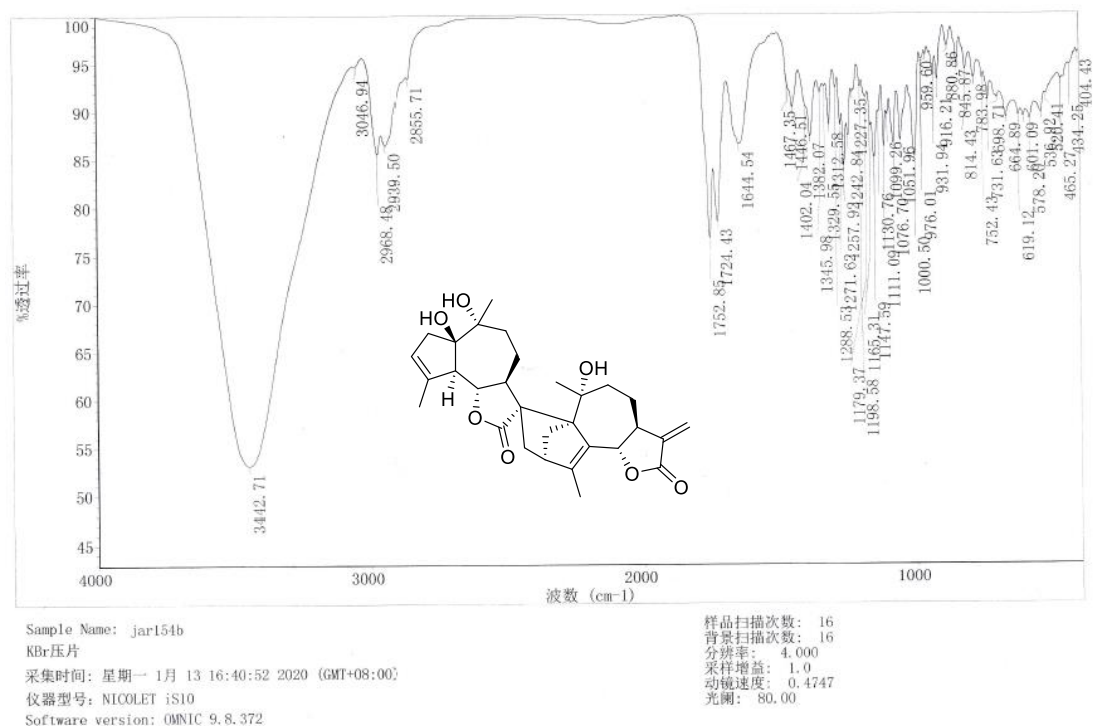

Figure S228 IR spectrum of lavandiolid C (23).

**Rudolph Research Analytical**

This sample was measured on an Autopol VI, Serial #91058  
 Manufactured by Rudolph Research Analytical, Hackettstown, NJ, USA.

Measurement Date : Monday, 13-JAN-2020

Set Temperature : OFF

Time Delay : Disabled

Delay between Measurement : Disabled

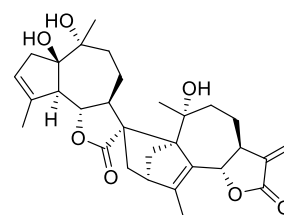

| n | Average | Std.Dev. | % RSD | Maximum | Minimum |
|---|---------|----------|-------|---------|---------|
| 5 | 102.27  | 0.15     | 0.14  | 102.43  | 102.16  |

  

| S.No | Sample ID | Time        | Result | Scale | OR °Arc | WLG.nm | Lg.mm  | Conc.g/100ml | Temp. |
|------|-----------|-------------|--------|-------|---------|--------|--------|--------------|-------|
| 1    | JAR154B   | 02:53:44 PM | 102.16 | SR    | 0.0378  | 589    | 100.00 | 0.037        | 21.2  |
| 2    | JAR154B   | 02:53:52 PM | 102.16 | SR    | 0.0378  | 589    | 100.00 | 0.037        | 21.2  |
| 3    | JAR154B   | 02:54:00 PM | 102.16 | SR    | 0.0378  | 589    | 100.00 | 0.037        | 21.2  |
| 4    | JAR154B   | 02:54:09 PM | 102.43 | SR    | 0.0379  | 589    | 100.00 | 0.037        | 21.2  |
| 5    | JAR154B   | 02:54:16 PM | 102.43 | SR    | 0.0379  | 589    | 100.00 | 0.037        | 21.2  |

Figure S229 Optical rotation spectrum of lavandiolid C (23).

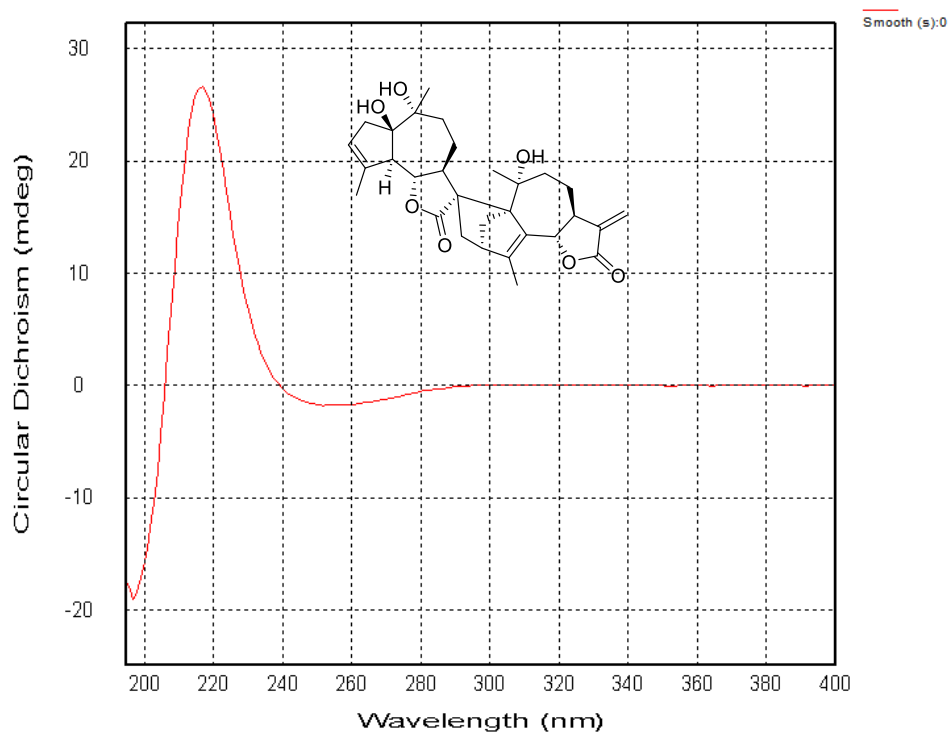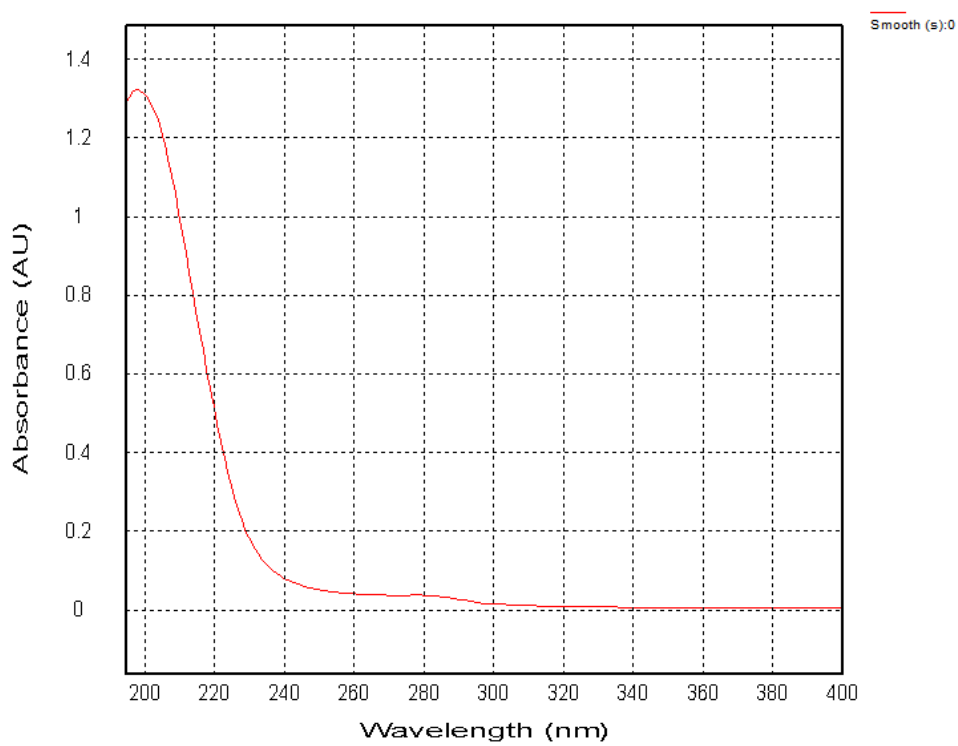

**Figure S230** CD (top) and UV (bottom) spectra of lavandiolide C (**23**).

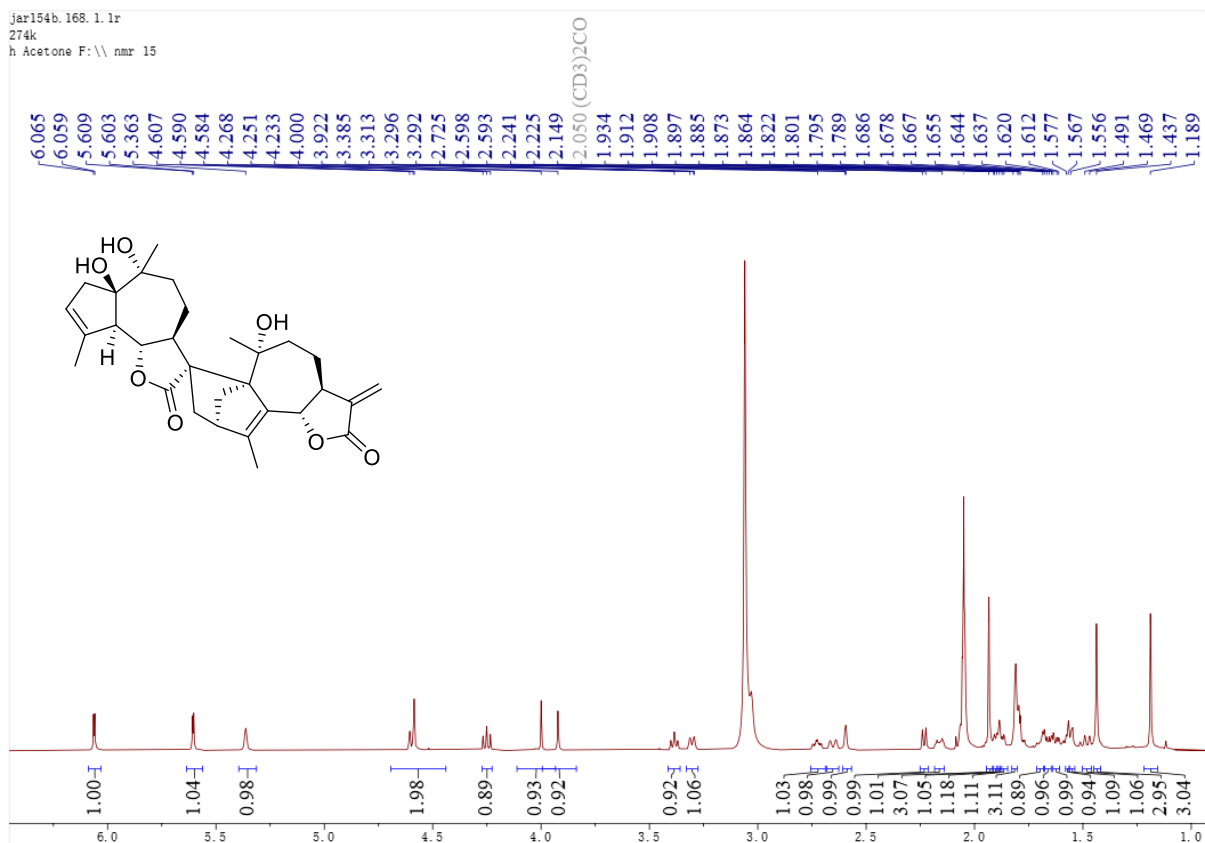

**Figure S231**  $^1\text{H}$  NMR spectrum (600 MHz) of lavandiolid C (**23**) in acetone- $d_6$ .

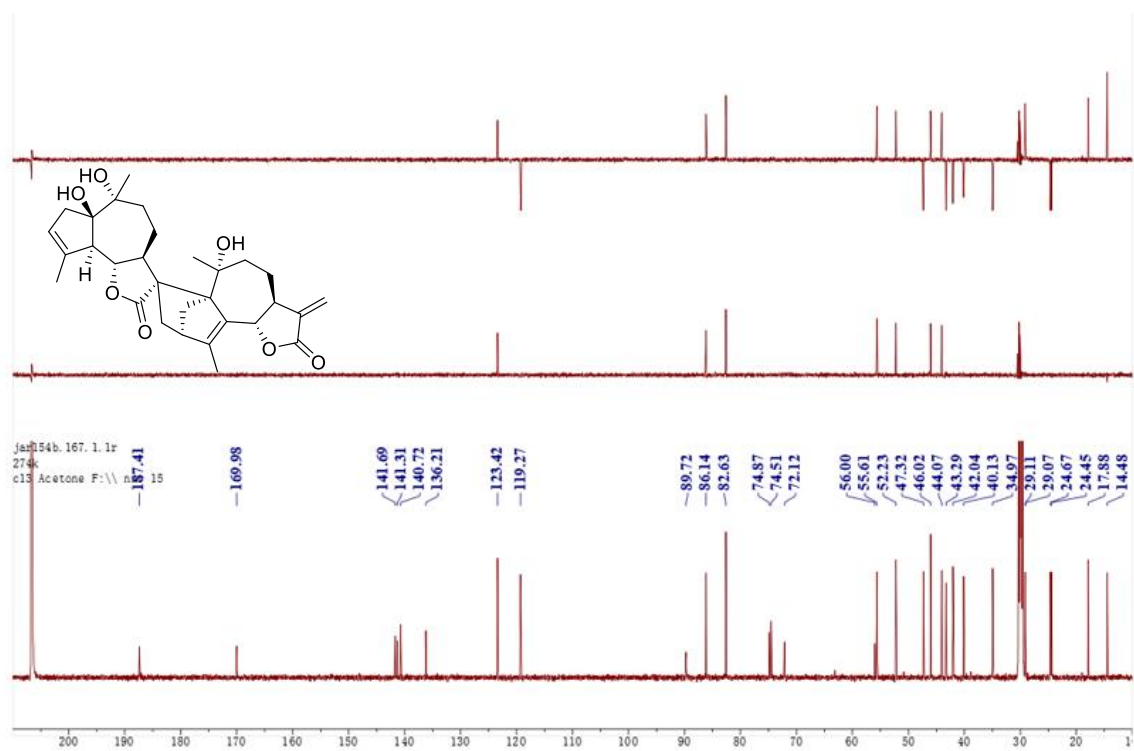

**Figure S232**  $^{13}\text{C}$  NMR spectrum (150 MHz) of lavandiolid C (**23**) in acetone- $d_6$ .



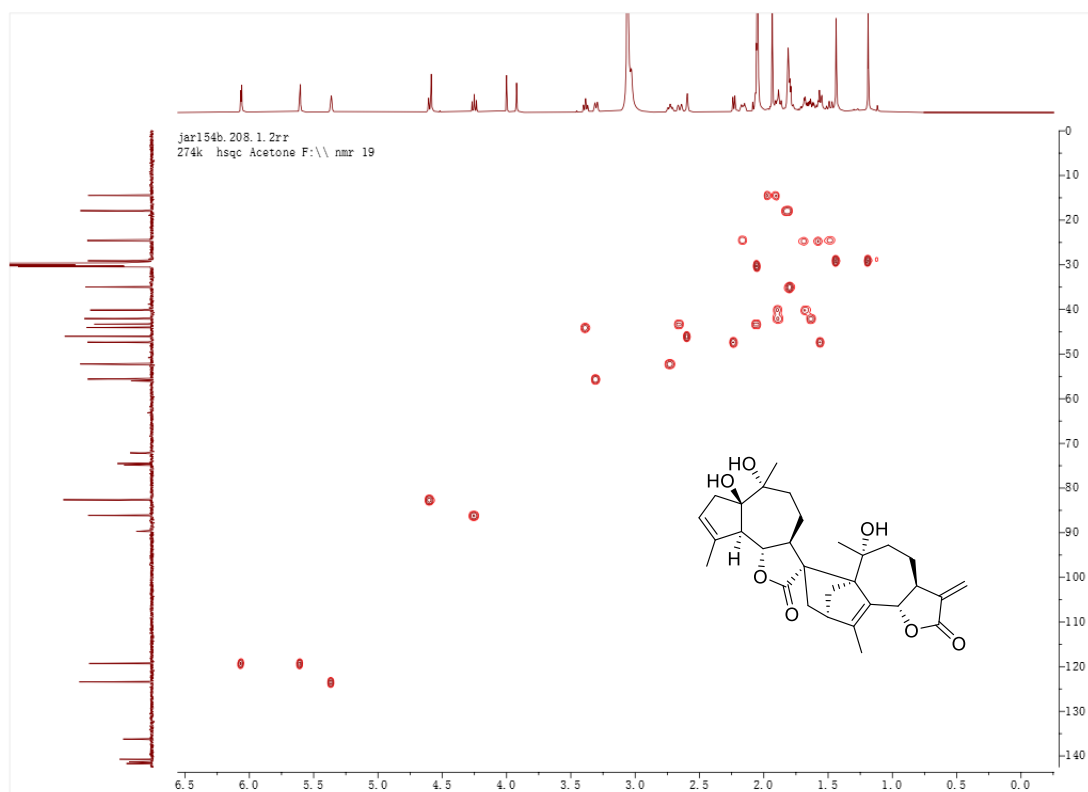

**Figure S233** HSQC spectrum (600 MHz) of lavandiolide C (**23**) in acetone- $d_6$ .

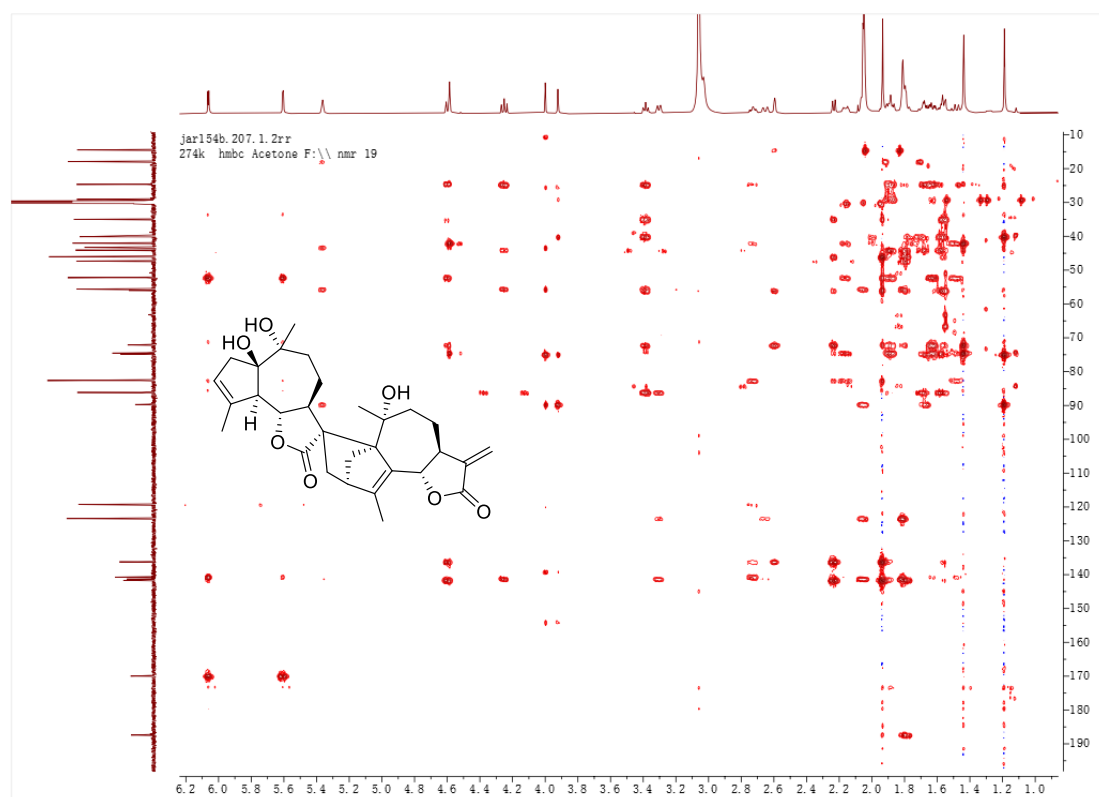

**Figure S234** HMBC spectrum (600 MHz) of lavandiolide C (**23**) in acetone- $d_6$ .

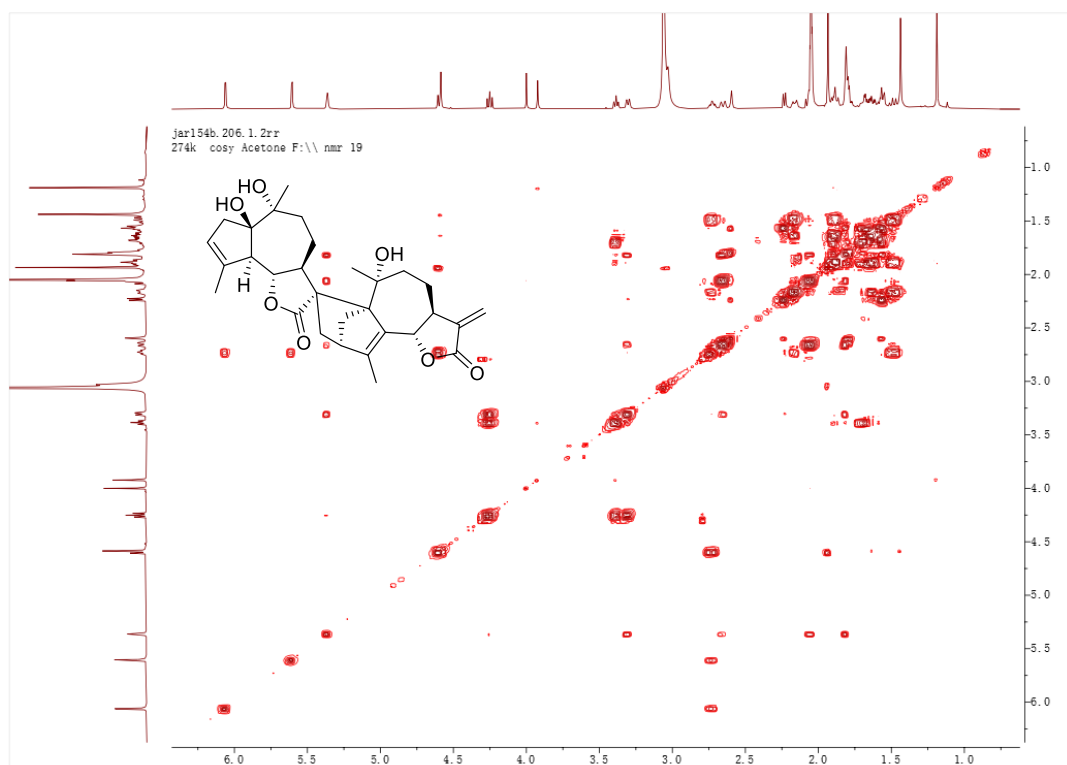

**Figure S235**  $^1\text{H}$ - $^1\text{H}$  COSY spectrum (600 MHz) of lavandiolid C (**23**) in acetone- $d_6$ .

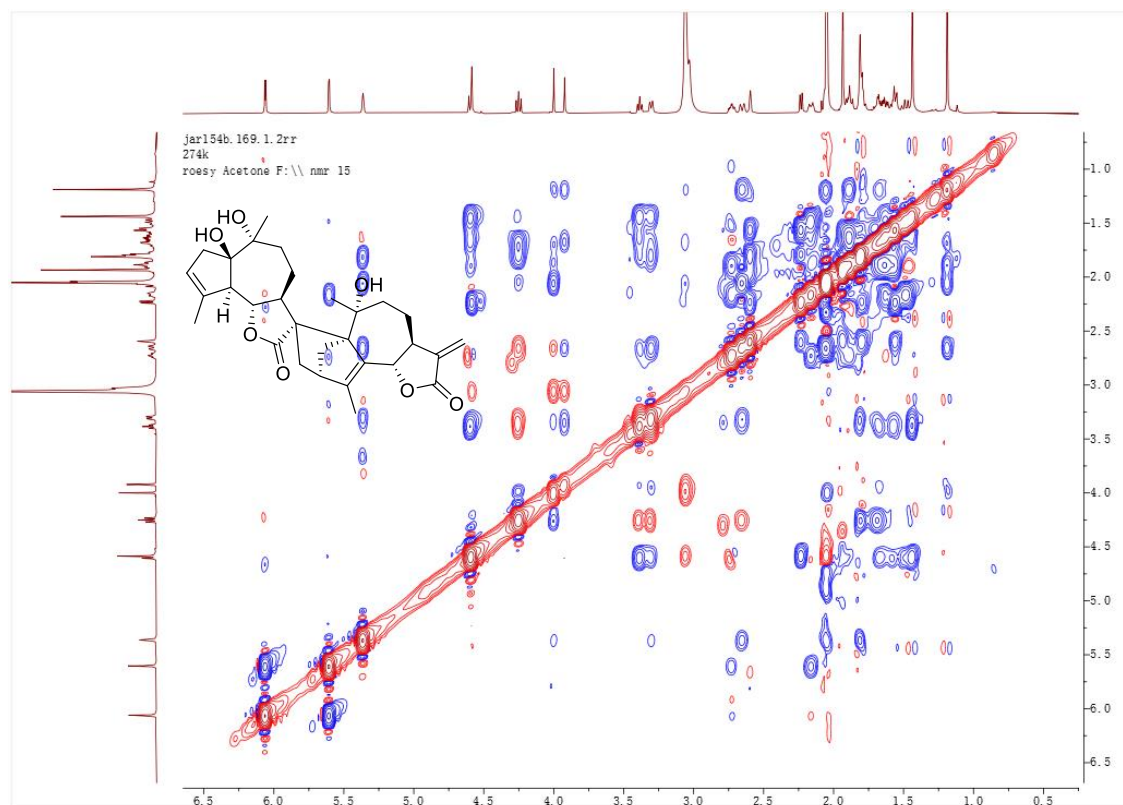

**Figure S236** ROESY spectrum (600 MHz) of lavandiolid C (**23**) in acetone- $d_6$ .

## 25. Cytotoxicity assays

### 24.1. Cell lines and cell culture

HepG2 cell line was obtained as a gift from Service Center for Bioactivity Screening (Kunming Institute of Botany, Chinese Academy of Sciences, Kunming, China). SMMC-7721 and Huh7 cell lines were purchased from the Shanghai Jining Biotechnology Co., Ltd. (Shanghai, China). HepG2 and Huh7 cells were cultured in Dulbecco's Modified Eagle's Medium (DMEM; Gibco, Thermo Fisher Scientific Co., Ltd., Suzhou, China) supplemented with 10% heat-inactivated fetal bovine serum (FBS; Gibco, Life Technologies, NY, USA). While the SMMC-7721 cells were cultured in RPMI-1640 (Gibco, Thermo Fisher Biochemical Products Co., Ltd., Beijing, China) with 10% heat-inactivated fetal bovine serum (FBS), at 37 °C in an atmosphere of 5% CO<sub>2</sub>, 95% air and > 95% humidity.

### 24.2. MTT assay

The cytotoxicity of the compounds **1–23** was tested by the MTT assay<sup>1–4</sup>. Briefly, cells in a density of  $3 \times 10^4$  cells/well were seeded into 96-well plates and incubated at 37 °C with 5% CO<sub>2</sub> for 24 h. The culture medium was replaced with fresh medium containing different concentrations of guaianolide dimers, and cells were incubated for additional 48 h. After removal of the medium, 100 μL of MTT reagent (1 mg/mL) was added into each well, and the plates were kept in incubator for 4 h. After that, 100 μL of dimethyl sulfoxide (DMSO) was added into each well, and the plates were measured at 490 nm using microplate reader (BIO-RAD, USA). The inhibitory ratio was calculated as  $[(A_{490 \text{ control}} - A_{490 \text{ treated}})/A_{490 \text{ control}}] \times 100\%$ . The cytotoxicity of compounds was expressed as IC<sub>50</sub> values calculated by GraphPad Prism 5 (GraphPad Software, California, USA).

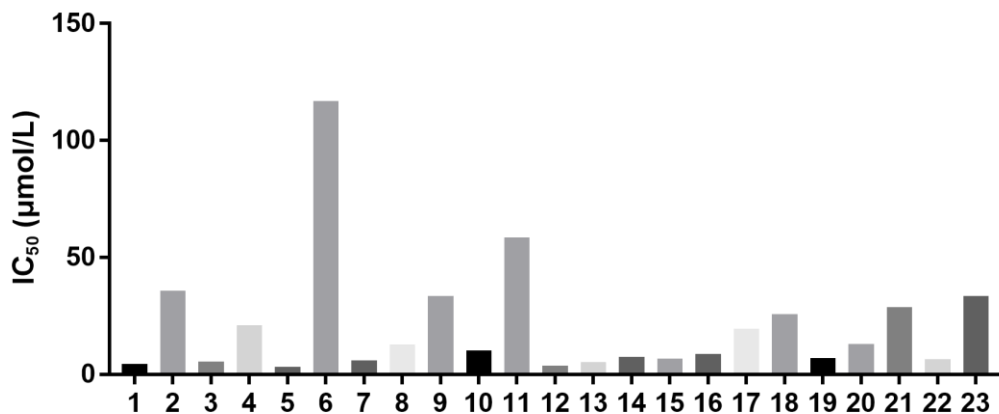

**Figure S237** Cytotoxicity of 1–23 from *A. atrovirens* against HepG2 cells. Sorafenib was used as the positive control (IC<sub>50</sub>: 7.7 μmol/L).

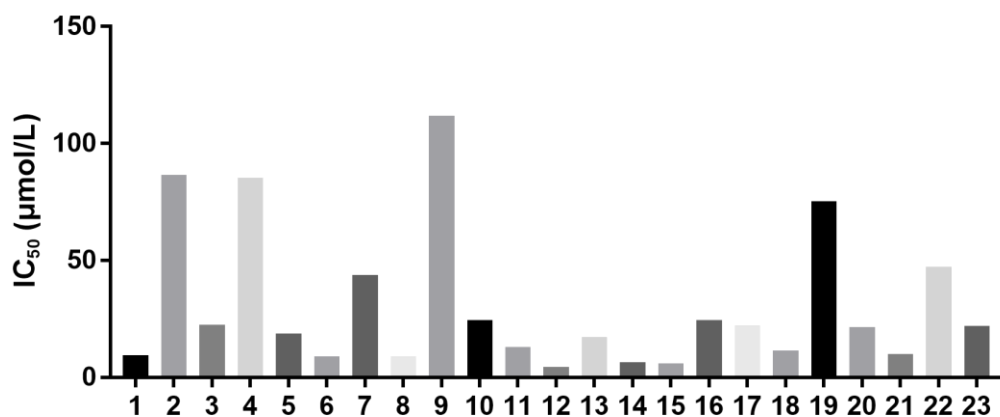

**Figure S238** Cytotoxicity of 1–23 from *A. atrovirens* against SMMC-7721 cells. Sorafenib was used as the positive control (IC<sub>50</sub>: 9.9 μmol/L).

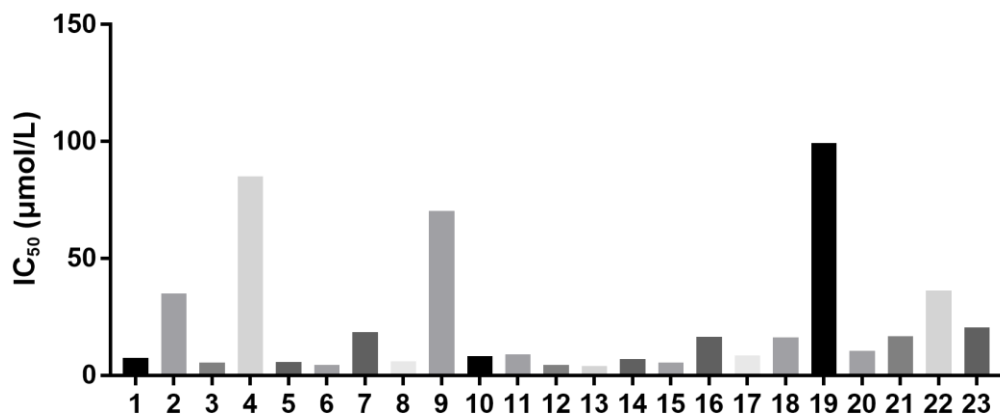

**Figure S239** Cytotoxicity of 1–23 from *A. atrovirens* against Huh7 cells. Sorafenib was used as the positive control (IC<sub>50</sub>: 8.3 μmol/L).

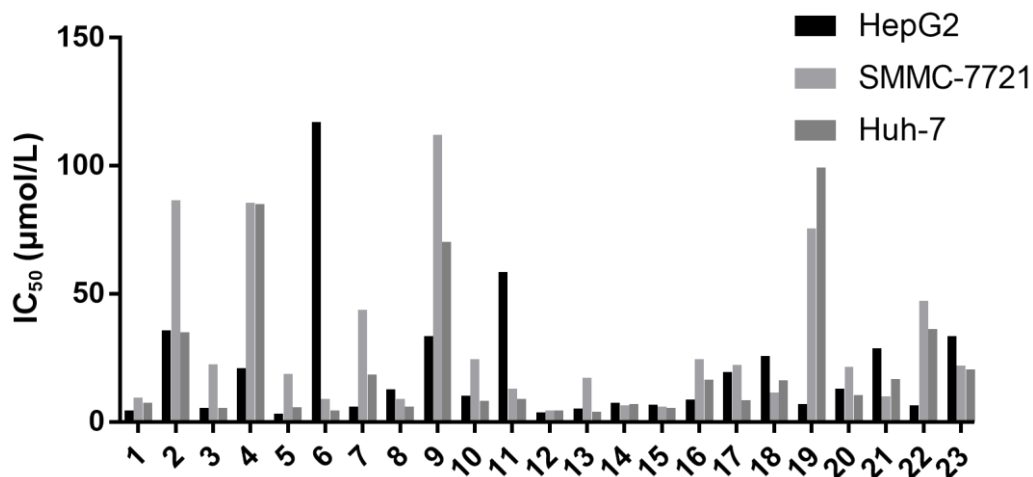

**Figure S240** Cytotoxicity of 1–23 from *A. atrovirens* against HepG2, SMMC-7721 and Huh7 cell lines. Sorafenib was used as the positive control ( $IC_{50}$ : 7.7, 9.9, 8.3  $\mu\text{mol/L}$ ).

## References

1. Ma L, Meng YY, Tu CH, Cao XQ, Wang HY, Li YY, et al. A cardiac glycoside HTF-1 isolated from *Helleborus thibetanus* Franch displays potent *in vitro* anti-cancer activity *via* caspase-9, MAPK and PI3K-Akt-mTOR pathways. *Eur J Med Chem* 2018;**158**:743–52.
2. Su LH, Geng CA, Li TZ, Huang XY, Ma YB, Zhang XM, et al. Spiroseoflosterol, a rearranged ergostane-steroid from the fruiting bodies of *Butyriboletus roseoflavus*. *J Nat Prod* 2020;**83**:1706–10.
3. Xue R, Han N, Ye C, Wang LH, Yang JY, Wang Y, et al. The cytotoxic activities of cardiac glycosides from *streptocaulon juvenas* and the structure–activity relationships. *Fitoterapia* 2014;**98**:228–33.
4. Xue R, Han N, Sakurai H, Saiki I, Ye C, Yin J. Cytotoxic cardiac glycosides from the roots of *Streptocaulon juvenas*. *Planta Med* 2013;**79**:157–62.

## 26. Computational data of compounds 2, 5–8, 11, 14–18, and 22

The ECD calculations for compounds 2, 5–8, 11, 14–18, and 22 were performed with the Gaussian 09 program package. Their relative configurations were generated by

referring to the related compounds that were confirmed by X-ray diffraction. The conformation search was performed by Spartan 14 software using molecular mechanics MMFF94s force field. The lowest-energy conformer was confirmed by the ROESY experiment, which was pre-optimized with MM2 method and further optimized by the DFT calculation at the b3lyp/6-31G(d,p) level in the gas phase. Frequency calculation was performed at the same level to exclude imaginary frequencies. ECD calculation was performed using the TD-DFT methodology at the b3lyp/6-311+g(d,p) level in methanol. Solvent effects were taken into consideration using the SCRF method with the IEFPCM model. The calculated ECD spectra were simulated by the SpecDis program with  $\sigma = \sim 0.3 \text{ eV}$ .<sup>5-6</sup>

## References

5. Frisch M J, Trucks GW, Schlegel HB, Scuseria GE, Robb MA, Cheeseman JR, et al. *Gaussian 09*, Revision C.01; Gaussian, Inc., Wallingford CT: **2010**.
6. Willoughby PH, Jansma MJ, Hoye TR. *Nat Protoc* 2014; **9**:643–60.

The lowest-energy conformers of the calculated compounds

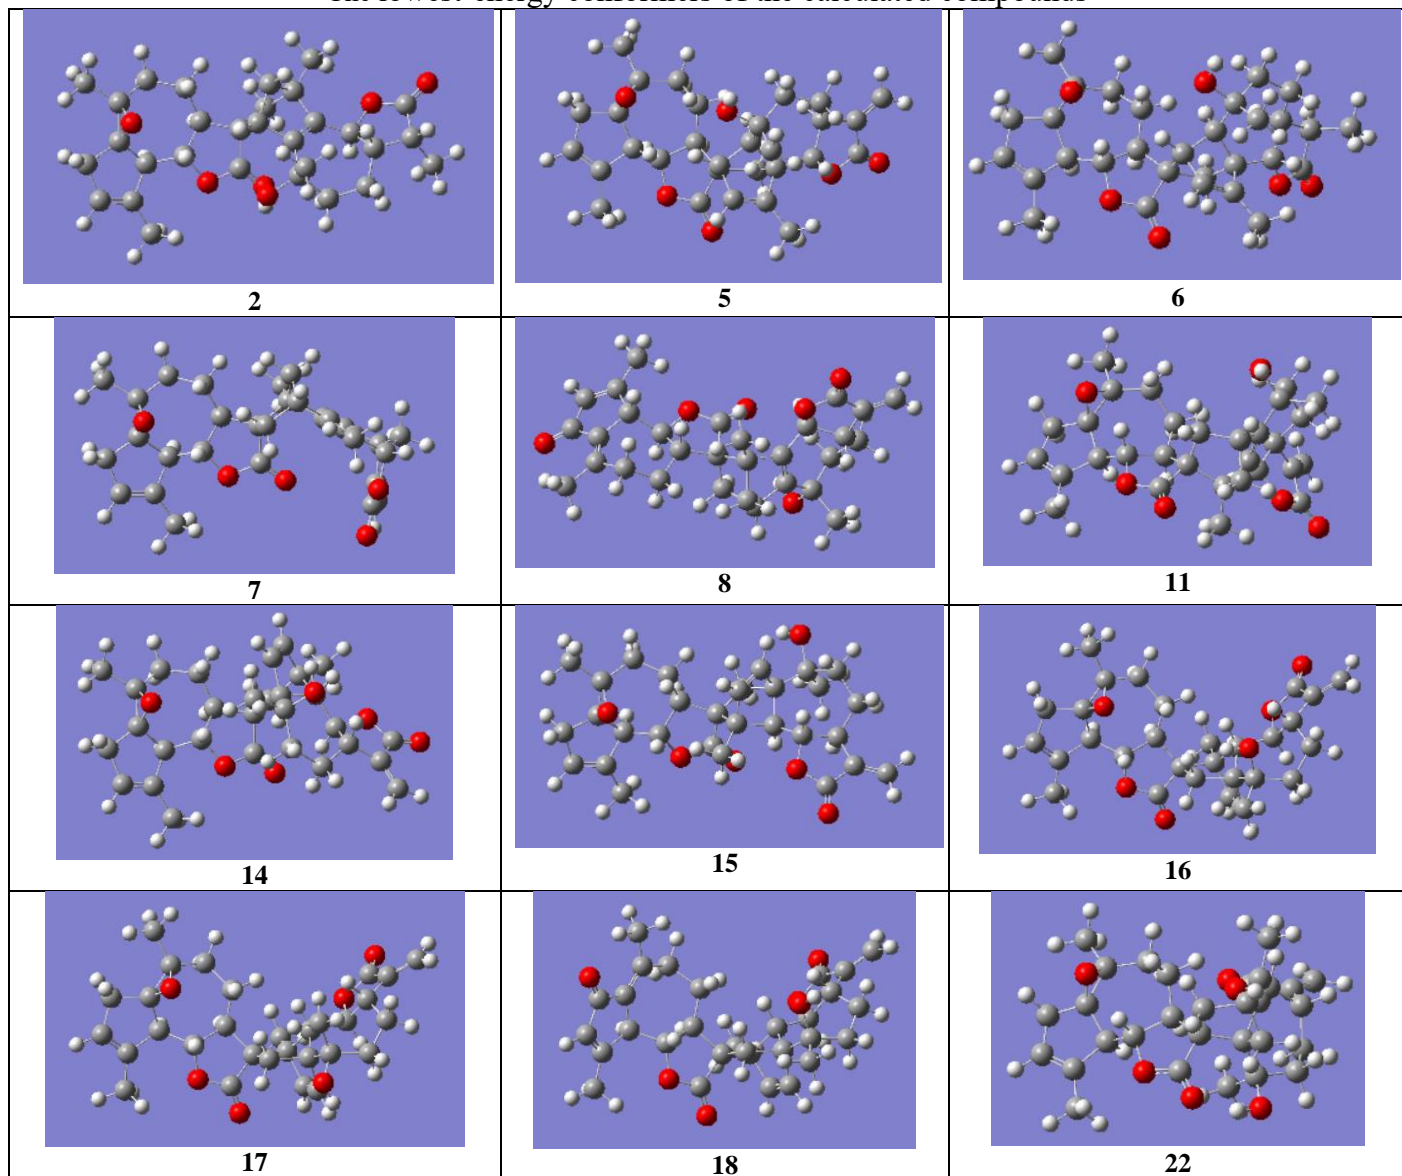

**Cartesian coordinates of the lowest-energy formers optimized at the b3lyp/6-311+g(d,p) level**

Standard orientation of 2

| Center number | Atomic number | Atomic type | Coordinates (Angstroms) |           |           |
|---------------|---------------|-------------|-------------------------|-----------|-----------|
|               |               |             | X                       | Y         | Z         |
| 1             | 6             | 0           | 6.034827                | -0.230228 | 0.241017  |
| 2             | 6             | 0           | -4.091139               | -0.552002 | -0.769377 |
| 3             | 6             | 0           | -5.075871               | 0.175400  | 0.177658  |
| 4             | 6             | 0           | -6.359010               | -0.660982 | 0.231739  |
| 5             | 6             | 0           | 5.860907                | 1.169662  | -0.345315 |
| 6             | 6             | 0           | 4.248791                | -2.117461 | 0.659869  |
| 7             | 6             | 0           | 2.763975                | -2.475014 | 0.475372  |
| 8             | 6             | 0           | 1.704653                | -1.669909 | 1.259543  |
| 9             | 6             | 0           | 1.544928                | -0.236980 | 0.755515  |
| 10            | 6             | 0           | -2.470732               | 2.118542  | 0.262352  |
| 11            | 6             | 0           | -3.925785               | 2.534308  | -0.014497 |
| 12            | 6             | 0           | 4.581515                | -0.622116 | 0.588567  |
| 13            | 6             | 0           | -5.016000               | 1.608171  | 0.529214  |
| 14            | 6             | 0           | -0.546968               | -0.831892 | -1.173391 |
| 15            | 6             | 0           | -4.685021               | -1.962435 | -0.847885 |
| 16            | 6             | 0           | -4.018153               | -3.117976 | -1.534521 |
| 17            | 6             | 0           | -5.915126               | -1.985473 | -0.320173 |
| 18            | 6             | 0           | -6.280553               | 2.339444  | 0.938079  |
| 19            | 6             | 0           | 0.216457                | 0.505769  | 0.898310  |
| 20            | 6             | 0           | 0.738148                | 1.948125  | 1.023367  |
| 21            | 6             | 0           | 2.370943                | 3.151868  | -0.601270 |
| 22            | 6             | 0           | 1.959339                | -1.683382 | 2.774006  |
| 23            | 6             | 0           | 3.749748                | 0.190173  | -0.433265 |
| 24            | 6             | 0           | 6.778278                | -1.112980 | -0.777558 |
| 25            | 6             | 0           | 2.381968                | 0.570532  | 0.067788  |
| 26            | 6             | 0           | 1.612779                | 1.876985  | -0.249392 |
| 27            | 6             | 0           | 0.513584                | 1.499633  | -1.308367 |
| 28            | 6             | 0           | -0.464083               | 0.558373  | -0.551216 |
| 29            | 6             | 0           | -1.974223               | 0.940842  | -0.576148 |
| 30            | 6             | 0           | -2.641082               | -0.416969 | -0.298188 |
| 31            | 1             | 0           | -7.162284               | -0.218693 | -0.376415 |
| 32            | 1             | 0           | -3.115165               | -3.439611 | -1.008695 |
| 33            | 1             | 0           | -4.704734               | -3.966795 | -1.602586 |
| 34            | 1             | 0           | -3.698973               | -2.848208 | -2.547987 |
| 35            | 1             | 0           | -6.729527               | -0.716241 | 1.261325  |
| 36            | 1             | 0           | -6.558065               | -2.860835 | -0.321041 |
| 37            | 1             | 0           | -6.688678               | 2.901500  | 0.090279  |
| 38            | 1             | 0           | -6.055086               | 3.056470  | 1.734807  |
| 39            | 1             | 0           | -7.049260               | 1.656875  | 1.302403  |
| 40            | 1             | 0           | -2.353022               | 1.911854  | 1.330267  |
| 41            | 1             | 0           | -2.201368               | 1.177602  | -1.628972 |
| 42            | 1             | 0           | 3.665013                | -0.344948 | -1.391102 |
| 43            | 1             | 0           | -0.444178               | 0.123977  | 1.676522  |
| 44            | 1             | 0           | 1.331796                | 2.094002  | 1.930389  |
| 45            | 1             | 0           | -0.028612               | 2.724251  | 0.968726  |
| 46            | 1             | 0           | 3.109811                | 3.406051  | 0.162241  |
| 47            | 1             | 0           | 2.903449                | 3.068750  | -1.550788 |
| 48            | 1             | 0           | 1.659258                | 3.982484  | -0.679954 |
| 49            | 1             | 0           | 1.136837                | -1.188152 | 3.297604  |
| 50            | 1             | 0           | 2.888733                | -1.170977 | 3.034276  |



|    |   |   |           |           |           |
|----|---|---|-----------|-----------|-----------|
| 51 | 1 | 0 | 2.009697  | -2.717703 | 3.127756  |
| 52 | 1 | 0 | 2.499890  | -2.396759 | -0.585899 |
| 53 | 1 | 0 | -0.004901 | 2.406609  | -1.641512 |
| 54 | 1 | 0 | 2.625245  | -3.525751 | 0.754127  |
| 55 | 1 | 0 | 4.610525  | -2.505542 | 1.619400  |
| 56 | 1 | 0 | 4.803604  | -2.659645 | -0.112961 |
| 57 | 1 | 0 | 4.357960  | -0.169909 | 1.562068  |
| 58 | 1 | 0 | 7.007608  | -2.095422 | -0.356373 |
| 59 | 1 | 0 | 7.720063  | -0.631428 | -1.053754 |
| 60 | 1 | 0 | 0.359300  | -2.588230 | 0.171122  |
| 61 | 1 | 0 | 0.942319  | 1.016436  | -2.189823 |
| 62 | 1 | 0 | -1.848163 | 2.989453  | 0.031612  |
| 63 | 1 | 0 | -4.079878 | 2.675064  | -1.093739 |
| 64 | 1 | 0 | -4.078028 | 3.522005  | 0.437233  |
| 65 | 1 | 0 | -4.150316 | -0.102489 | -1.774902 |
| 66 | 1 | 0 | -2.572714 | -0.685479 | 0.760090  |
| 67 | 8 | 0 | 0.446436  | -2.357731 | 1.108438  |
| 68 | 8 | 0 | 6.707516  | 2.006523  | -0.528416 |
| 69 | 8 | 0 | 4.558991  | 1.368610  | -0.695005 |
| 70 | 8 | 0 | -1.793236 | -1.341584 | -1.038526 |
| 71 | 8 | 0 | 0.329788  | -1.467686 | -1.720114 |
| 72 | 8 | 0 | -4.567219 | 0.598404  | 1.464616  |
| 73 | 1 | 0 | 6.654591  | -0.142159 | 1.138544  |
| 74 | 1 | 0 | 6.196502  | -1.262874 | -1.693217 |

---

Rotational constants (GHZ):      0.2656443      0.0623354      0.0560255

Standard orientation of **5**

---

| Center<br>Number | Atomic<br>Number | Atomic<br>Type | Coordinates (Angstroms) |           |           |
|------------------|------------------|----------------|-------------------------|-----------|-----------|
|                  |                  |                | X                       | Y         | Z         |
| 1                | 6                | 0              | -4.804981               | -1.133956 | -1.610604 |
| 2                | 6                | 0              | 3.999081                | 0.390562  | -0.704547 |
| 3                | 6                | 0              | 4.531793                | -1.018104 | -0.347914 |
| 4                | 6                | 0              | 6.059319                | -0.922383 | -0.268568 |
| 5                | 6                | 0              | -4.708040               | 0.205124  | -2.275507 |
| 6                | 6                | 0              | -4.087533               | -1.944902 | 0.751278  |
| 7                | 6                | 0              | -2.894049               | -2.217352 | 1.686984  |
| 8                | 6                | 0              | -2.076150               | -1.020341 | 2.249154  |
| 9                | 6                | 0              | -1.383167               | -0.281882 | 1.076752  |
| 10               | 6                | 0              | 1.313563                | -1.488577 | -0.435609 |
| 11               | 6                | 0              | 2.391497                | -2.314765 | -1.159084 |
| 12               | 6                | 0              | -3.748749               | -1.173225 | -0.532041 |
| 13               | 6                | 0              | 3.799322                | -2.282167 | -0.560755 |
| 14               | 6                | 0              | 1.019925                | 2.305244  | -0.219507 |
| 15               | 6                | 0              | 5.194046                | 1.291910  | -0.375698 |
| 16               | 6                | 0              | 5.150917                | 2.791226  | -0.414447 |
| 17               | 6                | 0              | 6.293702                | 0.557697  | -0.165564 |
| 18               | 6                | 0              | 4.566377                | -3.576824 | -0.753170 |
| 19               | 6                | 0              | -0.215249               | 0.693173  | 1.371710  |
| 20               | 6                | 0              | -0.960147               | 1.946066  | 1.786484  |
| 21               | 6                | 0              | -3.061506               | 3.147247  | 0.971538  |
| 22               | 6                | 0              | -2.918187               | -0.179611 | 3.216819  |
| 23               | 6                | 0              | -3.527269               | 0.335120  | -0.289478 |

|    |   |   |           |           |           |
|----|---|---|-----------|-----------|-----------|
| 24 | 6 | 0 | -5.706949 | -2.039713 | -1.987128 |
| 25 | 6 | 0 | -2.145818 | 0.752250  | 0.196831  |
| 26 | 6 | 0 | -2.093788 | 2.012612  | 1.075752  |
| 27 | 6 | 0 | -1.052680 | 0.960457  | -0.917355 |
| 28 | 6 | 0 | 0.292087  | 0.959624  | -0.127761 |
| 29 | 6 | 0 | 1.428710  | 0.023812  | -0.632916 |
| 30 | 6 | 0 | 2.667713  | 0.692445  | -0.009284 |
| 31 | 1 | 0 | 6.543040  | -1.346923 | -1.161185 |
| 32 | 1 | 0 | 4.516832  | 3.203207  | 0.374936  |
| 33 | 1 | 0 | 6.158709  | 3.203103  | -0.307558 |
| 34 | 1 | 0 | 4.727009  | 3.151414  | -1.358937 |
| 35 | 1 | 0 | 6.428294  | -1.487054 | 0.594904  |
| 36 | 1 | 0 | 7.277367  | 0.979606  | 0.019203  |
| 37 | 1 | 0 | 4.640612  | -3.823021 | -1.818630 |
| 38 | 1 | 0 | 4.039678  | -4.399522 | -0.257535 |
| 39 | 1 | 0 | 5.574556  | -3.521048 | -0.340641 |
| 40 | 1 | 0 | 1.309195  | -1.746005 | 0.627913  |
| 41 | 1 | 0 | 1.501619  | 0.203431  | -1.718434 |
| 42 | 1 | 0 | -4.279914 | 0.665899  | 0.438595  |
| 43 | 1 | 0 | 0.553256  | 0.327683  | 2.051412  |
| 44 | 1 | 0 | -0.551891 | 2.728471  | 2.416559  |
| 45 | 1 | 0 | -5.796611 | -3.009753 | -1.508213 |
| 46 | 1 | 0 | -2.770529 | 3.969353  | 1.630349  |
| 47 | 1 | 0 | -3.099708 | 3.530512  | -0.055174 |
| 48 | 1 | 0 | -4.085053 | 2.849613  | 1.233145  |
| 49 | 1 | 0 | -2.306941 | 0.579843  | 3.703776  |
| 50 | 1 | 0 | -3.342713 | -0.835180 | 3.988523  |
| 51 | 1 | 0 | -3.751966 | 0.325625  | 2.722084  |
| 52 | 1 | 0 | -2.178712 | -2.870215 | 1.172025  |
| 53 | 1 | 0 | -1.081545 | 0.141880  | -1.645457 |
| 54 | 1 | 0 | -3.268263 | -2.792866 | 2.545331  |
| 55 | 1 | 0 | -4.509851 | -2.918601 | 0.476217  |
| 56 | 1 | 0 | -4.885979 | -1.413113 | 1.284254  |
| 57 | 1 | 0 | -2.835074 | -1.596942 | -0.976528 |
| 58 | 1 | 0 | -6.384988 | -1.812046 | -2.803922 |
| 59 | 1 | 0 | -1.318877 | -2.099506 | 3.706377  |
| 60 | 1 | 0 | -1.204409 | 1.895797  | -1.457424 |
| 61 | 1 | 0 | 0.351233  | -1.814155 | -0.847051 |
| 62 | 1 | 0 | 2.446334  | -2.020276 | -2.216618 |
| 63 | 1 | 0 | 2.059398  | -3.360115 | -1.159823 |
| 64 | 1 | 0 | 3.820253  | 0.450445  | -1.791363 |
| 65 | 1 | 0 | 2.753001  | 0.446203  | 1.053806  |
| 66 | 8 | 0 | -0.961268 | -1.581777 | 2.971752  |
| 67 | 8 | 0 | -5.245412 | 0.588610  | -3.284018 |
| 68 | 8 | 0 | -3.862480 | 0.991517  | -1.542240 |
| 69 | 8 | 0 | 2.364907  | 2.108544  | -0.119622 |
| 70 | 8 | 0 | 0.553351  | 3.406695  | -0.366842 |
| 71 | 8 | 0 | 3.904224  | -1.703626 | 0.761661  |
| 72 | 1 | 0 | -1.016701 | -1.090047 | 0.441372  |

-----  
Rotational constants (GHZ):           0.1991333           0.0701674           0.0653589

Standard orientation of **6**

-----  
Center      Atomic      Atomic      Coordinates (Angstroms)  
Number     Number     Type        X            Y            Z

---

|    |   |   |           |           |           |
|----|---|---|-----------|-----------|-----------|
| 1  | 6 | 0 | -4.803815 | -1.121967 | -1.706739 |
| 2  | 6 | 0 | 4.053774  | 0.430047  | -0.663309 |
| 3  | 6 | 0 | 4.592546  | -0.992071 | -0.376127 |
| 4  | 6 | 0 | 6.119347  | -0.893157 | -0.289218 |
| 5  | 6 | 0 | -4.507664 | 0.207189  | -2.405243 |
| 6  | 6 | 0 | -4.049219 | -1.981148 | 0.656005  |
| 7  | 6 | 0 | -2.853138 | -2.304208 | 1.570795  |
| 8  | 6 | 0 | -2.038139 | -1.135814 | 2.187812  |
| 9  | 6 | 0 | -1.341211 | -0.349603 | 1.050292  |
| 10 | 6 | 0 | 1.377197  | -1.474569 | -0.495299 |
| 11 | 6 | 0 | 2.460780  | -2.259025 | -1.255601 |
| 12 | 6 | 0 | -3.718004 | -1.172671 | -0.607063 |
| 13 | 6 | 0 | 3.867103  | -2.247774 | -0.653071 |
| 14 | 6 | 0 | 1.062602  | 2.303398  | -0.106369 |
| 15 | 6 | 0 | 5.243303  | 1.319440  | -0.285685 |
| 16 | 6 | 0 | 5.192355  | 2.818504  | -0.247367 |
| 17 | 6 | 0 | 6.346286  | 0.580986  | -0.110603 |
| 18 | 6 | 0 | 4.641551  | -3.527367 | -0.907429 |
| 19 | 6 | 0 | -0.181294 | 0.617501  | 1.397974  |
| 20 | 6 | 0 | -0.937784 | 1.847886  | 1.856869  |
| 21 | 6 | 0 | -3.035789 | 3.072928  | 1.072382  |
| 22 | 6 | 0 | -2.884192 | -0.336509 | 3.186434  |
| 23 | 6 | 0 | -3.476520 | 0.323617  | -0.332764 |
| 24 | 6 | 0 | -6.267706 | -1.123820 | -1.228205 |
| 25 | 6 | 0 | -2.101578 | 0.715737  | 0.205621  |
| 26 | 6 | 0 | -2.064985 | 1.937913  | 1.138453  |
| 27 | 6 | 0 | -0.994668 | 0.978914  | -0.884581 |
| 28 | 6 | 0 | 0.340829  | 0.951736  | -0.082145 |
| 29 | 6 | 0 | 1.486130  | 0.045633  | -0.620231 |
| 30 | 6 | 0 | 2.718113  | 0.690631  | 0.040606  |
| 31 | 1 | 0 | 6.606253  | -1.269444 | -1.201537 |
| 32 | 1 | 0 | 4.551391  | 3.185928  | 0.558276  |
| 33 | 1 | 0 | 6.197269  | 3.229525  | -0.113246 |
| 34 | 1 | 0 | 4.772043  | 3.224895  | -1.174590 |
| 35 | 1 | 0 | 6.489979  | -1.499057 | 0.545100  |
| 36 | 1 | 0 | 7.327405  | 0.997721  | 0.097973  |
| 37 | 1 | 0 | 4.717363  | -3.721344 | -1.983548 |
| 38 | 1 | 0 | 4.119163  | -4.375977 | -0.452594 |
| 39 | 1 | 0 | 5.649332  | -3.486176 | -0.492259 |
| 40 | 1 | 0 | 1.372231  | -1.782390 | 0.554583  |
| 41 | 1 | 0 | 1.564785  | 0.275972  | -1.695788 |
| 42 | 1 | 0 | -4.248250 | 0.673920  | 0.365744  |
| 43 | 1 | 0 | 0.581509  | 0.227416  | 2.070521  |
| 44 | 1 | 0 | -0.540286 | 2.605958  | 2.522594  |
| 45 | 1 | 0 | -2.747319 | 3.873236  | 1.758568  |
| 46 | 1 | 0 | -3.074171 | 3.490771  | 0.059113  |
| 47 | 1 | 0 | -4.058874 | 2.764768  | 1.324185  |
| 48 | 1 | 0 | -2.274828 | 0.400496  | 3.709005  |
| 49 | 1 | 0 | -3.312923 | -1.024346 | 3.927225  |
| 50 | 1 | 0 | -3.714963 | 0.191148  | 2.710088  |
| 51 | 1 | 0 | -3.224881 | -2.921659 | 2.400842  |
| 52 | 1 | 0 | -1.011058 | 0.191884  | -1.646707 |
| 53 | 1 | 0 | -2.140177 | -2.931313 | 1.021714  |
| 54 | 1 | 0 | -4.830960 | -1.463250 | 1.225480  |
| 55 | 1 | 0 | -4.488621 | -2.939345 | 0.352287  |
| 56 | 1 | 0 | -2.811175 | -1.589280 | -1.066136 |

|    |   |   |           |           |           |
|----|---|---|-----------|-----------|-----------|
| 57 | 1 | 0 | -6.528433 | -2.078559 | -0.763324 |
| 58 | 1 | 0 | -6.929874 | -0.966111 | -2.083418 |
| 59 | 1 | 0 | -1.287416 | -2.282712 | 3.595838  |
| 60 | 1 | 0 | -1.146521 | 1.935065  | -1.386651 |
| 61 | 1 | 0 | 0.417150  | -1.784006 | -0.923927 |
| 62 | 1 | 0 | 2.515966  | -1.912736 | -2.297403 |
| 63 | 1 | 0 | 2.134700  | -3.304970 | -1.308045 |
| 64 | 1 | 0 | 3.878545  | 0.543530  | -1.746441 |
| 65 | 1 | 0 | 2.800545  | 0.394461  | 1.091087  |
| 66 | 8 | 0 | -0.926011 | -1.726898 | 2.891503  |
| 67 | 8 | 0 | -4.891375 | 0.576487  | -3.484720 |
| 68 | 8 | 0 | -3.735315 | 0.990074  | -1.597099 |
| 69 | 8 | 0 | 2.407899  | 2.108716  | -0.003910 |
| 70 | 8 | 0 | 0.592176  | 3.408458  | -0.207127 |
| 71 | 8 | 0 | 3.966001  | -1.734793 | 0.696625  |
| 72 | 1 | 0 | -4.678187 | -1.925445 | -2.438765 |
| 73 | 1 | 0 | -6.464824 | -0.327966 | -0.502406 |
| 74 | 1 | 0 | -0.966151 | -1.131090 | 0.387234  |

---

Rotational constants (GHZ):      0.2027094      0.0690285      0.0646955

Standard orientation of 7

---

| Center<br>Number | Atomic<br>Number | Atomic<br>Type | Coordinates (Angstroms) |           |           |
|------------------|------------------|----------------|-------------------------|-----------|-----------|
|                  |                  |                | X                       | Y         | Z         |
| 1                | 6                | 0              | -4.810149               | 0.287026  | -0.173678 |
| 2                | 6                | 0              | -3.579971               | 1.134827  | 0.226139  |
| 3                | 6                | 0              | -2.268668               | 0.533670  | -0.290417 |
| 4                | 6                | 0              | -1.735240               | -0.676276 | 0.495328  |
| 5                | 6                | 0              | -2.535683               | -1.972695 | 0.343660  |
| 6                | 6                | 0              | -3.951115               | -1.929085 | 0.946741  |
| 7                | 6                | 0              | -5.000628               | -1.136946 | 0.163834  |
| 8                | 6                | 0              | -5.962052               | 1.255999  | -0.460087 |
| 9                | 6                | 0              | -5.256187               | 2.572698  | -0.615297 |
| 10               | 6                | 0              | -3.962518               | 2.533128  | -0.272482 |
| 11               | 6                | 0              | -3.037771               | 3.714561  | -0.253322 |
| 12               | 8                | 0              | -4.612007               | -0.741357 | -1.173406 |
| 13               | 6                | 0              | -6.400912               | -1.708500 | 0.278518  |
| 14               | 8                | 0              | -1.200989               | 1.501638  | -0.150129 |
| 15               | 6                | 0              | -0.005281               | 0.881122  | 0.072124  |
| 16               | 6                | 0              | -0.219515               | -0.643778 | 0.118046  |
| 17               | 8                | 0              | 1.009962                | 1.519901  | 0.167193  |
| 18               | 6                | 0              | 0.768403                | -1.446666 | 1.070303  |
| 19               | 6                | 0              | 2.220567                | -1.012201 | 0.767675  |
| 20               | 6                | 0              | 2.504420                | -1.502894 | -0.604776 |
| 21               | 6                | 0              | 1.246218                | -2.271185 | -0.999227 |
| 22               | 6                | 0              | 0.802521                | -2.829354 | 0.362839  |
| 23               | 6                | 0              | 2.996950                | -0.354627 | 1.639913  |
| 24               | 6                | 0              | 4.431149                | 0.092457  | 1.474527  |
| 25               | 6                | 0              | 5.256822                | -0.752988 | 0.506933  |
| 26               | 6                | 0              | 4.829872                | -0.565203 | -0.945340 |
| 27               | 6                | 0              | 3.578745                | -1.299632 | -1.393388 |
| 28               | 1                | 0              | -3.506117               | 1.177575  | 1.326002  |
| 29               | 6                | 0              | 0.391875                | -1.449101 | 2.546495  |
| 30               | 6                | 0              | 0.117346                | -1.251010 | -1.300170 |

|    |   |   |           |           |           |
|----|---|---|-----------|-----------|-----------|
| 31 | 6 | 0 | 3.647088  | -1.742678 | -2.834758 |
| 32 | 6 | 0 | 4.480690  | 1.547016  | 1.025900  |
| 33 | 8 | 0 | 4.717696  | 0.839120  | -1.322440 |
| 34 | 6 | 0 | 4.506497  | 1.857441  | -0.443754 |
| 35 | 8 | 0 | 4.414827  | 2.979598  | -0.887980 |
| 36 | 6 | 0 | 4.517167  | 2.578397  | 1.874797  |
| 37 | 1 | 0 | -2.374935 | 0.296184  | -1.354380 |
| 38 | 1 | 0 | -1.791983 | -0.383810 | 1.554474  |
| 39 | 1 | 0 | -2.002279 | -2.775026 | 0.861052  |
| 40 | 1 | 0 | -2.612636 | -2.264279 | -0.707801 |
| 41 | 1 | 0 | -4.308513 | -2.963160 | 1.022920  |
| 42 | 1 | 0 | -3.912720 | -1.551459 | 1.978343  |
| 43 | 1 | 0 | -6.506358 | 0.940458  | -1.357204 |
| 44 | 1 | 0 | -6.689548 | 1.281431  | 0.365155  |
| 45 | 1 | 0 | -5.769991 | 3.474015  | -0.936650 |
| 46 | 1 | 0 | -2.210931 | 3.599290  | -0.958851 |
| 47 | 1 | 0 | -3.585256 | 4.629273  | -0.498593 |
| 48 | 1 | 0 | -2.575479 | 3.840500  | 0.732537  |
| 49 | 1 | 0 | -7.132782 | -1.111528 | -0.267144 |
| 50 | 1 | 0 | -6.422417 | -2.726938 | -0.124235 |
| 51 | 1 | 0 | -6.708938 | -1.759604 | 1.329159  |
| 52 | 1 | 0 | 1.387024  | -3.004816 | -1.793439 |
| 53 | 1 | 0 | -0.161059 | -3.341917 | 0.325506  |
| 54 | 1 | 0 | 1.541632  | -3.498077 | 0.815352  |
| 55 | 1 | 0 | 2.543962  | -0.028046 | 2.572570  |
| 56 | 1 | 0 | 4.902487  | 0.036581  | 2.463990  |
| 57 | 1 | 0 | 6.308126  | -0.456599 | 0.599102  |
| 58 | 1 | 0 | 5.191869  | -1.815647 | 0.760981  |
| 59 | 1 | 0 | 5.648704  | -0.921723 | -1.580605 |
| 60 | 1 | 0 | 1.145313  | -1.988104 | 3.128314  |
| 61 | 1 | 0 | 0.322821  | -0.433650 | 2.952171  |
| 62 | 1 | 0 | -0.570812 | -1.939963 | 2.715410  |
| 63 | 1 | 0 | -0.753545 | -1.758301 | -1.725669 |
| 64 | 1 | 0 | 0.439654  | -0.490643 | -2.016336 |
| 65 | 1 | 0 | 3.905571  | -0.884271 | -3.467262 |
| 66 | 1 | 0 | 4.435320  | -2.493013 | -2.986657 |
| 67 | 1 | 0 | 2.710213  | -2.158682 | -3.206418 |
| 68 | 1 | 0 | 4.526385  | 3.595325  | 1.499379  |
| 69 | 1 | 0 | 4.527472  | 2.426286  | 2.950467  |

-----  
Rotational constants (GHZ):           0.2508610           0.0719881           0.0643598

Standard orientation of **8**

| Center<br>Number | Atomic<br>Number | Atomic<br>Type | Coordinates (Angstroms) |           |           |
|------------------|------------------|----------------|-------------------------|-----------|-----------|
|                  |                  |                | X                       | Y         | Z         |
| 1                | 1                | 0              | 6.280304                | -0.971629 | -2.861925 |
| 2                | 1                | 0              | -6.920490               | -2.974378 | 0.178733  |
| 3                | 1                | 0              | -7.250059               | -1.353822 | -0.674072 |
| 4                | 8                | 0              | -2.355623               | 3.235531  | -1.609345 |
| 5                | 1                | 0              | -1.827268               | 2.713855  | -2.230011 |
| 6                | 8                | 0              | -0.604395               | -0.670426 | -1.754689 |
| 7                | 8                | 0              | 1.601864                | -0.680102 | -1.446236 |
| 8                | 8                | 0              | -3.131892               | -1.951688 | 0.869160  |
| 9                | 8                | 0              | -4.601706               | -3.551484 | 1.481913  |

|    |   |   |           |           |           |
|----|---|---|-----------|-----------|-----------|
| 10 | 6 | 0 | 3.694691  | -2.243891 | -2.821890 |
| 11 | 1 | 0 | 4.342505  | -2.493533 | -3.665816 |
| 12 | 1 | 0 | 2.789688  | -1.757031 | -3.194387 |
| 13 | 1 | 0 | 3.366051  | -3.176255 | -2.346585 |
| 14 | 6 | 0 | 4.412108  | -1.376450 | -1.836690 |
| 15 | 6 | 0 | 3.837016  | -1.022138 | -0.464497 |
| 16 | 1 | 0 | 3.585243  | -1.952343 | 0.068197  |
| 17 | 6 | 0 | 2.570572  | -0.147438 | -0.508142 |
| 18 | 1 | 0 | 2.853531  | 0.852474  | -0.862669 |
| 19 | 6 | 0 | 1.771069  | -0.068842 | 0.800668  |
| 20 | 1 | 0 | 1.658707  | -1.109672 | 1.135623  |
| 21 | 6 | 0 | 0.364482  | 0.370989  | 0.288550  |
| 22 | 6 | 0 | -0.874591 | 0.083825  | 1.270165  |
| 23 | 6 | 0 | -2.165936 | 0.261045  | 0.427179  |
| 24 | 6 | 0 | -3.105156 | -0.815670 | -0.045829 |
| 25 | 1 | 0 | -2.771086 | -1.209750 | -1.011565 |
| 26 | 6 | 0 | -4.578135 | -0.344758 | -0.115719 |
| 27 | 1 | 0 | -4.721235 | 0.320372  | 0.747947  |
| 28 | 6 | 0 | -5.322571 | -1.620266 | 0.173277  |
| 29 | 6 | 0 | -6.565662 | -1.995149 | -0.127689 |
| 30 | 6 | 0 | -2.264117 | 1.570824  | 0.110963  |
| 31 | 6 | 0 | -3.177126 | 2.308014  | -0.863354 |
| 32 | 6 | 0 | -4.182757 | 3.205856  | -0.132490 |
| 33 | 1 | 0 | -4.761362 | 3.780327  | -0.862219 |
| 34 | 1 | 0 | -4.869340 | 2.621658  | 0.485014  |
| 35 | 1 | 0 | -3.657044 | 3.913115  | 0.514475  |
| 36 | 6 | 0 | -3.854256 | 1.375119  | -1.893301 |
| 37 | 1 | 0 | -4.277498 | 2.019485  | -2.671590 |
| 38 | 1 | 0 | -3.057375 | 0.787731  | -2.367954 |
| 39 | 6 | 0 | -4.947723 | 0.415367  | -1.392671 |
| 40 | 1 | 0 | -5.879512 | 0.965801  | -1.218869 |
| 41 | 1 | 0 | -5.159620 | -0.304767 | -2.191679 |
| 42 | 6 | 0 | -1.093522 | 2.289211  | 0.773395  |
| 43 | 1 | 0 | -1.218026 | 3.365827  | 0.895463  |
| 44 | 6 | 0 | 0.207133  | 1.912477  | 0.000704  |
| 45 | 1 | 0 | 1.061330  | 2.473796  | 0.390608  |
| 46 | 1 | 0 | 0.127470  | 2.145688  | -1.063014 |
| 47 | 6 | 0 | -0.736151 | -1.162142 | 2.138731  |
| 48 | 1 | 0 | -1.614423 | -1.284150 | 2.774628  |
| 49 | 1 | 0 | 0.139932  | -1.081122 | 2.790082  |
| 50 | 1 | 0 | -0.645399 | -2.076781 | 1.547400  |
| 51 | 6 | 0 | -0.928908 | 1.434124  | 2.036026  |
| 52 | 1 | 0 | -1.794192 | 1.479935  | 2.703017  |
| 53 | 1 | 0 | -0.023521 | 1.659162  | 2.607136  |
| 54 | 6 | 0 | 0.333935  | -0.382456 | -1.050576 |
| 55 | 6 | 0 | 4.977001  | -0.265486 | 0.214642  |
| 56 | 6 | 0 | 4.969187  | 0.206799  | 1.479152  |
| 57 | 6 | 0 | 6.124087  | 0.954426  | 2.091466  |
| 58 | 1 | 0 | 6.474583  | 0.421533  | 2.985495  |
| 59 | 1 | 0 | 5.784388  | 1.939831  | 2.438180  |
| 60 | 1 | 0 | 6.950595  | 1.080402  | 1.396000  |
| 61 | 6 | 0 | 3.775630  | 0.009501  | 2.398671  |
| 62 | 1 | 0 | 4.033185  | 0.399836  | 3.388251  |
| 63 | 1 | 0 | 3.586772  | -1.064731 | 2.536148  |
| 64 | 6 | 0 | 2.464384  | 0.687685  | 1.936090  |
| 65 | 1 | 0 | 1.793821  | 0.725396  | 2.799514  |
| 66 | 1 | 0 | 2.674157  | 1.726141  | 1.654690  |

|    |   |   |           |           |           |
|----|---|---|-----------|-----------|-----------|
| 67 | 6 | 0 | 6.088955  | -0.132278 | -0.788194 |
| 68 | 8 | 0 | 7.164246  | 0.442070  | -0.658390 |
| 69 | 6 | 0 | 5.644853  | -0.858991 | -1.990837 |
| 70 | 6 | 0 | -4.377620 | -2.511572 | 0.913275  |

-----

Rotational constants (GHZ):      0.2278833      0.0616838      0.0594514

Standard orientation of **11**

| Center<br>Number | Atomic<br>Number | Atomic<br>Type | Coordinates (Angstroms) |           |           |
|------------------|------------------|----------------|-------------------------|-----------|-----------|
|                  |                  |                | X                       | Y         | Z         |
| 1                | 6                | 0              | 3.151954                | -2.196678 | 0.978997  |
| 2                | 6                | 0              | 4.002120                | -1.450513 | 0.017980  |
| 3                | 6                | 0              | -3.263378               | -1.502090 | 1.853713  |
| 4                | 6                | 0              | 3.450194                | -3.656893 | 1.269107  |
| 5                | 6                | 0              | -3.821526               | -1.903172 | -1.979967 |
| 6                | 6                | 0              | -3.038757               | -1.656653 | -0.711126 |
| 7                | 6                | 0              | -2.382505               | -0.297316 | -1.054973 |
| 8                | 6                | 0              | -4.104519               | -0.569684 | -2.593122 |
| 9                | 6                | 0              | -1.951769               | 0.686772  | -0.010006 |
| 10               | 6                | 0              | -3.978165               | -1.664569 | 0.509900  |
| 11               | 6                | 0              | -4.277694               | 0.659978  | 2.706618  |
| 12               | 6                | 0              | 2.627041                | 0.675919  | 0.011286  |
| 13               | 6                | 0              | -2.977561               | -0.064376 | 2.307914  |
| 14               | 6                | 0              | 3.588812                | -0.199145 | -0.786140 |
| 15               | 6                | 0              | 5.256995                | -1.977075 | -0.682557 |
| 16               | 6                | 0              | 5.832797                | -0.700046 | -1.246889 |
| 17               | 1                | 0              | 6.848877                | -0.632662 | -1.623768 |
| 18               | 6                | 0              | 4.952287                | 0.309824  | -1.268376 |
| 19               | 1                | 0              | -4.823003               | -3.020254 | -3.442666 |
| 20               | 6                | 0              | 5.192404                | 1.682938  | -1.817665 |
| 21               | 1                | 0              | -4.031793               | -4.012417 | -2.081280 |
| 22               | 6                | 0              | 1.442309                | 2.636802  | -0.103775 |
| 23               | 6                | 0              | -1.014621               | 1.863370  | -0.397145 |
| 24               | 6                | 0              | -1.544682               | 2.935360  | 0.585775  |
| 25               | 6                | 0              | -0.966430               | 2.259658  | -1.869205 |
| 26               | 6                | 0              | -2.205191               | 0.785479  | 1.313340  |
| 27               | 6                | 0              | -4.244499               | -3.043984 | -2.524137 |
| 28               | 6                | 0              | -1.445627               | 2.015028  | 1.810350  |
| 29               | 6                | 0              | 0.072720                | 1.647086  | 1.804912  |
| 30               | 6                | 0              | 0.407042                | 1.549836  | 0.274094  |
| 31               | 6                | 0              | 1.160628                | 0.279592  | -0.202664 |
| 32               | 6                | 0              | 0.801393                | -1.132244 | 0.324432  |
| 33               | 6                | 0              | 1.723449                | -1.774490 | 1.379198  |
| 34               | 1                | 0              | -2.308889               | -2.041885 | 1.837449  |
| 35               | 1                | 0              | 0.654368                | 2.435497  | 2.292080  |
| 36               | 1                | 0              | 0.257923                | 0.712636  | 2.338959  |
| 37               | 1                | 0              | 3.051636                | -0.538312 | -1.688428 |
| 38               | 1                | 0              | 4.486738                | -3.914569 | 1.048009  |
| 39               | 1                | 0              | 3.263344                | -3.873760 | 2.326679  |
| 40               | 1                | 0              | 1.206281                | -2.671437 | 1.738041  |
| 41               | 1                | 0              | 0.747672                | -1.814340 | -0.533103 |
| 42               | 1                | 0              | -0.204783               | -1.107884 | 0.748772  |
| 43               | 1                | 0              | 1.820978                | -1.121632 | 2.253732  |
| 44               | 1                | 0              | 5.920608                | -2.479077 | 0.027218  |

|    |   |   |           |           |           |
|----|---|---|-----------|-----------|-----------|
| 45 | 1 | 0 | 5.011806  | -2.698813 | -1.477268 |
| 46 | 1 | 0 | 2.796061  | -4.305627 | 0.675532  |
| 47 | 1 | 0 | 2.908434  | 0.629495  | 1.067694  |
| 48 | 1 | 0 | 5.055039  | 2.453122  | -1.053491 |
| 49 | 1 | 0 | 6.206010  | 1.762738  | -2.221029 |
| 50 | 1 | 0 | 4.481587  | 1.921136  | -2.618056 |
| 51 | 1 | 0 | 1.030805  | 0.260139  | -1.293970 |
| 52 | 1 | 0 | -2.574621 | 3.219395  | 0.350519  |
| 53 | 1 | 0 | -0.908257 | 3.820476  | 0.635595  |
| 54 | 1 | 0 | -0.530169 | 1.476261  | -2.499786 |
| 55 | 1 | 0 | -2.259442 | -2.411298 | -0.557752 |
| 56 | 1 | 0 | -0.366721 | 3.163560  | -1.995500 |
| 57 | 1 | 0 | -1.972535 | 2.451409  | -2.247112 |
| 58 | 1 | 0 | -1.783771 | 2.428033  | 2.764783  |
| 59 | 1 | 0 | -1.515513 | -0.511307 | -1.694662 |
| 60 | 1 | 0 | -2.130689 | 0.584382  | 3.966130  |
| 61 | 1 | 0 | -3.858252 | -1.966198 | 2.647653  |
| 62 | 1 | 0 | -4.501260 | -2.627155 | 0.500586  |
| 63 | 1 | 0 | -4.756123 | -0.902913 | 0.380978  |
| 64 | 1 | 0 | -4.780875 | 0.100851  | 3.501633  |
| 65 | 1 | 0 | -4.067504 | 1.669629  | 3.075971  |
| 66 | 1 | 0 | -4.960426 | 0.761978  | 1.858994  |
| 67 | 8 | 0 | -3.360746 | 0.366173  | -1.933201 |
| 68 | 8 | 0 | 4.172549  | -1.274294 | 1.436051  |
| 69 | 8 | 0 | 2.653540  | 2.072980  | -0.366473 |
| 70 | 8 | 0 | -4.852300 | -0.293110 | -3.498340 |
| 71 | 8 | 0 | -2.159870 | -0.252523 | 3.483862  |
| 72 | 8 | 0 | 1.286217  | 3.831839  | -0.172942 |

-----  
Rotational constants (GHZ):      0.1720780      0.0768173      0.0740032

Standard orientation of **14**

| Center<br>Number | Atomic<br>Number | Atomic<br>Type | Coordinates (Angstroms) |           |           |
|------------------|------------------|----------------|-------------------------|-----------|-----------|
|                  |                  |                | X                       | Y         | Z         |
| 1                | 6                | 0              | -4.930597               | 1.498055  | 0.253955  |
| 2                | 6                | 0              | 3.450688                | 0.936986  | -0.820010 |
| 3                | 6                | 0              | 4.567758                | 0.217074  | -0.027528 |
| 4                | 6                | 0              | 5.765873                | 1.168900  | 0.048290  |
| 5                | 6                | 0              | -5.502354               | 0.428076  | -0.624121 |
| 6                | 6                | 0              | -2.531190               | 2.000089  | 1.102409  |
| 7                | 6                | 0              | -1.244521               | 1.474210  | 1.811818  |
| 8                | 6                | 0              | -0.971356               | -0.039802 | 1.996522  |
| 9                | 6                | 0              | -0.971581               | -0.923593 | 0.698501  |
| 10               | 6                | 0              | 2.165416                | -1.974103 | -0.011741 |
| 11               | 6                | 0              | 3.625406                | -2.196815 | -0.445165 |
| 12               | 6                | 0              | -3.610195               | 0.973207  | 0.758698  |
| 13               | 6                | 0              | 4.665659                | -1.244669 | 0.148121  |
| 14               | 6                | 0              | -0.095219               | 0.925623  | -1.067153 |
| 15               | 6                | 0              | 3.907478                | 2.399430  | -0.787657 |
| 16               | 6                | 0              | 3.097386                | 3.545351  | -1.319508 |
| 17               | 6                | 0              | 5.163650                | 2.490706  | -0.333128 |
| 18               | 6                | 0              | 6.016689                | -1.889859 | 0.388358  |
| 19               | 6                | 0              | -0.630881               | -2.399102 | 0.965258  |
| 20               | 6                | 0              | -1.170747               | -3.147530 | -0.002216 |



|    |   |   |           |           |           |
|----|---|---|-----------|-----------|-----------|
| 21 | 6 | 0 | -2.927624 | -2.902539 | -1.874181 |
| 22 | 6 | 0 | 0.316585  | -0.187308 | 2.833899  |
| 23 | 6 | 0 | -3.238173 | 0.002841  | -0.381785 |
| 24 | 6 | 0 | -5.563958 | 2.651075  | 0.466073  |
| 25 | 6 | 0 | -2.401864 | -1.178108 | 0.074631  |
| 26 | 6 | 0 | -1.909883 | -2.229107 | -0.961883 |
| 27 | 6 | 0 | -0.798378 | -1.429778 | -1.712664 |
| 28 | 6 | 0 | -0.068430 | -0.558780 | -0.635393 |
| 29 | 6 | 0 | 1.493855  | -0.758789 | -0.656135 |
| 30 | 6 | 0 | 2.059889  | 0.614114  | -0.257141 |
| 31 | 1 | 0 | 6.566417  | 0.875033  | -0.646916 |
| 32 | 1 | 0 | 2.204264  | 3.732206  | -0.717632 |
| 33 | 1 | 0 | 3.700545  | 4.457473  | -1.344011 |
| 34 | 1 | 0 | 2.739311  | 3.340389  | -2.335201 |
| 35 | 1 | 0 | 6.196271  | 1.155101  | 1.055861  |
| 36 | 1 | 0 | 5.722814  | 3.420493  | -0.283860 |
| 37 | 1 | 0 | 6.418147  | -2.296142 | -0.547021 |
| 38 | 1 | 0 | 5.913498  | -2.720797 | 1.094502  |
| 39 | 1 | 0 | 6.740203  | -1.183556 | 0.797385  |
| 40 | 1 | 0 | 2.128296  | -1.911493 | 1.078847  |
| 41 | 1 | 0 | 1.710463  | -0.838196 | -1.733826 |
| 42 | 1 | 0 | -2.786604 | 0.550624  | -1.207967 |
| 43 | 1 | 0 | -1.051600 | -4.216955 | -0.148005 |
| 44 | 1 | 0 | 0.026412  | -2.746688 | 1.752006  |
| 45 | 1 | 0 | -3.694067 | -3.420566 | -1.290151 |
| 46 | 1 | 0 | -3.438213 | -2.177009 | -2.511058 |
| 47 | 1 | 0 | -2.435050 | -3.641012 | -2.517745 |
| 48 | 1 | 0 | 0.214399  | 0.412978  | 3.741362  |
| 49 | 1 | 0 | 0.467207  | -1.223494 | 3.150065  |
| 50 | 1 | 0 | 1.221241  | 0.131993  | 2.317148  |
| 51 | 1 | 0 | -0.368383 | 1.916685  | 1.328825  |
| 52 | 1 | 0 | -0.101632 | -2.103028 | -2.222053 |
| 53 | 1 | 0 | -1.242415 | 1.866382  | 2.833408  |
| 54 | 1 | 0 | -2.980457 | 2.749262  | 1.763356  |
| 55 | 1 | 0 | -2.253538 | 2.527914  | 0.186267  |
| 56 | 1 | 0 | -3.815743 | 0.364883  | 1.648511  |
| 57 | 1 | 0 | -5.149465 | 3.436703  | 1.089838  |
| 58 | 1 | 0 | -6.530940 | 2.825850  | 0.004391  |
| 59 | 1 | 0 | -1.915266 | -1.454822 | 2.988017  |
| 60 | 1 | 0 | -1.249640 | -0.784744 | -2.472459 |
| 61 | 1 | 0 | 1.604353  | -2.866005 | -0.299068 |
| 62 | 1 | 0 | 3.704169  | -2.177100 | -1.541448 |
| 63 | 1 | 0 | 3.903137  | -3.215118 | -0.147374 |
| 64 | 1 | 0 | 3.466919  | 0.599727  | -1.870083 |
| 65 | 1 | 0 | 2.082728  | 0.760237  | 0.822767  |
| 66 | 8 | 0 | -2.048623 | -0.507950 | 2.837485  |
| 67 | 8 | 0 | -6.617534 | 0.328678  | -1.074611 |
| 68 | 8 | 0 | -4.527221 | -0.500932 | -0.858521 |
| 69 | 8 | 0 | 1.086079  | 1.536386  | -0.804040 |
| 70 | 8 | 0 | -0.972441 | 1.538212  | -1.630339 |
| 71 | 8 | 0 | 4.193141  | -0.400916 | 1.227158  |
| 72 | 1 | 0 | -3.001269 | -1.690148 | 0.831526  |

---

Rotational constants (GHZ):      0.2357324      0.0755597      0.0685804

Standard orientation of **15**

| Center Number | Atomic Number | Atomic Type | Coordinates (Angstroms) |           |           |
|---------------|---------------|-------------|-------------------------|-----------|-----------|
|               |               |             | X                       | Y         | Z         |
| 1             | 6             | 0           | 4.934459                | -0.013061 | -0.386443 |
| 2             | 6             | 0           | 4.022210                | -0.509452 | 0.761988  |
| 3             | 6             | 0           | 2.556921                | -0.614369 | 0.327406  |
| 4             | 6             | 0           | 1.808991                | 0.727279  | 0.234131  |
| 5             | 6             | 0           | 2.178080                | 1.608493  | -0.959406 |
| 6             | 6             | 0           | 3.594414                | 2.203772  | -0.887930 |
| 7             | 6             | 0           | 4.755058                | 1.240069  | -1.147903 |
| 8             | 6             | 0           | 6.283517                | -0.724197 | -0.231173 |
| 9             | 6             | 0           | 5.949836                | -1.872063 | 0.678067  |
| 10            | 6             | 0           | 4.724715                | -1.794798 | 1.212149  |
| 11            | 6             | 0           | 4.155628                | -2.760234 | 2.210014  |
| 12            | 8             | 0           | 4.387896                | -0.035702 | -1.726156 |
| 13            | 8             | 0           | 1.797375                | -1.349281 | 1.324870  |
| 14            | 6             | 0           | 0.542889                | -0.851262 | 1.454332  |
| 15            | 6             | 0           | 0.326953                | 0.328575  | 0.490347  |
| 16            | 8             | 0           | -0.237113               | -1.320128 | 2.250038  |
| 17            | 6             | 0           | -0.611768               | -0.148257 | -0.737986 |
| 18            | 6             | 0           | -1.996611               | -0.092401 | 0.004402  |
| 19            | 6             | 0           | -1.891004               | 1.434656  | 0.335353  |
| 20            | 6             | 0           | -1.497442               | 1.982861  | -1.035589 |
| 21            | 6             | 0           | -0.753005               | 1.061615  | -1.654273 |
| 22            | 6             | 0           | -3.241499               | -0.488049 | -0.781289 |
| 23            | 6             | 0           | -4.532300               | -0.428413 | 0.069886  |
| 24            | 6             | 0           | -5.237514               | 0.936000  | 0.136980  |
| 25            | 6             | 0           | -4.333653               | 2.184536  | 0.109599  |
| 26            | 6             | 0           | -3.068484               | 2.203802  | 0.997758  |
| 27            | 1             | 0           | 4.063490                | 0.209477  | 1.597698  |
| 28            | 6             | 0           | -0.205439               | -1.448508 | -1.426909 |
| 29            | 8             | 0           | -3.141890               | -1.878352 | -1.203221 |
| 30            | 6             | 0           | -4.360919               | -2.495291 | -1.162096 |
| 31            | 6             | 0           | -5.331008               | -1.574285 | -0.495364 |
| 32            | 8             | 0           | -2.714114               | 3.604926  | 1.016044  |
| 33            | 6             | 0           | -3.379154               | 1.768051  | 2.437874  |
| 34            | 8             | 0           | -4.546056               | -3.600051 | -1.608381 |
| 35            | 6             | 0           | -6.640917               | -1.819984 | -0.475237 |
| 36            | 6             | 0           | -0.550256               | 1.429044  | 1.156279  |
| 37            | 6             | 0           | 5.956174                | 1.910065  | -1.789075 |
| 38            | 1             | 0           | -1.966328               | -0.704069 | 0.910498  |
| 39            | 1             | 0           | 2.500445                | -1.172242 | -0.609785 |
| 40            | 1             | 0           | 2.098920                | 1.287916  | 1.138690  |
| 41            | 1             | 0           | 1.472428                | 2.443020  | -1.005336 |
| 42            | 1             | 0           | 2.074649                | 1.054007  | -1.896486 |
| 43            | 1             | 0           | 3.657520                | 3.000183  | -1.639326 |
| 44            | 1             | 0           | 3.749902                | 2.697590  | 0.081842  |
| 45            | 1             | 0           | 6.660526                | -1.036584 | -1.211199 |
| 46            | 1             | 0           | 7.045002                | -0.065263 | 0.212618  |
| 47            | 1             | 0           | 6.660325                | -2.661962 | 0.903687  |
| 48            | 1             | 0           | 4.905142                | -3.508605 | 2.483114  |
| 49            | 1             | 0           | 3.831416                | -2.245366 | 3.121920  |
| 50            | 1             | 0           | 3.271139                | -3.274262 | 1.824398  |
| 51            | 1             | 0           | -1.713040               | 2.994587  | -1.357483 |
| 52            | 1             | 0           | -0.254021               | 1.156621  | -2.612141 |
| 53            | 1             | 0           | -3.344101               | 0.112240  | -1.691592 |

|    |   |   |           |           |           |
|----|---|---|-----------|-----------|-----------|
| 54 | 1 | 0 | -4.236797 | -0.723451 | 1.087098  |
| 55 | 1 | 0 | -5.860600 | 0.952241  | 1.038393  |
| 56 | 1 | 0 | -5.930304 | 1.016635  | -0.708735 |
| 57 | 1 | 0 | -4.021619 | 2.387450  | -0.920154 |
| 58 | 1 | 0 | -4.934268 | 3.047640  | 0.415024  |
| 59 | 1 | 0 | -0.131192 | -2.280957 | -0.721280 |
| 60 | 1 | 0 | -0.945589 | -1.730885 | -2.176705 |
| 61 | 1 | 0 | 0.759028  | -1.337669 | -1.932677 |
| 62 | 1 | 0 | -1.968823 | 3.710100  | 1.622922  |
| 63 | 1 | 0 | -4.254134 | 2.313675  | 2.802875  |
| 64 | 1 | 0 | -3.574636 | 0.696804  | 2.527213  |
| 65 | 1 | 0 | -2.545276 | 1.999133  | 3.108343  |
| 66 | 1 | 0 | -7.351866 | -1.151251 | -0.000353 |
| 67 | 1 | 0 | -7.024389 | -2.720217 | -0.945590 |
| 68 | 1 | 0 | -0.056552 | 2.405682  | 1.116285  |
| 69 | 1 | 0 | -0.726651 | 1.172814  | 2.203792  |
| 70 | 1 | 0 | 6.312427  | 2.735355  | -1.162008 |
| 71 | 1 | 0 | 6.781250  | 1.214190  | -1.945300 |
| 72 | 1 | 0 | 5.674532  | 2.328958  | -2.761183 |

---

Rotational constants (GHZ):                    0.2264118        0.0658249        0.0600325

**Standard orientation of 16**

---

| Center<br>Number | Atomic<br>Number | Atomic<br>Type | Coordinates (Angstroms) |           |           |
|------------------|------------------|----------------|-------------------------|-----------|-----------|
|                  |                  |                | X                       | Y         | Z         |
| 1                | 6                | 0              | -4.316008               | 1.286555  | 0.531675  |
| 2                | 6                | 0              | -4.018922               | 0.111245  | -0.430185 |
| 3                | 6                | 0              | -2.695020               | -0.584606 | -0.095334 |
| 4                | 6                | 0              | -1.417529               | 0.150889  | -0.543301 |
| 5                | 6                | 0              | -1.085742               | 1.440814  | 0.210587  |
| 6                | 6                | 0              | -2.095402               | 2.584411  | 0.008181  |
| 7                | 6                | 0              | -3.433295               | 2.450247  | 0.737353  |
| 8                | 6                | 0              | -5.828686               | 1.309112  | 0.775931  |
| 9                | 6                | 0              | -6.262650               | -0.045833 | 0.294897  |
| 10               | 6                | 0              | -5.300557               | -0.724437 | -0.342539 |
| 11               | 6                | 0              | -5.478215               | -2.062369 | -0.998375 |
| 12               | 8                | 0              | -3.501348               | 1.391168  | 1.724015  |
| 13               | 8                | 0              | -2.610119               | -1.840224 | -0.818170 |
| 14               | 6                | 0              | -1.318645               | -2.122533 | -1.145315 |
| 15               | 6                | 0              | -0.394029               | -1.030781 | -0.580701 |
| 16               | 8                | 0              | -1.043215               | -3.104851 | -1.787762 |
| 17               | 6                | 0              | 0.939905                | -0.834900 | -1.427160 |
| 18               | 6                | 0              | 1.858553                | -0.224743 | -0.314487 |
| 19               | 6                | 0              | 1.731402                | -1.456624 | 0.639738  |
| 20               | 6                | 0              | 2.025593                | -2.587328 | -0.343819 |
| 21               | 6                | 0              | 1.562908                | -2.226021 | -1.543392 |
| 22               | 6                | 0              | 3.277654                | 0.175043  | -0.690636 |
| 23               | 6                | 0              | 4.057295                | 0.790846  | 0.494089  |
| 24               | 6                | 0              | 4.803578                | -0.202791 | 1.391948  |
| 25               | 6                | 0              | 4.073646                | -1.528646 | 1.694270  |
| 26               | 6                | 0              | 2.548542                | -1.472776 | 1.963477  |
| 27               | 1                | 0              | -3.933290               | 0.492819  | -1.461495 |
| 28               | 6                | 0              | 0.762076                | -0.095558 | -2.748751 |
| 29               | 8                | 0              | 3.228726                | 1.230799  | -1.695166 |

|    |   |   |           |           |           |
|----|---|---|-----------|-----------|-----------|
| 30 | 6 | 0 | 4.221808  | 2.148332  | -1.493297 |
| 31 | 6 | 0 | 4.890613  | 1.840007  | -0.192849 |
| 32 | 8 | 0 | 2.314401  | -0.269496 | 2.717699  |
| 33 | 6 | 0 | 2.157092  | -2.684588 | 2.827673  |
| 34 | 8 | 0 | 4.454162  | 3.034887  | -2.277818 |
| 35 | 6 | 0 | 6.019330  | 2.442977  | 0.181248  |
| 36 | 6 | 0 | 0.166725  | -1.462036 | 0.826033  |
| 37 | 6 | 0 | -4.017962 | 3.776711  | 1.182805  |
| 38 | 1 | 0 | 1.402812  | 0.655935  | 0.143703  |
| 39 | 1 | 0 | -2.665945 | -0.807031 | 0.976537  |
| 40 | 1 | 0 | -1.592538 | 0.431046  | -1.592804 |
| 41 | 1 | 0 | -0.124654 | 1.815873  | -0.151604 |
| 42 | 1 | 0 | -0.976726 | 1.253845  | 1.283148  |
| 43 | 1 | 0 | -1.619089 | 3.507511  | 0.359102  |
| 44 | 1 | 0 | -2.283216 | 2.737509  | -1.063742 |
| 45 | 1 | 0 | -6.036609 | 1.486916  | 1.836943  |
| 46 | 1 | 0 | -6.322606 | 2.114569  | 0.212113  |
| 47 | 1 | 0 | -7.278284 | -0.409810 | 0.420204  |
| 48 | 1 | 0 | -6.523525 | -2.379124 | -0.938097 |
| 49 | 1 | 0 | -5.186949 | -2.027778 | -2.054557 |
| 50 | 1 | 0 | -4.851099 | -2.830960 | -0.539105 |
| 51 | 1 | 0 | 2.428691  | -3.556580 | -0.071514 |
| 52 | 1 | 0 | 1.523693  | -2.830592 | -2.439893 |
| 53 | 1 | 0 | 3.824002  | -0.662988 | -1.136608 |
| 54 | 1 | 0 | 3.316609  | 1.304018  | 1.121103  |
| 55 | 1 | 0 | 5.769692  | -0.449381 | 0.935012  |
| 56 | 1 | 0 | 5.025877  | 0.303482  | 2.336296  |
| 57 | 1 | 0 | 4.236991  | -2.233896 | 0.872819  |
| 58 | 1 | 0 | 4.558699  | -1.971746 | 2.570976  |
| 59 | 1 | 0 | 1.703825  | -0.053520 | -3.298912 |
| 60 | 1 | 0 | 0.025365  | -0.612819 | -3.373876 |
| 61 | 1 | 0 | 0.431802  | 0.936781  | -2.606606 |
| 62 | 1 | 0 | 1.435526  | -0.330117 | 3.114291  |
| 63 | 1 | 0 | 2.710972  | -2.652128 | 3.770064  |
| 64 | 1 | 0 | 1.087358  | -2.684877 | 3.062514  |
| 65 | 1 | 0 | 2.384949  | -3.631546 | 2.329522  |
| 66 | 1 | 0 | 6.514604  | 2.217054  | 1.120311  |
| 67 | 1 | 0 | 6.469377  | 3.190101  | -0.465271 |
| 68 | 1 | 0 | -0.138655 | -0.744761 | 1.595223  |
| 69 | 1 | 0 | -0.194842 | -2.446753 | 1.130066  |
| 70 | 1 | 0 | -4.156613 | 4.440813  | 0.322110  |
| 71 | 1 | 0 | -4.979319 | 3.653292  | 1.683131  |
| 72 | 1 | 0 | -3.332101 | 4.272886  | 1.877921  |

-----  
Rotational constants (GHZ):           0.1960840       0.0725629       0.0660643

Standard orientation of **17**

| Center<br>Number | Atomic<br>Number | Atomic<br>Type | Coordinates (Angstroms) |           |           |
|------------------|------------------|----------------|-------------------------|-----------|-----------|
|                  |                  |                | X                       | Y         | Z         |
| 1                | 1                | 0              | -7.299762               | -0.457800 | 0.353688  |
| 2                | 1                | 0              | 6.616581                | 3.057669  | -0.532105 |
| 3                | 1                | 0              | 6.626870                | 2.116168  | 1.072687  |
| 4                | 8                | 0              | 2.179662                | -2.741282 | 2.626028  |
| 5                | 1                | 0              | 2.535806                | -3.464357 | 2.092807  |

|    |   |   |           |           |           |
|----|---|---|-----------|-----------|-----------|
| 6  | 8 | 0 | -1.012503 | -3.065184 | -1.808649 |
| 7  | 8 | 0 | -2.600042 | -1.831043 | -0.835360 |
| 8  | 8 | 0 | -3.564029 | 1.370979  | 1.724158  |
| 9  | 8 | 0 | 3.264054  | 1.243349  | -1.688120 |
| 10 | 8 | 0 | 4.566608  | 2.977429  | -2.318393 |
| 11 | 6 | 0 | -5.460463 | -2.088629 | -1.040279 |
| 12 | 1 | 0 | -6.503249 | -2.416393 | -0.997346 |
| 13 | 1 | 0 | -4.833025 | -2.851181 | -0.571395 |
| 14 | 1 | 0 | -5.151979 | -2.049678 | -2.091354 |
| 15 | 6 | 0 | -5.307524 | -0.749950 | -0.379934 |
| 16 | 6 | 0 | -4.033801 | 0.099962  | -0.446323 |
| 17 | 1 | 0 | -3.939888 | 0.488246  | -1.474517 |
| 18 | 6 | 0 | -2.706656 | -0.584279 | -0.100480 |
| 19 | 1 | 0 | -2.686666 | -0.817282 | 0.969198  |
| 20 | 6 | 0 | -1.433033 | 0.170557  | -0.526811 |
| 21 | 1 | 0 | -1.601560 | 0.465628  | -1.573321 |
| 22 | 6 | 0 | -0.395982 | -0.999072 | -0.570368 |
| 23 | 6 | 0 | 0.939427  | -0.779354 | -1.411268 |
| 24 | 6 | 0 | 1.860648  | -0.176158 | -0.293299 |
| 25 | 6 | 0 | 3.287543  | 0.197066  | -0.673326 |
| 26 | 1 | 0 | 3.815984  | -0.657523 | -1.107786 |
| 27 | 6 | 0 | 4.089440  | 0.809817  | 0.497799  |
| 28 | 1 | 0 | 3.368586  | 1.400531  | 1.081993  |
| 29 | 6 | 0 | 4.971125  | 1.800908  | -0.217634 |
| 30 | 6 | 0 | 6.133990  | 2.349236  | 0.134138  |
| 31 | 1 | 0 | 1.532791  | -2.764187 | -2.439171 |
| 32 | 1 | 0 | 1.410243  | 0.714827  | 0.153405  |
| 33 | 1 | 0 | 2.424153  | -3.509439 | -0.085031 |
| 34 | 6 | 0 | 1.722136  | -1.411352 | 0.657138  |
| 35 | 6 | 0 | 2.525841  | -1.495647 | 1.985409  |
| 36 | 6 | 0 | 2.132763  | -0.443255 | 3.028714  |
| 37 | 1 | 0 | 2.816599  | -0.496409 | 3.880732  |
| 38 | 1 | 0 | 1.127748  | -0.645957 | 3.404281  |
| 39 | 1 | 0 | 2.154251  | 0.573465  | 2.630536  |
| 40 | 6 | 0 | 4.055178  | -1.508489 | 1.729624  |
| 41 | 1 | 0 | 4.508308  | -1.954154 | 2.622072  |
| 42 | 1 | 0 | 4.251791  | -2.206208 | 0.905930  |
| 43 | 6 | 0 | 4.788321  | -0.179732 | 1.442424  |
| 44 | 1 | 0 | 4.984684  | 0.339262  | 2.387360  |
| 45 | 1 | 0 | 5.771564  | -0.428967 | 1.026658  |
| 46 | 6 | 0 | 2.027081  | -2.532202 | -0.340196 |
| 47 | 6 | 0 | 0.160799  | -1.433833 | 0.835632  |
| 48 | 1 | 0 | -0.155235 | -0.727626 | 1.606740  |
| 49 | 1 | 0 | -0.173077 | -2.425049 | 1.146819  |
| 50 | 6 | 0 | 0.758562  | -0.026613 | -2.724833 |
| 51 | 1 | 0 | 1.699069  | 0.027146  | -3.275951 |
| 52 | 1 | 0 | 0.420474  | 1.001604  | -2.570665 |
| 53 | 1 | 0 | 0.023977  | -0.541482 | -3.354227 |
| 54 | 6 | 0 | 1.569203  | -2.165446 | -1.538975 |
| 55 | 6 | 0 | -1.303524 | -2.094231 | -1.155225 |
| 56 | 6 | 0 | -4.356320 | 1.266723  | 0.516991  |
| 57 | 6 | 0 | -3.488461 | 2.437157  | 0.746953  |
| 58 | 6 | 0 | -4.094471 | 3.755023  | 1.190094  |
| 59 | 1 | 0 | -4.220319 | 4.424935  | 0.331895  |
| 60 | 1 | 0 | -3.428332 | 4.251204  | 1.904132  |
| 61 | 1 | 0 | -5.065320 | 3.619397  | 1.668375  |
| 62 | 6 | 0 | -2.137174 | 2.591208  | 0.046291  |

|    |   |   |           |           |           |
|----|---|---|-----------|-----------|-----------|
| 63 | 1 | 0 | -1.675287 | 3.512633  | 0.420564  |
| 64 | 1 | 0 | -2.304718 | 2.759027  | -1.026825 |
| 65 | 6 | 0 | -1.123790 | 1.451354  | 0.252377  |
| 66 | 1 | 0 | -0.158369 | 1.838342  | -0.085919 |
| 67 | 1 | 0 | -1.035403 | 1.248204  | 1.323780  |
| 68 | 6 | 0 | -5.873233 | 1.274875  | 0.735425  |
| 69 | 1 | 0 | -6.100847 | 1.447965  | 1.793151  |
| 70 | 1 | 0 | -6.364729 | 2.077227  | 0.164982  |
| 71 | 6 | 0 | -6.286264 | -0.082955 | 0.244175  |
| 72 | 6 | 0 | 4.301685  | 2.116684  | -1.516482 |

---

Rotational constants (GHZ):            0.1961734    0.0715228    0.0654377

Standard orientation of **18**

---

| Center<br>Number | Atomic<br>Number | Atomic<br>Type | Coordinates (Angstroms) |           |           |
|------------------|------------------|----------------|-------------------------|-----------|-----------|
|                  |                  |                | X                       | Y         | Z         |
| 1                | 1                | 0              | -7.022227               | -0.495150 | 0.783598  |
| 2                | 1                | 0              | 6.519152                | 3.103750  | -0.596709 |
| 3                | 1                | 0              | 6.476395                | 2.323554  | 1.091704  |
| 4                | 8                | 0              | 2.044349                | 0.034510  | 2.687203  |
| 5                | 1                | 0              | 2.361004                | 0.078773  | 3.599605  |
| 6                | 8                | 0              | -1.014038               | -3.249929 | -1.557579 |
| 7                | 8                | 0              | -2.592155               | -1.857347 | -0.799570 |
| 8                | 8                | 0              | 3.324852                | 1.028121  | -1.753268 |
| 9                | 8                | 0              | 4.596353                | 2.747314  | -2.478058 |
| 10               | 6                | 0              | -5.515692               | -1.912828 | -1.222297 |
| 11               | 1                | 0              | -6.528970               | -2.275557 | -1.032690 |
| 12               | 1                | 0              | -4.798672               | -2.702230 | -0.982562 |
| 13               | 1                | 0              | -5.409225               | -1.720988 | -2.297084 |
| 14               | 6                | 0              | -5.237633               | -0.670175 | -0.437264 |
| 15               | 6                | 0              | -3.976266               | 0.172464  | -0.629720 |
| 16               | 1                | 0              | -3.887915               | 0.448081  | -1.691930 |
| 17               | 6                | 0              | -2.671019               | -0.532454 | -0.215265 |
| 18               | 1                | 0              | -2.675161               | -0.648911 | 0.876445  |
| 19               | 6                | 0              | -1.366039               | 0.126570  | -0.695879 |
| 20               | 1                | 0              | -1.501577               | 0.284857  | -1.776096 |
| 21               | 6                | 0              | -0.368593               | -1.067407 | -0.558001 |
| 22               | 6                | 0              | 1.002304                | -0.981048 | -1.362182 |
| 23               | 6                | 0              | 1.874079                | -0.252461 | -0.283452 |
| 24               | 6                | 0              | 3.313364                | 0.096470  | -0.632752 |
| 25               | 1                | 0              | 3.875076                | -0.789268 | -0.948393 |
| 26               | 6                | 0              | 4.035946                | 0.844628  | 0.511355  |
| 27               | 1                | 0              | 3.265976                | 1.430314  | 1.030070  |
| 28               | 6                | 0              | 4.914696                | 1.802688  | -0.248690 |
| 29               | 6                | 0              | 6.029697                | 2.439817  | 0.109204  |
| 30               | 1                | 0              | 1.606267                | -3.083136 | -2.114257 |
| 31               | 1                | 0              | 1.401548                | 0.674259  | 0.048510  |
| 32               | 1                | 0              | 2.407494                | -3.537023 | 0.357015  |
| 33               | 6                | 0              | 1.690672                | -1.370257 | 0.793525  |
| 34               | 6                | 0              | 2.434904                | -1.242466 | 2.145992  |
| 35               | 6                | 0              | 1.989160                | -2.349497 | 3.118042  |
| 36               | 1                | 0              | 2.495423                | -2.224380 | 4.082800  |
| 37               | 1                | 0              | 0.912165                | -2.311590 | 3.295031  |
| 38               | 1                | 0              | 2.244829                | -3.346366 | 2.746590  |

|    |   |   |           |           |           |
|----|---|---|-----------|-----------|-----------|
| 39 | 6 | 0 | 3.977317  | -1.325877 | 1.965766  |
| 40 | 1 | 0 | 4.419327  | -1.675535 | 2.907383  |
| 41 | 1 | 0 | 4.185057  | -2.116626 | 1.236878  |
| 42 | 6 | 0 | 4.724607  | -0.037819 | 1.559838  |
| 43 | 1 | 0 | 4.895134  | 0.576812  | 2.450695  |
| 44 | 1 | 0 | 5.717883  | -0.327317 | 1.196428  |
| 45 | 6 | 0 | 2.025616  | -2.603389 | -0.041048 |
| 46 | 6 | 0 | 0.121389  | -1.349014 | 0.910582  |
| 47 | 1 | 0 | -0.188864 | -0.559352 | 1.598858  |
| 48 | 1 | 0 | -0.257940 | -2.298971 | 1.293861  |
| 49 | 6 | 0 | 0.892681  | -0.394858 | -2.765392 |
| 50 | 1 | 0 | 1.858148  | -0.424546 | -3.273697 |
| 51 | 1 | 0 | 0.571429  | 0.650010  | -2.756410 |
| 52 | 1 | 0 | 0.177060  | -0.973449 | -3.360485 |
| 53 | 6 | 0 | 1.614787  | -2.379674 | -1.292092 |
| 54 | 6 | 0 | -1.291374 | -2.197805 | -1.040026 |
| 55 | 6 | 0 | -4.223517 | 1.388384  | 0.260675  |
| 56 | 6 | 0 | -3.409131 | 2.458810  | 0.372843  |
| 57 | 6 | 0 | -3.694486 | 3.627694  | 1.277582  |
| 58 | 1 | 0 | -3.751231 | 4.549184  | 0.682788  |
| 59 | 1 | 0 | -2.857789 | 3.767217  | 1.975535  |
| 60 | 1 | 0 | -4.617421 | 3.499661  | 1.838557  |
| 61 | 6 | 0 | -2.122992 | 2.561891  | -0.427194 |
| 62 | 1 | 0 | -1.686432 | 3.551589  | -0.260106 |
| 63 | 1 | 0 | -2.348626 | 2.507575  | -1.501658 |
| 64 | 6 | 0 | -1.051933 | 1.497540  | -0.092689 |
| 65 | 1 | 0 | -0.104906 | 1.854148  | -0.508734 |
| 66 | 1 | 0 | -0.917955 | 1.440777  | 0.993774  |
| 67 | 6 | 0 | -5.518288 | 1.160445  | 0.987511  |
| 68 | 8 | 0 | -6.052209 | 1.873540  | 1.830200  |
| 69 | 6 | 0 | -6.058340 | -0.109848 | 0.470763  |
| 70 | 6 | 0 | 4.315468  | 1.959502  | -1.609190 |

-----  
Rotational constants (GHZ):                    0.1952390      0.0700479      0.0651915

Standard orientation of **22**

| Center<br>Number | Atomic<br>Number | Atomic<br>Type | Coordinates (Angstroms) |           |           |
|------------------|------------------|----------------|-------------------------|-----------|-----------|
|                  |                  |                | X                       | Y         | Z         |
| 1                | 6                | 0              | -3.761560               | 1.113056  | 0.061102  |
| 2                | 6                | 0              | -3.126092               | -0.091471 | -0.676619 |
| 3                | 6                | 0              | -2.202553               | -0.903383 | 0.235074  |
| 4                | 6                | 0              | -0.817600               | -0.269989 | 0.473651  |
| 5                | 6                | 0              | -0.881916               | 0.843496  | 1.529635  |
| 6                | 6                | 0              | -1.521972               | 2.148149  | 1.027256  |
| 7                | 6                | 0              | -3.038266               | 2.147051  | 0.830250  |
| 8                | 6                | 0              | -5.142243               | 1.335019  | -0.567483 |
| 9                | 6                | 0              | -5.416663               | 0.017227  | -1.234191 |
| 10               | 6                | 0              | -4.349393               | -0.789368 | -1.283055 |
| 11               | 6                | 0              | -4.310320               | -2.128393 | -1.959432 |
| 12               | 8                | 0              | -3.759365               | 1.084553  | 1.507007  |
| 13               | 6                | 0              | -3.649335               | 3.528667  | 0.981863  |
| 14               | 8                | 0              | -1.912339               | -2.198124 | -0.360574 |
| 15               | 6                | 0              | -0.671029               | -2.604787 | -0.043573 |
| 16               | 6                | 0              | 0.100145                | -1.515034 | 0.711577  |

|    |   |   |           |           |           |
|----|---|---|-----------|-----------|-----------|
| 17 | 8 | 0 | -0.291757 | -3.718994 | -0.351971 |
| 18 | 6 | 0 | 2.298954  | -0.556159 | 2.314588  |
| 19 | 6 | 0 | 2.247296  | -0.234609 | 0.999376  |
| 20 | 6 | 0 | 1.663980  | -1.454495 | 0.250080  |
| 21 | 6 | 0 | 2.242058  | -2.590151 | 1.146368  |
| 22 | 6 | 0 | 1.773486  | -1.971856 | 2.462856  |
| 23 | 6 | 0 | 2.657290  | 1.102061  | 0.467891  |
| 24 | 6 | 0 | 3.802984  | 1.243600  | -0.564491 |
| 25 | 6 | 0 | 3.758906  | 0.297552  | -1.788215 |
| 26 | 6 | 0 | 3.508508  | -1.189891 | -1.526556 |
| 27 | 6 | 0 | 2.050352  | -1.652185 | -1.260512 |
| 28 | 1 | 0 | -2.510386 | 0.285484  | -1.510068 |
| 29 | 6 | 0 | 0.233632  | -1.941437 | 2.223894  |
| 30 | 6 | 0 | 2.683963  | 0.251652  | 3.514662  |
| 31 | 8 | 0 | 1.542790  | 1.824478  | -0.164657 |
| 32 | 6 | 0 | 2.050219  | 2.853994  | -0.912710 |
| 33 | 6 | 0 | 3.530580  | 2.655916  | -1.030424 |
| 34 | 8 | 0 | 2.131039  | -3.050448 | -1.558094 |
| 35 | 6 | 0 | 1.079728  | -1.002163 | -2.263653 |
| 36 | 8 | 0 | 1.351267  | 3.724992  | -1.370215 |
| 37 | 6 | 0 | 4.347951  | 3.604581  | -1.486600 |
| 38 | 1 | 0 | -2.712540 | -1.100931 | 1.183144  |
| 39 | 1 | 0 | -0.500192 | 0.191056  | -0.466042 |
| 40 | 1 | 0 | 0.128554  | 1.087321  | 1.856366  |
| 41 | 1 | 0 | -1.436977 | 0.502406  | 2.409591  |
| 42 | 1 | 0 | -1.301243 | 2.924352  | 1.770981  |
| 43 | 1 | 0 | -1.030800 | 2.480883  | 0.105056  |
| 44 | 1 | 0 | -5.872771 | 1.595433  | 0.205740  |
| 45 | 1 | 0 | -5.131444 | 2.160802  | -1.294850 |
| 46 | 1 | 0 | -6.381417 | -0.227145 | -1.669334 |
| 47 | 1 | 0 | -5.264789 | -2.331400 | -2.453802 |
| 48 | 1 | 0 | -3.515437 | -2.170110 | -2.713440 |
| 49 | 1 | 0 | -4.101876 | -2.938972 | -1.255868 |
| 50 | 1 | 0 | -3.191630 | 4.225422  | 0.270770  |
| 51 | 1 | 0 | -4.727788 | 3.525851  | 0.819199  |
| 52 | 1 | 0 | -3.457530 | 3.910133  | 1.990499  |
| 53 | 1 | 0 | 3.329454  | -2.653685 | 1.064270  |
| 54 | 1 | 0 | 1.804652  | -3.565848 | 0.936230  |
| 55 | 1 | 0 | 2.056554  | -2.478073 | 3.389538  |
| 56 | 1 | 0 | 2.949486  | 1.711626  | 1.329869  |
| 57 | 1 | 0 | 4.763125  | 1.137640  | -0.049500 |
| 58 | 1 | 0 | 4.725784  | 0.407514  | -2.293331 |
| 59 | 1 | 0 | 3.022342  | 0.670574  | -2.506669 |
| 60 | 1 | 0 | 4.154041  | -1.554250 | -0.719397 |
| 61 | 1 | 0 | 3.807478  | -1.743750 | -2.422295 |
| 62 | 1 | 0 | -0.177908 | -2.941120 | 2.393452  |
| 63 | 1 | 0 | -0.284900 | -1.253384 | 2.893409  |
| 64 | 1 | 0 | 2.967090  | 1.281304  | 3.284571  |
| 65 | 1 | 0 | 1.852054  | 0.285985  | 4.229819  |
| 66 | 1 | 0 | 3.524723  | -0.217707 | 4.040815  |
| 67 | 1 | 0 | 1.305315  | -3.476209 | -1.268921 |
| 68 | 1 | 0 | 1.466299  | -1.149042 | -3.276710 |
| 69 | 1 | 0 | 0.097825  | -1.481016 | -2.225806 |
| 70 | 1 | 0 | 0.939925  | 0.068126  | -2.095178 |
| 71 | 1 | 0 | 5.420918  | 3.456418  | -1.559950 |
| 72 | 1 | 0 | 3.944387  | 4.562745  | -1.799791 |



Rotational constants (GHZ):            0.1650413        0.1001960        0.0830411

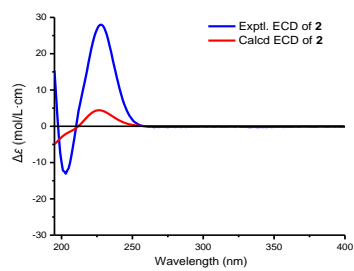

UV shift: -20 nm

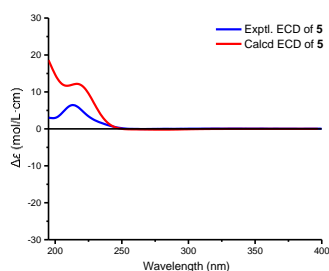

UV shift: -21 nm

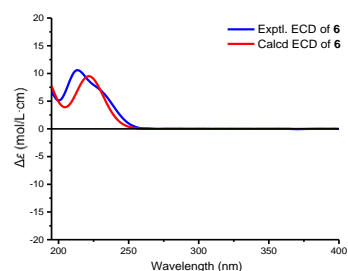

UV shift: -20 nm

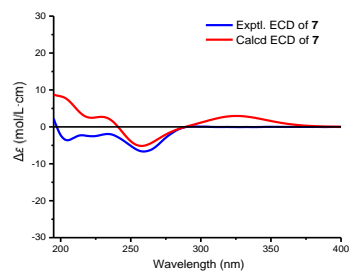

UV shift: -22 nm

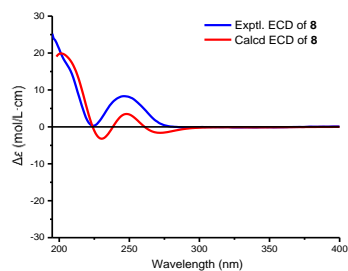

UV shift: -8 nm

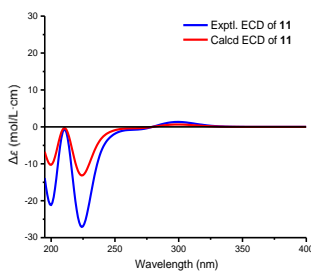

UV shift: +11 nm

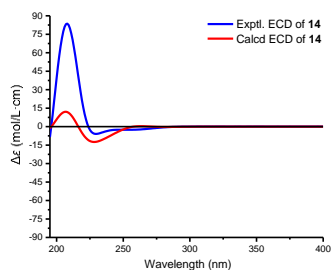

UV shift: +5 nm

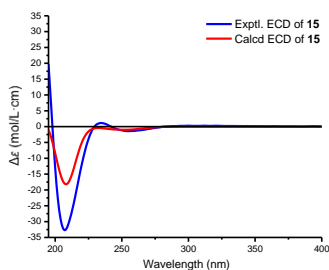

UV shift: -16 nm

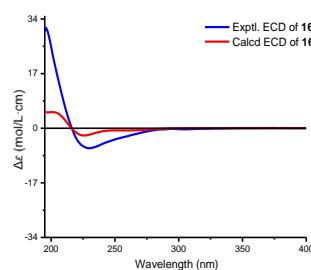

UV shift: -13 nm

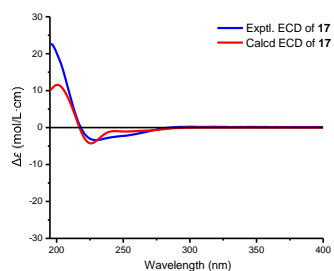

UV shift: -9 nm

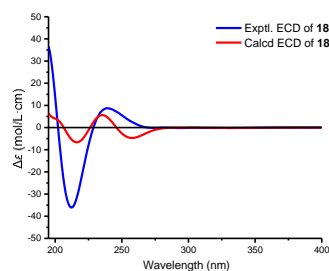

UV shift: -15 nm

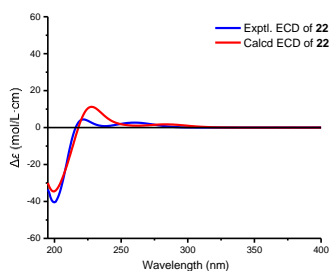

UV shift: -14 nm

Experimental and calculated ECD spectra of compounds **2**, **5–8**, **11**, **14–18**, and **22**.

Rotatory strengths (R) in cgs ( $10^{40}$  erg-esu-cm/Gauss) of **2**.

| State | XX        | YY       | ZZ        | R (length) | R (au)  |
|-------|-----------|----------|-----------|------------|---------|
| 1     | 133.1744  | -4.7022  | -2.6571   | 41.9384    | 0.089   |
| 2     | -44.7385  | -4.6028  | -8.3463   | -19.2292   | -0.0408 |
| 3     | -12.6163  | 3.7286   | -0.4505   | -3.1127    | -0.0066 |
| 4     | 90.9666   | 108.3398 | -29.3177  | 56.6629    | 0.1202  |
| 5     | 8.1266    | -3.7588  | 17.6508   | 7.3395     | 0.0156  |
| 6     | -131.2087 | 34.9946  | -124.1076 | -73.4405   | -0.1558 |
| 7     | -11.0473  | 26.189   | -63.6176  | -16.1586   | -0.0343 |
| 8     | -5.7362   | 10.0705  | -3.1343   | 0.4        | 0.0008  |
| 9     | 0.2111    | -7.4160  | -9.2398   | -5.4816    | -0.0116 |
| 10    | -0.6132   | 11.1866  | -29.7190  | -6.3819    | -0.0135 |
| 11    | 0.9813    | -4.1206  | -1.5223   | -1.5539    | -0.0033 |
| 12    | 0.9118    | 2.3854   | -2.8811   | 0.1387     | 0.0003  |
| 13    | 1.6696    | 4.3161   | 9.2506    | 5.0787     | 0.0108  |
| 14    | 2.3152    | 0.3219   | -9.8309   | -2.3979    | -0.0051 |
| 15    | 93.7993   | -8.4584  | 26.4069   | 37.2492    | 0.079   |
| 16    | 17.7508   | -18.9752 | -9.0330   | -3.4191    | -0.0073 |
| 17    | -1.1431   | -33.9663 | -22.7699  | -19.2931   | -0.0409 |
| 18    | 342.6336  | -14.7336 | -202.0599 | 41.9467    | 0.089   |
| 19    | -1.4178   | -4.1031  | 1.2475    | -1.4245    | -0.0030 |
| 20    | -13.6109  | -2.6106  | -21.2928  | -12.5048   | -0.0265 |
| 21    | 18.8034   | 26.9587  | 1.1054    | 15.6225    | 0.0331  |
| 22    | 18.3259   | -27.7308 | 3.2755    | -2.0431    | -0.0043 |
| 23    | 140.0256  | 25.5552  | -121.6159 | 14.655     | 0.0311  |
| 24    | -4.0388   | -8.4621  | -20.3339  | -10.9450   | -0.0232 |
| 25    | 7.4968    | 39.3862  | -20.4974  | 8.7952     | 0.0187  |
| 26    | 29.2979   | 14.5095  | -3.6208   | 13.3955    | 0.0284  |
| 27    | -0.2347   | -40.6111 | 16.4953   | -8.1169    | -0.0172 |
| 28    | -0.2568   | -5.2275  | 13.4376   | 2.6511     | 0.0056  |
| 29    | 5.8681    | 34.6987  | -11.2362  | 9.7769     | 0.0207  |
| 30    | 36.2426   | -15.7213 | 13.7183   | 11.4132    | 0.0242  |

$1/2[ \langle 0 | \text{del} | b \rangle \langle b | r | 0 \rangle + \langle 0 | r | b \rangle \langle b | \text{del} | 0 \rangle ]$  (Au)

| State | X       | Y       | Z       | Dip. S. | Osc.(frdel) |
|-------|---------|---------|---------|---------|-------------|
| 1     | -0.0603 | -0.0080 | -0.0016 | 0.0699  | 0.0466      |
| 2     | -0.0081 | -0.0023 | -0.0035 | 0.0139  | 0.0093      |
| 3     | -0.0012 | -0.0002 | 0.0000  | 0.0015  | 0.0010      |
| 4     | -0.0302 | -0.0059 | -0.0076 | 0.0436  | 0.0291      |
| 5     | -0.0001 | -0.0002 | -0.0008 | 0.0011  | 0.0007      |
| 6     | -0.1102 | -0.0624 | -0.0159 | 0.1886  | 0.1257      |
| 7     | -0.0076 | -0.0016 | -0.0263 | 0.0354  | 0.0236      |
| 8     | -0.0023 | -0.0006 | -0.0008 | 0.0037  | 0.0025      |
| 9     | -0.0173 | -0.0005 | -0.0007 | 0.0185  | 0.0123      |
| 10    | 0.0000  | -0.0019 | -0.0133 | 0.0152  | 0.0102      |
| 11    | -0.0001 | 0.0000  | -0.0003 | 0.0004  | 0.0002      |
| 12    | -0.0043 | -0.0017 | -0.0038 | 0.0098  | 0.0065      |
| 13    | -0.0010 | -0.0040 | -0.0004 | 0.0054  | 0.0036      |

|    |         |         |         |        |        |
|----|---------|---------|---------|--------|--------|
| 14 | -0.0002 | -0.0054 | -0.0004 | 0.0059 | 0.0040 |
| 15 | -0.0249 | -0.0026 | -0.0051 | 0.0326 | 0.0217 |
| 16 | -0.0036 | -0.0006 | -0.0036 | 0.0078 | 0.0052 |
| 17 | -0.0086 | -0.0020 | -0.0038 | 0.0144 | 0.0096 |
| 18 | -0.1450 | -0.0001 | -0.0337 | 0.1788 | 0.1192 |
| 19 | -0.0007 | -0.0005 | 0.0000  | 0.0013 | 0.0009 |
| 20 | -0.0134 | -0.0001 | -0.0036 | 0.0171 | 0.0114 |
| 21 | -0.0105 | -0.0034 | -0.0026 | 0.0165 | 0.0110 |
| 22 | -0.0093 | -0.0011 | -0.0020 | 0.0124 | 0.0083 |
| 23 | -0.1347 | -0.0006 | -0.0049 | 0.1402 | 0.0934 |
| 24 | -0.0149 | -0.0108 | -0.0013 | 0.0271 | 0.0180 |
| 5  | -0.0196 | -0.0040 | -0.0009 | 0.0245 | 0.0163 |
| 26 | -0.0098 | -0.0050 | -0.0001 | 0.0149 | 0.0099 |
| 27 | 0.0000  | -0.0056 | -0.0040 | 0.0097 | 0.0064 |
| 28 | 0.0000  | -0.0008 | -0.0012 | 0.0019 | 0.0013 |
| 29 | -0.0018 | -0.0134 | -0.0006 | 0.0158 | 0.0106 |
| 30 | -0.0180 | -0.0070 | -0.0006 | 0.0256 | 0.0171 |

Ground to Excited state transition densities written to RWF 633

Excitation energies and oscillator strengths of **2**

Excited state 1: Singlet-A 5.0782 eV 244.15 nm  $f=0.0466$   
 $\langle S^{*2} \rangle = 0.000$

133 -> 134 0.60169  
133 -> 135 0.30588  
133 -> 136 -0.12588

This state for optimization and/or second-order correction.

Copying the Excited state density for this state as the 1-particle RhoCI density.

Excited state 2: Singlet-A 5.3760 eV 230.63 nm  $f=0.0093$   $\langle S^{*2} \rangle = 0.000$

129 -> 135 0.10977  
133 -> 134 -0.28725  
133 -> 135 0.61381  
133 -> 136 0.11315

Excited state 3: Singlet-A 5.5226 eV 224.50 nm  $f=0.0011$   $\langle S^{*2} \rangle = 0.000$

128 -> 134 -0.13914  
130 -> 134 -0.10952  
132 -> 134 0.60053  
132 -> 135 0.26902

Excited state 4: Singlet-A 5.7169 eV 216.87 nm  $f=0.0289$   $\langle S^{*2} \rangle = 0.000$

128 -> 135 -0.22197  
129 -> 134 -0.26780  
129 -> 135 0.43172  
129 -> 136 0.19829  
130 -> 135 -0.10783  
133 -> 134 0.14960  
133 -> 135 -0.10650  
133 -> 136 0.14598

|                   |           |           |           |            |                                  |
|-------------------|-----------|-----------|-----------|------------|----------------------------------|
| Excited state 5:  | Singlet-A | 5.7173 eV | 216.86 nm | $f=0.0008$ | $\langle S^{*2} \rangle = 0.000$ |
| 128 -> 134        | 0.37320   |           |           |            |                                  |
| 128 -> 135        | 0.15022   |           |           |            |                                  |
| 128 -> 136        | -0.11738  |           |           |            |                                  |
| 129 -> 135        | 0.23592   |           |           |            |                                  |
| 130 -> 134        | 0.28553   |           |           |            |                                  |
| 130 -> 135        | 0.13642   |           |           |            |                                  |
| 131 -> 134        | 0.18169   |           |           |            |                                  |
| 131 -> 135        | 0.10585   |           |           |            |                                  |
| 132 -> 134        | 0.22739   |           |           |            |                                  |
| 133 -> 135        | -0.11249  |           |           |            |                                  |
| Excited state 6:  | Singlet-A | 5.7763 eV | 214.64 nm | $f=0.1271$ | $\langle S^{*2} \rangle = 0.000$ |
| 129 -> 135        | -0.18236  |           |           |            |                                  |
| 133 -> 134        | 0.12359   |           |           |            |                                  |
| 133 -> 136        | 0.57220   |           |           |            |                                  |
| 133 -> 137        | -0.25041  |           |           |            |                                  |
| 133 -> 138        | -0.12430  |           |           |            |                                  |
| Excited state 7:  | Singlet-A | 5.8608 eV | 211.55 nm | $f=0.0238$ | $\langle S^{*2} \rangle = 0.000$ |
| 133 -> 136        | 0.28790   |           |           |            |                                  |
| 133 -> 137        | 0.54810   |           |           |            |                                  |
| 133 -> 138        | 0.27860   |           |           |            |                                  |
| Excited state 8:  | Singlet-A | 5.8933 eV | 210.38 nm | $f=0.0025$ | $\langle S^{*2} \rangle = 0.000$ |
| 132 -> 134        | -0.27334  |           |           |            |                                  |
| 132 -> 135        | 0.59479   |           |           |            |                                  |
| 132 -> 136        | -0.21935  |           |           |            |                                  |
| Excited state 9:  | Singlet-A | 5.9390 eV | 208.76 nm | $f=0.0127$ | $\langle S^{*2} \rangle = 0.000$ |
| 132 -> 136        | 0.11233   |           |           |            |                                  |
| 132 -> 137        | 0.54440   |           |           |            |                                  |
| 132 -> 138        | -0.19413  |           |           |            |                                  |
| 132 -> 140        | 0.29509   |           |           |            |                                  |
| 132 -> 142        | -0.13912  |           |           |            |                                  |
| 132 -> 143        | 0.14287   |           |           |            |                                  |
| Excited state 10: | Singlet-A | 6.0709 eV | 204.23 nm | $f=0.0099$ | $\langle S^{*2} \rangle = 0.000$ |
| 133 -> 137        | -0.27469  |           |           |            |                                  |
| 133 -> 138        | 0.52395   |           |           |            |                                  |
| 133 -> 141        | -0.35490  |           |           |            |                                  |
| Excited state 11: | Singlet-A | 6.0988 eV | 203.29 nm | $f=0.0003$ | $\langle S^{*2} \rangle = 0.000$ |
| 132 -> 135        | 0.23468   |           |           |            |                                  |
| 132 -> 136        | 0.63664   |           |           |            |                                  |
| Excited state 12: | Singlet-A | 6.1210 eV | 202.56 nm | $f=0.0065$ | $\langle S^{*2} \rangle = 0.000$ |
| 133 -> 139        | 0.60438   |           |           |            |                                  |
| 133 -> 140        | -0.31549  |           |           |            |                                  |
| 133 -> 143        | 0.12872   |           |           |            |                                  |
| Excited state 13: | Singlet-A | 6.1636 eV | 201.16 nm | $f=0.0035$ | $\langle S^{*2} \rangle = 0.000$ |
| 133 -> 137        | -0.15601  |           |           |            |                                  |
| 133 -> 138        | 0.27180   |           |           |            |                                  |
| 133 -> 139        | -0.12026  |           |           |            |                                  |
| 133 -> 140        | -0.12377  |           |           |            |                                  |

|                   |           |           |           |            |                                  |
|-------------------|-----------|-----------|-----------|------------|----------------------------------|
| 133 -> 141        | 0.57927   |           |           |            |                                  |
| Excited state 14: | Singlet-A | 6.2370 eV | 198.79 nm | $f=0.0040$ | $\langle S^{*2} \rangle = 0.000$ |
| 130 -> 134        | -0.10148  |           |           |            |                                  |
| 133 -> 138        | 0.18136   |           |           |            |                                  |
| 133 -> 139        | 0.26233   |           |           |            |                                  |
| 133 -> 140        | 0.50690   |           |           |            |                                  |
| 133 -> 141        | 0.12870   |           |           |            |                                  |
| 133 -> 142        | 0.28924   |           |           |            |                                  |
| Excited state 15: | Singlet-A | 6.2851 eV | 197.27 nm | $f=0.0216$ | $\langle S^{*2} \rangle = 0.000$ |
| 128 -> 134        | -0.35613  |           |           |            |                                  |
| 128 -> 135        | -0.10678  |           |           |            |                                  |
| 130 -> 134        | 0.49125   |           |           |            |                                  |
| 130 -> 136        | 0.14737   |           |           |            |                                  |
| 131 -> 134        | 0.17895   |           |           |            |                                  |
| 133 -> 140        | 0.12784   |           |           |            |                                  |
| Excited state 16: | Singlet-A | 6.3310 eV | 195.84 nm | $f=0.0052$ | $\langle S^{*2} \rangle = 0.000$ |
| 132 -> 137        | 0.40131   |           |           |            |                                  |
| 132 -> 138        | 0.24921   |           |           |            |                                  |
| 132 -> 139        | 0.27337   |           |           |            |                                  |
| 132 -> 140        | -0.28737  |           |           |            |                                  |
| 132 -> 142        | 0.19016   |           |           |            |                                  |
| 132 -> 143        | -0.18865  |           |           |            |                                  |
| 132 -> 144        | 0.13019   |           |           |            |                                  |
| Excited state 17: | Singlet-A | 6.3427 eV | 195.47 nm | $f=0.0098$ | $\langle S^{*2} \rangle = 0.000$ |
| 132 -> 136        | -0.10986  |           |           |            |                                  |
| 132 -> 138        | -0.37435  |           |           |            |                                  |
| 132 -> 139        | 0.45236   |           |           |            |                                  |
| 132 -> 142        | -0.28124  |           |           |            |                                  |
| 132 -> 143        | -0.10267  |           |           |            |                                  |
| Excited state 18: | Singlet-A | 6.3508 eV | 195.23 nm | $f=0.1206$ | $\langle S^{*2} \rangle = 0.000$ |
| 132 -> 138        | 0.38841   |           |           |            |                                  |
| 132 -> 139        | 0.28599   |           |           |            |                                  |
| 132 -> 140        | 0.34398   |           |           |            |                                  |
| 132 -> 141        | -0.20480  |           |           |            |                                  |
| 132 -> 142        | -0.12748  |           |           |            |                                  |
| 132 -> 144        | -0.19213  |           |           |            |                                  |
| Excited state 19: | Singlet-A | 6.4238 eV | 193.01 nm | $f=0.0009$ | $\langle S^{*2} \rangle = 0.000$ |
| 131 -> 134        | 0.15538   |           |           |            |                                  |
| 133 -> 140        | -0.29236  |           |           |            |                                  |
| 133 -> 142        | 0.51284   |           |           |            |                                  |
| 133 -> 143        | -0.22241  |           |           |            |                                  |
| 133 -> 144        | -0.14866  |           |           |            |                                  |
| Excited state 20: | Singlet-A | 6.4292 eV | 192.85 nm | $f=0.0118$ | $\langle S^{*2} \rangle = 0.000$ |
| 130 -> 134        | -0.18598  |           |           |            |                                  |
| 131 -> 134        | 0.43699   |           |           |            |                                  |
| 131 -> 135        | 0.21520   |           |           |            |                                  |
| 133 -> 142        | -0.26007  |           |           |            |                                  |
| 133 -> 143        | -0.30472  |           |           |            |                                  |
| Excited state 21: | Singlet-A | 6.4412 eV | 192.48 nm | $f=0.0111$ | $\langle S^{*2} \rangle = 0.000$ |

|                   |           |           |           |            |                                  |
|-------------------|-----------|-----------|-----------|------------|----------------------------------|
| 130 -> 134        | -0.18104  |           |           |            |                                  |
| 130 -> 135        | -0.15336  |           |           |            |                                  |
| 131 -> 134        | 0.35146   |           |           |            |                                  |
| 131 -> 135        | 0.10171   |           |           |            |                                  |
| 133 -> 142        | 0.10308   |           |           |            |                                  |
| 133 -> 143        | 0.49840   |           |           |            |                                  |
| Excited state 22: | Singlet-A | 6.4824 eV | 191.26 nm | $f=0.0082$ | $\langle S^{*2} \rangle = 0.000$ |
| 128 -> 134        | -0.13808  |           |           |            |                                  |
| 128 -> 135        | -0.11502  |           |           |            |                                  |
| 129 -> 134        | -0.13842  |           |           |            |                                  |
| 130 -> 135        | 0.39375   |           |           |            |                                  |
| 130 -> 136        | -0.36631  |           |           |            |                                  |
| 131 -> 135        | 0.16236   |           |           |            |                                  |
| 131 -> 136        | -0.15987  |           |           |            |                                  |
| 133 -> 143        | 0.17837   |           |           |            |                                  |
| 133 -> 144        | 0.13139   |           |           |            |                                  |
| Excited state 23: | Singlet-A | 6.5740 eV | 188.60 nm | $f=0.0948$ | $\langle S^{*2} \rangle = 0.000$ |
| 131 -> 137        | 0.10560   |           |           |            |                                  |
| 132 -> 138        | 0.19392   |           |           |            |                                  |
| 132 -> 141        | 0.55701   |           |           |            |                                  |
| 132 -> 142        | -0.25522  |           |           |            |                                  |
| 132 -> 143        | 0.11047   |           |           |            |                                  |
| 132 -> 144        | 0.13267   |           |           |            |                                  |
| Excited state 24: | Singlet-A | 6.5971 eV | 187.94 nm | $f=0.0183$ | $\langle S^{*2} \rangle = 0.000$ |
| 129 -> 134        | 0.10174   |           |           |            |                                  |
| 132 -> 140        | -0.13410  |           |           |            |                                  |
| 132 -> 142        | -0.14615  |           |           |            |                                  |
| 133 -> 142        | 0.14030   |           |           |            |                                  |
| 133 -> 143        | -0.10183  |           |           |            |                                  |
| 133 -> 144        | 0.57603   |           |           |            |                                  |
| 133 -> 146        | 0.13340   |           |           |            |                                  |
| Excited state 25: | Singlet-A | 6.6099 eV | 187.57 nm | $f=0.0164$ | $\langle S^{*2} \rangle = 0.000$ |
| 132 -> 138        | -0.15934  |           |           |            |                                  |
| 132 -> 139        | 0.22788   |           |           |            |                                  |
| 132 -> 140        | 0.30677   |           |           |            |                                  |
| 132 -> 141        | 0.23664   |           |           |            |                                  |
| 132 -> 142        | 0.39897   |           |           |            |                                  |
| 132 -> 145        | 0.10028   |           |           |            |                                  |
| 132 -> 146        | -0.12548  |           |           |            |                                  |
| 133 -> 144        | 0.18801   |           |           |            |                                  |
| Excited state 26: | Singlet-A | 6.6293 eV | 187.02 nm | $f=0.0099$ | $\langle S^{*2} \rangle = 0.000$ |
| 126 -> 134        | 0.15076   |           |           |            |                                  |
| 128 -> 135        | -0.23013  |           |           |            |                                  |
| 128 -> 136        | 0.17011   |           |           |            |                                  |
| 129 -> 134        | 0.46198   |           |           |            |                                  |
| 129 -> 136        | 0.30156   |           |           |            |                                  |
| 130 -> 135        | 0.12249   |           |           |            |                                  |
| 130 -> 136        | -0.10528  |           |           |            |                                  |
| 133 -> 144        | -0.11676  |           |           |            |                                  |
| Excited state 27: | Singlet-A | 6.6657 eV | 186.00 nm | $f=0.0065$ | $\langle S^{*2} \rangle = 0.000$ |
| 132 -> 139        | 0.22674   |           |           |            |                                  |

|                       |           |           |           |            |                                  |
|-----------------------|-----------|-----------|-----------|------------|----------------------------------|
| 132 -> 140            | -0.19676  |           |           |            |                                  |
| 132 -> 142            | 0.11069   |           |           |            |                                  |
| 132 -> 143            | 0.47711   |           |           |            |                                  |
| 132 -> 144            | -0.19337  |           |           |            |                                  |
| 132 -> 145            | 0.22011   |           |           |            |                                  |
| 132 -> 146            | 0.10137   |           |           |            |                                  |
| 132 -> 147            | -0.11438  |           |           |            |                                  |
| 133 -> 145            | -0.13168  |           |           |            |                                  |
|                       |           |           |           |            |                                  |
| Excited state 28:     | Singlet-A | 6.6755 eV | 185.73 nm | $f=0.0013$ | $\langle S^{*2} \rangle = 0.000$ |
| 128 -> 134            | -0.22836  |           |           |            |                                  |
| 128 -> 135            | 0.18219   |           |           |            |                                  |
| 128 -> 136            | -0.25668  |           |           |            |                                  |
| 129 -> 134            | 0.24361   |           |           |            |                                  |
| 129 -> 135            | 0.13653   |           |           |            |                                  |
| 131 -> 134            | -0.17217  |           |           |            |                                  |
| 131 -> 135            | 0.38177   |           |           |            |                                  |
| 131 -> 136            | -0.20658  |           |           |            |                                  |
|                       |           |           |           |            |                                  |
| Excited state 29:     | Singlet-A | 6.6927 eV | 185.25 nm | $f=0.0109$ | $\langle S^{*2} \rangle = 0.000$ |
| 132 -> 143            | 0.11645   |           |           |            |                                  |
| 133 -> 144            | -0.14867  |           |           |            |                                  |
| 133 -> 145            | 0.47017   |           |           |            |                                  |
| 133 -> 146            | 0.33434   |           |           |            |                                  |
| 133 -> 147            | 0.23033   |           |           |            |                                  |
| 133 -> 148            | -0.15113  |           |           |            |                                  |
| 133 -> 150            | -0.10721  |           |           |            |                                  |
|                       |           |           |           |            |                                  |
| Excited state 30:     | Singlet-A | 6.7327 eV | 184.15 nm | $f=0.0171$ | $\langle S^{*2} \rangle = 0.000$ |
| 128 -> 134            | -0.11920  |           |           |            |                                  |
| 128 -> 135            | 0.11587   |           |           |            |                                  |
| 128 -> 136            | -0.14658  |           |           |            |                                  |
| 130 -> 135            | 0.10828   |           |           |            |                                  |
| 131 -> 136            | 0.20762   |           |           |            |                                  |
| 131 -> 137            | 0.43667   |           |           |            |                                  |
| 131 -> 138            | -0.27286  |           |           |            |                                  |
| 132 -> 141            | -0.17305  |           |           |            |                                  |
| 132 -> 144            | 0.17787   |           |           |            |                                  |
| 132 -> 149            | -0.10757  |           |           |            |                                  |
| SavETr: write IOETrn= | 770       | NScale=   | 10        | NData=     | 16                               |
| NLR=                  | 1         | LETran=   | 520.      |            |                                  |

\*\*\*\*\*

Rotatory strengths (R) in cgs ( $10^{-40}$  erg-esu-cm/Gauss) of 5.

| State | X       | Y       | Z       | Dip. S. | Osc.(frdel) |
|-------|---------|---------|---------|---------|-------------|
| 1     | -0.0603 | -0.0080 | -0.0016 | 0.0699  | 0.0466      |
| 2     | -0.0081 | -0.0023 | -0.0035 | 0.0139  | 0.0093      |
| 3     | -0.0012 | -0.0002 | 0.0000  | 0.0015  | 0.0010      |
| 4     | -0.0302 | -0.0059 | -0.0076 | 0.0436  | 0.0291      |
| 5     | -0.0001 | -0.0002 | -0.0008 | 0.0011  | 0.0007      |
| 6     | -0.1102 | -0.0624 | -0.0159 | 0.1886  | 0.1257      |
| 7     | -0.0076 | -0.0016 | -0.0263 | 0.0354  | 0.0236      |
| 8     | -0.0023 | -0.0006 | -0.0008 | 0.0037  | 0.0025      |
| 9     | -0.0173 | -0.0005 | -0.0007 | 0.0185  | 0.0123      |



|    |         |         |         |        |        |
|----|---------|---------|---------|--------|--------|
| 10 | 0.0000  | -0.0019 | -0.0133 | 0.0152 | 0.0102 |
| 11 | -0.0001 | 0.0000  | -0.0003 | 0.0004 | 0.0002 |
| 12 | -0.0043 | -0.0017 | -0.0038 | 0.0098 | 0.0065 |
| 13 | -0.0010 | -0.0040 | -0.0004 | 0.0054 | 0.0036 |
| 14 | -0.0002 | -0.0054 | -0.0004 | 0.0059 | 0.0040 |
| 15 | -0.0249 | -0.0026 | -0.0051 | 0.0326 | 0.0217 |
| 16 | -0.0036 | -0.0006 | -0.0036 | 0.0078 | 0.0052 |
| 17 | -0.0086 | -0.0020 | -0.0038 | 0.0144 | 0.0096 |
| 18 | -0.1450 | -0.0001 | -0.0337 | 0.1788 | 0.1192 |
| 19 | -0.0007 | -0.0005 | 0.0000  | 0.0013 | 0.0009 |
| 20 | -0.0134 | -0.0001 | -0.0036 | 0.0171 | 0.0114 |
| 21 | -0.0105 | -0.0034 | -0.0026 | 0.0165 | 0.0110 |
| 22 | -0.0093 | -0.0011 | -0.0020 | 0.0124 | 0.0083 |
| 23 | -0.1347 | -0.0006 | -0.0049 | 0.1402 | 0.0934 |
| 24 | -0.0149 | -0.0108 | -0.0013 | 0.0271 | 0.0180 |
| 25 | -0.0196 | -0.0040 | -0.0009 | 0.0245 | 0.0163 |
| 26 | -0.0098 | -0.0050 | -0.0001 | 0.0149 | 0.0099 |
| 27 | 0.0000  | -0.0056 | -0.0040 | 0.0097 | 0.0064 |
| 28 | 0.0000  | -0.0008 | -0.0012 | 0.0019 | 0.0013 |
| 29 | -0.0018 | -0.0134 | -0.0006 | 0.0158 | 0.0106 |
| 30 | -0.0180 | -0.0070 | -0.0006 | 0.0256 | 0.0171 |

$1/2[\langle 0|\text{del}|b\rangle\langle b|r|0\rangle + (\langle 0|r|b\rangle\langle b|\text{del}|0\rangle)^*]$  (Au)

| State | X       | Y       | Z       | Dip. S. | Osc.(frdel) |
|-------|---------|---------|---------|---------|-------------|
| 1     | -0.0023 | -0.0011 | -0.0008 | 0.0042  | 0.0028      |
| 2     | 0.0000  | 0.0000  | 0.0000  | 0.0000  | 0.0000      |
| 3     | -0.0014 | -0.0016 | -0.0002 | 0.0031  | 0.0021      |
| 4     | -0.0331 | -0.0003 | -0.0039 | 0.0373  | 0.0249      |
| 5     | -0.0102 | -0.0045 | -0.0037 | 0.0184  | 0.0123      |
| 6     | -0.0024 | -0.0017 | -0.0012 | 0.0053  | 0.0035      |
| 7     | -0.0141 | -0.0114 | -0.0046 | 0.0301  | 0.0201      |
| 8     | -0.1599 | -0.1263 | -0.0447 | 0.3309  | 0.2206      |
| 9     | -0.0020 | -0.0006 | -0.0004 | 0.0030  | 0.0020      |
| 10    | -0.0202 | -0.0097 | -0.0111 | 0.0410  | 0.0273      |
| 11    | -0.0044 | -0.0049 | -0.0002 | 0.0096  | 0.0064      |
| 12    | 0.0000  | -0.0002 | -0.0002 | 0.0003  | 0.0002      |
| 13    | -0.0738 | -0.0029 | -0.0017 | 0.0785  | 0.0523      |
| 14    | -0.0153 | -0.0818 | -0.0098 | 0.1068  | 0.0712      |
| 15    | -0.0117 | -0.0055 | -0.0007 | 0.0178  | 0.0119      |
| 16    | -0.0230 | -0.0015 | -0.0094 | 0.0338  | 0.0226      |
| 17    | -0.0136 | -0.0024 | -0.0007 | 0.0167  | 0.0111      |
| 18    | -0.0004 | 0.0000  | -0.0014 | 0.0018  | 0.0012      |
| 19    | -0.0004 | -0.0006 | -0.0009 | 0.0019  | 0.0013      |
| 20    | -0.0481 | -0.0045 | -0.0103 | 0.0628  | 0.0419      |

|    |         |         |         |        |        |
|----|---------|---------|---------|--------|--------|
| 21 | -0.0001 | -0.0001 | -0.0018 | 0.0019 | 0.0013 |
| 22 | -0.0075 | -0.0005 | -0.0184 | 0.0264 | 0.0176 |
| 23 | -0.0576 | -0.0187 | -0.0065 | 0.0828 | 0.0552 |
| 24 | 0.0000  | 0.0000  | -0.0017 | 0.0018 | 0.0012 |
| 25 | -0.0426 | -0.0233 | -0.0027 | 0.0686 | 0.0457 |
| 26 | -0.0178 | -0.0016 | -0.0056 | 0.0250 | 0.0167 |
| 27 | -0.0113 | -0.0005 | -0.0006 | 0.0124 | 0.0083 |
| 28 | -0.0002 | -0.0034 | -0.0017 | 0.0053 | 0.0036 |
| 29 | -0.0147 | 0.0000  | -0.0127 | 0.0275 | 0.0183 |
| 30 | -0.0038 | -0.0015 | -0.0007 | 0.0061 | 0.0041 |

Ground to Excited state transition densities written to RWF 633

Excitation energies and oscillator strengths:

Excited state 1: Singlet-A 4.1082 eV 301.79 nm  $f=0.0028$   $\langle S^{*2} \rangle=0.000$   
132 ->133 0.70653

This state for optimization and/or second-order correction.

Copying the Excited state density for this state as the 1-particle RhoCI density.

Excited state 2: Singlet-A 4.5506 eV 272.46 nm  $f=0.0000$   $\langle S^{*2} \rangle=0.000$   
131 ->133 0.70668

Excited state 3: Singlet-A 4.7689 eV 259.99 nm  $f=0.0020$   $\langle S^{*2} \rangle=0.000$   
123 ->133 0.12061  
125 ->133 0.59778  
127 ->133 -0.19304  
128 ->133 -0.17695  
129 ->133 -0.20324

Excited state 4: Singlet-A 5.1428 eV 241.08 nm  $f=0.0250$   $\langle S^{*2} \rangle=0.000$   
128 ->134 -0.13121  
132 ->134 0.68505

Excited state 5: Singlet-A 5.2871 eV 234.50 nm  $f=0.0125$   $\langle S^{*2} \rangle=0.000$   
125 ->133 0.14327  
127 ->133 -0.13219  
129 ->133 0.51840  
130 ->133 0.42824

Excited state 6: Singlet-A 5.3719 eV 230.80 nm  $f=0.0035$   $\langle S^{*2} \rangle=0.000$   
125 ->133 -0.11103  
127 ->133 0.12162  
128 ->133 -0.10860  
129 ->133 -0.39294  
130 ->133 0.55115

Excited state 7: Singlet-A 5.4932 eV 225.71 nm  $f=0.0204$   $\langle S^{*2} \rangle=0.000$   
127 ->133 -0.29445  
128 ->133 0.61302  
129 ->133 -0.11516  
130 ->133 0.10529

Excited state 8: Singlet-A 5.5882 eV 221.87 nm  $f=0.2233$   $\langle S^{*2} \rangle=0.000$   
123 ->133 -0.16923

|                   |           |           |           |            |                                   |
|-------------------|-----------|-----------|-----------|------------|-----------------------------------|
| 124 ->133         | 0.10093   |           |           |            |                                   |
| 125 ->133         | 0.30067   |           |           |            |                                   |
| 127 ->133         | 0.52811   |           |           |            |                                   |
| 128 ->133         | 0.26729   |           |           |            |                                   |
| Excited state 9:  | Singlet-A | 5.6405 eV | 219.81 nm | $f=0.0020$ | $\langle S^{**2} \rangle = 0.000$ |
| 128 ->134         | 0.32459   |           |           |            |                                   |
| 129 ->134         | -0.14241  |           |           |            |                                   |
| 130 ->134         | -0.15408  |           |           |            |                                   |
| 131 ->134         | 0.56686   |           |           |            |                                   |
| 132 ->134         | 0.10261   |           |           |            |                                   |
| Excited state 10: | Singlet-A | 5.7472 eV | 215.73 nm | $f=0.0275$ | $\langle S^{**2} \rangle = 0.000$ |
| 132 ->135         | 0.60051   |           |           |            |                                   |
| 132 ->136         | 0.15748   |           |           |            |                                   |
| 132 ->137         | -0.25159  |           |           |            |                                   |
| 132 ->138         | -0.15460  |           |           |            |                                   |
| Excited state 11: | Singlet-A | 5.7835 eV | 214.38 nm | $f=0.0064$ | $\langle S^{**2} \rangle = 0.000$ |
| 126 ->133         | 0.70189   |           |           |            |                                   |
| Excited state 12: | Singlet-A | 5.7993 eV | 213.79 nm | $f=0.0002$ | $\langle S^{**2} \rangle = 0.000$ |
| 128 ->134         | 0.44197   |           |           |            |                                   |
| 129 ->134         | -0.19369  |           |           |            |                                   |
| 130 ->134         | -0.21285  |           |           |            |                                   |
| 131 ->134         | -0.41052  |           |           |            |                                   |
| 132 ->134         | 0.12279   |           |           |            |                                   |
| Excited state 13: | Singlet-A | 5.8723 eV | 211.13 nm | $f=0.0523$ | $\langle S^{**2} \rangle = 0.000$ |
| 132 ->135         | 0.34110   |           |           |            |                                   |
| 132 ->136         | -0.30925  |           |           |            |                                   |
| 132 ->137         | 0.38265   |           |           |            |                                   |
| 132 ->138         | 0.31300   |           |           |            |                                   |
| 132 ->140         | -0.12867  |           |           |            |                                   |
| Excited state 14: | Singlet-A | 5.9248 eV | 209.26 nm | $f=0.0708$ | $\langle S^{**2} \rangle = 0.000$ |
| 123 ->133         | 0.52417   |           |           |            |                                   |
| 124 ->133         | -0.36783  |           |           |            |                                   |
| 127 ->133         | 0.21854   |           |           |            |                                   |
| 129 ->133         | 0.12457   |           |           |            |                                   |
| Excited state 15: | Singlet-A | 5.9298 eV | 209.09 nm | $f=0.0122$ | $\langle S^{**2} \rangle = 0.000$ |
| 131 ->135         | 0.35207   |           |           |            |                                   |
| 131 ->136         | 0.45144   |           |           |            |                                   |
| 131 ->137         | 0.18782   |           |           |            |                                   |
| 131 ->140         | 0.28608   |           |           |            |                                   |
| 131 ->141         | -0.12346  |           |           |            |                                   |
| 131 ->142         | -0.11481  |           |           |            |                                   |
| Excited state 16: | Singlet-A | 6.0067 eV | 206.41 nm | $f=0.0225$ | $\langle S^{**2} \rangle = 0.000$ |
| 132 ->136         | 0.53450   |           |           |            |                                   |
| 132 ->137         | 0.39179   |           |           |            |                                   |
| 132 ->139         | 0.14566   |           |           |            |                                   |
| 132 ->141         | 0.11349   |           |           |            |                                   |
| Excited state 17: | Singlet-A | 6.0433 eV | 205.16 nm | $f=0.0110$ | $\langle S^{**2} \rangle = 0.000$ |
| 132 ->136         | 0.19151   |           |           |            |                                   |
| 132 ->137         | -0.19946  |           |           |            |                                   |

|                   |           |           |           |            |                                   |
|-------------------|-----------|-----------|-----------|------------|-----------------------------------|
| 132 ->138         | 0.48046   |           |           |            |                                   |
| 132 ->139         | -0.39919  |           |           |            |                                   |
| Excited state 18: | Singlet-A | 6.0777 eV | 204.00 nm | $f=0.0013$ | $\langle S^{**2} \rangle = 0.000$ |
| 131 ->135         | 0.57469   |           |           |            |                                   |
| 131 ->136         | -0.32911  |           |           |            |                                   |
| 131 ->140         | -0.14476  |           |           |            |                                   |
| 131 ->142         | 0.13642   |           |           |            |                                   |
| Excited state 19: | Singlet-A | 6.0925 eV | 203.50 nm | $f=0.0013$ | $\langle S^{**2} \rangle = 0.000$ |
| 122 ->133         | -0.15521  |           |           |            |                                   |
| 123 ->133         | 0.36903   |           |           |            |                                   |
| 124 ->133         | 0.57861   |           |           |            |                                   |
| Excited state 20: | Singlet-A | 6.1610 eV | 201.24 nm | $f=0.0421$ | $\langle S^{**2} \rangle = 0.000$ |
| 132 ->137         | -0.28432  |           |           |            |                                   |
| 132 ->138         | 0.30756   |           |           |            |                                   |
| 132 ->139         | 0.49775   |           |           |            |                                   |
| 132 ->140         | -0.21737  |           |           |            |                                   |
| Excited state 21: | Singlet-A | 6.2256 eV | 199.15 nm | $f=0.0013$ | $\langle S^{**2} \rangle = 0.000$ |
| 132 ->136         | -0.13036  |           |           |            |                                   |
| 132 ->138         | 0.11207   |           |           |            |                                   |
| 132 ->139         | 0.20687   |           |           |            |                                   |
| 132 ->140         | 0.50354   |           |           |            |                                   |
| 132 ->141         | 0.32460   |           |           |            |                                   |
| 132 ->142         | -0.14917  |           |           |            |                                   |
| 132 ->143         | -0.10799  |           |           |            |                                   |
| 132 ->144         | 0.10146   |           |           |            |                                   |
| Excited state 22: | Singlet-A | 6.2573 eV | 198.14 nm | $f=0.0179$ | $\langle S^{**2} \rangle = 0.000$ |
| 113 ->133         | -0.11096  |           |           |            |                                   |
| 119 ->133         | -0.22398  |           |           |            |                                   |
| 120 ->133         | 0.50072   |           |           |            |                                   |
| 121 ->133         | -0.32117  |           |           |            |                                   |
| 122 ->133         | 0.20778   |           |           |            |                                   |
| Excited state 23: | Singlet-A | 6.3201 eV | 196.17 nm | $f=0.0560$ | $\langle S^{**2} \rangle = 0.000$ |
| 131 ->135         | -0.12247  |           |           |            |                                   |
| 131 ->137         | 0.59517   |           |           |            |                                   |
| 131 ->138         | -0.17984  |           |           |            |                                   |
| 131 ->140         | -0.15999  |           |           |            |                                   |
| 131 ->143         | 0.18413   |           |           |            |                                   |
| Excited state 24: | Singlet-A | 6.3325 eV | 195.79 nm | $f=0.0012$ | $\langle S^{**2} \rangle = 0.000$ |
| 120 ->133         | -0.11032  |           |           |            |                                   |
| 121 ->133         | 0.22496   |           |           |            |                                   |
| 122 ->133         | 0.63392   |           |           |            |                                   |
| 123 ->133         | 0.13699   |           |           |            |                                   |
| Excited state 25: | Singlet-A | 6.3438 eV | 195.44 nm | $f=0.0462$ | $\langle S^{**2} \rangle = 0.000$ |
| 131 ->136         | -0.24705  |           |           |            |                                   |
| 131 ->137         | 0.13042   |           |           |            |                                   |
| 131 ->138         | 0.38708   |           |           |            |                                   |
| 131 ->140         | 0.29722   |           |           |            |                                   |
| 131 ->141         | -0.31615  |           |           |            |                                   |
| 131 ->142         | 0.12471   |           |           |            |                                   |

|                   |           |           |           |            |                                  |
|-------------------|-----------|-----------|-----------|------------|----------------------------------|
| 131 ->143         | -0.11413  |           |           |            |                                  |
| 131 ->146         | 0.11333   |           |           |            |                                  |
| Excited state 26: | Singlet-A | 6.3682 eV | 194.69 nm | $f=0.0170$ | $\langle S^{*2} \rangle = 0.000$ |
| 131 ->136         | 0.30032   |           |           |            |                                  |
| 131 ->138         | 0.40660   |           |           |            |                                  |
| 131 ->140         | -0.32998  |           |           |            |                                  |
| 131 ->142         | 0.30333   |           |           |            |                                  |
| 131 ->145         | 0.10806   |           |           |            |                                  |
| Excited state 27: | Singlet-A | 6.3960 eV | 193.85 nm | $f=0.0083$ | $\langle S^{*2} \rangle = 0.000$ |
| 132 ->138         | -0.12189  |           |           |            |                                  |
| 132 ->140         | -0.39327  |           |           |            |                                  |
| 132 ->141         | 0.46795   |           |           |            |                                  |
| 132 ->142         | -0.21144  |           |           |            |                                  |
| 132 ->143         | -0.11146  |           |           |            |                                  |
| 132 ->146         | 0.11266   |           |           |            |                                  |
| Excited state 28: | Singlet-A | 6.4373 eV | 192.60 nm | $f=0.0036$ | $\langle S^{*2} \rangle = 0.000$ |
| 132 ->141         | 0.29178   |           |           |            |                                  |
| 132 ->142         | 0.60981   |           |           |            |                                  |
| 132 ->145         | -0.11262  |           |           |            |                                  |
| Excited state 29: | Singlet-A | 6.4813 eV | 191.29 nm | $f=0.0185$ | $\langle S^{*2} \rangle = 0.000$ |
| 119 ->133         | 0.48801   |           |           |            |                                  |
| 120 ->133         | 0.42128   |           |           |            |                                  |
| 121 ->133         | 0.22189   |           |           |            |                                  |
| Excited state 30: | Singlet-A | 6.5136 eV | 190.35 nm | $f=0.0041$ | $\langle S^{*2} \rangle = 0.000$ |
| 132 ->143         | 0.50653   |           |           |            |                                  |
| 132 ->144         | 0.43652   |           |           |            |                                  |
| 132 ->146         | 0.12375   |           |           |            |                                  |

SavETr: write IOETrn= 770 NScale= 10 NData= 16 NLR=1 LETran= 520.

\*\*\*\*\*

Rotatory strengths (R) in cgs ( $10^{-40}$  erg-esu-cm/Gauss) of 6.

| State | XX       | YY       | ZZ        | R (length) | R (au)  |
|-------|----------|----------|-----------|------------|---------|
| 1     | 61.9263  | -6.0644  | 11.2607   | 22.3742    | 0.0475  |
| 2     | -0.3340  | 2.1565   | 0.1289    | 0.6505     | 0.0014  |
| 3     | -5.1453  | -0.3589  | -1.2409   | -2.2483    | -0.0048 |
| 4     | 18.1441  | -0.5436  | -15.8431  | 0.5858     | 0.0012  |
| 5     | 143.1945 | -52.4799 | -83.5875  | 2.3757     | 0.0050  |
| 6     | 5.5952   | 5.5298   | -1.0662   | 3.3529     | 0.0071  |
| 7     | 93.0600  | -36.0326 | -23.8204  | 11.0690    | 0.0235  |
| 8     | -0.6222  | -0.2492  | -0.2871   | -0.3862    | -0.0008 |
| 9     | -11.8283 | -0.9271  | -7.9217   | -6.8924    | -0.0146 |
| 10    | 128.4627 | -26.9986 | -128.0593 | -8.8651    | -0.0188 |
| 11    | -8.6919  | 13.4795  | 36.2785   | 13.6887    | 0.0290  |
| 12    | 0.0399   | 1.0178   | -13.4273  | -4.1232    | -0.0087 |
| 13    | 186.8732 | -42.0537 | -79.2831  | 21.8455    | 0.0463  |
| 14    | 31.0577  | -7.1806  | -21.4940  | 0.7944     | 0.0017  |

|    |          |          |           |         |         |
|----|----------|----------|-----------|---------|---------|
| 15 | 103.6131 | 116.4600 | -195.5100 | 8.1877  | 0.0174  |
| 16 | 30.4493  | 10.6933  | -10.6367  | 10.1686 | 0.0216  |
| 17 | 3.9076   | -0.5164  | 18.6239   | 7.3384  | 0.0156  |
| 18 | 8.9034   | 23.2970  | -61.0778  | -9.6258 | -0.0204 |
| 19 | 0.3119   | -8.8786  | 3.6702    | -1.6322 | -0.0035 |
| 20 | -25.0679 | -5.2705  | 6.7871    | -7.8504 | -0.0167 |
| 21 | 1.8112   | 25.1542  | -23.0182  | 1.3157  | 0.0028  |
| 22 | -0.7354  | 4.0843   | 2.5659    | 1.9716  | 0.0042  |
| 23 | -5.7119  | 4.4497   | -15.2864  | -5.5162 | -0.0117 |
| 24 | -15.0062 | -4.3154  | -7.6858   | -9.0025 | -0.0191 |
| 25 | 11.2771  | -4.1600  | 17.4434   | 8.1868  | 0.0174  |
| 26 | 5.7852   | -18.8080 | 7.7710    | -1.7506 | -0.0037 |
| 27 | 3.7937   | -13.8979 | 82.3483   | 24.0813 | 0.0511  |
| 28 | 21.9607  | 5.4270   | -25.1064  | 0.7605  | 0.0016  |
| 29 | 2.4884   | -2.1023  | 18.7883   | 6.3915  | 0.0136  |
| 30 | 23.5433  | -60.2972 | 22.7585   | -4.6651 | -0.0099 |

$1/2[\langle 0|\text{del}b\rangle\langle b|r|0\rangle + (\langle 0|r|b\rangle\langle b|\text{del}|0\rangle)^*]$  (Au)

| State | X       | Y       | Z       | Dip. S. | Osc.(frdel) |
|-------|---------|---------|---------|---------|-------------|
| 1     | -0.0328 | -0.0004 | -0.0036 | 0.0368  | 0.0245      |
| 2     | 0.0000  | -0.0007 | -0.0001 | 0.0007  | 0.0005      |
| 3     | -0.0002 | 0.0000  | -0.0001 | 0.0002  | 0.0002      |
| 4     | -0.0024 | 0.0000  | -0.0001 | 0.0026  | 0.0017      |
| 5     | -0.0247 | -0.0066 | -0.0123 | 0.0436  | 0.0290      |
| 6     | -0.0002 | -0.0001 | -0.0001 | 0.0003  | 0.0002      |
| 7     | -0.0552 | -0.0015 | -0.0009 | 0.0576  | 0.0384      |
| 8     | -0.0001 | 0.0000  | 0.0000  | 0.0001  | 0.0001      |
| 9     | -0.0143 | -0.0026 | -0.0002 | 0.0170  | 0.0114      |
| 10    | -0.0453 | -0.0017 | -0.0130 | 0.0599  | 0.0400      |
| 11    | -0.0079 | -0.0032 | -0.0022 | 0.0132  | 0.0088      |
| 12    | -0.0006 | 0.0000  | -0.0024 | 0.0030  | 0.0020      |
| 13    | -0.0609 | -0.0027 | -0.0070 | 0.0705  | 0.0470      |
| 14    | -0.0039 | -0.0002 | -0.0035 | 0.0076  | 0.0051      |
| 15    | -0.0892 | -0.0327 | -0.0082 | 0.1302  | 0.0868      |
| 16    | -0.0044 | -0.0066 | -0.0005 | 0.0115  | 0.0077      |
| 17    | -0.0139 | -0.0023 | -0.0008 | 0.0170  | 0.0113      |
| 18    | -0.0179 | -0.0018 | -0.0043 | 0.0240  | 0.0160      |
| 19    | 0.0000  | -0.0038 | -0.0018 | 0.0056  | 0.0037      |
| 20    | -0.0044 | -0.0024 | -0.0003 | 0.0071  | 0.0048      |
| 21    | -0.0757 | -0.0305 | -0.0001 | 0.1063  | 0.0709      |
| 22    | -0.0001 | -0.0001 | -0.0038 | 0.0039  | 0.0026      |
| 23    | -0.0010 | -0.0001 | -0.0034 | 0.0045  | 0.0030      |
| 24    | -0.0330 | -0.0115 | -0.0001 | 0.0446  | 0.0297      |
| 25    | -0.0010 | -0.0001 | -0.0050 | 0.0061  | 0.0041      |

|    |         |         |         |        |        |
|----|---------|---------|---------|--------|--------|
| 26 | -0.0060 | -0.0024 | -0.0003 | 0.0087 | 0.0058 |
| 27 | -0.0027 | -0.0060 | -0.0085 | 0.0173 | 0.0115 |
| 28 | -0.0007 | -0.0007 | -0.0018 | 0.0031 | 0.0021 |
| 29 | -0.0008 | -0.0005 | -0.0011 | 0.0024 | 0.0016 |
| 30 | -0.0135 | -0.0135 | -0.0006 | 0.0276 | 0.0184 |

Ground to Excited state transition densities written to RWF 633

Excitation energies and oscillator strengths:

Excited state 1: Singlet-A 5.1273 eV 241.81 nm  $f=0.0246$   $\langle S^{*2} \rangle = 0.000$   
129 -> 135 0.12000  
133 -> 134 -0.16691  
133 -> 135 0.66569

This state for optimization and/or second-order correction.

Copying the Excited state density for this state as the 1-particle RhoCI density.

Excited state 2: Singlet-A 5.4142 eV 229.00 nm  $f=0.0005$   $\langle S^{*2} \rangle = 0.000$   
133 -> 134 0.68439  
133 -> 135 0.16679

Excited state 3: Singlet-A 5.6422 eV 219.75 nm  $f=0.0002$   $\langle S^{*2} \rangle = 0.000$   
128 -> 135 0.10145  
129 -> 135 0.32511  
130 -> 135 -0.13308  
131 -> 135 -0.16608  
132 -> 134 -0.13776  
132 -> 135 0.53533  
133 -> 135 -0.10840

Excited state 4: Singlet-A 5.6839 eV 218.13 nm  $f=0.0014$   $\langle S^{*2} \rangle = 0.000$   
128 -> 134 0.58094  
129 -> 134 -0.25737  
130 -> 134 -0.17058

Excited state 5: Singlet-A 5.7304 eV 216.36 nm  $f=0.0292$   $\langle S^{*2} \rangle = 0.000$   
133 -> 136 0.61146  
133 -> 137 0.10411  
133 -> 138 -0.28342  
133 -> 139 -0.10489

Excited state 6: Singlet-A 5.7994 eV 213.79 nm  $f=0.0002$   $\langle S^{*2} \rangle = 0.000$   
128 -> 135 0.12565  
129 -> 135 0.40804  
130 -> 135 -0.16607  
131 -> 135 -0.21126  
132 -> 134 0.15630  
132 -> 135 -0.40401  
133 -> 135 -0.11420

Excited state 7: Singlet-A 5.8461 eV 212.08 nm  $f=0.0385$   $\langle S^{*2} \rangle = 0.000$   
133 -> 136 0.32399  
133 -> 137 -0.21462  
133 -> 138 0.46996  
133 -> 139 0.29800

Excited state 8: Singlet-A 5.9049 eV 209.97 nm  $f=0.0001$   $\langle S^{*2} \rangle = 0.000$

|                   |           |           |           |            |                                |  |
|-------------------|-----------|-----------|-----------|------------|--------------------------------|--|
| 132 -> 134        | 0.66031   |           |           |            |                                |  |
| 132 -> 135        | 0.20141   |           |           |            |                                |  |
| Excited state 9:  | Singlet-A | 5.9306 eV | 209.06 nm | $f=0.0117$ | $\langle S^{*2} \rangle=0.000$ |  |
| 132 -> 134        | -0.13765  |           |           |            |                                |  |
| 132 -> 136        | 0.35617   |           |           |            |                                |  |
| 132 -> 137        | 0.45474   |           |           |            |                                |  |
| 132 -> 141        | 0.30012   |           |           |            |                                |  |
| 132 -> 143        | -0.14435  |           |           |            |                                |  |
| Excited state 10: | Singlet-A | 5.9794 eV | 207.35 nm | $f=0.0399$ | $\langle S^{*2} \rangle=0.000$ |  |
| 133 -> 137        | 0.60554   |           |           |            |                                |  |
| 133 -> 138        | 0.25806   |           |           |            |                                |  |
| 133 -> 140        | -0.14777  |           |           |            |                                |  |
| 133 -> 142        | 0.13303   |           |           |            |                                |  |
| Excited state 11: | Singlet-A | 6.0129 eV | 206.20 nm | $f=0.0088$ | $\langle S^{*2} \rangle=0.000$ |  |
| 133 -> 137        | 0.13674   |           |           |            |                                |  |
| 133 -> 138        | -0.16818  |           |           |            |                                |  |
| 133 -> 139        | 0.37068   |           |           |            |                                |  |
| 133 -> 140        | 0.53140   |           |           |            |                                |  |
| 133 -> 142        | 0.10685   |           |           |            |                                |  |
| Excited state 12: | Singlet-A | 6.0850 eV | 203.75 nm | $f=0.0021$ | $\langle S^{*2} \rangle=0.000$ |  |
| 132 -> 136        | 0.56475   |           |           |            |                                |  |
| 132 -> 137        | -0.32757  |           |           |            |                                |  |
| 132 -> 141        | -0.14485  |           |           |            |                                |  |
| 132 -> 143        | 0.13654   |           |           |            |                                |  |
| Excited state 13: | Singlet-A | 6.1138 eV | 202.79 nm | $f=0.0471$ | $\langle S^{*2} \rangle=0.000$ |  |
| 132 -> 136        | 0.10316   |           |           |            |                                |  |
| 133 -> 138        | -0.27907  |           |           |            |                                |  |
| 133 -> 139        | 0.46994   |           |           |            |                                |  |
| 133 -> 140        | -0.40732  |           |           |            |                                |  |
| Excited state 14: | Singlet-A | 6.2092 eV | 199.68 nm | $f=0.0051$ | $\langle S^{*2} \rangle=0.000$ |  |
| 133 -> 137        | -0.13743  |           |           |            |                                |  |
| 133 -> 141        | 0.49959   |           |           |            |                                |  |
| 133 -> 142        | 0.40829   |           |           |            |                                |  |
| 133 -> 144        | 0.11451   |           |           |            |                                |  |
| 133 -> 147        | -0.11466  |           |           |            |                                |  |
| Excited state 15: | Singlet-A | 6.3289 eV | 195.90 nm | $f=0.0880$ | $\langle S^{*2} \rangle=0.000$ |  |
| 132 -> 138        | 0.47810   |           |           |            |                                |  |
| 132 -> 139        | -0.34643  |           |           |            |                                |  |
| 132 -> 140        | -0.13273  |           |           |            |                                |  |
| 132 -> 141        | -0.20888  |           |           |            |                                |  |
| 132 -> 144        | -0.22509  |           |           |            |                                |  |
| Excited state 16: | Singlet-A | 6.3419 eV | 195.50 nm | $f=0.0077$ | $\langle S^{*2} \rangle=0.000$ |  |
| 132 -> 136        | -0.12000  |           |           |            |                                |  |
| 132 -> 137        | -0.16793  |           |           |            |                                |  |
| 132 -> 138        | 0.34256   |           |           |            |                                |  |
| 132 -> 139        | 0.22596   |           |           |            |                                |  |
| 132 -> 141        | 0.21330   |           |           |            |                                |  |
| 132 -> 142        | -0.31373  |           |           |            |                                |  |
| 132 -> 146        | 0.12893   |           |           |            |                                |  |



|                   |           |           |           |            |                                   |
|-------------------|-----------|-----------|-----------|------------|-----------------------------------|
| 133 -> 141        | 0.21661   |           |           |            |                                   |
| 133 -> 142        | -0.22385  |           |           |            |                                   |
| Excited state 17: | Singlet-A | 6.3549 eV | 195.10 nm | $f=0.0114$ | $\langle S^{**2} \rangle = 0.000$ |
| 132 -> 138        | -0.15197  |           |           |            |                                   |
| 132 -> 139        | -0.15499  |           |           |            |                                   |
| 132 -> 141        | -0.13044  |           |           |            |                                   |
| 132 -> 142        | 0.16903   |           |           |            |                                   |
| 133 -> 141        | 0.41687   |           |           |            |                                   |
| 133 -> 142        | -0.40680  |           |           |            |                                   |
| 133 -> 144        | -0.11847  |           |           |            |                                   |
| 133 -> 147        | 0.11091   |           |           |            |                                   |
| Excited state 18: | Singlet-A | 6.3672 eV | 194.72 nm | $f=0.0162$ | $\langle S^{**2} \rangle = 0.000$ |
| 132 -> 137        | 0.32938   |           |           |            |                                   |
| 132 -> 139        | 0.41873   |           |           |            |                                   |
| 132 -> 140        | -0.11734  |           |           |            |                                   |
| 132 -> 141        | -0.31213  |           |           |            |                                   |
| 132 -> 142        | -0.13316  |           |           |            |                                   |
| 132 -> 143        | 0.24130   |           |           |            |                                   |
| Excited state 19: | Singlet-A | 6.4364 eV | 192.63 nm | $f=0.0037$ | $\langle S^{**2} \rangle = 0.000$ |
| 133 -> 143        | 0.66117   |           |           |            |                                   |
| 133 -> 146        | 0.12665   |           |           |            |                                   |
| Excited state 20: | Singlet-A | 6.4791 eV | 191.36 nm | $f=0.0048$ | $\langle S^{**2} \rangle = 0.000$ |
| 133 -> 142        | -0.14884  |           |           |            |                                   |
| 133 -> 144        | 0.65759   |           |           |            |                                   |
| 133 -> 147        | 0.11009   |           |           |            |                                   |
| Excited state 21: | Singlet-A | 6.4954 eV | 190.88 nm | $f=0.0718$ | $\langle S^{**2} \rangle = 0.000$ |
| 132 -> 140        | 0.64767   |           |           |            |                                   |
| 132 -> 141        | -0.19442  |           |           |            |                                   |
| Excited state 22: | Singlet-A | 6.5105 eV | 190.44 nm | $f=0.0027$ | $\langle S^{**2} \rangle = 0.000$ |
| 133 -> 142        | 0.10339   |           |           |            |                                   |
| 133 -> 143        | 0.13737   |           |           |            |                                   |
| 133 -> 145        | 0.65179   |           |           |            |                                   |
| Excited state 23: | Singlet-A | 6.5488 eV | 189.32 nm | $f=0.0031$ | $\langle S^{**2} \rangle = 0.000$ |
| 132 -> 138        | 0.27590   |           |           |            |                                   |
| 132 -> 139        | 0.29770   |           |           |            |                                   |
| 132 -> 142        | 0.49697   |           |           |            |                                   |
| 132 -> 143        | -0.19365  |           |           |            |                                   |
| 132 -> 147        | 0.15350   |           |           |            |                                   |
| Excited state 24: | Singlet-A | 6.5794 eV | 188.44 nm | $f=0.0304$ | $\langle S^{**2} \rangle = 0.000$ |
| 129 -> 135        | 0.23158   |           |           |            |                                   |
| 130 -> 135        | -0.14694  |           |           |            |                                   |
| 131 -> 134        | -0.23610  |           |           |            |                                   |
| 131 -> 135        | 0.59103   |           |           |            |                                   |
| Excited state 25: | Singlet-A | 6.6087 eV | 187.61 nm | $f=0.0042$ | $\langle S^{**2} \rangle = 0.000$ |
| 128 -> 134        | 0.12743   |           |           |            |                                   |
| 130 -> 134        | 0.55404   |           |           |            |                                   |
| 131 -> 134        | 0.33400   |           |           |            |                                   |
| 131 -> 135        | 0.16004   |           |           |            |                                   |

|                   |           |           |           |            |                                  |
|-------------------|-----------|-----------|-----------|------------|----------------------------------|
| Excited state 26: | Singlet-A | 6.6664 eV | 185.98 nm | $f=0.0058$ | $\langle S^{*2} \rangle = 0.000$ |
| 131 -> 136        | -0.11199  |           |           |            |                                  |
| 132 -> 138        | 0.11828   |           |           |            |                                  |
| 132 -> 141        | 0.30481   |           |           |            |                                  |
| 132 -> 142        | 0.16621   |           |           |            |                                  |
| 132 -> 143        | 0.44888   |           |           |            |                                  |
| 132 -> 144        | 0.10204   |           |           |            |                                  |
| 132 -> 146        | -0.29244  |           |           |            |                                  |
| 132 -> 147        | -0.14318  |           |           |            |                                  |
| Excited state 27: | Singlet-A | 6.6791 eV | 185.63 nm | $f=0.0118$ | $\langle S^{*2} \rangle = 0.000$ |
| 130 -> 135        | 0.16219   |           |           |            |                                  |
| 130 -> 136        | 0.20659   |           |           |            |                                  |
| 130 -> 137        | -0.11502  |           |           |            |                                  |
| 131 -> 136        | 0.46129   |           |           |            |                                  |
| 131 -> 137        | 0.16549   |           |           |            |                                  |
| 131 -> 138        | 0.13187   |           |           |            |                                  |
| 132 -> 144        | -0.16731  |           |           |            |                                  |
| 132 -> 146        | -0.10694  |           |           |            |                                  |
| 133 -> 148        | -0.10840  |           |           |            |                                  |
| Excited state 28: | Singlet-A | 6.6929 eV | 185.25 nm | $f=0.0021$ | $\langle S^{*2} \rangle = 0.000$ |
| 128 -> 135        | 0.11114   |           |           |            |                                  |
| 129 -> 135        | 0.17459   |           |           |            |                                  |
| 130 -> 135        | 0.50202   |           |           |            |                                  |
| 130 -> 136        | 0.17253   |           |           |            |                                  |
| 130 -> 138        | -0.15233  |           |           |            |                                  |
| 130 -> 140        | 0.13451   |           |           |            |                                  |
| 131 -> 136        | -0.11860  |           |           |            |                                  |
| 131 -> 137        | -0.12812  |           |           |            |                                  |
| 131 -> 138        | -0.11277  |           |           |            |                                  |
| 132 -> 144        | 0.15024   |           |           |            |                                  |
| Excited state 29: | Singlet-A | 6.7086 eV | 184.81 nm | $f=0.0016$ | $\langle S^{*2} \rangle = 0.000$ |
| 129 -> 134        | -0.13229  |           |           |            |                                  |
| 129 -> 136        | 0.11610   |           |           |            |                                  |
| 130 -> 134        | -0.23763  |           |           |            |                                  |
| 130 -> 135        | 0.15967   |           |           |            |                                  |
| 130 -> 136        | -0.27255  |           |           |            |                                  |
| 131 -> 134        | 0.37505   |           |           |            |                                  |
| 131 -> 135        | 0.13019   |           |           |            |                                  |
| 131 -> 137        | 0.19934   |           |           |            |                                  |
| 132 -> 144        | -0.15430  |           |           |            |                                  |
| 133 -> 148        | 0.14029   |           |           |            |                                  |
| Excited state 30: | Singlet-A | 6.7178 eV | 184.56 nm | $f=0.0189$ | $\langle S^{*2} \rangle = 0.000$ |
| 129 -> 136        | -0.13676  |           |           |            |                                  |
| 130 -> 134        | -0.22289  |           |           |            |                                  |
| 130 -> 135        | -0.10654  |           |           |            |                                  |
| 130 -> 136        | 0.13310   |           |           |            |                                  |
| 130 -> 138        | 0.10762   |           |           |            |                                  |
| 131 -> 134        | 0.38211   |           |           |            |                                  |
| 131 -> 135        | 0.11779   |           |           |            |                                  |
| 131 -> 137        | -0.20990  |           |           |            |                                  |
| 132 -> 144        | 0.24331   |           |           |            |                                  |
| 133 -> 147        | -0.10108  |           |           |            |                                  |

133 -> 148            -0.14412  
 SavETr: write IOETrn= 770 NScale= 10 NData= 16 NLR=1 LETran= 520.  
 \*\*\*\*\*

Rotatory strengths (R) in cgs (10\*\*<sup>-40</sup> erg-esu-cm/Gauss) of 7.

| State | XX       | YY        | ZZ        | R (length) | R (au)  |
|-------|----------|-----------|-----------|------------|---------|
| 1     | 4.5008   | -67.8890  | 121.9460  | 19.5193    | 0.0414  |
| 2     | 198.3666 | -22.6075  | -270.4566 | -31.5658   | -0.0670 |
| 3     | 0.2782   | -0.0991   | 1.3428    | 0.5073     | 0.0011  |
| 4     | 2.0743   | 21.3842   | 16.0678   | 13.1754    | 0.0279  |
| 5     | 2.3082   | 0.4976    | 18.8028   | 7.2029     | 0.0153  |
| 6     | -0.2094  | -13.9189  | 2.0193    | -4.0363    | -0.0086 |
| 7     | 0.7786   | -2.7082   | 0.1326    | -0.5990    | -0.0013 |
| 8     | 1.5279   | 7.3163    | 0.9328    | 3.2590     | 0.0069  |
| 9     | -11.0054 | 0.1824    | 18.5027   | 2.5599     | 0.0054  |
| 10    | -2.1788  | -268.5521 | 301.7788  | 10.3493    | 0.0220  |
| 11    | -2.9809  | -43.7806  | 44.4208   | -0.7802    | -0.0017 |
| 12    | 0.1443   | -0.3887   | 1.0308    | 0.2621     | 0.0006  |
| 13    | 16.6473  | -1.3523   | 1.2602    | 5.5184     | 0.0117  |
| 14    | 71.7036  | -10.4982  | 24.4515   | 28.5523    | 0.0606  |
| 15    | -8.0571  | -7.5421   | 8.1673    | -2.4773    | -0.0053 |
| 16    | 7.0193   | 121.0127  | -208.4207 | -26.7962   | -0.0568 |
| 17    | -2.1284  | 1.3719    | 0.0171    | -0.2465    | -0.0005 |
| 18    | 24.5759  | -4.5554   | -1.4090   | 6.2038     | 0.0132  |
| 19    | 33.6442  | -29.9875  | 20.2297   | 7.9621     | 0.0169  |
| 20    | 16.5469  | -454.0823 | 377.6848  | -19.9502   | -0.0423 |
| 21    | 15.9955  | -227.1936 | 387.7458  | 58.8492    | 0.1248  |
| 22    | 0.1746   | -3.0036   | 12.1381   | 3.1031     | 0.0066  |
| 23    | -19.2954 | 2.7057    | -16.3325  | -10.9741   | -0.0233 |
| 24    | -7.8285  | -57.3774  | 55.1326   | -3.3578    | -0.0071 |
| 25    | -17.2157 | -11.1442  | 23.4262   | -1.6446    | -0.0035 |
| 26    | -27.5071 | -18.7227  | 22.6259   | -7.8680    | -0.0167 |
| 27    | 9.6333   | -18.4609  | 42.7754   | 11.3160    | 0.0240  |
| 28    | -4.8699  | -22.9664  | 21.9604   | -1.9586    | -0.0042 |
| 29    | 6.4970   | -2.6580   | -13.1495  | -3.1035    | -0.0066 |
| 30    | 29.6411  | 26.3539   | 10.0943   | 22.0298    | 0.0467  |

1/2[<0|del|b>\*<b|r|0> + (<0|r|b>\*<b|del|0>)\*] (Au)

| State | X       | Y       | Z       | Dip. S. | Osc.(frdel) |
|-------|---------|---------|---------|---------|-------------|
| 1     | -0.0115 | -0.0246 | -0.0098 | 0.0459  | 0.0306      |
| 2     | -0.0106 | -0.0151 | -0.2277 | 0.2535  | 0.1690      |
| 3     | -0.0008 | -0.0001 | -0.0003 | 0.0012  | 0.0008      |
| 4     | -0.0010 | -0.0059 | -0.0038 | 0.0106  | 0.0071      |
| 5     | -0.0031 | -0.0035 | -0.0079 | 0.0144  | 0.0096      |
| 6     | -0.0001 | -0.0019 | -0.0047 | 0.0067  | 0.0044      |
| 7     | -0.0019 | -0.0004 | 0.0000  | 0.0023  | 0.0015      |

|    |         |         |         |        |        |
|----|---------|---------|---------|--------|--------|
| 8  | -0.0001 | -0.0020 | -0.0018 | 0.0038 | 0.0025 |
| 9  | -0.0028 | -0.0008 | -0.0104 | 0.0140 | 0.0093 |
| 10 | -0.0387 | -0.0221 | -0.0668 | 0.1276 | 0.0851 |
| 11 | -0.0064 | -0.0032 | -0.0141 | 0.0237 | 0.0158 |
| 12 | -0.0002 | -0.0001 | -0.0014 | 0.0017 | 0.0011 |
| 13 | -0.0005 | -0.0002 | -0.0016 | 0.0023 | 0.0016 |
| 14 | -0.0066 | -0.0022 | -0.0038 | 0.0126 | 0.0084 |
| 15 | -0.0021 | -0.0043 | -0.0009 | 0.0074 | 0.0049 |
| 16 | -0.0571 | -0.0184 | -0.0189 | 0.0944 | 0.0629 |
| 17 | -0.0003 | -0.0001 | 0.0000  | 0.0003 | 0.0002 |
| 18 | -0.0033 | -0.0001 | -0.0008 | 0.0042 | 0.0028 |
| 19 | -0.0178 | -0.0069 | -0.0007 | 0.0255 | 0.0170 |
| 20 | -0.0004 | -0.0514 | -0.0703 | 0.1221 | 0.0814 |
| 21 | -0.0035 | -0.0508 | -0.0343 | 0.0886 | 0.0591 |
| 22 | -0.0014 | -0.0014 | -0.0007 | 0.0036 | 0.0024 |
| 23 | -0.0246 | -0.0002 | -0.0035 | 0.0283 | 0.0188 |
| 24 | -0.0014 | -0.0171 | -0.0050 | 0.0235 | 0.0156 |
| 25 | -0.0045 | -0.0007 | -0.0062 | 0.0114 | 0.0076 |
| 26 | -0.0065 | -0.0009 | -0.0074 | 0.0148 | 0.0099 |
| 27 | -0.0741 | -0.0011 | -0.0076 | 0.0828 | 0.0552 |
| 28 | -0.0007 | -0.0027 | -0.0062 | 0.0096 | 0.0064 |
| 29 | -0.0275 | 0.0000  | -0.0134 | 0.0410 | 0.0273 |
| 30 | -0.0066 | -0.0099 | -0.0004 | 0.0169 | 0.0113 |

Ground to Excited state transition densities written to RWF 633

Excitation energies and oscillator strengths:

Excited state 1: Singlet-A 3.5692 eV 347.37 nm  $f=0.0310$   $\langle S^{*2} \rangle = 0.000$   
127  $\rightarrow$  128 0.70116

This state for optimization and/or second-order correction.

Copying the Excited state density for this state as the 1-particle RhoCI density.

Excited state 2: Singlet-A 4.4773 eV 276.92 nm  $f=0.1696$   $\langle S^{*2} \rangle = 0.000$   
127  $\rightarrow$  129 0.69391

Excited state 3: Singlet-A 4.6265 eV 267.99 nm  $f=0.0008$   $\langle S^{*2} \rangle = 0.000$   
126  $\rightarrow$  128 0.70570

Excited state 4: Singlet-A 4.8100 eV 257.76 nm  $f=0.0069$   $\langle S^{*2} \rangle = 0.000$   
119  $\rightarrow$  128 0.14340  
120  $\rightarrow$  128 0.12595  
122  $\rightarrow$  128 0.60232  
123  $\rightarrow$  128 -0.20976  
124  $\rightarrow$  128 -0.10125  
125  $\rightarrow$  128 -0.10469

Excited state 5: Singlet-A 4.9274 eV 251.62 nm  $f=0.0099$   $\langle S^{*2} \rangle = 0.000$   
125  $\rightarrow$  130 0.11992  
127  $\rightarrow$  130 0.68289

|                   |           |           |           |            |                                  |
|-------------------|-----------|-----------|-----------|------------|----------------------------------|
| Excited state 6:  | Singlet-A | 5.0534 eV | 245.35 nm | $f=0.0046$ | $\langle S^{*2} \rangle = 0.000$ |
| 123 ->128         | -0.15471  |           |           |            |                                  |
| 124 ->128         | 0.16258   |           |           |            |                                  |
| 125 ->128         | 0.65604   |           |           |            |                                  |
| Excited state 7:  | Singlet-A | 5.1452 eV | 240.97 nm | $f=0.0015$ | $\langle S^{*2} \rangle = 0.000$ |
| 126 ->129         | 0.69903   |           |           |            |                                  |
| Excited state 8:  | Singlet-A | 5.2897 eV | 234.39 nm | $f=0.0025$ | $\langle S^{*2} \rangle = 0.000$ |
| 127 ->131         | 0.56690   |           |           |            |                                  |
| 127 ->132         | 0.40048   |           |           |            |                                  |
| Excited state 9:  | Singlet-A | 5.4550 eV | 227.29 nm | $f=0.0096$ | $\langle S^{*2} \rangle = 0.000$ |
| 119 ->128         | -0.10535  |           |           |            |                                  |
| 122 ->128         | 0.11202   |           |           |            |                                  |
| 123 ->128         | 0.24893   |           |           |            |                                  |
| 123 ->129         | 0.12137   |           |           |            |                                  |
| 124 ->129         | 0.18633   |           |           |            |                                  |
| 125 ->129         | 0.54489   |           |           |            |                                  |
| 125 ->130         | -0.15500  |           |           |            |                                  |
| Excited state 10: | Singlet-A | 5.5013 eV | 225.37 nm | $f=0.0847$ | $\langle S^{*2} \rangle = 0.000$ |
| 119 ->128         | -0.11928  |           |           |            |                                  |
| 122 ->128         | 0.21476   |           |           |            |                                  |
| 123 ->128         | 0.52903   |           |           |            |                                  |
| 124 ->128         | -0.15255  |           |           |            |                                  |
| 125 ->128         | 0.15896   |           |           |            |                                  |
| 125 ->129         | -0.24651  |           |           |            |                                  |
| Excited state 11: | Singlet-A | 5.5164 eV | 224.76 nm | $f=0.0157$ | $\langle S^{*2} \rangle = 0.000$ |
| 120 ->128         | 0.11101   |           |           |            |                                  |
| 122 ->128         | 0.10481   |           |           |            |                                  |
| 124 ->128         | 0.65018   |           |           |            |                                  |
| 125 ->128         | -0.15077  |           |           |            |                                  |
| Excited state 12: | Singlet-A | 5.5408 eV | 223.76 nm | $f=0.0011$ | $\langle S^{*2} \rangle = 0.000$ |
| 127 ->131         | -0.24521  |           |           |            |                                  |
| 127 ->132         | 0.42938   |           |           |            |                                  |
| 127 ->133         | 0.27780   |           |           |            |                                  |
| 127 ->134         | -0.37195  |           |           |            |                                  |
| Excited state 13: | Singlet-A | 5.5930 eV | 221.68 nm | $f=0.0014$ | $\langle S^{*2} \rangle = 0.000$ |
| 120 ->128         | -0.17857  |           |           |            |                                  |
| 125 ->130         | -0.26783  |           |           |            |                                  |
| 126 ->130         | -0.15718  |           |           |            |                                  |
| 127 ->131         | 0.26217   |           |           |            |                                  |
| 127 ->132         | -0.27405  |           |           |            |                                  |
| 127 ->133         | 0.31172   |           |           |            |                                  |
| 127 ->134         | -0.19834  |           |           |            |                                  |
| 127 ->136         | -0.13598  |           |           |            |                                  |
| Excited state 14: | Singlet-A | 5.6103 eV | 221.00 nm | $f=0.0086$ | $\langle S^{*2} \rangle = 0.000$ |
| 120 ->128         | 0.18910   |           |           |            |                                  |
| 123 ->129         | 0.25153   |           |           |            |                                  |
| 125 ->129         | 0.14018   |           |           |            |                                  |
| 125 ->130         | 0.30009   |           |           |            |                                  |

|                   |           |           |           |            |                                  |
|-------------------|-----------|-----------|-----------|------------|----------------------------------|
| 126 ->130         | 0.19706   |           |           |            |                                  |
| 127 ->131         | 0.17978   |           |           |            |                                  |
| 127 ->132         | -0.18370  |           |           |            |                                  |
| 127 ->133         | 0.25664   |           |           |            |                                  |
| 127 ->134         | -0.20216  |           |           |            |                                  |
| Excited state 15: | Singlet-A | 5.6564 eV | 219.19 nm | $f=0.0050$ | $\langle S^{*2} \rangle = 0.000$ |
| 120 ->128         | 0.53416   |           |           |            |                                  |
| 121 ->128         | 0.14496   |           |           |            |                                  |
| 122 ->128         | -0.14797  |           |           |            |                                  |
| 123 ->129         | 0.13168   |           |           |            |                                  |
| 125 ->130         | -0.24205  |           |           |            |                                  |
| 126 ->130         | -0.20551  |           |           |            |                                  |
| Excited state 16: | Singlet-A | 5.7210 eV | 216.72 nm | $f=0.0633$ | $\langle S^{*2} \rangle = 0.000$ |
| 120 ->128         | -0.24849  |           |           |            |                                  |
| 123 ->129         | 0.58093   |           |           |            |                                  |
| 125 ->129         | -0.16624  |           |           |            |                                  |
| 126 ->130         | -0.11650  |           |           |            |                                  |
| Excited state 17: | Singlet-A | 5.7467 eV | 215.75 nm | $f=0.0002$ | $\langle S^{*2} \rangle = 0.000$ |
| 127 ->133         | 0.36968   |           |           |            |                                  |
| 127 ->134         | 0.46216   |           |           |            |                                  |
| 127 ->135         | -0.31251  |           |           |            |                                  |
| 127 ->137         | 0.15747   |           |           |            |                                  |
| Excited state 18: | Singlet-A | 5.8178 eV | 213.11 nm | $f=0.0028$ | $\langle S^{*2} \rangle = 0.000$ |
| 125 ->130         | -0.27618  |           |           |            |                                  |
| 126 ->130         | 0.59415   |           |           |            |                                  |
| 127 ->135         | 0.10288   |           |           |            |                                  |
| Excited state 19: | Singlet-A | 5.8388 eV | 212.35 nm | $f=0.0172$ | $\langle S^{*2} \rangle = 0.000$ |
| 119 ->128         | -0.11546  |           |           |            |                                  |
| 126 ->130         | -0.12332  |           |           |            |                                  |
| 127 ->132         | 0.15195   |           |           |            |                                  |
| 127 ->133         | 0.22183   |           |           |            |                                  |
| 127 ->134         | 0.15134   |           |           |            |                                  |
| 127 ->135         | 0.44560   |           |           |            |                                  |
| 127 ->136         | -0.34084  |           |           |            |                                  |
| 127 ->137         | -0.13968  |           |           |            |                                  |
| Excited state 20: | Singlet-A | 5.8548 eV | 211.76 nm | $f=0.0827$ | $\langle S^{*2} \rangle = 0.000$ |
| 118 ->128         | 0.21532   |           |           |            |                                  |
| 119 ->128         | 0.40459   |           |           |            |                                  |
| 119 ->129         | 0.12110   |           |           |            |                                  |
| 120 ->129         | -0.23907  |           |           |            |                                  |
| 122 ->128         | -0.11003  |           |           |            |                                  |
| 122 ->129         | -0.29720  |           |           |            |                                  |
| 123 ->128         | 0.19164   |           |           |            |                                  |
| 127 ->135         | 0.12509   |           |           |            |                                  |
| 127 ->136         | -0.12810  |           |           |            |                                  |
| Excited state 21: | Singlet-A | 5.9135 eV | 209.66 nm | $f=0.0601$ | $\langle S^{*2} \rangle = 0.000$ |
| 118 ->128         | 0.11638   |           |           |            |                                  |
| 119 ->128         | 0.36252   |           |           |            |                                  |
| 119 ->129         | -0.12311  |           |           |            |                                  |
| 120 ->129         | 0.14077   |           |           |            |                                  |

|                   |           |           |           |            |                                  |
|-------------------|-----------|-----------|-----------|------------|----------------------------------|
| 121 ->128         | 0.17318   |           |           |            |                                  |
| 122 ->129         | 0.47493   |           |           |            |                                  |
| Excited state 22: | Singlet-A | 5.9184 eV | 209.49 nm | $f=0.0024$ | $\langle S^{*2} \rangle = 0.000$ |
| 118 ->128         | -0.15863  |           |           |            |                                  |
| 120 ->128         | -0.15227  |           |           |            |                                  |
| 121 ->128         | 0.64560   |           |           |            |                                  |
| 122 ->129         | -0.14892  |           |           |            |                                  |
| Excited state 23: | Singlet-A | 5.9223 eV | 209.35 nm | $f=0.0192$ | $\langle S^{*2} \rangle = 0.000$ |
| 126 ->131         | 0.53396   |           |           |            |                                  |
| 126 ->132         | -0.25277  |           |           |            |                                  |
| 126 ->133         | 0.11166   |           |           |            |                                  |
| 126 ->134         | -0.10790  |           |           |            |                                  |
| 126 ->135         | 0.30359   |           |           |            |                                  |
| 126 ->137         | 0.11519   |           |           |            |                                  |
| Excited state 24: | Singlet-A | 5.9509 eV | 208.34 nm | $f=0.0156$ | $\langle S^{*2} \rangle = 0.000$ |
| 119 ->128         | 0.10897   |           |           |            |                                  |
| 127 ->133         | 0.21756   |           |           |            |                                  |
| 127 ->134         | 0.12251   |           |           |            |                                  |
| 127 ->135         | 0.28697   |           |           |            |                                  |
| 127 ->136         | 0.49539   |           |           |            |                                  |
| 127 ->137         | -0.10236  |           |           |            |                                  |
| 127 ->138         | -0.13293  |           |           |            |                                  |
| 127 ->139         | -0.15105  |           |           |            |                                  |
| 127 ->141         | -0.10262  |           |           |            |                                  |
| Excited state 25: | Singlet-A | 5.9948 eV | 206.82 nm | $f=0.0077$ | $\langle S^{*2} \rangle = 0.000$ |
| 119 ->129         | -0.18018  |           |           |            |                                  |
| 120 ->129         | 0.23686   |           |           |            |                                  |
| 123 ->129         | -0.14118  |           |           |            |                                  |
| 124 ->129         | 0.53808   |           |           |            |                                  |
| 125 ->129         | -0.16318  |           |           |            |                                  |
| 127 ->137         | 0.14007   |           |           |            |                                  |
| 127 ->141         | 0.12263   |           |           |            |                                  |
| Excited state 26: | Singlet-A | 6.0134 eV | 206.18 nm | $f=0.0099$ | $\langle S^{*2} \rangle = 0.000$ |
| 119 ->129         | 0.18223   |           |           |            |                                  |
| 120 ->129         | -0.31881  |           |           |            |                                  |
| 122 ->129         | 0.27255   |           |           |            |                                  |
| 124 ->129         | 0.36682   |           |           |            |                                  |
| 125 ->129         | -0.10676  |           |           |            |                                  |
| 127 ->135         | -0.11807  |           |           |            |                                  |
| 127 ->137         | -0.22140  |           |           |            |                                  |
| 127 ->138         | 0.10107   |           |           |            |                                  |
| 127 ->141         | -0.15543  |           |           |            |                                  |
| Excited state 27: | Singlet-A | 6.0772 eV | 204.02 nm | $f=0.0559$ | $\langle S^{*2} \rangle = 0.000$ |
| 118 ->128         | -0.20475  |           |           |            |                                  |
| 119 ->129         | 0.22637   |           |           |            |                                  |
| 120 ->129         | -0.17410  |           |           |            |                                  |
| 122 ->129         | 0.14714   |           |           |            |                                  |
| 127 ->135         | 0.10353   |           |           |            |                                  |
| 127 ->137         | 0.41367   |           |           |            |                                  |
| 127 ->138         | -0.29775  |           |           |            |                                  |
| 127 ->141         | 0.14711   |           |           |            |                                  |

Excited state 28: Singlet-A 6.0846 eV 203.77 nm  $f=0.0064$   $\langle S^{*2} \rangle=0.000$   
 127 ->134 -0.11401  
 127 ->135 0.16594  
 127 ->136 0.13354  
 127 ->137 0.28381  
 127 ->138 0.55678  
 127 ->142 0.13053

Excited state 29: Singlet-A 6.0951 eV 203.42 nm  $f=0.0274$   $\langle S^{*2} \rangle=0.000$   
 118 ->128 0.55340  
 119 ->128 -0.30450  
 121 ->128 0.12195  
 127 ->137 0.17436

Excited state 30: Singlet-A 6.1624 eV 201.19 nm  $f=0.0113$   $\langle S^{*2} \rangle=0.000$   
 119 ->129 -0.22649  
 127 ->137 0.14957  
 127 ->138 -0.12861  
 127 ->139 0.50776  
 127 ->140 -0.14431  
 127 ->141 -0.24571  
 127 ->143 0.11619

SavETr: write IOETrn= 770 NScale= 10 NData= 16 NLR=1 LETran= 520.

\*\*\*\*\*

Rotatory strengths (R) in cgs ( $10^{*-40}$  erg-esu-cm/Gauss) of **8**.

| State | XX        | YY        | ZZ       | R (length) | R (au)  |
|-------|-----------|-----------|----------|------------|---------|
| 1     | -4.5026   | 1.8332    | 0.5960   | -0.6911    | -0.0015 |
| 2     | -2.4428   | -2.1580   | 0.1126   | -1.4961    | -0.0032 |
| 3     | 1.4539    | -1.1364   | 3.0233   | 1.1136     | 0.0024  |
| 4     | 24.9651   | -877.6675 | 820.8856 | -10.6056   | -0.0225 |
| 5     | -11.1564  | 15.9800   | -11.3387 | -2.1717    | -0.0046 |
| 6     | -0.1132   | -0.1010   | -0.0044  | -0.0728    | -0.0002 |
| 7     | 227.0204  | -568.7667 | 437.295  | 31.8499    | 0.0676  |
| 8     | -1.3148   | -0.2237   | 0.0549   | -0.4945    | -0.0010 |
| 9     | -41.7647  | -18.0052  | 14.4603  | -15.1032   | -0.0320 |
| 10    | 68.5227   | -121.4929 | 24.0376  | -9.6442    | -0.0205 |
| 11    | -13.7356  | 7.1928    | -0.1327  | -2.2252    | -0.0047 |
| 12    | 0.0223    | -5.2164   | 0.1337   | -1.6868    | -0.0036 |
| 13    | -1.7717   | 2.5832    | -1.8136  | -0.3341    | -0.0007 |
| 14    | -211.2143 | 165.1495  | 4.3660   | -13.8996   | -0.0295 |
| 15    | 12.9652   | -0.9040   | 5.0419   | 5.7011     | 0.0121  |
| 16    | -0.4762   | -22.0677  | -5.4390  | -9.3276    | -0.0198 |
| 17    | -28.1435  | -54.2934  | 142.5854 | 20.0495    | 0.0425  |
| 18    | 128.6624  | -194.5182 | 89.5400  | 7.8947     | 0.0167  |
| 19    | 5.0810    | 0.6173    | 7.9972   | 4.5652     | 0.0097  |
| 20    | -128.4304 | 47.5907   | 128.1460 | 15.7688    | 0.0334  |
| 21    | 13.1186   | -3.2054   | 24.7372  | 11.5501    | 0.0245  |



|    |          |           |          |          |         |
|----|----------|-----------|----------|----------|---------|
| 22 | 5.6141   | 3.9084    | 17.6710  | 9.0645   | 0.0192  |
| 23 | -2.7064  | -55.5401  | 55.9640  | -0.7608  | -0.0016 |
| 24 | -5.8739  | 6.3858    | 6.7593   | 2.4237   | 0.0051  |
| 25 | -15.8145 | -5.1305   | -14.7363 | -11.8938 | -0.0252 |
| 26 | 2.4483   | 7.1062    | 128.6206 | 46.0584  | 0.0977  |
| 27 | 2.0109   | -170.2329 | 54.2552  | -37.9889 | -0.0806 |
| 28 | 4.0143   | 4.3094    | 41.4152  | 16.5796  | 0.0352  |
| 29 | -0.1568  | -69.9865  | 144.2730 | 24.7099  | 0.0524  |
| 30 | 0.0024   | 15.5842   | 33.4897  | 16.3587  | 0.0347  |

$1/2[ \langle 0 | \text{del} | b \rangle \langle b | r | 0 \rangle + (\langle 0 | r | b \rangle \langle b | \text{del} | 0 \rangle)^* ]$  (Au)

| State | X       | Y       | Z       | Dip. S. | Osc.(frdel) |
|-------|---------|---------|---------|---------|-------------|
| 1     | 0.0000  | 0.0000  | 0.0000  | 0.0001  | 0.0000      |
| 2     | -0.0025 | -0.0011 | 0.0000  | 0.0036  | 0.0024      |
| 3     | -0.0018 | 0.0000  | -0.0003 | 0.0021  | 0.0014      |
| 4     | -0.0197 | -0.0356 | -0.2854 | 0.3407  | 0.2271      |
| 5     | -0.0059 | -0.0004 | -0.0004 | 0.0067  | 0.0045      |
| 6     | -0.0001 | 0.0000  | 0.0000  | 0.0001  | 0.0001      |
| 7     | -0.2042 | -0.0466 | -0.0305 | 0.2813  | 0.1875      |
| 8     | -0.0009 | -0.0002 | 0.0000  | 0.0011  | 0.0007      |
| 9     | -0.0074 | -0.0015 | -0.0005 | 0.0095  | 0.0063      |
| 10    | -0.0445 | -0.0138 | -0.0004 | 0.0586  | 0.0391      |
| 11    | -0.0194 | -0.0036 | 0.0000  | 0.0230  | 0.0154      |
| 12    | 0.0000  | -0.0005 | 0.0000  | 0.0006  | 0.0004      |
| 13    | -0.0084 | -0.0003 | -0.0007 | 0.0095  | 0.0063      |
| 14    | -0.1830 | -0.0969 | -0.0005 | 0.2804  | 0.1869      |
| 15    | -0.0090 | -0.0006 | -0.0001 | 0.0096  | 0.0064      |
| 16    | 0.0000  | -0.0020 | -0.0003 | 0.0023  | 0.0015      |
| 17    | -0.0046 | -0.0406 | -0.0151 | 0.0604  | 0.0403      |
| 18    | -0.0216 | -0.0425 | -0.0079 | 0.0721  | 0.0480      |
| 19    | -0.0046 | -0.0009 | -0.0008 | 0.0064  | 0.0042      |
| 20    | -0.2110 | -0.0022 | -0.0183 | 0.2315  | 0.1543      |
| 21    | -0.0047 | -0.0010 | -0.0025 | 0.0083  | 0.0055      |
| 22    | -0.0128 | -0.0003 | -0.0030 | 0.0161  | 0.0107      |
| 23    | -0.0003 | -0.0121 | -0.0077 | 0.0201  | 0.0134      |
| 24    | -0.0077 | -0.0013 | -0.0007 | 0.0097  | 0.0065      |
| 25    | -0.0433 | -0.0931 | -0.0001 | 0.1366  | 0.0910      |
| 26    | -0.0001 | -0.0025 | -0.0248 | 0.0274  | 0.0183      |
| 27    | -0.0004 | -0.0084 | -0.0133 | 0.0221  | 0.0147      |
| 28    | -0.0001 | 0.0000  | -0.0059 | 0.0060  | 0.0040      |
| 29    | -0.0023 | -0.0015 | -0.0450 | 0.0487  | 0.0325      |
| 30    | 0.0000  | -0.0017 | -0.0101 | 0.0118  | 0.0078      |

Ground to Excited state transition densities written to RWF 633

Excitation energies and oscillator strengths:

Excited state 1: Singlet-A 3.5564 eV 348.62 nm  $f=0.0000$   $\langle S^{*2} \rangle=0.000$   
 130  $\rightarrow$  132 0.70000

This state for optimization and/or second-order correction.

Copying the Excited state density for this state as the 1-particle RhoCI density.

Excited state 2: Singlet-A 4.1487 eV 298.85 nm  $f=0.0024$   $\langle S^{*2} \rangle=0.000$   
 131  $\rightarrow$  133 0.70311

Excited state 3: Singlet-A 4.2009 eV 295.13 nm  $f=0.0014$   $\langle S^{*2} \rangle=0.000$   
 131  $\rightarrow$  132 0.70645

Excited state 4: Singlet-A 4.5780 eV 270.83 nm  $f=0.2278$   $\langle S^{*2} \rangle=0.000$   
 128  $\rightarrow$  132 0.11292  
 129  $\rightarrow$  132 0.68474

Excited state 5: Singlet-A 4.7912 eV 258.77 nm  $f=0.0044$   $\langle S^{*2} \rangle=0.000$   
 123  $\rightarrow$  133 0.15628  
 124  $\rightarrow$  133 0.56372  
 126  $\rightarrow$  133 0.11178  
 127  $\rightarrow$  133 0.31422

Excited state 6: Singlet-A 4.9116 eV 252.43 nm  $f=0.0001$   $\langle S^{*2} \rangle=0.000$   
 130  $\rightarrow$  133 0.70671

Excited state 7: Singlet-A 4.9580 eV 250.07 nm  $f=0.1929$   $\langle S^{*2} \rangle=0.000$   
 128  $\rightarrow$  132 0.68027  
 129  $\rightarrow$  132 -0.10621

Excited state 8: Singlet-A 4.9995 eV 247.99 nm  $f=0.0007$   $\langle S^{*2} \rangle=0.000$   
 129  $\rightarrow$  133 0.69645

Excited state 9: Singlet-A 5.1590 eV 240.32 nm  $f=0.0063$   $\langle S^{*2} \rangle=0.000$   
 125  $\rightarrow$  134 0.12000  
 131  $\rightarrow$  134 0.65568  
 131  $\rightarrow$  135 -0.12373

Excited state 10: Singlet-A 5.2895 eV 234.40 nm  $f=0.0404$   $\langle S^{*2} \rangle=0.000$   
 125  $\rightarrow$  132 0.22031  
 126  $\rightarrow$  132 -0.34055  
 127  $\rightarrow$  132 0.56345

Excited state 11: Singlet-A 5.3139 eV 233.32 nm  $f=0.0156$   $\langle S^{*2} \rangle=0.000$   
 124  $\rightarrow$  133 -0.10688  
 126  $\rightarrow$  133 -0.20271  
 127  $\rightarrow$  133 0.13339  
 128  $\rightarrow$  133 0.64603

Excited state 12: Singlet-A 5.4520 eV 227.41 nm  $f=0.0004$   $\langle S^{*2} \rangle=0.000$   
 126  $\rightarrow$  132 0.60138  
 127  $\rightarrow$  132 0.35298

Excited state 13: Singlet-A 5.4963 eV 225.58 nm  $f=0.0064$   $\langle S^{*2} \rangle=0.000$   
 125  $\rightarrow$  133 0.11396  
 126  $\rightarrow$  133 0.55653  
 127  $\rightarrow$  133 -0.33582

|                   |           |           |           |            |                                   |  |
|-------------------|-----------|-----------|-----------|------------|-----------------------------------|--|
| 128 ->133         | 0.24500   |           |           |            |                                   |  |
| Excited state 14: | Singlet-A | 5.5287 eV | 224.25 nm | $f=0.1892$ | $\langle S^{**2} \rangle = 0.000$ |  |
| 124 ->133         | -0.31810  |           |           |            |                                   |  |
| 125 ->133         | 0.20480   |           |           |            |                                   |  |
| 126 ->133         | 0.25438   |           |           |            |                                   |  |
| 127 ->133         | 0.41607   |           |           |            |                                   |  |
| 131 ->135         | 0.28415   |           |           |            |                                   |  |
| Excited state 15: | Singlet-A | 5.5546 eV | 223.21 nm | $f=0.0066$ | $\langle S^{**2} \rangle = 0.000$ |  |
| 124 ->132         | -0.17545  |           |           |            |                                   |  |
| 125 ->132         | 0.63053   |           |           |            |                                   |  |
| 127 ->132         | -0.22888  |           |           |            |                                   |  |
| Excited state 16: | Singlet-A | 5.5692 eV | 222.62 nm | $f=0.0018$ | $\langle S^{**2} \rangle = 0.000$ |  |
| 130 ->135         | 0.29969   |           |           |            |                                   |  |
| 130 ->136         | 0.61883   |           |           |            |                                   |  |
| Excited state 17: | Singlet-A | 5.6088 eV | 221.05 nm | $f=0.0411$ | $\langle S^{**2} \rangle = 0.000$ |  |
| 124 ->133         | 0.11611   |           |           |            |                                   |  |
| 125 ->133         | -0.18698  |           |           |            |                                   |  |
| 125 ->134         | 0.19924   |           |           |            |                                   |  |
| 126 ->134         | -0.10815  |           |           |            |                                   |  |
| 127 ->133         | -0.13307  |           |           |            |                                   |  |
| 127 ->134         | 0.13192   |           |           |            |                                   |  |
| 128 ->134         | 0.15090   |           |           |            |                                   |  |
| 129 ->134         | -0.19263  |           |           |            |                                   |  |
| 131 ->135         | 0.50311   |           |           |            |                                   |  |
| Excited state 18: | Singlet-A | 5.6336 eV | 220.08 nm | $f=0.0478$ | $\langle S^{**2} \rangle = 0.000$ |  |
| 125 ->134         | -0.26549  |           |           |            |                                   |  |
| 126 ->134         | 0.16644   |           |           |            |                                   |  |
| 127 ->134         | -0.19218  |           |           |            |                                   |  |
| 128 ->134         | -0.21607  |           |           |            |                                   |  |
| 129 ->134         | 0.28914   |           |           |            |                                   |  |
| 131 ->134         | 0.23129   |           |           |            |                                   |  |
| 131 ->135         | 0.29509   |           |           |            |                                   |  |
| Excited state 19: | Singlet-A | 5.6869 eV | 218.02 nm | $f=0.0043$ | $\langle S^{**2} \rangle = 0.000$ |  |
| 122 ->132         | -0.11399  |           |           |            |                                   |  |
| 123 ->132         | -0.29634  |           |           |            |                                   |  |
| 124 ->132         | 0.58933   |           |           |            |                                   |  |
| 125 ->132         | 0.17725   |           |           |            |                                   |  |
| Excited state 20: | Singlet-A | 5.7213 eV | 216.70 nm | $f=0.1562$ | $\langle S^{**2} \rangle = 0.000$ |  |
| 125 ->133         | 0.61781   |           |           |            |                                   |  |
| 126 ->133         | -0.21205  |           |           |            |                                   |  |
| 127 ->133         | -0.18300  |           |           |            |                                   |  |
| Excited state 21: | Singlet-A | 5.7912 eV | 214.09 nm | $f=0.0056$ | $\langle S^{**2} \rangle = 0.000$ |  |
| 121 ->132         | 0.18201   |           |           |            |                                   |  |
| 122 ->132         | 0.24985   |           |           |            |                                   |  |
| 123 ->132         | 0.51498   |           |           |            |                                   |  |
| 124 ->132         | 0.34004   |           |           |            |                                   |  |
| Excited state 22: | Singlet-A | 5.8416 eV | 212.24 nm | $f=0.0108$ | $\langle S^{**2} \rangle = 0.000$ |  |
| 131 ->135         | 0.14554   |           |           |            |                                   |  |

|                   |           |           |           |            |                                  |
|-------------------|-----------|-----------|-----------|------------|----------------------------------|
| 131 ->136         | 0.68291   |           |           |            |                                  |
| Excited state 23: | Singlet-A | 5.9796 eV | 207.35 nm | $f=0.0135$ | $\langle S^{*2} \rangle = 0.000$ |
| 121 ->133         | -0.29456  |           |           |            |                                  |
| 123 ->133         | 0.56890   |           |           |            |                                  |
| 124 ->133         | -0.14839  |           |           |            |                                  |
| 130 ->134         | -0.14402  |           |           |            |                                  |
| Excited state 24: | Singlet-A | 5.9817 eV | 207.27 nm | $f=0.0065$ | $\langle S^{*2} \rangle = 0.000$ |
| 123 ->133         | 0.12792   |           |           |            |                                  |
| 129 ->134         | 0.13848   |           |           |            |                                  |
| 130 ->134         | 0.65748   |           |           |            |                                  |
| 130 ->136         | 0.11813   |           |           |            |                                  |
| Excited state 25: | Singlet-A | 6.0243 eV | 205.81 nm | $f=0.0910$ | $\langle S^{*2} \rangle = 0.000$ |
| 122 ->133         | -0.14325  |           |           |            |                                  |
| 131 ->135         | 0.11310   |           |           |            |                                  |
| 131 ->137         | 0.50767   |           |           |            |                                  |
| 131 ->138         | -0.37711  |           |           |            |                                  |
| 131 ->140         | -0.12993  |           |           |            |                                  |
| Excited state 26: | Singlet-A | 6.0742 eV | 204.11 nm | $f=0.0184$ | $\langle S^{*2} \rangle = 0.000$ |
| 120 ->133         | 0.11660   |           |           |            |                                  |
| 121 ->132         | -0.14822  |           |           |            |                                  |
| 121 ->133         | -0.31788  |           |           |            |                                  |
| 122 ->133         | 0.50596   |           |           |            |                                  |
| 123 ->133         | -0.11761  |           |           |            |                                  |
| 127 ->133         | 0.10510   |           |           |            |                                  |
| 131 ->138         | -0.11011  |           |           |            |                                  |
| Excited state 27: | Singlet-A | 6.0802 eV | 203.91 nm | $f=0.0151$ | $\langle S^{*2} \rangle = 0.000$ |
| 116 ->132         | 0.16599   |           |           |            |                                  |
| 118 ->132         | -0.21380  |           |           |            |                                  |
| 120 ->132         | -0.13325  |           |           |            |                                  |
| 121 ->132         | 0.50048   |           |           |            |                                  |
| 122 ->132         | 0.10667   |           |           |            |                                  |
| 122 ->133         | 0.15192   |           |           |            |                                  |
| 123 ->132         | -0.14465  |           |           |            |                                  |
| 129 ->135         | 0.15991   |           |           |            |                                  |
| 129 ->136         | 0.17027   |           |           |            |                                  |
| Excited state 28: | Singlet-A | 6.0948 eV | 203.43 nm | $f=0.0040$ | $\langle S^{*2} \rangle = 0.000$ |
| 121 ->132         | 0.14385   |           |           |            |                                  |
| 125 ->134         | 0.16603   |           |           |            |                                  |
| 126 ->134         | -0.11223  |           |           |            |                                  |
| 127 ->134         | 0.14124   |           |           |            |                                  |
| 128 ->134         | 0.21548   |           |           |            |                                  |
| 129 ->134         | 0.50320   |           |           |            |                                  |
| 129 ->135         | -0.23186  |           |           |            |                                  |
| 130 ->134         | -0.11955  |           |           |            |                                  |
| Excited state 29: | Singlet-A | 6.1271 eV | 202.35 nm | $f=0.0328$ | $\langle S^{*2} \rangle = 0.000$ |
| 121 ->132         | -0.13155  |           |           |            |                                  |
| 126 ->135         | 0.10752   |           |           |            |                                  |
| 128 ->135         | -0.15056  |           |           |            |                                  |
| 129 ->134         | 0.27727   |           |           |            |                                  |
| 129 ->135         | 0.47745   |           |           |            |                                  |

129 ->136 0.26901

Excited state 30: Singlet-A 6.1426 eV 201.84 nm  $f=0.0078$   $\langle S^{*2} \rangle=0.000$   
131 ->137 -0.25510  
131 ->138 -0.40013  
131 ->139 0.47367  
131 ->140 0.11540

SavETr: write IOETrn= 770 NScale= 10 NData= 16 NLR=1 LETran= 520.

\*\*\*\*\*

Rotatory strengths (R) in cgs ( $10^{*-40}$  erg-esu-cm/Gauss) of **11**.

| State | XX        | YY       | ZZ        | R (length) | R (au)  |
|-------|-----------|----------|-----------|------------|---------|
| 1     | 17.7353   | 11.3644  | -17.7552  | 3.7815     | 0.0080  |
| 2     | 0.3493    | 0.0676   | 0.2441    | 0.2203     | 0.0005  |
| 3     | -14.7864  | 36.1357  | -27.1233  | -1.9246    | -0.0041 |
| 4     | 1.4528    | -0.1245  | -1.7599   | -0.1439    | -0.0003 |
| 5     | 3.2828    | 4.7088   | -8.9594   | -0.3226    | -0.0007 |
| 6     | 1.0591    | -2.8369  | -14.0010  | -5.2596    | -0.0112 |
| 7     | -68.7493  | 71.4656  | -93.6148  | -30.2995   | -0.0643 |
| 8     | -5.0958   | 55.2534  | 16.1525   | 22.1034    | 0.0469  |
| 9     | 318.3316  | 501.4355 | -761.8752 | 19.2973    | 0.0409  |
| 10    | -0.6961   | -0.0738  | -5.0513   | -1.9404    | -0.0041 |
| 11    | -15.4272  | -16.0463 | -19.5112  | -16.9949   | -0.0360 |
| 12    | -14.6802  | -11.0076 | 2.0878    | -7.8667    | -0.0167 |
| 13    | -1.7377   | -99.9648 | 98.0964   | -1.2020    | -0.0025 |
| 14    | -78.8341  | -36.1953 | 30.7585   | -28.0903   | -0.0596 |
| 15    | -17.9870  | -10.7889 | -20.2772  | -16.3510   | -0.0347 |
| 16    | -20.1039  | -15.3715 | 40.0187   | 1.5144     | 0.0032  |
| 17    | 12.3821   | -2.9989  | 30.6819   | 13.3551    | 0.0283  |
| 18    | -18.8581  | 25.9828  | -11.8967  | -1.5907    | -0.0034 |
| 19    | 5.2086    | 8.2546   | -37.8755  | -8.1374    | -0.0173 |
| 20    | -22.8007  | 9.0565   | -59.0127  | -24.2523   | -0.0514 |
| 21    | -11.5824  | 43.5986  | 5.9296    | 12.6486    | 0.0268  |
| 22    | -13.8811  | 39.4704  | 53.2760   | 26.2884    | 0.0558  |
| 23    | -9.4082   | 135.3819 | -41.9519  | 28.0073    | 0.0594  |
| 24    | -1.9073   | 1.2132   | 5.8834    | 1.7297     | 0.0037  |
| 25    | -0.2540   | 8.5163   | -15.6758  | -2.4712    | -0.0052 |
| 26    | -100.3348 | 59.3953  | 41.3783   | 0.1463     | 0.0003  |
| 27    | 15.8835   | 6.8690   | -4.5016   | 6.0836     | 0.0129  |
| 28    | -12.7013  | 42.9019  | 13.2268   | 14.4758    | 0.0307  |
| 29    | -76.4229  | 40.6022  | -23.3717  | -19.7308   | -0.0419 |
| 30    | -82.3761  | 32.2764  | -147.4097 | -65.8365   | -0.1396 |

$1/2[\langle 0|\text{del}b\rangle\langle b|r|0\rangle + (\langle 0|r|b\rangle\langle b|\text{del}0\rangle)^*]$  (Au)

| State | X       | Y       | Z       | Dip. S. | Osc.(frdel) |
|-------|---------|---------|---------|---------|-------------|
| 1     | -0.0041 | -0.0047 | -0.0094 | 0.0181  | 0.0121      |

|    |         |         |         |        |        |
|----|---------|---------|---------|--------|--------|
| 2  | 0.0000  | -0.0001 | -0.0002 | 0.0003 | 0.0002 |
| 3  | -0.0008 | -0.0036 | -0.0013 | 0.0057 | 0.0038 |
| 4  | -0.0003 | -0.0005 | -0.0002 | 0.0009 | 0.0006 |
| 5  | -0.0011 | -0.0027 | -0.0010 | 0.0049 | 0.0033 |
| 6  | -0.0004 | 0.0000  | -0.0089 | 0.0093 | 0.0062 |
| 7  | -0.0077 | -0.0281 | -0.1326 | 0.1684 | 0.1123 |
| 8  | -0.0038 | -0.0050 | -0.0155 | 0.0242 | 0.0162 |
| 9  | -0.1144 | -0.2541 | -0.0649 | 0.4334 | 0.2889 |
| 10 | 0.0000  | -0.0027 | -0.0003 | 0.0030 | 0.0020 |
| 11 | -0.0046 | -0.0015 | -0.0097 | 0.0157 | 0.0105 |
| 12 | -0.0032 | -0.0034 | -0.0022 | 0.0088 | 0.0059 |
| 13 | -0.0001 | -0.0075 | -0.0876 | 0.0951 | 0.0634 |
| 14 | -0.0078 | -0.0479 | -0.0008 | 0.0566 | 0.0377 |
| 15 | -0.0240 | -0.0097 | -0.0009 | 0.0345 | 0.0230 |
| 16 | -0.0029 | -0.0026 | -0.0015 | 0.0070 | 0.0047 |
| 17 | -0.0142 | 0.0000  | -0.0074 | 0.0217 | 0.0145 |
| 18 | -0.0036 | -0.0066 | -0.0044 | 0.0145 | 0.0097 |
| 19 | -0.0002 | -0.0072 | -0.0042 | 0.0116 | 0.0077 |
| 20 | -0.0039 | -0.0005 | -0.0284 | 0.0328 | 0.0219 |
| 21 | -0.0273 | -0.0022 | -0.0136 | 0.0431 | 0.0287 |
| 22 | -0.0073 | -0.0108 | -0.0041 | 0.0223 | 0.0148 |
| 23 | -0.0331 | -0.0478 | -0.0005 | 0.0814 | 0.0543 |
| 24 | -0.0012 | -0.0027 | -0.0007 | 0.0045 | 0.0030 |
| 25 | -0.0002 | -0.0009 | -0.0024 | 0.0035 | 0.0023 |
| 26 | -0.0140 | -0.0203 | -0.0010 | 0.0354 | 0.0236 |
| 27 | -0.0121 | -0.0043 | -0.0023 | 0.0188 | 0.0125 |
| 28 | -0.0021 | -0.0086 | -0.0003 | 0.0111 | 0.0074 |
| 29 | -0.0294 | -0.0115 | -0.0004 | 0.0413 | 0.0275 |
| 30 | -0.0514 | -0.0343 | -0.0048 | 0.0906 | 0.0604 |

Ground to Excited state transition densities written to RWF 633

Excitation energies and oscillator strengths:

Excited state 1: Singlet-A 4.3130 eV 287.47 nm  $f=0.0123$   $\langle S^{*2} \rangle=0.000$   
125 -> 133 -0.12029  
131 -> 133 0.65430  
132 -> 133 0.22532

This state for optimization and/or second-order correction.

Copying the Excited state density for this state as the 1-particle RhoCI density.

Excited state 2: Singlet-A 4.5058 eV 275.16 nm  $f=0.0002$   $\langle S^{*2} \rangle=0.000$   
131 -> 133 -0.22038  
132 -> 133 0.67012

Excited state 3: Singlet-A 4.7974 eV 258.44 nm  $f=0.0037$   $\langle S^{*2} \rangle=0.000$   
125 -> 133 0.62681  
128 -> 133 -0.14390

|                   |           |           |           |            |                                  |
|-------------------|-----------|-----------|-----------|------------|----------------------------------|
| 129 -> 133        | -0.16260  |           |           |            |                                  |
| 131 -> 133        | 0.14529   |           |           |            |                                  |
| Excited state 4:  | Singlet-A | 5.2234 eV | 237.36 nm | $f=0.0006$ | $\langle S^{*2} \rangle = 0.000$ |
| 125 -> 133        | -0.13078  |           |           |            |                                  |
| 129 -> 133        | -0.19282  |           |           |            |                                  |
| 130 -> 133        | 0.66124   |           |           |            |                                  |
| Excited state 5:  | Singlet-A | 5.3573 eV | 231.43 nm | $f=0.0033$ | $\langle S^{*2} \rangle = 0.000$ |
| 125 -> 133        | 0.11214   |           |           |            |                                  |
| 129 -> 133        | 0.64578   |           |           |            |                                  |
| 130 -> 133        | 0.22754   |           |           |            |                                  |
| Excited state 6:  | Singlet-A | 5.4329 eV | 228.21 nm | $f=0.0059$ | $\langle S^{*2} \rangle = 0.000$ |
| 126 -> 135        | -0.10966  |           |           |            |                                  |
| 129 -> 134        | -0.23433  |           |           |            |                                  |
| 129 -> 135        | -0.22035  |           |           |            |                                  |
| 130 -> 134        | 0.16356   |           |           |            |                                  |
| 130 -> 135        | 0.14484   |           |           |            |                                  |
| 131 -> 134        | 0.12968   |           |           |            |                                  |
| 132 -> 134        | 0.46699   |           |           |            |                                  |
| 132 -> 135        | 0.23726   |           |           |            |                                  |
| Excited state 7:  | Singlet-A | 5.5527 eV | 223.29 nm | $f=0.1140$ | $\langle S^{*2} \rangle = 0.000$ |
| 128 -> 133        | -0.21286  |           |           |            |                                  |
| 129 -> 134        | 0.16525   |           |           |            |                                  |
| 129 -> 135        | 0.20183   |           |           |            |                                  |
| 130 -> 134        | -0.12675  |           |           |            |                                  |
| 130 -> 135        | -0.14259  |           |           |            |                                  |
| 131 -> 134        | 0.49175   |           |           |            |                                  |
| 131 -> 135        | 0.15889   |           |           |            |                                  |
| 132 -> 134        | 0.16581   |           |           |            |                                  |
| Excited state 8:  | Singlet-A | 5.5620 eV | 222.91 nm | $f=0.0161$ | $\langle S^{*2} \rangle = 0.000$ |
| 129 -> 134        | 0.20331   |           |           |            |                                  |
| 129 -> 135        | 0.19260   |           |           |            |                                  |
| 130 -> 134        | -0.13247  |           |           |            |                                  |
| 130 -> 135        | -0.12699  |           |           |            |                                  |
| 131 -> 134        | -0.31926  |           |           |            |                                  |
| 131 -> 135        | -0.18966  |           |           |            |                                  |
| 132 -> 134        | 0.44811   |           |           |            |                                  |
| Excited state 9:  | Singlet-A | 5.6073 eV | 221.11 nm | $f=0.2918$ | $\langle S^{*2} \rangle = 0.000$ |
| 124 -> 133        | -0.18257  |           |           |            |                                  |
| 125 -> 133        | 0.17024   |           |           |            |                                  |
| 128 -> 133        | 0.55132   |           |           |            |                                  |
| 131 -> 134        | 0.15475   |           |           |            |                                  |
| 131 -> 135        | 0.24890   |           |           |            |                                  |
| Excited state 10: | Singlet-A | 5.6657 eV | 218.83 nm | $f=0.0020$ | $\langle S^{*2} \rangle = 0.000$ |
| 126 -> 133        | 0.50378   |           |           |            |                                  |
| 127 -> 133        | -0.46708  |           |           |            |                                  |
| 128 -> 133        | -0.11142  |           |           |            |                                  |
| Excited state 11: | Singlet-A | 5.7431 eV | 215.88 nm | $f=0.0104$ | $\langle S^{*2} \rangle = 0.000$ |
| 126 -> 133        | 0.30819   |           |           |            |                                  |
| 127 -> 133        | 0.33840   |           |           |            |                                  |

|                   |           |           |           |            |                                  |
|-------------------|-----------|-----------|-----------|------------|----------------------------------|
| 131 -> 135        | 0.14689   |           |           |            |                                  |
| 132 -> 134        | -0.14219  |           |           |            |                                  |
| 132 -> 135        | 0.45752   |           |           |            |                                  |
| Excited state 12: | Singlet-A | 5.7492 eV | 215.66 nm | $f=0.0059$ | $\langle S^{*2} \rangle = 0.000$ |
| 126 -> 133        | -0.35732  |           |           |            |                                  |
| 127 -> 133        | -0.38418  |           |           |            |                                  |
| 132 -> 134        | -0.13479  |           |           |            |                                  |
| 132 -> 135        | 0.41676   |           |           |            |                                  |
| Excited state 13: | Singlet-A | 5.8217 eV | 212.97 nm | $f=0.0641$ | $\langle S^{*2} \rangle = 0.000$ |
| 128 -> 133        | -0.16537  |           |           |            |                                  |
| 131 -> 134        | -0.27243  |           |           |            |                                  |
| 131 -> 135        | 0.55697   |           |           |            |                                  |
| 132 -> 135        | -0.16305  |           |           |            |                                  |
| 132 -> 136        | -0.10948  |           |           |            |                                  |
| Excited state 14: | Singlet-A | 5.8571 eV | 211.68 nm | $f=0.0373$ | $\langle S^{*2} \rangle = 0.000$ |
| 122 -> 133        | 0.10147   |           |           |            |                                  |
| 123 -> 133        | -0.27239  |           |           |            |                                  |
| 124 -> 133        | 0.56720   |           |           |            |                                  |
| 128 -> 133        | 0.19990   |           |           |            |                                  |
| 131 -> 135        | 0.11707   |           |           |            |                                  |
| Excited state 15: | Singlet-A | 5.9089 eV | 209.83 nm | $f=0.0235$ | $\langle S^{*2} \rangle = 0.000$ |
| 132 -> 135        | -0.13404  |           |           |            |                                  |
| 132 -> 136        | 0.58891   |           |           |            |                                  |
| 132 -> 139        | 0.13226   |           |           |            |                                  |
| 132 -> 140        | -0.22386  |           |           |            |                                  |
| 132 -> 143        | -0.11536  |           |           |            |                                  |
| Excited state 16: | Singlet-A | 6.1062 eV | 203.05 nm | $f=0.0048$ | $\langle S^{*2} \rangle = 0.000$ |
| 126 -> 134        | -0.26656  |           |           |            |                                  |
| 127 -> 134        | 0.15619   |           |           |            |                                  |
| 129 -> 134        | 0.36350   |           |           |            |                                  |
| 129 -> 135        | -0.28565  |           |           |            |                                  |
| 130 -> 134        | -0.28454  |           |           |            |                                  |
| 130 -> 135        | 0.18304   |           |           |            |                                  |
| 131 -> 136        | -0.14995  |           |           |            |                                  |
| 131 -> 137        | -0.10753  |           |           |            |                                  |
| Excited state 17: | Singlet-A | 6.1536 eV | 201.48 nm | $f=0.0145$ | $\langle S^{*2} \rangle = 0.000$ |
| 121 -> 133        | 0.18273   |           |           |            |                                  |
| 123 -> 133        | -0.34833  |           |           |            |                                  |
| 124 -> 133        | -0.16215  |           |           |            |                                  |
| 131 -> 136        | 0.45741   |           |           |            |                                  |
| 131 -> 138        | 0.16397   |           |           |            |                                  |
| 132 -> 136        | 0.10833   |           |           |            |                                  |
| 132 -> 138        | 0.12054   |           |           |            |                                  |
| Excited state 18: | Singlet-A | 6.1581 eV | 201.34 nm | $f=0.0097$ | $\langle S^{*2} \rangle = 0.000$ |
| 121 -> 133        | -0.25283  |           |           |            |                                  |
| 122 -> 133        | 0.10248   |           |           |            |                                  |
| 123 -> 133        | 0.44824   |           |           |            |                                  |
| 124 -> 133        | 0.15665   |           |           |            |                                  |
| 131 -> 136        | 0.35365   |           |           |            |                                  |
| 131 -> 138        | 0.12705   |           |           |            |                                  |



|                   |           |           |           |            |                                   |
|-------------------|-----------|-----------|-----------|------------|-----------------------------------|
| Excited state 19: | Singlet-A | 6.2065 eV | 199.77 nm | $f=0.0078$ | $\langle S^{**2} \rangle = 0.000$ |
| 121 -> 133        | -0.31102  |           |           |            |                                   |
| 122 -> 133        | 0.46899   |           |           |            |                                   |
| 123 -> 133        | -0.20287  |           |           |            |                                   |
| 124 -> 133        | -0.22973  |           |           |            |                                   |
| 131 -> 137        | 0.17353   |           |           |            |                                   |
| Excited state 20: | Singlet-A | 6.2250 eV | 199.17 nm | $f=0.0223$ | $\langle S^{**2} \rangle = 0.000$ |
| 122 -> 133        | 0.11486   |           |           |            |                                   |
| 131 -> 136        | -0.26664  |           |           |            |                                   |
| 131 -> 137        | -0.18913  |           |           |            |                                   |
| 132 -> 136        | 0.17998   |           |           |            |                                   |
| 132 -> 137        | -0.21181  |           |           |            |                                   |
| 132 -> 138        | 0.32265   |           |           |            |                                   |
| 132 -> 140        | 0.29323   |           |           |            |                                   |
| 132 -> 141        | 0.22503   |           |           |            |                                   |
| Excited state 21: | Singlet-A | 6.2337 eV | 198.89 nm | $f=0.0288$ | $\langle S^{**2} \rangle = 0.000$ |
| 122 -> 133        | -0.10148  |           |           |            |                                   |
| 131 -> 137        | 0.52875   |           |           |            |                                   |
| 131 -> 138        | -0.17833  |           |           |            |                                   |
| 132 -> 136        | 0.14115   |           |           |            |                                   |
| 132 -> 137        | 0.15560   |           |           |            |                                   |
| 132 -> 138        | 0.13272   |           |           |            |                                   |
| 132 -> 140        | 0.19902   |           |           |            |                                   |
| 132 -> 141        | 0.14697   |           |           |            |                                   |
| Excited state 22: | Singlet-A | 6.2859 eV | 197.24 nm | $f=0.0152$ | $\langle S^{**2} \rangle = 0.000$ |
| 129 -> 134        | 0.35940   |           |           |            |                                   |
| 130 -> 134        | 0.56303   |           |           |            |                                   |
| 130 -> 135        | 0.11489   |           |           |            |                                   |
| Excited state 23: | Singlet-A | 6.3129 eV | 196.40 nm | $f=0.0548$ | $\langle S^{**2} \rangle = 0.000$ |
| 132 -> 137        | 0.31429   |           |           |            |                                   |
| 132 -> 138        | 0.24228   |           |           |            |                                   |
| 132 -> 139        | 0.48475   |           |           |            |                                   |
| 132 -> 140        | 0.10081   |           |           |            |                                   |
| 132 -> 141        | -0.11515  |           |           |            |                                   |
| 132 -> 142        | -0.19429  |           |           |            |                                   |
| Excited state 24: | Singlet-A | 6.3299 eV | 195.87 nm | $f=0.0030$ | $\langle S^{**2} \rangle = 0.000$ |
| 121 -> 133        | 0.49160   |           |           |            |                                   |
| 122 -> 133        | 0.44421   |           |           |            |                                   |
| 123 -> 133        | 0.17897   |           |           |            |                                   |
| Excited state 25: | Singlet-A | 6.3729 eV | 194.55 nm | $f=0.0024$ | $\langle S^{**2} \rangle = 0.000$ |
| 131 -> 137        | -0.23217  |           |           |            |                                   |
| 132 -> 136        | 0.15833   |           |           |            |                                   |
| 132 -> 137        | 0.50704   |           |           |            |                                   |
| 132 -> 138        | -0.14231  |           |           |            |                                   |
| 132 -> 139        | -0.16588  |           |           |            |                                   |
| 132 -> 141        | 0.15595   |           |           |            |                                   |
| 132 -> 142        | 0.20689   |           |           |            |                                   |
| 132 -> 143        | 0.14967   |           |           |            |                                   |
| Excited state 26: | Singlet-A | 6.4034 eV | 193.62 nm | $f=0.0241$ | $\langle S^{**2} \rangle = 0.000$ |

|                   |               |           |            |            |                                  |
|-------------------|---------------|-----------|------------|------------|----------------------------------|
| 130 -> 136        | -0.10877      |           |            |            |                                  |
| 131 -> 136        | -0.15435      |           |            |            |                                  |
| 131 -> 137        | 0.11567       |           |            |            |                                  |
| 131 -> 138        | 0.40650       |           |            |            |                                  |
| 132 -> 137        | 0.10969       |           |            |            |                                  |
| 132 -> 138        | 0.32874       |           |            |            |                                  |
| 132 -> 139        | -0.19834      |           |            |            |                                  |
| 132 -> 140        | -0.25857      |           |            |            |                                  |
| 132 -> 142        | 0.10332       |           |            |            |                                  |
|                   |               |           |            |            |                                  |
| Excited state 27: | Singlet-A     | 6.4429 eV | 192.43 nm  | $f=0.0126$ | $\langle S^{*2} \rangle = 0.000$ |
| 117 -> 133        | -0.11714      |           |            |            |                                  |
| 119 -> 133        | -0.19570      |           |            |            |                                  |
| 120 -> 133        | 0.62101       |           |            |            |                                  |
| 131 -> 139        | 0.11294       |           |            |            |                                  |
|                   |               |           |            |            |                                  |
| Excited state 28: | Singlet-A     | 6.4490 eV | 192.25 nm  | $f=0.0074$ | $\langle S^{*2} \rangle = 0.000$ |
| 120 -> 133        | -0.13789      |           |            |            |                                  |
| 126 -> 134        | 0.11099       |           |            |            |                                  |
| 130 -> 135        | 0.20544       |           |            |            |                                  |
| 131 -> 137        | 0.14935       |           |            |            |                                  |
| 131 -> 138        | 0.34492       |           |            |            |                                  |
| 131 -> 139        | 0.34877       |           |            |            |                                  |
| 131 -> 140        | 0.22755       |           |            |            |                                  |
| 132 -> 138        | -0.16883      |           |            |            |                                  |
| 132 -> 140        | 0.16297       |           |            |            |                                  |
|                   |               |           |            |            |                                  |
| Excited state 29: | Singlet-A     | 6.4686 eV | 191.67 nm  | $f=0.0278$ | $\langle S^{*2} \rangle = 0.000$ |
| 126 -> 134        | -0.17265      |           |            |            |                                  |
| 127 -> 134        | 0.12258       |           |            |            |                                  |
| 130 -> 135        | -0.20743      |           |            |            |                                  |
| 131 -> 138        | -0.22056      |           |            |            |                                  |
| 131 -> 139        | 0.47921       |           |            |            |                                  |
| 131 -> 140        | 0.11175       |           |            |            |                                  |
| 132 -> 138        | 0.15498       |           |            |            |                                  |
| 132 -> 140        | -0.15681      |           |            |            |                                  |
| 132 -> 142        | 0.12801       |           |            |            |                                  |
|                   |               |           |            |            |                                  |
| Excited state 30: | Singlet-A     | 6.4764 eV | 191.44 nm  | $f=0.0611$ | $\langle S^{*2} \rangle = 0.000$ |
| 126 -> 134        | 0.26973       |           |            |            |                                  |
| 127 -> 134        | -0.14444      |           |            |            |                                  |
| 128 -> 134        | -0.15209      |           |            |            |                                  |
| 130 -> 134        | -0.10094      |           |            |            |                                  |
| 130 -> 135        | 0.42383       |           |            |            |                                  |
| 131 -> 138        | -0.20422      |           |            |            |                                  |
| 132 -> 138        | 0.22032       |           |            |            |                                  |
| 132 -> 140        | -0.20085      |           |            |            |                                  |
|                   |               |           |            |            |                                  |
| SavETr:           | write IOETrn= | 770       | NScale= 10 | NData= 16  | NLR=1 LETran= 520.               |

\*\*\*\*\*

Rotatory strengths (R) in cgs ( $10^{-40}$  erg-esu-cm/Gauss) of **14**.

| State | XX      | YY       | ZZ       | R (length) | R (au)  |
|-------|---------|----------|----------|------------|---------|
| 1     | -3.7890 | -8.7037  | -0.6177  | -4.3701    | -0.0093 |
| 2     | -0.4444 | -0.7678  | -0.2287  | -0.4803    | -0.0010 |
| 3     | 49.0167 | -11.8450 | -11.5202 | 8.5505     | 0.0181  |

|    |           |           |           |          |         |
|----|-----------|-----------|-----------|----------|---------|
| 4  | 13.8838   | -45.1736  | -2.7332   | -11.3410 | -0.0241 |
| 5  | -29.2295  | -22.0724  | -2.6756   | -17.9925 | -0.0382 |
| 6  | -21.3679  | 117.1941  | -91.8441  | 1.3274   | 0.0028  |
| 7  | -16.7036  | 100.0740  | -47.1634  | 12.0690  | 0.0256  |
| 8  | -50.2189  | 68.9861   | -49.2302  | -10.1543 | -0.0215 |
| 9  | -179.6241 | 11.9726   | 3.3050    | -54.7822 | -0.1162 |
| 10 | 6.8228    | 105.2055  | -108.7470 | 1.0937   | 0.0023  |
| 11 | -16.8394  | -5.4489   | -8.0922   | -10.1268 | -0.0215 |
| 12 | -2.7436   | 377.8682  | -348.1261 | 8.9995   | 0.0191  |
| 13 | -0.1644   | 0.3011    | -1.6083   | -0.4905  | -0.0010 |
| 14 | -31.4071  | -15.5775  | -19.2783  | -22.0876 | -0.0469 |
| 15 | -30.9979  | 0.3044    | -11.6507  | -14.1147 | -0.0299 |
| 16 | 138.7762  | 17.3384   | 108.0297  | 88.0481  | 0.1868  |
| 17 | -23.0891  | -0.1774   | -14.2701  | -12.5122 | -0.0265 |
| 18 | 75.8096   | 8.6533    | -6.9828   | 25.8267  | 0.0548  |
| 19 | 7.3789    | 3.3244    | -28.2647  | -5.8538  | -0.0124 |
| 20 | 174.8455  | -109.5494 | -156.2146 | -30.3062 | -0.0643 |
| 21 | -3.1789   | 0.8810    | 3.6401    | 0.4474   | 0.0009  |
| 22 | 151.8022  | -5.3529   | -52.0145  | 31.4783  | 0.0668  |
| 23 | -154.5132 | 124.5858  | 79.5457   | 16.5394  | 0.0351  |
| 24 | 39.2753   | -21.1836  | -15.0977  | 0.9980   | 0.0021  |
| 25 | -2.6703   | 24.3286   | 4.2849    | 8.6478   | 0.0183  |
| 26 | -49.5469  | -11.7376  | -27.4282  | -29.5709 | -0.0627 |
| 27 | 30.7319   | 13.4410   | -6.1768   | 12.6653  | 0.0269  |
| 28 | 0.5579    | 40.1930   | -26.2287  | 4.8407   | 0.0103  |
| 29 | 121.8552  | -3.3926   | -46.7986  | 23.8880  | 0.0507  |
| 30 | -90.0580  | -12.2916  | -66.3371  | -56.2289 | -0.1193 |

$1/2[\langle 0|\text{del}b\rangle*\langle b|r|0\rangle + (\langle 0|r|b\rangle*\langle b|\text{del}0\rangle)^*]$  (Au)

| State | X       | Y       | Z       | Dip. S. | Osc.(frdel) |
|-------|---------|---------|---------|---------|-------------|
| 1     | -0.0001 | -0.0009 | 0.0000  | 0.0010  | 0.0007      |
| 2     | 0.0000  | -0.0001 | 0.0000  | 0.0001  | 0.0001      |
| 3     | -0.0045 | -0.0037 | -0.0003 | 0.0085  | 0.0057      |
| 4     | -0.0097 | -0.0104 | 0.0000  | 0.0201  | 0.0134      |
| 5     | -0.0358 | -0.0027 | 0.0000  | 0.0385  | 0.0256      |
| 6     | -0.0548 | -0.1211 | -0.0024 | 0.1783  | 0.1189      |
| 7     | -0.0315 | -0.0338 | -0.0016 | 0.0669  | 0.0446      |
| 8     | -0.0283 | -0.0245 | -0.0017 | 0.0544  | 0.0363      |
| 9     | -0.0192 | -0.0128 | -0.0010 | 0.0329  | 0.0220      |
| 10    | -0.0005 | -0.0500 | -0.0069 | 0.0574  | 0.0383      |
| 11    | -0.0185 | -0.0003 | -0.0011 | 0.0199  | 0.0133      |
| 12    | -0.0001 | -0.1120 | -0.0276 | 0.1397  | 0.0931      |
| 13    | -0.0001 | -0.0002 | -0.0001 | 0.0004  | 0.0003      |
| 14    | -0.0009 | -0.0046 | -0.0097 | 0.0152  | 0.0102      |

|    |         |         |         |        |        |
|----|---------|---------|---------|--------|--------|
| 15 | -0.0042 | -0.0005 | -0.0012 | 0.0059 | 0.0039 |
| 16 | -0.0068 | -0.0006 | -0.0373 | 0.0447 | 0.0298 |
| 17 | -0.0068 | 0.0000  | -0.0046 | 0.0114 | 0.0076 |
| 18 | -0.0206 | -0.0014 | -0.0011 | 0.0231 | 0.0154 |
| 19 | -0.0318 | -0.0010 | -0.0053 | 0.0380 | 0.0253 |
| 20 | -0.0747 | -0.0063 | -0.0264 | 0.1074 | 0.0716 |
| 21 | -0.0036 | -0.0010 | -0.0002 | 0.0047 | 0.0031 |
| 22 | -0.0690 | -0.0004 | -0.0059 | 0.0753 | 0.0502 |
| 23 | -0.0192 | -0.0427 | -0.0033 | 0.0652 | 0.0434 |
| 24 | -0.0198 | -0.0020 | -0.0059 | 0.0277 | 0.0185 |
| 25 | -0.0196 | -0.0058 | -0.0004 | 0.0258 | 0.0172 |
| 26 | -0.0052 | -0.0024 | -0.0093 | 0.0169 | 0.0112 |
| 27 | -0.0061 | -0.0054 | -0.0001 | 0.0116 | 0.0077 |
| 28 | -0.0001 | -0.0042 | -0.0019 | 0.0062 | 0.0041 |
| 29 | -0.1337 | 0.0000  | -0.0013 | 0.1350 | 0.0900 |
| 30 | -0.0351 | -0.0017 | -0.0119 | 0.0487 | 0.0325 |

Ground to Excited state transition densities written to RWF 633

Excitation energies and oscillator strengths:

Excited state 1: Singlet-A 4.6710 eV 265.43 nm  $f=0.0006$   $\langle S^{*2} \rangle=0.000$   
124 -> 133 0.10073  
125 -> 133 0.15091  
126 -> 133 -0.22361  
128 -> 133 -0.20139  
131 -> 133 0.56944  
132 -> 133 -0.19190

This state for optimization and/or second-order correction.

Copying the Excited state density for this state as the 1-particle RhoCI density.

Excited state 2: Singlet-A 4.7089 eV 263.30 nm  $f=0.0001$   $\langle S^{*2} \rangle=0.000$   
131 -> 133 0.13894  
132 -> 133 0.67922

Excited state 3: Singlet-A 4.8693 eV 254.62 nm  $f=0.0057$   $\langle S^{*2} \rangle=0.000$   
124 -> 133 -0.15321  
125 -> 133 -0.23452  
126 -> 133 0.33367  
127 -> 133 0.11755  
128 -> 133 0.29345  
130 -> 133 0.20901  
131 -> 133 0.39141

Excited state 4: Singlet-A 5.2477 eV 236.26 nm  $f=0.0134$   $\langle S^{*2} \rangle=0.000$   
127 -> 134 -0.24146  
127 -> 135 0.10704  
131 -> 134 -0.33016  
132 -> 134 0.52059

Excited state 5: Singlet-A 5.3378 eV 232.28 nm  $f=0.0258$   $\langle S^{*2} \rangle=0.000$   
127 -> 134 0.16995  
130 -> 133 0.15417  
131 -> 134 0.44174

|                   |           |           |           |            |                                   |
|-------------------|-----------|-----------|-----------|------------|-----------------------------------|
| 131 -> 135        | -0.10489  |           |           |            |                                   |
| 132 -> 134        | 0.44853   |           |           |            |                                   |
| Excited state 6:  | Singlet-A | 5.3549 eV | 231.53 nm | $f=0.1208$ | $\langle S^{**2} \rangle = 0.000$ |
| 128 -> 133        | -0.29688  |           |           |            |                                   |
| 130 -> 133        | 0.58739   |           |           |            |                                   |
| 131 -> 134        | -0.14961  |           |           |            |                                   |
| Excited state 7:  | Singlet-A | 5.5368 eV | 223.93 nm | $f=0.0453$ | $\langle S^{**2} \rangle = 0.000$ |
| 124 -> 133        | -0.12790  |           |           |            |                                   |
| 125 -> 133        | 0.26216   |           |           |            |                                   |
| 126 -> 133        | -0.33200  |           |           |            |                                   |
| 127 -> 133        | 0.14755   |           |           |            |                                   |
| 128 -> 133        | 0.43194   |           |           |            |                                   |
| 129 -> 133        | -0.27819  |           |           |            |                                   |
| Excited state 8:  | Singlet-A | 5.5419 eV | 223.72 nm | $f=0.0367$ | $\langle S^{**2} \rangle = 0.000$ |
| 124 -> 133        | -0.14192  |           |           |            |                                   |
| 125 -> 133        | 0.11405   |           |           |            |                                   |
| 126 -> 133        | -0.15490  |           |           |            |                                   |
| 127 -> 133        | -0.17683  |           |           |            |                                   |
| 128 -> 133        | 0.19283   |           |           |            |                                   |
| 129 -> 133        | 0.59581   |           |           |            |                                   |
| Excited state 9:  | Singlet-A | 5.6324 eV | 220.13 nm | $f=0.0222$ | $\langle S^{**2} \rangle = 0.000$ |
| 127 -> 133        | 0.18332   |           |           |            |                                   |
| 127 -> 134        | 0.41494   |           |           |            |                                   |
| 127 -> 135        | -0.14995  |           |           |            |                                   |
| 129 -> 133        | 0.15323   |           |           |            |                                   |
| 129 -> 134        | -0.15017  |           |           |            |                                   |
| 130 -> 134        | 0.20133   |           |           |            |                                   |
| 131 -> 134        | -0.35721  |           |           |            |                                   |
| Excited state 10: | Singlet-A | 5.6860 eV | 218.05 nm | $f=0.0386$ | $\langle S^{**2} \rangle = 0.000$ |
| 124 -> 133        | 0.11490   |           |           |            |                                   |
| 127 -> 133        | 0.60695   |           |           |            |                                   |
| 127 -> 134        | -0.15698  |           |           |            |                                   |
| 129 -> 133        | 0.20191   |           |           |            |                                   |
| 131 -> 134        | 0.10995   |           |           |            |                                   |
| Excited state 11: | Singlet-A | 5.8944 eV | 210.34 nm | $f=0.0136$ | $\langle S^{**2} \rangle = 0.000$ |
| 132 -> 135        | 0.56124   |           |           |            |                                   |
| 132 -> 136        | 0.33270   |           |           |            |                                   |
| 132 -> 139        | -0.13255  |           |           |            |                                   |
| 132 -> 140        | 0.16303   |           |           |            |                                   |
| Excited state 12: | Singlet-A | 5.8994 eV | 210.17 nm | $f=0.0932$ | $\langle S^{**2} \rangle = 0.000$ |
| 124 -> 133        | 0.61647   |           |           |            |                                   |
| 128 -> 133        | 0.21208   |           |           |            |                                   |
| 130 -> 133        | 0.19048   |           |           |            |                                   |
| Excited state 13: | Singlet-A | 5.9876 eV | 207.07 nm | $f=0.0003$ | $\langle S^{**2} \rangle = 0.000$ |
| 125 -> 133        | 0.55911   |           |           |            |                                   |
| 126 -> 133        | 0.42033   |           |           |            |                                   |
| Excited state 14: | Singlet-A | 5.9962 eV | 206.77 nm | $f=0.0102$ | $\langle S^{**2} \rangle = 0.000$ |
| 128 -> 134        | -0.28461  |           |           |            |                                   |

|                   |           |           |           |            |                                  |
|-------------------|-----------|-----------|-----------|------------|----------------------------------|
| 130 -> 134        | 0.34780   |           |           |            |                                  |
| 131 -> 135        | 0.41173   |           |           |            |                                  |
| 132 -> 135        | -0.15726  |           |           |            |                                  |
| 132 -> 136        | 0.21641   |           |           |            |                                  |
| Excited state 15: | Singlet-A | 6.0121 eV | 206.22 nm | $f=0.0040$ | $\langle S^{*2} \rangle = 0.000$ |
| 128 -> 134        | 0.14632   |           |           |            |                                  |
| 130 -> 134        | -0.17607  |           |           |            |                                  |
| 131 -> 135        | -0.17368  |           |           |            |                                  |
| 132 -> 135        | -0.37432  |           |           |            |                                  |
| 132 -> 136        | 0.43137   |           |           |            |                                  |
| 132 -> 137        | -0.10536  |           |           |            |                                  |
| 132 -> 139        | -0.13827  |           |           |            |                                  |
| 132 -> 140        | 0.15241   |           |           |            |                                  |
| 132 -> 142        | -0.11003  |           |           |            |                                  |
| Excited state 16: | Singlet-A | 6.0608 eV | 204.57 nm | $f=0.0299$ | $\langle S^{*2} \rangle = 0.000$ |
| 127 -> 134        | 0.13138   |           |           |            |                                  |
| 128 -> 134        | 0.18423   |           |           |            |                                  |
| 129 -> 134        | -0.14829  |           |           |            |                                  |
| 130 -> 134        | -0.38899  |           |           |            |                                  |
| 131 -> 135        | 0.46914   |           |           |            |                                  |
| 131 -> 137        | -0.10309  |           |           |            |                                  |
| Excited state 17: | Singlet-A | 6.1572 eV | 201.36 nm | $f=0.0076$ | $\langle S^{*2} \rangle = 0.000$ |
| 125 -> 134        | 0.10058   |           |           |            |                                  |
| 126 -> 134        | -0.10170  |           |           |            |                                  |
| 128 -> 134        | 0.33273   |           |           |            |                                  |
| 129 -> 134        | 0.57302   |           |           |            |                                  |
| Excited state 18: | Singlet-A | 6.2038 eV | 199.85 nm | $f=0.0156$ | $\langle S^{*2} \rangle = 0.000$ |
| 124 -> 134        | -0.11431  |           |           |            |                                  |
| 126 -> 134        | -0.14692  |           |           |            |                                  |
| 127 -> 134        | -0.29781  |           |           |            |                                  |
| 128 -> 134        | 0.40083   |           |           |            |                                  |
| 129 -> 134        | -0.31554  |           |           |            |                                  |
| 130 -> 134        | 0.30849   |           |           |            |                                  |
| Excited state 19: | Singlet-A | 6.2466 eV | 198.48 nm | $f=0.0259$ | $\langle S^{*2} \rangle = 0.000$ |
| 122 -> 133        | 0.56099   |           |           |            |                                  |
| 123 -> 133        | 0.37734   |           |           |            |                                  |
| Excited state 20: | Singlet-A | 6.2669 eV | 197.84 nm | $f=0.0726$ | $\langle S^{*2} \rangle = 0.000$ |
| 132 -> 136        | 0.20113   |           |           |            |                                  |
| 132 -> 137        | 0.53591   |           |           |            |                                  |
| 132 -> 138        | 0.17871   |           |           |            |                                  |
| 132 -> 139        | 0.26740   |           |           |            |                                  |
| 132 -> 141        | 0.10062   |           |           |            |                                  |
| 132 -> 142        | 0.10109   |           |           |            |                                  |
| 132 -> 143        | -0.12098  |           |           |            |                                  |
| Excited state 21: | Singlet-A | 6.3133 eV | 196.39 nm | $f=0.0032$ | $\langle S^{*2} \rangle = 0.000$ |
| 120 -> 133        | 0.11431   |           |           |            |                                  |
| 122 -> 133        | -0.35311  |           |           |            |                                  |
| 123 -> 133        | 0.57633   |           |           |            |                                  |
| Excited state 22: | Singlet-A | 6.3315 eV | 195.82 nm | $f=0.0508$ | $\langle S^{*2} \rangle = 0.000$ |

|                   |           |           |           |            |                                   |
|-------------------|-----------|-----------|-----------|------------|-----------------------------------|
| 132 -> 137        | -0.15840  |           |           |            |                                   |
| 132 -> 138        | 0.61125   |           |           |            |                                   |
| 132 -> 141        | 0.22989   |           |           |            |                                   |
| 132 -> 142        | -0.12127  |           |           |            |                                   |
| Excited state 23: | Singlet-A | 6.3858 eV | 194.15 nm | $f=0.0434$ | $\langle S^{**2} \rangle = 0.000$ |
| 131 -> 135        | 0.15891   |           |           |            |                                   |
| 131 -> 136        | -0.30632  |           |           |            |                                   |
| 131 -> 137        | 0.45710   |           |           |            |                                   |
| 131 -> 138        | -0.12065  |           |           |            |                                   |
| 131 -> 139        | -0.14071  |           |           |            |                                   |
| 131 -> 140        | 0.22696   |           |           |            |                                   |
| Excited state 24: | Singlet-A | 6.4249 eV | 192.97 nm | $f=0.0186$ | $\langle S^{**2} \rangle = 0.000$ |
| 132 -> 136        | -0.25999  |           |           |            |                                   |
| 132 -> 137        | 0.28360   |           |           |            |                                   |
| 132 -> 139        | -0.27111  |           |           |            |                                   |
| 132 -> 140        | 0.36613   |           |           |            |                                   |
| 132 -> 142        | -0.27515  |           |           |            |                                   |
| 132 -> 145        | -0.12383  |           |           |            |                                   |
| Excited state 25: | Singlet-A | 6.4484 eV | 192.27 nm | $f=0.0175$ | $\langle S^{**2} \rangle = 0.000$ |
| 124 -> 134        | 0.27644   |           |           |            |                                   |
| 125 -> 134        | -0.17967  |           |           |            |                                   |
| 126 -> 134        | 0.40402   |           |           |            |                                   |
| 127 -> 135        | 0.11543   |           |           |            |                                   |
| 128 -> 134        | 0.21140   |           |           |            |                                   |
| 130 -> 134        | 0.11862   |           |           |            |                                   |
| 131 -> 136        | 0.21405   |           |           |            |                                   |
| 131 -> 137        | 0.21295   |           |           |            |                                   |
| 131 -> 140        | 0.10549   |           |           |            |                                   |
| Excited state 26: | Singlet-A | 6.4594 eV | 191.94 nm | $f=0.0112$ | $\langle S^{**2} \rangle = 0.000$ |
| 124 -> 134        | -0.15377  |           |           |            |                                   |
| 126 -> 134        | -0.18593  |           |           |            |                                   |
| 128 -> 134        | -0.15239  |           |           |            |                                   |
| 131 -> 136        | 0.50347   |           |           |            |                                   |
| 131 -> 137        | 0.28794   |           |           |            |                                   |
| 131 -> 140        | 0.12219   |           |           |            |                                   |
| Excited state 27: | Singlet-A | 6.5253 eV | 190.00 nm | $f=0.0078$ | $\langle S^{**2} \rangle = 0.000$ |
| 128 -> 135        | 0.10081   |           |           |            |                                   |
| 130 -> 135        | -0.13273  |           |           |            |                                   |
| 131 -> 136        | -0.22236  |           |           |            |                                   |
| 131 -> 137        | 0.13487   |           |           |            |                                   |
| 131 -> 138        | 0.56333   |           |           |            |                                   |
| 131 -> 139        | 0.10638   |           |           |            |                                   |
| 131 -> 143        | 0.11378   |           |           |            |                                   |
| Excited state 28: | Singlet-A | 6.5277 eV | 189.94 nm | $f=0.0042$ | $\langle S^{**2} \rangle = 0.000$ |
| 119 -> 133        | -0.19337  |           |           |            |                                   |
| 120 -> 133        | -0.16952  |           |           |            |                                   |
| 121 -> 133        | 0.62670   |           |           |            |                                   |
| Excited state 29: | Singlet-A | 6.5479 eV | 189.35 nm | $f=0.0913$ | $\langle S^{**2} \rangle = 0.000$ |
| 131 -> 136        | 0.12313   |           |           |            |                                   |
| 131 -> 139        | -0.29194  |           |           |            |                                   |

132 -> 137      -0.18277  
 132 -> 139      0.38271  
 132 -> 140      0.39496

Excited state 30:      Singlet-A      6.5598 eV    189.00 nm     $f=0.0330$      $\langle S^{*2} \rangle=0.000$   
 125 -> 134      -0.22916  
 126 -> 134      -0.13920  
 128 -> 135      -0.26720  
 130 -> 135      0.41273  
 131 -> 138      0.21214  
 131 -> 139      -0.19206  
 131 -> 140      -0.11438

SavETr: write IOETrn= 770 NScale= 10 NData= 16 NLR=1 LETran= 520.

\*\*\*\*\*

Rotatory strengths (R) in cgs ( $10^{*-40}$  erg-esu-cm/Gauss) of **15**.

| State | XX        | YY        | ZZ        | R (length) | R (au)  |
|-------|-----------|-----------|-----------|------------|---------|
| 1     | 2.8430    | -9.5712   | -0.8418   | -2.5233    | -0.0054 |
| 2     | 0.0151    | -0.1159   | -0.0036   | -0.0348    | -0.0001 |
| 3     | -13.3064  | 7.9829    | -1.6074   | -2.3103    | -0.0049 |
| 4     | 24.4099   | -6.4020   | -2.5318   | 5.1587     | 0.0109  |
| 5     | 11.2471   | -10.7994  | -25.4771  | -8.3431    | -0.0177 |
| 6     | -23.2427  | -9.1119   | 0.8609    | -10.4979   | -0.0223 |
| 7     | -44.1163  | 6.0620    | -10.9820  | -16.3454   | -0.0347 |
| 8     | -2.9270   | -12.4780  | -1.6259   | -5.6770    | -0.0120 |
| 9     | -213.7178 | 35.7325   | 0.7670    | -59.0728   | -0.1253 |
| 10    | 265.7660  | -111.9885 | -40.3502  | 37.8091    | 0.0802  |
| 11    | 0.0087    | 0.2076    | -0.0117   | 0.0682     | 0.0001  |
| 12    | 1.1923    | -16.5143  | -19.9958  | -11.7726   | -0.0250 |
| 13    | 0.6248    | 65.0055   | -35.1358  | 10.1648    | 0.0216  |
| 14    | -51.6301  | 62.3845   | 12.9848   | 7.9130     | 0.0168  |
| 15    | 8.4566    | -10.2445  | 3.8068    | 0.6730     | 0.0014  |
| 16    | -2.4327   | 130.0975  | -116.9603 | 3.5682     | 0.0076  |
| 17    | 3.5117    | 25.1009   | -41.5366  | -4.3080    | -0.0091 |
| 18    | -151.4549 | 43.9407   | 32.7853   | -24.9096   | -0.0528 |
| 19    | 28.0674   | 14.5281   | 0.2433    | 14.2796    | 0.0303  |
| 20    | 56.9856   | -134.3967 | -43.2843  | -40.2318   | -0.0853 |
| 21    | 40.6841   | 17.3950   | -22.3128  | 11.9221    | 0.0253  |
| 22    | 259.7159  | -0.6134   | -108.9843 | 50.0394    | 0.1061  |
| 23    | -4.9450   | -31.1539  | 4.6234    | -10.4918   | -0.0223 |
| 24    | -3.0882   | -0.7926   | 3.6331    | -0.0826    | -0.0002 |
| 25    | 3.4386    | 5.4487    | -9.0694   | -0.0607    | -0.0001 |
| 26    | -2.3438   | 3.7507    | -0.0417   | 0.4551     | 0.0010  |
| 27    | -109.5913 | 96.4775   | 94.7524   | 27.2129    | 0.0577  |
| 28    | 170.9741  | 2.3000    | -101.8779 | 23.7987    | 0.0505  |
| 29    | 1.9975    | -0.6553   | -3.9666   | -0.8748    | -0.0019 |



30            3.6837            -2.8388            -2.2631            -0.4727            -0.0010

1/2[ $\langle 0 | \text{del} | b \rangle^* \langle b | r | 0 \rangle + (\langle 0 | r | b \rangle^* \langle b | \text{del} | 0 \rangle)^*$ ] (Au)

| State | X       | Y       | Z       | Dip. S. | Osc.(frdel) |
|-------|---------|---------|---------|---------|-------------|
| 1     | -0.0062 | -0.0016 | -0.0001 | 0.0078  | 0.0052      |
| 2     | 0.0000  | 0.0000  | 0.0000  | 0.0000  | 0.0000      |
| 3     | -0.0052 | -0.0001 | 0.0000  | 0.0053  | 0.0035      |
| 4     | -0.0566 | -0.0018 | -0.0004 | 0.0589  | 0.0393      |
| 5     | -0.0139 | -0.0122 | -0.0018 | 0.0278  | 0.0185      |
| 6     | -0.0808 | -0.0010 | -0.0001 | 0.0820  | 0.0546      |
| 7     | -0.0143 | -0.0222 | -0.0011 | 0.0376  | 0.0251      |
| 8     | -0.0266 | -0.0028 | -0.0001 | 0.0295  | 0.0196      |
| 9     | -0.0399 | -0.0112 | 0.0000  | 0.0511  | 0.0341      |
| 10    | -0.3017 | -0.0139 | -0.0019 | 0.3175  | 0.2117      |
| 11    | 0.0000  | 0.0000  | 0.0000  | 0.0000  | 0.0000      |
| 12    | -0.0217 | -0.0020 | -0.0026 | 0.0263  | 0.0175      |
| 13    | -0.0244 | -0.0086 | -0.0036 | 0.0366  | 0.0244      |
| 14    | -0.0015 | -0.0135 | -0.0207 | 0.0356  | 0.0238      |
| 15    | -0.0007 | -0.0004 | -0.0002 | 0.0013  | 0.0009      |
| 16    | -0.0004 | -0.0454 | -0.0095 | 0.0553  | 0.0369      |
| 17    | -0.0025 | -0.0040 | -0.0026 | 0.0090  | 0.0060      |
| 18    | -0.1010 | -0.0072 | -0.0025 | 0.1106  | 0.0737      |
| 19    | -0.0082 | -0.0024 | -0.0001 | 0.0107  | 0.0071      |
| 20    | -0.0206 | -0.0080 | -0.0116 | 0.0402  | 0.0268      |
| 21    | -0.0091 | -0.0003 | -0.0031 | 0.0124  | 0.0083      |
| 22    | -0.0850 | 0.0000  | -0.0170 | 0.1020  | 0.0680      |
| 23    | -0.0002 | -0.0028 | -0.0025 | 0.0055  | 0.0036      |
| 24    | -0.0003 | 0.0000  | -0.0003 | 0.0006  | 0.0004      |
| 25    | -0.0001 | -0.0016 | -0.0020 | 0.0037  | 0.0025      |
| 26    | -0.0001 | -0.0038 | -0.0021 | 0.0060  | 0.0040      |
| 27    | -0.0141 | -0.0118 | -0.0192 | 0.0451  | 0.0301      |
| 28    | -0.0871 | 0.0000  | -0.0087 | 0.0958  | 0.0639      |
| 29    | -0.0012 | 0.0000  | -0.0003 | 0.0015  | 0.0010      |
| 30    | -0.0073 | -0.0007 | 0.0000  | 0.0081  | 0.0054      |

Ground to Excited state transition densities written to RWF 633

Excitation energies and oscillator strengths:

Excited state 1: Singlet-A 4.5151 eV 274.60 nm  $f=0.0054$   $\langle S^{*2} \rangle=0.000$   
 131 -> 133 0.69268  
 132 -> 133 0.11166

This state for optimization and/or second-order correction.

Copying the Excited state density for this state as the 1-particle RhoCI density.

Excited state 2: Singlet-A 4.6121 eV 268.82 nm  $f=0.0000$   $\langle S^{*2} \rangle=0.000$   
 131 -> 133 -0.10960

|                   |           |           |           |            |                                   |
|-------------------|-----------|-----------|-----------|------------|-----------------------------------|
| 132 -> 133        | 0.69799   |           |           |            |                                   |
| Excited state 3:  | Singlet-A | 4.7812 eV | 259.31 nm | $f=0.0035$ | $\langle S^{**2} \rangle = 0.000$ |
| 125 -> 133        | 0.55957   |           |           |            |                                   |
| 127 -> 133        | 0.26665   |           |           |            |                                   |
| 128 -> 133        | -0.17095  |           |           |            |                                   |
| 129 -> 133        | 0.22384   |           |           |            |                                   |
| Excited state 4:  | Singlet-A | 5.3846 eV | 230.26 nm | $f=0.0397$ | $\langle S^{**2} \rangle = 0.000$ |
| 127 -> 133        | -0.10794  |           |           |            |                                   |
| 128 -> 133        | 0.30784   |           |           |            |                                   |
| 128 -> 134        | -0.10198  |           |           |            |                                   |
| 129 -> 133        | 0.29189   |           |           |            |                                   |
| 130 -> 133        | 0.50114   |           |           |            |                                   |
| 131 -> 134        | -0.10857  |           |           |            |                                   |
| 132 -> 134        | -0.13192  |           |           |            |                                   |
| Excited state 5:  | Singlet-A | 5.4026 eV | 229.49 nm | $f=0.0186$ | $\langle S^{**2} \rangle = 0.000$ |
| 128 -> 134        | 0.28219   |           |           |            |                                   |
| 128 -> 135        | 0.10142   |           |           |            |                                   |
| 129 -> 134        | 0.10185   |           |           |            |                                   |
| 130 -> 133        | 0.18299   |           |           |            |                                   |
| 130 -> 134        | 0.10388   |           |           |            |                                   |
| 131 -> 134        | 0.31857   |           |           |            |                                   |
| 132 -> 134        | 0.45372   |           |           |            |                                   |
| Excited state 6:  | Singlet-A | 5.4834 eV | 226.11 nm | $f=0.0554$ | $\langle S^{**2} \rangle = 0.000$ |
| 127 -> 133        | 0.22127   |           |           |            |                                   |
| 128 -> 133        | -0.20685  |           |           |            |                                   |
| 129 -> 133        | -0.39056  |           |           |            |                                   |
| 130 -> 133        | 0.41555   |           |           |            |                                   |
| 131 -> 134        | 0.17624   |           |           |            |                                   |
| 132 -> 134        | -0.19610  |           |           |            |                                   |
| Excited state 7:  | Singlet-A | 5.4910 eV | 225.80 nm | $f=0.0254$ | $\langle S^{**2} \rangle = 0.000$ |
| 128 -> 133        | 0.11776   |           |           |            |                                   |
| 129 -> 133        | 0.15677   |           |           |            |                                   |
| 130 -> 133        | -0.16364  |           |           |            |                                   |
| 131 -> 134        | 0.47176   |           |           |            |                                   |
| 132 -> 134        | -0.41897  |           |           |            |                                   |
| Excited state 8:  | Singlet-A | 5.5067 eV | 225.15 nm | $f=0.0199$ | $\langle S^{**2} \rangle = 0.000$ |
| 127 -> 133        | 0.50585   |           |           |            |                                   |
| 128 -> 133        | 0.46383   |           |           |            |                                   |
| 130 -> 133        | -0.11444  |           |           |            |                                   |
| Excited state 9:  | Singlet-A | 5.6369 eV | 219.95 nm | $f=0.0346$ | $\langle S^{**2} \rangle = 0.000$ |
| 128 -> 134        | 0.45083   |           |           |            |                                   |
| 128 -> 135        | 0.14441   |           |           |            |                                   |
| 129 -> 134        | 0.18481   |           |           |            |                                   |
| 130 -> 134        | 0.18732   |           |           |            |                                   |
| 131 -> 134        | -0.31579  |           |           |            |                                   |
| 132 -> 134        | -0.22645  |           |           |            |                                   |
| Excited state 10: | Singlet-A | 5.6535 eV | 219.30 nm | $f=0.2141$ | $\langle S^{**2} \rangle = 0.000$ |
| 124 -> 133        | -0.10876  |           |           |            |                                   |
| 125 -> 133        | 0.38816   |           |           |            |                                   |

|                                                                                                                     |                                                                                          |           |           |            |                                   |
|---------------------------------------------------------------------------------------------------------------------|------------------------------------------------------------------------------------------|-----------|-----------|------------|-----------------------------------|
| 127 -> 133                                                                                                          | -0.31083                                                                                 |           |           |            |                                   |
| 128 -> 133                                                                                                          | 0.30231                                                                                  |           |           |            |                                   |
| 129 -> 133                                                                                                          | -0.34678                                                                                 |           |           |            |                                   |
| Excited state 11:<br>126 -> 133                                                                                     | Singlet-A<br>0.70182                                                                     | 5.8801 eV | 210.85 nm | $f=0.0000$ | $\langle S^{**2} \rangle = 0.000$ |
| Excited state 12:<br>132 -> 135<br>132 -> 136<br>132 -> 138<br>132 -> 140<br>132 -> 142                             | Singlet-A<br>0.49490<br>0.36753<br>0.18112<br>-0.21217<br>0.12262                        | 5.9209 eV | 209.40 nm | $f=0.0180$ | $\langle S^{**2} \rangle = 0.000$ |
| Excited state 13:<br>123 -> 133<br>124 -> 133<br>129 -> 133                                                         | Singlet-A<br>-0.10690<br>0.65175<br>-0.16817                                             | 5.9232 eV | 209.32 nm | $f=0.0240$ | $\langle S^{**2} \rangle = 0.000$ |
| Excited state 14:<br>131 -> 135                                                                                     | Singlet-A<br>0.65775                                                                     | 6.0229 eV | 205.86 nm | $f=0.0239$ | $\langle S^{**2} \rangle = 0.000$ |
| Excited state 15:<br>132 -> 135<br>132 -> 136<br>132 -> 138<br>132 -> 140<br>132 -> 142                             | Singlet-A<br>0.47158<br>-0.40651<br>-0.15746<br>0.17680<br>-0.11537                      | 6.1059 eV | 203.06 nm | $f=0.0009$ | $\langle S^{**2} \rangle = 0.000$ |
| Excited state 16:<br>120 -> 133<br>121 -> 133<br>122 -> 133<br>123 -> 133                                           | Singlet-A<br>0.11811<br>-0.25188<br>0.52083<br>-0.32421                                  | 6.1124 eV | 202.84 nm | $f=0.0372$ | $\langle S^{**2} \rangle = 0.000$ |
| Excited state 17:<br>121 -> 133<br>122 -> 133<br>123 -> 133<br>124 -> 133                                           | Singlet-A<br>0.21402<br>0.42765<br>0.49193<br>0.12333                                    | 6.1856 eV | 200.44 nm | $f=0.0060$ | $\langle S^{**2} \rangle = 0.000$ |
| Excited state 18:<br>127 -> 134<br>130 -> 134<br>131 -> 136<br>131 -> 137<br>131 -> 138<br>131 -> 140<br>131 -> 141 | Singlet-A<br>0.20153<br>-0.19548<br>0.22885<br>0.41992<br>0.22314<br>0.24410<br>-0.11012 | 6.2854 eV | 197.26 nm | $f=0.0740$ | $\langle S^{**2} \rangle = 0.000$ |
| Excited state 19:<br>119 -> 133<br>121 -> 133<br>122 -> 133<br>123 -> 133                                           | Singlet-A<br>0.10637<br>0.56492<br>0.10828<br>-0.33965                                   | 6.3091 eV | 196.52 nm | $f=0.0073$ | $\langle S^{**2} \rangle = 0.000$ |
| Excited state 20:                                                                                                   | Singlet-A                                                                                | 6.3107 eV | 196.47 nm | $f=0.0272$ | $\langle S^{**2} \rangle = 0.000$ |

|                   |           |           |           |            |                                  |
|-------------------|-----------|-----------|-----------|------------|----------------------------------|
| 121 -> 133        | -0.12507  |           |           |            |                                  |
| 130 -> 134        | -0.16518  |           |           |            |                                  |
| 132 -> 136        | 0.23440   |           |           |            |                                  |
| 132 -> 137        | -0.31866  |           |           |            |                                  |
| 132 -> 138        | -0.13632  |           |           |            |                                  |
| 132 -> 139        | 0.40966   |           |           |            |                                  |
| 132 -> 140        | 0.11481   |           |           |            |                                  |
| 132 -> 141        | 0.15855   |           |           |            |                                  |
| 132 -> 143        | 0.14366   |           |           |            |                                  |
| Excited state 21: | Singlet-A | 6.3217 eV | 196.13 nm | $f=0.0085$ | $\langle S^{*2} \rangle = 0.000$ |
| 128 -> 134        | -0.18700  |           |           |            |                                  |
| 130 -> 134        | 0.59221   |           |           |            |                                  |
| 131 -> 137        | 0.15913   |           |           |            |                                  |
| 131 -> 138        | 0.12036   |           |           |            |                                  |
| 131 -> 140        | 0.11786   |           |           |            |                                  |
| 132 -> 139        | 0.13770   |           |           |            |                                  |
| Excited state 22: | Singlet-A | 6.3374 eV | 195.64 nm | $f=0.0689$ | $\langle S^{*2} \rangle = 0.000$ |
| 132 -> 136        | -0.18632  |           |           |            |                                  |
| 132 -> 138        | 0.54843   |           |           |            |                                  |
| 132 -> 139        | 0.21172   |           |           |            |                                  |
| 132 -> 141        | 0.21470   |           |           |            |                                  |
| 132 -> 143        | -0.14480  |           |           |            |                                  |
| 132 -> 144        | 0.14725   |           |           |            |                                  |
| Excited state 23: | Singlet-A | 6.3750 eV | 194.49 nm | $f=0.0037$ | $\langle S^{*2} \rangle = 0.000$ |
| 127 -> 134        | 0.51732   |           |           |            |                                  |
| 129 -> 134        | -0.23501  |           |           |            |                                  |
| 130 -> 134        | 0.12761   |           |           |            |                                  |
| 131 -> 136        | 0.14797   |           |           |            |                                  |
| 131 -> 138        | -0.19542  |           |           |            |                                  |
| 131 -> 139        | 0.14782   |           |           |            |                                  |
| 131 -> 140        | -0.16247  |           |           |            |                                  |
| Excited state 24: | Singlet-A | 6.4039 eV | 193.61 nm | $f=0.0004$ | $\langle S^{*2} \rangle = 0.000$ |
| 131 -> 138        | -0.10908  |           |           |            |                                  |
| 132 -> 136        | 0.19217   |           |           |            |                                  |
| 132 -> 137        | 0.50018   |           |           |            |                                  |
| 132 -> 139        | 0.25703   |           |           |            |                                  |
| 132 -> 140        | 0.18986   |           |           |            |                                  |
| 132 -> 141        | -0.15831  |           |           |            |                                  |
| 132 -> 142        | -0.18458  |           |           |            |                                  |
| Excited state 25: | Singlet-A | 6.4230 eV | 193.03 nm | $f=0.0025$ | $\langle S^{*2} \rangle = 0.000$ |
| 127 -> 134        | -0.14866  |           |           |            |                                  |
| 131 -> 135        | 0.10764   |           |           |            |                                  |
| 131 -> 136        | 0.58653   |           |           |            |                                  |
| 131 -> 137        | -0.13188  |           |           |            |                                  |
| 131 -> 139        | -0.26212  |           |           |            |                                  |
| Excited state 26: | Singlet-A | 6.4280 eV | 192.88 nm | $f=0.0039$ | $\langle S^{*2} \rangle = 0.000$ |
| 127 -> 134        | -0.12974  |           |           |            |                                  |
| 131 -> 137        | 0.44986   |           |           |            |                                  |
| 131 -> 138        | -0.43886  |           |           |            |                                  |
| 131 -> 140        | -0.20432  |           |           |            |                                  |

Excited state 27: Singlet-A 6.4623 eV 191.86 nm  $f=0.0303$   $\langle S^{*2} \rangle=0.000$   
 127 -> 134 -0.17737  
 131 -> 136 0.21527  
 131 -> 137 -0.10651  
 131 -> 139 0.59537

Excited state 28: Singlet-A 6.5093 eV 190.47 nm  $f=0.0649$   $\langle S^{*2} \rangle=0.000$   
 132 -> 136 0.15399  
 132 -> 137 -0.24433  
 132 -> 138 0.21091  
 132 -> 139 -0.27812  
 132 -> 140 0.42301  
 132 -> 141 -0.18926  
 132 -> 142 -0.12884  
 132 -> 146 -0.11968

Excited state 29: Singlet-A 6.5415 eV 189.53 nm  $f=0.0010$   $\langle S^{*2} \rangle=0.000$   
 127 -> 134 0.26897  
 128 -> 134 -0.15947  
 129 -> 134 0.59129

Excited state 30: Singlet-A 6.5874 eV 188.21 nm  $f=0.0056$   $\langle S^{*2} \rangle=0.000$   
 118 -> 133 -0.21749  
 119 -> 133 0.17698  
 120 -> 133 0.59756  
 121 -> 133 0.13125

SavETr: write IOETrn= 770 NScale= 10 NData= 16 NLR=1 LETran= 520.  
 \*\*\*\*\*

Rotatory strengths (R) in cgs ( $10^{*-40}$  erg-esu-cm/Gauss) of 16.

| State | XX        | YY        | ZZ        | R (length) | R (au)  |
|-------|-----------|-----------|-----------|------------|---------|
| 1     | 5.7878    | -14.6333  | -0.5648   | -3.1368    | -0.0067 |
| 2     | 0.0624    | -0.1431   | 0.0044    | -0.0254    | -0.0001 |
| 3     | -6.2754   | 15.4267   | -14.5071  | -1.7852    | -0.0038 |
| 4     | -55.0869  | -0.2328   | 16.0691   | -13.0835   | -0.0278 |
| 5     | 65.2885   | -72.3769  | 6.2120    | -0.2921    | -0.0006 |
| 6     | -0.2272   | -0.2885   | -0.7764   | -0.4307    | -0.0009 |
| 7     | 155.2248  | -181.3953 | 25.7289   | -0.1472    | -0.0003 |
| 8     | 41.2654   | -42.1506  | 4.4640    | 1.1929     | 0.0025  |
| 9     | 300.8506  | -335.2584 | 72.3766   | 12.6563    | 0.0268  |
| 10    | 69.3230   | 1.7813    | 11.6594   | 27.5879    | 0.0585  |
| 11    | 1.8397    | -0.1552   | -0.6566   | 0.3426     | 0.0007  |
| 12    | 33.7732   | -1.0755   | -97.5870  | -21.6298   | -0.0459 |
| 13    | -9.6735   | 45.5646   | -4.5563   | 10.4449    | 0.0222  |
| 14    | -147.1432 | 114.8334  | 12.9005   | -6.4697    | -0.0137 |
| 15    | 20.4669   | 7.5480    | -45.8584  | -5.9479    | -0.0126 |
| 16    | 7.4888    | 125.1397  | -124.2278 | 2.8002     | 0.0059  |
| 17    | -493.7197 | 168.1205  | 332.0665  | 2.1558     | 0.0046  |
| 18    | 23.4392   | 4.4214    | 13.8220   | 13.8942    | 0.0295  |
| 19    | -5.3631   | 37.4931   | -31.1358  | 0.3314     | 0.0007  |
| 20    | 2.0610    | 57.0252   | -75.9359  | -5.6166    | -0.0119 |

|    |          |          |           |          |         |
|----|----------|----------|-----------|----------|---------|
| 21 | 125.8299 | 4.5157   | -117.1171 | 4.4095   | 0.0094  |
| 22 | 4.5930   | -1.5023  | -0.5088   | 0.8607   | 0.0018  |
| 23 | 97.4744  | 192.9955 | -187.1117 | 34.4527  | 0.0731  |
| 24 | -28.1289 | 8.6809   | 13.3374   | -2.0369  | -0.0043 |
| 25 | 31.1693  | -30.3985 | 2.2331    | 1.0013   | 0.0021  |
| 26 | 6.7832   | -19.0731 | 0.5410    | -3.9163  | -0.0083 |
| 27 | -9.4232  | 1.2643   | -0.4275   | -2.8621  | -0.0061 |
| 28 | 69.5069  | 71.6651  | -184.0546 | -14.2942 | -0.0303 |
| 29 | -14.5080 | 290.7437 | -299.9237 | -7.8960  | -0.0167 |
| 30 | -35.9754 | -28.9008 | -86.3345  | -50.4035 | -0.1069 |

$1/2[⟨0|del|b⟩*⟨b|r|0⟩ + (⟨0|r|b⟩*⟨b|del|0⟩)*]$  (Au)

| State | X       | Y       | Z       | Dip. S. | Osc.(frdel) |
|-------|---------|---------|---------|---------|-------------|
| 1     | -0.0049 | -0.0035 | 0.0000  | 0.0084  | 0.0056      |
| 2     | 0.0000  | 0.0000  | 0.0000  | 0.0001  | 0.0000      |
| 3     | -0.0040 | -0.0010 | -0.0005 | 0.0055  | 0.0037      |
| 4     | -0.0180 | 0.0000  | -0.0003 | 0.0183  | 0.0122      |
| 5     | -0.0433 | -0.0171 | -0.0022 | 0.0626  | 0.0417      |
| 6     | -0.0001 | 0.0000  | 0.0000  | 0.0001  | 0.0001      |
| 7     | -0.0842 | -0.0330 | -0.0057 | 0.1229  | 0.0820      |
| 8     | -0.0386 | -0.0031 | -0.0048 | 0.0465  | 0.0310      |
| 9     | -0.1595 | -0.0482 | -0.0222 | 0.2299  | 0.1533      |
| 10    | -0.0127 | -0.0001 | -0.0028 | 0.0156  | 0.0104      |
| 11    | -0.0013 | 0.0000  | -0.0009 | 0.0021  | 0.0014      |
| 12    | -0.0054 | 0.0000  | -0.0147 | 0.0201  | 0.0134      |
| 13    | -0.0125 | -0.0024 | -0.0197 | 0.0347  | 0.0231      |
| 14    | -0.0130 | -0.0144 | -0.0267 | 0.0541  | 0.0361      |
| 15    | -0.0139 | -0.0012 | -0.0087 | 0.0238  | 0.0159      |
| 16    | -0.0012 | -0.0125 | -0.0297 | 0.0434  | 0.0289      |
| 17    | -0.0832 | -0.0073 | -0.0384 | 0.1290  | 0.0860      |
| 18    | -0.0015 | -0.0020 | -0.0043 | 0.0078  | 0.0052      |
| 19    | -0.0020 | -0.0013 | -0.0156 | 0.0188  | 0.0125      |
| 20    | -0.0017 | -0.0095 | -0.0125 | 0.0238  | 0.0158      |
| 21    | -0.0478 | 0.0000  | -0.0098 | 0.0576  | 0.0384      |
| 22    | -0.0021 | -0.0003 | -0.0002 | 0.0026  | 0.0017      |
| 23    | -0.0290 | -0.0272 | -0.0270 | 0.0833  | 0.0555      |
| 24    | -0.0050 | -0.0004 | -0.0016 | 0.0070  | 0.0047      |
| 25    | -0.0055 | -0.0043 | -0.0005 | 0.0103  | 0.0069      |
| 26    | -0.0019 | -0.0029 | -0.0001 | 0.0048  | 0.0032      |
| 27    | -0.0075 | -0.0007 | 0.0000  | 0.0082  | 0.0055      |
| 28    | -0.0262 | -0.0250 | -0.0335 | 0.0846  | 0.0564      |
| 29    | -0.0940 | -0.0322 | -0.0118 | 0.1379  | 0.0920      |
| 30    | -0.0039 | -0.0045 | -0.0188 | 0.0273  | 0.0182      |

Ground to Excited state transition densities written to RWF 633

Excitation energies and oscillator strengths:

Excited state 1: Singlet-A 4.4549 eV 278.31 nm  $f=0.0058$   $\langle S^{*2} \rangle = 0.000$   
 131 -> 133 0.62922  
 132 -> 133 -0.31472

This state for optimization and/or second-order correction.

Copying the Excited state density for this state as the 1-particle RhoCI density.

Excited state 2: Singlet-A 4.6551 eV 266.34 nm  $f=0.0000$   $\langle S^{*2} \rangle = 0.000$   
 131 -> 133 0.31587  
 132 -> 133 0.63243

Excited state 3: Singlet-A 4.7826 eV 259.24 nm  $f=0.0036$   $\langle S^{*2} \rangle = 0.000$   
 125 -> 133 0.56867  
 127 -> 133 0.11917  
 128 -> 133 0.29900  
 129 -> 133 -0.20285

Excited state 4: Singlet-A 5.2616 eV 235.64 nm  $f=0.0123$   $\langle S^{*2} \rangle = 0.000$   
 127 -> 134 0.13551  
 128 -> 134 -0.19300  
 129 -> 134 -0.11673  
 130 -> 134 -0.10171  
 131 -> 134 0.60422  
 132 -> 134 -0.14675

Excited state 5: Singlet-A 5.4161 eV 228.92 nm  $f=0.0424$   $\langle S^{*2} \rangle = 0.000$   
 128 -> 133 0.34709  
 129 -> 133 0.33687  
 130 -> 133 0.49057

Excited state 6: Singlet-A 5.4492 eV 227.53 nm  $f=0.0001$   $\langle S^{*2} \rangle = 0.000$   
 125 -> 133 0.17161  
 127 -> 133 -0.36877  
 128 -> 133 -0.30859  
 129 -> 133 -0.19958  
 130 -> 133 0.44279

Excited state 7: Singlet-A 5.5267 eV 224.34 nm  $f=0.0832$   $\langle S^{*2} \rangle = 0.000$   
 123 -> 133 -0.13104  
 125 -> 133 0.23037  
 127 -> 133 -0.42134  
 129 -> 133 0.42796  
 130 -> 133 -0.24107

Excited state 8: Singlet-A 5.6174 eV 220.71 nm  $f=0.0312$   $\langle S^{*2} \rangle = 0.000$   
 127 -> 133 -0.11900  
 128 -> 133 0.13123  
 128 -> 134 -0.11266  
 132 -> 134 0.64035

Excited state 9: Singlet-A 5.6260 eV 220.38 nm  $f=0.1548$   $\langle S^{*2} \rangle = 0.000$   
 125 -> 133 -0.24369  
 127 -> 133 -0.36922  
 128 -> 133 0.41144  
 129 -> 133 -0.26614

|                   |           |           |           |            |                                  |
|-------------------|-----------|-----------|-----------|------------|----------------------------------|
| 132 -> 134        | -0.20561  |           |           |            |                                  |
| Excited state 10: | Singlet-A | 5.8686 eV | 211.27 nm | $f=0.0104$ | $\langle S^{*2} \rangle = 0.000$ |
| 127 -> 134        | -0.27509  |           |           |            |                                  |
| 128 -> 134        | 0.35703   |           |           |            |                                  |
| 129 -> 134        | 0.18950   |           |           |            |                                  |
| 130 -> 134        | 0.20725   |           |           |            |                                  |
| 131 -> 134        | 0.30586   |           |           |            |                                  |
| 131 -> 135        | 0.24142   |           |           |            |                                  |
| 132 -> 134        | 0.13450   |           |           |            |                                  |
| 132 -> 135        | -0.10481  |           |           |            |                                  |
| Excited state 11: | Singlet-A | 5.8774 eV | 210.95 nm | $f=0.0014$ | $\langle S^{*2} \rangle = 0.000$ |
| 126 -> 133        | 0.69694   |           |           |            |                                  |
| Excited state 12: | Singlet-A | 5.9218 eV | 209.37 nm | $f=0.0134$ | $\langle S^{*2} \rangle = 0.000$ |
| 132 -> 135        | 0.36838   |           |           |            |                                  |
| 132 -> 136        | 0.42599   |           |           |            |                                  |
| 132 -> 137        | -0.12895  |           |           |            |                                  |
| 132 -> 138        | -0.10547  |           |           |            |                                  |
| 132 -> 139        | 0.24922   |           |           |            |                                  |
| 132 -> 140        | 0.15192   |           |           |            |                                  |
| Excited state 13: | Singlet-A | 5.9452 eV | 208.54 nm | $f=0.0229$ | $\langle S^{*2} \rangle = 0.000$ |
| 123 -> 133        | 0.55787   |           |           |            |                                  |
| 124 -> 133        | -0.32879  |           |           |            |                                  |
| 129 -> 133        | 0.14099   |           |           |            |                                  |
| Excited state 14: | Singlet-A | 5.9495 eV | 208.40 nm | $f=0.0362$ | $\langle S^{*2} \rangle = 0.000$ |
| 127 -> 134        | 0.10107   |           |           |            |                                  |
| 128 -> 134        | -0.12660  |           |           |            |                                  |
| 131 -> 134        | -0.11294  |           |           |            |                                  |
| 131 -> 135        | 0.52479   |           |           |            |                                  |
| 131 -> 136        | 0.14985   |           |           |            |                                  |
| 131 -> 137        | 0.12306   |           |           |            |                                  |
| 132 -> 135        | -0.15343  |           |           |            |                                  |
| 132 -> 136        | 0.14790   |           |           |            |                                  |
| 132 -> 137        | -0.13857  |           |           |            |                                  |
| 132 -> 139        | 0.11242   |           |           |            |                                  |
| Excited state 15: | Singlet-A | 6.0481 eV | 205.00 nm | $f=0.0161$ | $\langle S^{*2} \rangle = 0.000$ |
| 131 -> 135        | 0.27333   |           |           |            |                                  |
| 132 -> 135        | 0.55329   |           |           |            |                                  |
| 132 -> 136        | -0.28350  |           |           |            |                                  |
| Excited state 16: | Singlet-A | 6.0544 eV | 204.78 nm | $f=0.0291$ | $\langle S^{*2} \rangle = 0.000$ |
| 121 -> 133        | 0.17586   |           |           |            |                                  |
| 122 -> 133        | 0.28345   |           |           |            |                                  |
| 123 -> 133        | 0.32709   |           |           |            |                                  |
| 124 -> 133        | 0.50046   |           |           |            |                                  |
| 129 -> 133        | 0.10401   |           |           |            |                                  |
| Excited state 17: | Singlet-A | 6.1637 eV | 201.15 nm | $f=0.0860$ | $\langle S^{*2} \rangle = 0.000$ |
| 131 -> 135        | -0.20656  |           |           |            |                                  |
| 131 -> 136        | 0.46038   |           |           |            |                                  |
| 131 -> 137        | 0.28950   |           |           |            |                                  |
| 131 -> 139        | -0.11340  |           |           |            |                                  |



|                   |           |           |           |            |                                  |
|-------------------|-----------|-----------|-----------|------------|----------------------------------|
| 131 -> 140        | 0.15121   |           |           |            |                                  |
| 132 -> 136        | -0.19021  |           |           |            |                                  |
| 132 -> 137        | -0.12731  |           |           |            |                                  |
| 132 -> 139        | 0.10332   |           |           |            |                                  |
| Excited state 18: | Singlet-A | 6.2187 eV | 199.37 nm | $f=0.0053$ | $\langle S^{*2} \rangle = 0.000$ |
| 131 -> 136        | -0.33055  |           |           |            |                                  |
| 131 -> 137        | 0.47388   |           |           |            |                                  |
| 131 -> 138        | -0.12260  |           |           |            |                                  |
| 132 -> 136        | 0.13742   |           |           |            |                                  |
| 132 -> 137        | -0.24009  |           |           |            |                                  |
| 132 -> 138        | 0.14982   |           |           |            |                                  |
| 132 -> 139        | -0.10485  |           |           |            |                                  |
| Excited state 19: | Singlet-A | 6.2600 eV | 198.06 nm | $f=0.0128$ | $\langle S^{*2} \rangle = 0.000$ |
| 131 -> 136        | 0.17028   |           |           |            |                                  |
| 131 -> 137        | -0.12752  |           |           |            |                                  |
| 131 -> 139        | -0.11234  |           |           |            |                                  |
| 132 -> 136        | 0.26751   |           |           |            |                                  |
| 132 -> 138        | 0.43242   |           |           |            |                                  |
| 132 -> 139        | -0.15415  |           |           |            |                                  |
| 132 -> 140        | -0.27282  |           |           |            |                                  |
| 132 -> 142        | 0.19526   |           |           |            |                                  |
| Excited state 20: | Singlet-A | 6.2869 eV | 197.21 nm | $f=0.0161$ | $\langle S^{*2} \rangle = 0.000$ |
| 121 -> 133        | 0.38630   |           |           |            |                                  |
| 122 -> 133        | 0.44883   |           |           |            |                                  |
| 124 -> 133        | -0.35085  |           |           |            |                                  |
| Excited state 21: | Singlet-A | 6.2968 eV | 196.90 nm | $f=0.0385$ | $\langle S^{*2} \rangle = 0.000$ |
| 131 -> 136        | -0.24518  |           |           |            |                                  |
| 131 -> 138        | -0.33954  |           |           |            |                                  |
| 131 -> 139        | -0.13057  |           |           |            |                                  |
| 131 -> 140        | 0.36390   |           |           |            |                                  |
| 131 -> 142        | 0.11343   |           |           |            |                                  |
| 132 -> 137        | 0.18734   |           |           |            |                                  |
| 132 -> 139        | 0.24199   |           |           |            |                                  |
| 132 -> 142        | -0.10641  |           |           |            |                                  |
| Excited state 22: | Singlet-A | 6.3277 eV | 195.94 nm | $f=0.0018$ | $\langle S^{*2} \rangle = 0.000$ |
| 131 -> 136        | 0.10063   |           |           |            |                                  |
| 131 -> 137        | 0.28858   |           |           |            |                                  |
| 132 -> 136        | 0.21289   |           |           |            |                                  |
| 132 -> 137        | 0.53503   |           |           |            |                                  |
| 132 -> 138        | -0.11303  |           |           |            |                                  |
| 132 -> 141        | -0.15692  |           |           |            |                                  |
| Excited state 23: | Singlet-A | 6.3448 eV | 195.41 nm | $f=0.0564$ | $\langle S^{*2} \rangle = 0.000$ |
| 131 -> 138        | 0.18625   |           |           |            |                                  |
| 131 -> 139        | 0.19109   |           |           |            |                                  |
| 131 -> 140        | -0.16338  |           |           |            |                                  |
| 132 -> 136        | -0.11290  |           |           |            |                                  |
| 132 -> 137        | 0.11425   |           |           |            |                                  |
| 132 -> 138        | 0.30559   |           |           |            |                                  |
| 132 -> 139        | 0.38731   |           |           |            |                                  |
| 132 -> 141        | 0.21202   |           |           |            |                                  |
| 132 -> 142        | 0.14127   |           |           |            |                                  |

|                       |           |           |           |            |                                  |
|-----------------------|-----------|-----------|-----------|------------|----------------------------------|
| 132 -> 143            | 0.15531   |           |           |            |                                  |
| Excited state 24:     | Singlet-A | 6.3764 eV | 194.44 nm | $f=0.0047$ | $\langle S^{*2} \rangle = 0.000$ |
| 131 -> 136            | -0.14955  |           |           |            |                                  |
| 131 -> 137            | 0.10297   |           |           |            |                                  |
| 131 -> 138            | 0.48441   |           |           |            |                                  |
| 131 -> 139            | -0.33181  |           |           |            |                                  |
| 131 -> 140            | 0.14096   |           |           |            |                                  |
| 131 -> 142            | 0.10035   |           |           |            |                                  |
| 132 -> 138            | -0.14579  |           |           |            |                                  |
| 132 -> 139            | 0.11964   |           |           |            |                                  |
| 132 -> 140            | -0.13103  |           |           |            |                                  |
| Excited state 25:     | Singlet-A | 6.3859 eV | 194.15 nm | $f=0.0071$ | $\langle S^{*2} \rangle = 0.000$ |
| 118 -> 133            | 0.14977   |           |           |            |                                  |
| 120 -> 133            | 0.29262   |           |           |            |                                  |
| 121 -> 133            | 0.45681   |           |           |            |                                  |
| 122 -> 133            | -0.40201  |           |           |            |                                  |
| Excited state 26:     | Singlet-A | 6.4923 eV | 190.97 nm | $f=0.0033$ | $\langle S^{*2} \rangle = 0.000$ |
| 117 -> 133            | -0.11972  |           |           |            |                                  |
| 118 -> 133            | 0.26930   |           |           |            |                                  |
| 119 -> 133            | -0.26645  |           |           |            |                                  |
| 120 -> 133            | 0.46646   |           |           |            |                                  |
| 121 -> 133            | -0.26226  |           |           |            |                                  |
| 122 -> 133            | 0.18147   |           |           |            |                                  |
| Excited state 27:     | Singlet-A | 6.5095 eV | 190.47 nm | $f=0.0057$ | $\langle S^{*2} \rangle = 0.000$ |
| 128 -> 134            | -0.20281  |           |           |            |                                  |
| 129 -> 134            | -0.16175  |           |           |            |                                  |
| 130 -> 134            | 0.58607   |           |           |            |                                  |
| 131 -> 139            | -0.11609  |           |           |            |                                  |
| 132 -> 140            | 0.17292   |           |           |            |                                  |
| Excited state 28:     | Singlet-A | 6.5243 eV | 190.04 nm | $f=0.0573$ | $\langle S^{*2} \rangle = 0.000$ |
| 130 -> 134            | 0.21388   |           |           |            |                                  |
| 131 -> 139            | 0.34889   |           |           |            |                                  |
| 131 -> 140            | 0.25665   |           |           |            |                                  |
| 131 -> 141            | -0.13780  |           |           |            |                                  |
| 132 -> 138            | -0.19288  |           |           |            |                                  |
| 132 -> 140            | -0.34120  |           |           |            |                                  |
| 132 -> 141            | 0.14255   |           |           |            |                                  |
| Excited state 29:     | Singlet-A | 6.5369 eV | 189.67 nm | $f=0.0932$ | $\langle S^{*2} \rangle = 0.000$ |
| 131 -> 138            | 0.21585   |           |           |            |                                  |
| 131 -> 139            | 0.14565   |           |           |            |                                  |
| 131 -> 140            | 0.37314   |           |           |            |                                  |
| 131 -> 141            | -0.13486  |           |           |            |                                  |
| 132 -> 138            | 0.22335   |           |           |            |                                  |
| 132 -> 139            | -0.14266  |           |           |            |                                  |
| 132 -> 140            | 0.37581   |           |           |            |                                  |
| Excited state 30:     | Singlet-A | 6.5915 eV | 188.10 nm | $f=0.0185$ | $\langle S^{*2} \rangle = 0.000$ |
| 128 -> 135            | 0.50718   |           |           |            |                                  |
| 128 -> 136            | -0.14493  |           |           |            |                                  |
| 129 -> 135            | 0.26445   |           |           |            |                                  |
| 130 -> 135            | 0.24721   |           |           |            |                                  |
| SavETr: write IOETrn= | 770       | NScale=   | 10        | NData=     | 16                               |
|                       |           | NLR=      | 1         | LETran=    | 520.                             |

\*\*\*\*\*

Rotatory strengths (R) in cgs ( $10^{*-40}$  erg-esu-cm/Gauss) of 17.

| State | XX        | YY        | ZZ        | R (length) | R (au)  |
|-------|-----------|-----------|-----------|------------|---------|
| 1     | 4.1574    | -11.3274  | -0.1800   | -2.4500    | -0.0052 |
| 2     | 0.0744    | -0.1512   | 0.0081    | -0.0229    | 0.0000  |
| 3     | -5.2782   | 11.4009   | -16.1027  | -3.3267    | -0.0071 |
| 4     | -59.7257  | 0.7700    | 20.5982   | -12.7858   | -0.0271 |
| 5     | 16.1287   | -18.5451  | 0.2087    | -0.7359    | -0.0016 |
| 6     | -1.4991   | 1.3527    | -1.8422   | -0.6628    | -0.0014 |
| 7     | 142.6095  | -164.6987 | 19.4156   | -0.8912    | -0.0019 |
| 8     | 0.2139    | -1.3627   | -2.5416   | -1.2301    | -0.0026 |
| 9     | 397.0452  | -388.9912 | 42.3392   | 16.7977    | 0.0356  |
| 10    | 2.6361    | -1.8247   | -0.2586   | 0.1843     | 0.0004  |
| 11    | 52.7309   | 10.8216   | 1.6186    | 21.7237    | 0.0461  |
| 12    | 12.7720   | 1.6006    | -66.2246  | -17.2840   | -0.0367 |
| 13    | 7.9062    | 40.1619   | -16.5679  | 10.5001    | 0.0223  |
| 14    | -113.1082 | 128.9081  | 19.7496   | 11.8498    | 0.0251  |
| 15    | -0.8101   | 73.6886   | -115.6543 | -14.2586   | -0.0302 |
| 16    | 27.1269   | 27.8119   | -6.4804   | 16.1528    | 0.0343  |
| 17    | -500.3329 | 150.6064  | 335.7579  | -4.6562    | -0.0099 |
| 18    | 0.5998    | -1.7329   | 5.1479    | 1.3383     | 0.0028  |
| 19    | 0.8323    | 64.4873   | -39.8331  | 8.4955     | 0.0180  |
| 20    | -0.8107   | 17.6170   | -47.7919  | -10.3285   | -0.0219 |
| 21    | 152.5761  | 19.6784   | -153.7494 | 6.1684     | 0.0131  |
| 22    | 24.4250   | -11.8657  | -1.7142   | 3.6150     | 0.0077  |
| 23    | 71.1283   | 164.5692  | -149.6147 | 28.6943    | 0.0609  |
| 24    | -0.4017   | 4.9305    | -18.3952  | -4.6222    | -0.0098 |
| 25    | -15.9984  | 11.3079   | 12.1851   | 2.4982     | 0.0053  |
| 26    | 3.1114    | -11.0571  | -6.4140   | -4.7866    | -0.0102 |
| 27    | -1.5249   | 17.9420   | -30.3905  | -4.6578    | -0.0099 |
| 28    | 83.6212   | 296.1333  | -436.4442 | -18.8966   | -0.0401 |
| 29    | 11.8564   | 36.7654   | -26.8597  | 7.2540     | 0.0154  |
| 30    | -132.6326 | -6.9115   | 33.4040   | -35.3801   | -0.0750 |

$1/2[ \langle 0 | \text{del} | b \rangle \langle b | r | 0 \rangle + (\langle 0 | r | b \rangle \langle b | \text{del} | 0 \rangle) ]$  (Au)

| State | X       | Y       | Z       | Dip. S. | Osc.(frdel) |
|-------|---------|---------|---------|---------|-------------|
| 1     | -0.0046 | -0.0028 | 0.0000  | 0.0074  | 0.0049      |
| 2     | 0.0000  | 0.0000  | 0.0000  | 0.0001  | 0.0001      |
| 3     | -0.0034 | -0.0005 | -0.0005 | 0.0044  | 0.0029      |
| 4     | -0.0172 | 0.0000  | -0.0006 | 0.0178  | 0.0119      |
| 5     | -0.0085 | -0.0034 | -0.0004 | 0.0122  | 0.0081      |
| 6     | -0.0021 | -0.0010 | -0.0001 | 0.0032  | 0.0021      |
| 7     | -0.1119 | -0.0393 | -0.0028 | 0.1540  | 0.1026      |

|    |         |         |         |        |        |
|----|---------|---------|---------|--------|--------|
| 8  | -0.0119 | 0.0000  | -0.0017 | 0.0136 | 0.0091 |
| 9  | -0.2131 | -0.0437 | -0.0302 | 0.2870 | 0.1913 |
| 10 | -0.0019 | -0.0001 | -0.0007 | 0.0027 | 0.0018 |
| 11 | -0.0227 | -0.0009 | 0.0000  | 0.0237 | 0.0158 |
| 12 | -0.0086 | -0.0009 | -0.0065 | 0.0160 | 0.0107 |
| 13 | -0.0167 | -0.0016 | -0.0229 | 0.0412 | 0.0275 |
| 14 | -0.0048 | -0.0149 | -0.0365 | 0.0562 | 0.0375 |
| 15 | 0.0000  | -0.0070 | -0.0287 | 0.0358 | 0.0238 |
| 16 | -0.0156 | -0.0038 | -0.0012 | 0.0205 | 0.0137 |
| 17 | -0.0939 | -0.0060 | -0.0345 | 0.1344 | 0.0896 |
| 18 | -0.0014 | 0.0000  | -0.0034 | 0.0047 | 0.0032 |
| 19 | -0.0001 | -0.0072 | -0.0097 | 0.0169 | 0.0113 |
| 20 | -0.0049 | -0.0004 | -0.0127 | 0.0180 | 0.0120 |
| 21 | -0.0535 | -0.0005 | -0.0170 | 0.0710 | 0.0473 |
| 22 | -0.0043 | -0.0038 | -0.0001 | 0.0082 | 0.0055 |
| 23 | -0.0203 | -0.0253 | -0.0231 | 0.0686 | 0.0457 |
| 24 | -0.0001 | -0.0001 | -0.0032 | 0.0035 | 0.0023 |
| 25 | -0.0025 | -0.0006 | -0.0026 | 0.0056 | 0.0038 |
| 26 | -0.0026 | -0.0042 | -0.0006 | 0.0074 | 0.0049 |
| 27 | -0.0025 | -0.0059 | -0.0036 | 0.0120 | 0.0080 |
| 28 | -0.1068 | -0.0549 | -0.0322 | 0.1940 | 0.1293 |
| 29 | -0.0119 | -0.0012 | -0.0003 | 0.0133 | 0.0089 |
| 30 | -0.0151 | -0.0007 | -0.0260 | 0.0418 | 0.0279 |

Ground to Excited state transition densities written to RWF 633

Excitation energies and oscillator strengths:

Excited state 1: Singlet-A 4.4348 eV 279.57 nm  $f=0.0051$   $\langle S^2 \rangle=0.000$   
131 -> 133 0.65477  
132 -> 133 -0.26155

This state for optimization and/or second-order correction.

Copying the Excited state density for this state as the 1-particle RhoCI density.

Excited state 2: Singlet-A 4.6036 eV 269.32 nm  $f=0.0001$   $\langle S^2 \rangle=0.000$   
131 -> 133 0.26229  
132 -> 133 0.65650

Excited state 3: Singlet-A 4.7764 eV 259.58 nm  $f=0.0028$   $\langle S^2 \rangle=0.000$   
125 -> 133 0.53993  
127 -> 133 0.28753  
128 -> 133 0.25808  
129 -> 133 -0.18814

Excited state 4: Singlet-A 5.2924 eV 234.27 nm  $f=0.0120$   $\langle S^2 \rangle=0.000$   
127 -> 134 -0.12393  
129 -> 134 -0.22440  
130 -> 134 -0.10618  
131 -> 134 0.59435  
131 -> 135 0.15110

|                   |           |           |           |            |                                  |
|-------------------|-----------|-----------|-----------|------------|----------------------------------|
| Excited state 5:  | Singlet-A | 5.3784 eV | 230.52 nm | $f=0.0083$ | $\langle S^{*2} \rangle = 0.000$ |
| 128 -> 133        | 0.10264   |           |           |            |                                  |
| 129 -> 133        | 0.29687   |           |           |            |                                  |
| 130 -> 133        | 0.62402   |           |           |            |                                  |
| Excited state 6:  | Singlet-A | 5.4405 eV | 227.89 nm | $f=0.0022$ | $\langle S^{*2} \rangle = 0.000$ |
| 125 -> 133        | 0.13443   |           |           |            |                                  |
| 127 -> 133        | -0.20064  |           |           |            |                                  |
| 128 -> 133        | 0.28845   |           |           |            |                                  |
| 129 -> 133        | 0.51916   |           |           |            |                                  |
| 130 -> 133        | -0.29544  |           |           |            |                                  |
| Excited state 7:  | Singlet-A | 5.5038 eV | 225.27 nm | $f=0.1043$ | $\langle S^{*2} \rangle = 0.000$ |
| 123 -> 133        | -0.11959  |           |           |            |                                  |
| 127 -> 133        | 0.54999   |           |           |            |                                  |
| 128 -> 133        | -0.25792  |           |           |            |                                  |
| 129 -> 133        | 0.28763   |           |           |            |                                  |
| 130 -> 133        | -0.14440  |           |           |            |                                  |
| Excited state 8:  | Singlet-A | 5.6454 eV | 219.62 nm | $f=0.0091$ | $\langle S^{*2} \rangle = 0.000$ |
| 129 -> 134        | -0.10997  |           |           |            |                                  |
| 132 -> 134        | 0.67129   |           |           |            |                                  |
| 132 -> 135        | 0.12085   |           |           |            |                                  |
| Excited state 9:  | Singlet-A | 5.6759 eV | 218.44 nm | $f=0.1931$ | $\langle S^{*2} \rangle = 0.000$ |
| 125 -> 133        | -0.40508  |           |           |            |                                  |
| 127 -> 133        | 0.25786   |           |           |            |                                  |
| 128 -> 133        | 0.48559   |           |           |            |                                  |
| Excited state 10: | Singlet-A | 5.8288 eV | 212.71 nm | $f=0.0018$ | $\langle S^{*2} \rangle = 0.000$ |
| 126 -> 133        | 0.70290   |           |           |            |                                  |
| Excited state 11: | Singlet-A | 5.9099 eV | 209.79 nm | $f=0.0158$ | $\langle S^{*2} \rangle = 0.000$ |
| 127 -> 134        | 0.24116   |           |           |            |                                  |
| 128 -> 134        | 0.18735   |           |           |            |                                  |
| 129 -> 134        | 0.39609   |           |           |            |                                  |
| 130 -> 134        | 0.21578   |           |           |            |                                  |
| 131 -> 134        | 0.29219   |           |           |            |                                  |
| 131 -> 135        | 0.16154   |           |           |            |                                  |
| 132 -> 134        | 0.16121   |           |           |            |                                  |
| Excited state 12: | Singlet-A | 5.9280 eV | 209.15 nm | $f=0.0109$ | $\langle S^{*2} \rangle = 0.000$ |
| 132 -> 135        | 0.26071   |           |           |            |                                  |
| 132 -> 136        | 0.46316   |           |           |            |                                  |
| 132 -> 137        | 0.21937   |           |           |            |                                  |
| 132 -> 139        | 0.28408   |           |           |            |                                  |
| 132 -> 140        | -0.13888  |           |           |            |                                  |
| 132 -> 141        | 0.14559   |           |           |            |                                  |
| Excited state 13: | Singlet-A | 5.9556 eV | 208.18 nm | $f=0.0273$ | $\langle S^{*2} \rangle = 0.000$ |
| 120 -> 133        | 0.10614   |           |           |            |                                  |
| 123 -> 133        | 0.57040   |           |           |            |                                  |
| 124 -> 133        | -0.33085  |           |           |            |                                  |
| 128 -> 133        | -0.11056  |           |           |            |                                  |
| 129 -> 133        | 0.10593   |           |           |            |                                  |

|                   |           |           |           |            |                                  |
|-------------------|-----------|-----------|-----------|------------|----------------------------------|
| Excited state 14: | Singlet-A | 5.9817 eV | 207.27 nm | $f=0.0375$ | $\langle S^{*2} \rangle = 0.000$ |
| 131 -> 134        | -0.16307  |           |           |            |                                  |
| 131 -> 135        | 0.54489   |           |           |            |                                  |
| 131 -> 136        | 0.12695   |           |           |            |                                  |
| 131 -> 137        | -0.12901  |           |           |            |                                  |
| 131 -> 138        | -0.21530  |           |           |            |                                  |
| 132 -> 135        | -0.18479  |           |           |            |                                  |
| Excited state 15: | Singlet-A | 6.0559 eV | 204.73 nm | $f=0.0240$ | $\langle S^{*2} \rangle = 0.000$ |
| 121 -> 133        | 0.15054   |           |           |            |                                  |
| 122 -> 133        | 0.28330   |           |           |            |                                  |
| 123 -> 133        | 0.28672   |           |           |            |                                  |
| 124 -> 133        | 0.51512   |           |           |            |                                  |
| 132 -> 135        | 0.12716   |           |           |            |                                  |
| Excited state 16: | Singlet-A | 6.0576 eV | 204.68 nm | $f=0.0137$ | $\langle S^{*2} \rangle = 0.000$ |
| 124 -> 133        | -0.11487  |           |           |            |                                  |
| 131 -> 135        | 0.21377   |           |           |            |                                  |
| 132 -> 134        | -0.10213  |           |           |            |                                  |
| 132 -> 135        | 0.58438   |           |           |            |                                  |
| 132 -> 136        | -0.23206  |           |           |            |                                  |
| Excited state 17: | Singlet-A | 6.1691 eV | 200.98 nm | $f=0.0893$ | $\langle S^{*2} \rangle = 0.000$ |
| 131 -> 134        | 0.13305   |           |           |            |                                  |
| 131 -> 135        | -0.24383  |           |           |            |                                  |
| 131 -> 136        | 0.39930   |           |           |            |                                  |
| 131 -> 137        | -0.26794  |           |           |            |                                  |
| 131 -> 138        | -0.27628  |           |           |            |                                  |
| 131 -> 140        | -0.15066  |           |           |            |                                  |
| 132 -> 136        | -0.12606  |           |           |            |                                  |
| Excited state 18: | Singlet-A | 6.2322 eV | 198.94 nm | $f=0.0032$ | $\langle S^{*2} \rangle = 0.000$ |
| 131 -> 136        | 0.37247   |           |           |            |                                  |
| 131 -> 137        | 0.21561   |           |           |            |                                  |
| 131 -> 138        | 0.27609   |           |           |            |                                  |
| 131 -> 142        | -0.10467  |           |           |            |                                  |
| 132 -> 136        | -0.25310  |           |           |            |                                  |
| 132 -> 138        | -0.28614  |           |           |            |                                  |
| 132 -> 139        | 0.17298   |           |           |            |                                  |
| 132 -> 141        | 0.10088   |           |           |            |                                  |
| Excited state 19: | Singlet-A | 6.2560 eV | 198.19 nm | $f=0.0114$ | $\langle S^{*2} \rangle = 0.000$ |
| 121 -> 133        | 0.37025   |           |           |            |                                  |
| 122 -> 133        | 0.46947   |           |           |            |                                  |
| 123 -> 133        | -0.14475  |           |           |            |                                  |
| 124 -> 133        | -0.31198  |           |           |            |                                  |
| Excited state 20: | Singlet-A | 6.2611 eV | 198.02 nm | $f=0.0122$ | $\langle S^{*2} \rangle = 0.000$ |
| 131 -> 136        | 0.35266   |           |           |            |                                  |
| 131 -> 137        | 0.16169   |           |           |            |                                  |
| 131 -> 138        | 0.17218   |           |           |            |                                  |
| 132 -> 136        | 0.25581   |           |           |            |                                  |
| 132 -> 137        | -0.16511  |           |           |            |                                  |
| 132 -> 138        | 0.27653   |           |           |            |                                  |
| 132 -> 139        | -0.19985  |           |           |            |                                  |
| 132 -> 140        | 0.12134   |           |           |            |                                  |
| 132 -> 141        | -0.18627  |           |           |            |                                  |

|                   |           |           |           |            |                                  |
|-------------------|-----------|-----------|-----------|------------|----------------------------------|
| 132 -> 142        | 0.15064   |           |           |            |                                  |
| Excited state 21: | Singlet-A | 6.3118 eV | 196.43 nm | $f=0.0475$ | $\langle S^{*2} \rangle = 0.000$ |
| 131 -> 137        | 0.38005   |           |           |            |                                  |
| 131 -> 138        | -0.27002  |           |           |            |                                  |
| 131 -> 140        | -0.23951  |           |           |            |                                  |
| 132 -> 137        | -0.30282  |           |           |            |                                  |
| 132 -> 138        | 0.12654   |           |           |            |                                  |
| 132 -> 139        | 0.26020   |           |           |            |                                  |
| Excited state 22: | Singlet-A | 6.3317 eV | 195.81 nm | $f=0.0057$ | $\langle S^{*2} \rangle = 0.000$ |
| 120 -> 133        | -0.36927  |           |           |            |                                  |
| 121 -> 133        | 0.40113   |           |           |            |                                  |
| 122 -> 133        | -0.39152  |           |           |            |                                  |
| 123 -> 133        | 0.12810   |           |           |            |                                  |
| Excited state 23: | Singlet-A | 6.3431 eV | 195.46 nm | $f=0.0465$ | $\langle S^{*2} \rangle = 0.000$ |
| 131 -> 137        | -0.21792  |           |           |            |                                  |
| 131 -> 138        | 0.24453   |           |           |            |                                  |
| 131 -> 140        | 0.13007   |           |           |            |                                  |
| 132 -> 136        | -0.10063  |           |           |            |                                  |
| 132 -> 138        | 0.34313   |           |           |            |                                  |
| 132 -> 139        | 0.32265   |           |           |            |                                  |
| 132 -> 142        | 0.26116   |           |           |            |                                  |
| 132 -> 143        | 0.12226   |           |           |            |                                  |
| Excited state 24: | Singlet-A | 6.3597 eV | 194.95 nm | $f=0.0024$ | $\langle S^{*2} \rangle = 0.000$ |
| 131 -> 137        | 0.28506   |           |           |            |                                  |
| 132 -> 136        | -0.19557  |           |           |            |                                  |
| 132 -> 137        | 0.49472   |           |           |            |                                  |
| 132 -> 138        | 0.22266   |           |           |            |                                  |
| 132 -> 142        | 0.18971   |           |           |            |                                  |
| Excited state 25: | Singlet-A | 6.4178 eV | 193.19 nm | $f=0.0038$ | $\langle S^{*2} \rangle = 0.000$ |
| 131 -> 136        | 0.14791   |           |           |            |                                  |
| 131 -> 137        | 0.15673   |           |           |            |                                  |
| 131 -> 138        | -0.23416  |           |           |            |                                  |
| 131 -> 139        | 0.44653   |           |           |            |                                  |
| 131 -> 140        | 0.32466   |           |           |            |                                  |
| 131 -> 142        | -0.11122  |           |           |            |                                  |
| 131 -> 145        | 0.10525   |           |           |            |                                  |
| 132 -> 139        | -0.10252  |           |           |            |                                  |
| 132 -> 140        | -0.15249  |           |           |            |                                  |
| Excited state 26: | Singlet-A | 6.4541 eV | 192.10 nm | $f=0.0050$ | $\langle S^{*2} \rangle = 0.000$ |
| 118 -> 133        | -0.26235  |           |           |            |                                  |
| 119 -> 133        | -0.21195  |           |           |            |                                  |
| 120 -> 133        | 0.45551   |           |           |            |                                  |
| 121 -> 133        | 0.34815   |           |           |            |                                  |
| 122 -> 133        | -0.16917  |           |           |            |                                  |
| Excited state 27: | Singlet-A | 6.5391 eV | 189.60 nm | $f=0.0080$ | $\langle S^{*2} \rangle = 0.000$ |
| 129 -> 134        | -0.11917  |           |           |            |                                  |
| 129 -> 135        | -0.17294  |           |           |            |                                  |
| 130 -> 134        | 0.44101   |           |           |            |                                  |
| 131 -> 139        | -0.19892  |           |           |            |                                  |
| 131 -> 140        | 0.10061   |           |           |            |                                  |

|                   |           |           |           |            |                                  |
|-------------------|-----------|-----------|-----------|------------|----------------------------------|
| 132 -> 138        | 0.11005   |           |           |            |                                  |
| 132 -> 140        | -0.35213  |           |           |            |                                  |
| 132 -> 142        | -0.11173  |           |           |            |                                  |
| Excited state 28: | Singlet-A | 6.5512 eV | 189.25 nm | $f=0.1315$ | $\langle S^{*2} \rangle = 0.000$ |
| 129 -> 134        | -0.17327  |           |           |            |                                  |
| 130 -> 134        | 0.43169   |           |           |            |                                  |
| 131 -> 139        | 0.12075   |           |           |            |                                  |
| 132 -> 138        | -0.13713  |           |           |            |                                  |
| 132 -> 140        | 0.43351   |           |           |            |                                  |
| 132 -> 142        | 0.11461   |           |           |            |                                  |
| Excited state 29: | Singlet-A | 6.5576 eV | 189.07 nm | $f=0.0089$ | $\langle S^{*2} \rangle = 0.000$ |
| 129 -> 134        | 0.14209   |           |           |            |                                  |
| 129 -> 135        | -0.15851  |           |           |            |                                  |
| 130 -> 134        | -0.14373  |           |           |            |                                  |
| 130 -> 135        | -0.14528  |           |           |            |                                  |
| 131 -> 138        | -0.16542  |           |           |            |                                  |
| 131 -> 139        | -0.22186  |           |           |            |                                  |
| 131 -> 140        | 0.41945   |           |           |            |                                  |
| 131 -> 141        | 0.11996   |           |           |            |                                  |
| 131 -> 142        | 0.17978   |           |           |            |                                  |
| 132 -> 139        | 0.13419   |           |           |            |                                  |
| 132 -> 140        | 0.20375   |           |           |            |                                  |
| Excited state 30: | Singlet-A | 6.5801 eV | 188.42 nm | $f=0.0280$ | $\langle S^{*2} \rangle = 0.000$ |
| 127 -> 134        | 0.18909   |           |           |            |                                  |
| 128 -> 135        | 0.17690   |           |           |            |                                  |
| 129 -> 134        | -0.23923  |           |           |            |                                  |
| 129 -> 135        | 0.41532   |           |           |            |                                  |
| 129 -> 136        | -0.12035  |           |           |            |                                  |
| 130 -> 135        | 0.19187   |           |           |            |                                  |
| 131 -> 139        | -0.16483  |           |           |            |                                  |
| 131 -> 140        | 0.19932   |           |           |            |                                  |
| 132 -> 142        | -0.10380  |           |           |            |                                  |

SavETr: write IOETrn= 770 NScale= 10 NData= 16 NLR=1 LETran= 520.

\*\*\*\*\*

Rotatory strengths (R) in cgs ( $10^{-40}$  erg-esu-cm/Gauss) of **18**.

| State | XX        | YY        | ZZ         | R (length) | R (au)  |
|-------|-----------|-----------|------------|------------|---------|
| 1     | -5.0431   | 2.1170    | 0.5369     | -0.7964    | -0.0017 |
| 2     | -0.0633   | 14.0081   | -6.7088    | 2.4120     | 0.0051  |
| 3     | 5.8670    | -13.9740  | -0.6993    | -2.9354    | -0.0062 |
| 4     | -187.4444 | 137.6408  | -21.5089   | -23.7708   | -0.0504 |
| 5     | -3.4476   | 11.4023   | -16.0406   | -2.6953    | -0.0057 |
| 6     | 0.0147    | -0.0025   | -0.0356    | -0.0078    | 0.0000  |
| 7     | 55.6499   | 1069.0352 | -1023.1566 | 33.8428    | 0.0718  |
| 8     | 0.2123    | 1.2850    | -0.4149    | 0.3608     | 0.0008  |
| 9     | -56.0858  | 6.0394    | 20.7789    | -9.7558    | -0.0207 |
| 10    | -1.4157   | 0.5506    | -0.9853    | -0.6168    | -0.0013 |
| 11    | 25.4180   | -52.8392  | 13.0409    | -4.7934    | -0.0102 |
| 12    | 19.0352   | 126.1661  | -177.6048  | -10.8012   | -0.0229 |



|    |           |           |          |          |         |
|----|-----------|-----------|----------|----------|---------|
| 13 | 9.5509    | -11.3221  | 0.9239   | -0.2824  | -0.0006 |
| 14 | 0.3673    | 2.4816    | -17.3444 | -4.8318  | -0.0102 |
| 15 | 299.5809  | -368.3777 | 60.2210  | -2.8586  | -0.0061 |
| 16 | -17.1272  | 1.9085    | -4.7106  | -6.6431  | -0.0141 |
| 17 | 0.5845    | -0.1832   | 0.0862   | 0.1625   | 0.0003  |
| 18 | 146.8085  | -89.2414  | -13.6808 | 14.6288  | 0.0310  |
| 19 | 42.8743   | -86.2930  | 43.6193  | 0.0668   | 0.0001  |
| 20 | -0.7795   | 89.6149   | -27.5020 | 20.4444  | 0.0434  |
| 21 | -169.0300 | 51.3756   | -50.3915 | -56.0153 | -0.1188 |
| 22 | 5.5277    | 5.4648    | -24.7772 | -4.5949  | -0.0097 |
| 23 | 32.8897   | 81.2979   | -74.6557 | 13.1773  | 0.0280  |
| 24 | 26.5907   | -5.9441   | -2.0744  | 6.1907   | 0.0131  |
| 25 | 48.1958   | 0.0811    | -29.7503 | 6.1755   | 0.0131  |
| 26 | -13.2713  | 104.0023  | 11.8159  | 34.1823  | 0.0725  |
| 27 | -5.9628   | -4.2993   | -17.8780 | -9.3800  | -0.0199 |
| 28 | -24.9308  | 133.9419  | -39.5912 | 23.1399  | 0.0491  |
| 29 | 10.1857   | -22.8381  | -6.9469  | -6.5331  | -0.0139 |
| 30 | -315.2182 | 125.3965  | 356.7215 | 55.6333  | 0.1180  |

$1/2[\langle 0|\text{del}|b\rangle*\langle b|r|0\rangle + (\langle 0|r|b\rangle*\langle b|\text{del}|0\rangle)^*]$  (Au)

| State | X       | Y       | Z       | Dip. S. | Osc.(frdel) |
|-------|---------|---------|---------|---------|-------------|
| 1     | -0.0001 | 0.0000  | 0.0000  | 0.0001  | 0.0001      |
| 2     | 0.0000  | -0.0037 | -0.0001 | 0.0038  | 0.0025      |
| 3     | -0.0047 | -0.0034 | 0.0000  | 0.0081  | 0.0054      |
| 4     | -0.2123 | -0.1439 | 0.0000  | 0.3562  | 0.2375      |
| 5     | -0.0033 | -0.0008 | -0.0005 | 0.0046  | 0.0031      |
| 6     | 0.0000  | 0.0000  | 0.0000  | 0.0000  | 0.0000      |
| 7     | -0.0358 | -0.1485 | -0.0877 | 0.2720  | 0.1813      |
| 8     | -0.0005 | -0.0008 | -0.0001 | 0.0013  | 0.0009      |
| 9     | -0.0151 | -0.0002 | -0.0011 | 0.0163  | 0.0109      |
| 10    | -0.0006 | -0.0001 | -0.0003 | 0.0009  | 0.0006      |
| 11    | -0.0686 | -0.0273 | -0.0005 | 0.0963  | 0.0642      |
| 12    | -0.0059 | -0.0127 | -0.0219 | 0.0405  | 0.0270      |
| 13    | -0.0060 | -0.0031 | -0.0002 | 0.0093  | 0.0062      |
| 14    | 0.0000  | -0.0001 | -0.0019 | 0.0020  | 0.0013      |
| 15    | -0.1560 | -0.0634 | -0.0122 | 0.2316  | 0.1544      |
| 16    | -0.0007 | 0.0000  | -0.0004 | 0.0011  | 0.0007      |
| 17    | 0.0000  | -0.0003 | 0.0000  | 0.0003  | 0.0002      |
| 18    | -0.0809 | -0.0040 | -0.0164 | 0.1013  | 0.0675      |
| 19    | -0.0118 | -0.0117 | -0.0060 | 0.0295  | 0.0197      |
| 20    | 0.0000  | -0.0159 | -0.0048 | 0.0208  | 0.0139      |
| 21    | -0.0125 | -0.0038 | -0.0334 | 0.0496  | 0.0331      |
| 22    | -0.0016 | -0.0027 | -0.0024 | 0.0067  | 0.0045      |

|    |         |         |         |        |        |
|----|---------|---------|---------|--------|--------|
| 23 | -0.0128 | -0.0023 | -0.0630 | 0.0781 | 0.0521 |
| 24 | -0.0088 | -0.0007 | 0.0000  | 0.0096 | 0.0064 |
| 25 | -0.0173 | -0.0001 | -0.0052 | 0.0227 | 0.0151 |
| 26 | -0.0079 | -0.0271 | -0.0001 | 0.0351 | 0.0234 |
| 27 | -0.0024 | -0.0002 | -0.0022 | 0.0048 | 0.0032 |
| 28 | -0.0302 | -0.0744 | -0.0002 | 0.1047 | 0.0698 |
| 29 | -0.0115 | -0.0072 | -0.0001 | 0.0189 | 0.0126 |
| 30 | -0.0267 | -0.0062 | -0.0535 | 0.0864 | 0.0576 |

Ground to Excited state transition densities written to RWF 633

Excitation energies and oscillator strengths:

Excited state 1: Singlet-A 3.5567 eV 348.59 nm  $f=0.0001$   $\langle S^{*2} \rangle=0.000$   
130 ->132 0.69533

This state for optimization and/or second-order correction.

Copying the Excited state density for this state as the 1-particle RhoCI density.

Excited state 2: Singlet-A 4.3807 eV 283.03 nm  $f=0.0026$   $\langle S^{*2} \rangle=0.000$   
131 ->132 0.70239

Excited state 3: Singlet-A 4.4851 eV 276.44 nm  $f=0.0056$   $\langle S^{*2} \rangle=0.000$   
131 ->133 0.70315

Excited state 4: Singlet-A 4.5761 eV 270.94 nm  $f=0.2384$   $\langle S^{*2} \rangle=0.000$   
128 ->132 0.11325  
129 ->132 0.68161

Excited state 5: Singlet-A 4.7871 eV 258.99 nm  $f=0.0030$   $\langle S^{*2} \rangle=0.000$   
124 ->133 0.51817  
125 ->133 0.30251  
126 ->133 -0.30796  
127 ->133 0.13784

Excited state 6: Singlet-A 4.9095 eV 252.54 nm  $f=0.0000$   $\langle S^{*2} \rangle=0.000$   
130 ->133 0.70257

Excited state 7: Singlet-A 4.9602 eV 249.96 nm  $f=0.1866$   $\langle S^{*2} \rangle=0.000$   
128 ->132 0.67972  
129 ->132 -0.10643

Excited state 8: Singlet-A 4.9904 eV 248.44 nm  $f=0.0009$   $\langle S^{*2} \rangle=0.000$   
129 ->133 0.70146

Excited state 9: Singlet-A 5.2537 eV 235.99 nm  $f=0.0110$   $\langle S^{*2} \rangle=0.000$   
125 ->134 -0.21040  
126 ->134 -0.11295  
128 ->134 0.12273  
129 ->134 -0.10114  
131 ->134 0.61535

Excited state 10: Singlet-A 5.2631 eV 235.57 nm  $f=0.0006$   $\langle S^{*2} \rangle=0.000$   
126 ->132 0.13824  
127 ->132 0.68860

|                   |           |           |           |            |                                   |
|-------------------|-----------|-----------|-----------|------------|-----------------------------------|
| Excited state 11: | Singlet-A | 5.3174 eV | 233.17 nm | $f=0.0649$ | $\langle S^{**2} \rangle = 0.000$ |
| 126 ->133         | 0.35378   |           |           |            |                                   |
| 127 ->133         | 0.59981   |           |           |            |                                   |
| Excited state 12: | Singlet-A | 5.3463 eV | 231.90 nm | $f=0.0280$ | $\langle S^{**2} \rangle = 0.000$ |
| 125 ->132         | 0.51438   |           |           |            |                                   |
| 126 ->132         | 0.45491   |           |           |            |                                   |
| Excited state 13: | Singlet-A | 5.3789 eV | 230.50 nm | $f=0.0063$ | $\langle S^{**2} \rangle = 0.000$ |
| 125 ->133         | -0.10424  |           |           |            |                                   |
| 128 ->133         | 0.68923   |           |           |            |                                   |
| Excited state 14: | Singlet-A | 5.4564 eV | 227.23 nm | $f=0.0014$ | $\langle S^{**2} \rangle = 0.000$ |
| 125 ->132         | -0.43827  |           |           |            |                                   |
| 126 ->132         | 0.51871   |           |           |            |                                   |
| 127 ->132         | -0.14167  |           |           |            |                                   |
| Excited state 15: | Singlet-A | 5.5533 eV | 223.26 nm | $f=0.1568$ | $\langle S^{**2} \rangle = 0.000$ |
| 123 ->133         | -0.18991  |           |           |            |                                   |
| 124 ->133         | 0.21238   |           |           |            |                                   |
| 125 ->133         | 0.28814   |           |           |            |                                   |
| 126 ->133         | 0.47505   |           |           |            |                                   |
| 127 ->133         | -0.27219  |           |           |            |                                   |
| 128 ->133         | 0.14143   |           |           |            |                                   |
| Excited state 16: | Singlet-A | 5.5700 eV | 222.59 nm | $f=0.0010$ | $\langle S^{**2} \rangle = 0.000$ |
| 130 ->134         | -0.15963  |           |           |            |                                   |
| 130 ->135         | 0.63693   |           |           |            |                                   |
| 130 ->136         | 0.20756   |           |           |            |                                   |
| Excited state 17: | Singlet-A | 5.7231 eV | 216.64 nm | $f=0.0002$ | $\langle S^{**2} \rangle = 0.000$ |
| 122 ->132         | -0.13117  |           |           |            |                                   |
| 124 ->132         | 0.67513   |           |           |            |                                   |
| 125 ->132         | 0.14732   |           |           |            |                                   |
| Excited state 18: | Singlet-A | 5.7510 eV | 215.59 nm | $f=0.0677$ | $\langle S^{**2} \rangle = 0.000$ |
| 124 ->133         | -0.26205  |           |           |            |                                   |
| 125 ->133         | 0.36057   |           |           |            |                                   |
| 125 ->134         | -0.26619  |           |           |            |                                   |
| 126 ->134         | -0.12104  |           |           |            |                                   |
| 128 ->134         | 0.17619   |           |           |            |                                   |
| 129 ->134         | -0.30022  |           |           |            |                                   |
| 131 ->134         | -0.22059  |           |           |            |                                   |
| Excited state 19: | Singlet-A | 5.7606 eV | 215.23 nm | $f=0.0199$ | $\langle S^{**2} \rangle = 0.000$ |
| 124 ->133         | -0.30377  |           |           |            |                                   |
| 125 ->133         | 0.41085   |           |           |            |                                   |
| 125 ->134         | 0.23051   |           |           |            |                                   |
| 126 ->134         | 0.10283   |           |           |            |                                   |
| 127 ->133         | 0.11074   |           |           |            |                                   |
| 128 ->134         | -0.15407  |           |           |            |                                   |
| 129 ->134         | 0.26587   |           |           |            |                                   |
| 131 ->134         | 0.18887   |           |           |            |                                   |
| Excited state 20: | Singlet-A | 5.7727 eV | 214.78 nm | $f=0.0141$ | $\langle S^{**2} \rangle = 0.000$ |
| 122 ->132         | 0.66305   |           |           |            |                                   |
| 124 ->132         | 0.15034   |           |           |            |                                   |

|                   |           |           |           |            |                                   |
|-------------------|-----------|-----------|-----------|------------|-----------------------------------|
| Excited state 21: | Singlet-A | 5.9664 eV | 207.81 nm | $f=0.0332$ | $\langle S^{**2} \rangle = 0.000$ |
| 131 ->135         | 0.53448   |           |           |            |                                   |
| 131 ->136         | -0.36238  |           |           |            |                                   |
| 131 ->137         | -0.15845  |           |           |            |                                   |
| Excited state 22: | Singlet-A | 5.9926 eV | 206.89 nm | $f=0.0045$ | $\langle S^{**2} \rangle = 0.000$ |
| 130 ->134         | 0.67229   |           |           |            |                                   |
| 130 ->135         | 0.13960   |           |           |            |                                   |
| Excited state 23: | Singlet-A | 5.9994 eV | 206.66 nm | $f=0.0520$ | $\langle S^{**2} \rangle = 0.000$ |
| 121 ->133         | 0.14708   |           |           |            |                                   |
| 123 ->132         | 0.10879   |           |           |            |                                   |
| 123 ->133         | 0.62321   |           |           |            |                                   |
| 126 ->133         | 0.17679   |           |           |            |                                   |
| 127 ->133         | -0.11864  |           |           |            |                                   |
| Excited state 24: | Singlet-A | 6.0072 eV | 206.39 nm | $f=0.0064$ | $\langle S^{**2} \rangle = 0.000$ |
| 118 ->132         | -0.10395  |           |           |            |                                   |
| 120 ->132         | 0.15154   |           |           |            |                                   |
| 121 ->132         | -0.28764  |           |           |            |                                   |
| 123 ->132         | 0.55475   |           |           |            |                                   |
| 123 ->133         | -0.11759  |           |           |            |                                   |
| 131 ->136         | -0.15388  |           |           |            |                                   |
| Excited state 25: | Singlet-A | 6.0322 eV | 205.54 nm | $f=0.0151$ | $\langle S^{**2} \rangle = 0.000$ |
| 123 ->132         | 0.13360   |           |           |            |                                   |
| 131 ->135         | 0.44114   |           |           |            |                                   |
| 131 ->136         | 0.47357   |           |           |            |                                   |
| 131 ->137         | 0.14807   |           |           |            |                                   |
| 131 ->140         | -0.11208  |           |           |            |                                   |
| Excited state 26: | Singlet-A | 6.1056 eV | 203.07 nm | $f=0.0237$ | $\langle S^{**2} \rangle = 0.000$ |
| 120 ->132         | -0.14418  |           |           |            |                                   |
| 121 ->132         | 0.16613   |           |           |            |                                   |
| 123 ->132         | 0.18238   |           |           |            |                                   |
| 125 ->134         | -0.21245  |           |           |            |                                   |
| 126 ->134         | -0.11114  |           |           |            |                                   |
| 128 ->134         | 0.19448   |           |           |            |                                   |
| 129 ->134         | 0.45104   |           |           |            |                                   |
| 129 ->135         | -0.26517  |           |           |            |                                   |
| Excited state 27: | Singlet-A | 6.1144 eV | 202.77 nm | $f=0.0032$ | $\langle S^{**2} \rangle = 0.000$ |
| 120 ->132         | -0.29162  |           |           |            |                                   |
| 121 ->132         | 0.37951   |           |           |            |                                   |
| 123 ->132         | 0.33104   |           |           |            |                                   |
| 125 ->134         | 0.12352   |           |           |            |                                   |
| 128 ->134         | -0.11967  |           |           |            |                                   |
| 129 ->134         | -0.26725  |           |           |            |                                   |
| Excited state 28: | Singlet-A | 6.1545 eV | 201.45 nm | $f=0.0705$ | $\langle S^{**2} \rangle = 0.000$ |
| 121 ->132         | 0.14831   |           |           |            |                                   |
| 128 ->134         | 0.13914   |           |           |            |                                   |
| 128 ->135         | -0.13642  |           |           |            |                                   |
| 129 ->134         | 0.17195   |           |           |            |                                   |
| 129 ->135         | 0.59379   |           |           |            |                                   |
| 129 ->136         | 0.10624   |           |           |            |                                   |

Excited state 29: Singlet-A 6.1688 eV 200.99 nm  $f=0.0132$   $\langle S^{*2} \rangle=0.000$   
 120 ->133 0.30294  
 121 ->133 0.51701  
 122 ->133 -0.29859

Excited state 30: Singlet-A 6.1794 eV 200.64 nm  $f=0.0572$   $\langle S^{*2} \rangle=0.000$   
 121 ->133 0.11181  
 129 ->136 0.10640  
 131 ->134 0.10917  
 131 ->136 -0.24232  
 131 ->137 0.57160  
 131 ->138 -0.13793  
 131 ->140 -0.10325

SavETr: write IOETrn= 770 NScale= 10 NData= 16 NLR=1 LETran= 520.

\*\*\*\*\*

Rotatory strengths (R) in cgs ( $10^{*-40}$  erg-esu-cm/Gauss) of **22**.

| State | XX        | YY       | ZZ        | R (length) | R (au)  |
|-------|-----------|----------|-----------|------------|---------|
| 1     | -12.0630  | 37.0323  | -10.5883  | 4.7937     | 0.0102  |
| 2     | -0.0830   | 0.1665   | 0.0302    | 0.0379     | 0.0001  |
| 3     | 41.8996   | -15.5676 | -17.9269  | 2.8017     | 0.0059  |
| 4     | 1.9714    | 1.1988   | -5.7939   | -0.8746    | -0.0019 |
| 5     | -59.9966  | -17.0357 | 167.5572  | 30.1750    | 0.0640  |
| 6     | -0.3573   | 0.5658   | 0.1732    | 0.1272     | 0.0003  |
| 7     | -5.7456   | 2.5743   | 10.6124   | 2.4804     | 0.0053  |
| 8     | -33.8246  | 40.7656  | -9.6291   | -0.8960    | -0.0019 |
| 9     | -43.0155  | 54.6420  | -96.8375  | -28.4037   | -0.0602 |
| 10    | -0.0345   | 33.0577  | -31.7731  | 0.4167     | 0.0009  |
| 11    | -12.7199  | 41.3153  | -15.5412  | 4.3514     | 0.0092  |
| 12    | -204.2058 | 59.9258  | 104.8919  | -13.1294   | -0.0278 |
| 13    | -16.1599  | 242.8847 | -349.3178 | -40.8643   | -0.0867 |
| 14    | 27.1865   | 74.5483  | 75.0539   | 58.9296    | 0.1250  |
| 15    | -28.5483  | 7.5555   | -184.4084 | -68.4671   | -0.1452 |
| 16    | 3.2470    | 77.4158  | -81.9200  | -0.4191    | -0.0009 |
| 17    | -4.0730   | -0.5184  | -0.3696   | -1.6536    | -0.0035 |
| 18    | 4.4840    | 4.6380   | -4.0413   | 1.6936     | 0.0036  |
| 19    | -1.3929   | 17.2933  | -31.8956  | -5.3317    | -0.0113 |
| 20    | 0.5105    | 11.9722  | 10.2744   | 7.5857     | 0.0161  |
| 21    | -4.7649   | -21.1510 | -1.9396   | -9.2852    | -0.0197 |
| 22    | -37.4113  | -6.7478  | -61.6627  | -35.2739   | -0.0748 |
| 23    | -0.8352   | 68.2991  | 1.3087    | 22.9242    | 0.0486  |
| 24    | -0.6870   | 7.6762   | -47.9755  | -13.6621   | -0.0290 |
| 25    | -15.3618  | 190.6105 | -49.6136  | 41.8784    | 0.0888  |
| 26    | -15.4050  | 0.2823   | -9.6479   | -8.2569    | -0.0175 |
| 27    | -4.7049   | 18.9500  | -14.7214  | -0.1588    | -0.0003 |
| 28    | 14.0616   | 23.7172  | 10.7092   | 16.1627    | 0.0343  |

| 29                                                                                                                                            | -0.5161 | 5.5381  | 2.4651  | 2.4957  | 0.0053      |
|-----------------------------------------------------------------------------------------------------------------------------------------------|---------|---------|---------|---------|-------------|
| 30                                                                                                                                            | -5.4941 | -0.6741 | 0.8149  | -1.7844 | -0.0038     |
| 1/2[ $\langle 0   \text{del}   b \rangle \langle b   r   0 \rangle + (\langle 0   r   b \rangle \langle b   \text{del}   0 \rangle)^*$ ] (Au) |         |         |         |         |             |
| State                                                                                                                                         | X       | Y       | Z       | Dip. S. | Osc.(frdel) |
| 1                                                                                                                                             | -0.0027 | -0.0088 | -0.0070 | 0.0184  | 0.0123      |
| 2                                                                                                                                             | -0.0001 | -0.0001 | 0.0000  | 0.0002  | 0.0001      |
| 3                                                                                                                                             | -0.0033 | -0.0027 | -0.0014 | 0.0074  | 0.0049      |
| 4                                                                                                                                             | -0.0003 | -0.0032 | -0.0008 | 0.0043  | 0.0028      |
| 5                                                                                                                                             | -0.0341 | -0.0029 | -0.0338 | 0.0708  | 0.0472      |
| 6                                                                                                                                             | -0.0001 | -0.0001 | 0.0000  | 0.0002  | 0.0001      |
| 7                                                                                                                                             | -0.0021 | -0.0001 | -0.0008 | 0.0031  | 0.0021      |
| 8                                                                                                                                             | -0.0056 | -0.0029 | -0.0005 | 0.0089  | 0.0059      |
| 9                                                                                                                                             | -0.0967 | -0.1325 | -0.0413 | 0.2705  | 0.1803      |
| 10                                                                                                                                            | -0.0086 | -0.0181 | -0.0042 | 0.0310  | 0.0206      |
| 11                                                                                                                                            | -0.0305 | -0.0280 | -0.0096 | 0.0681  | 0.0454      |
| 12                                                                                                                                            | -0.1555 | -0.0380 | -0.0212 | 0.2146  | 0.1431      |
| 13                                                                                                                                            | -0.0005 | -0.0229 | -0.1289 | 0.1523  | 0.1016      |
| 14                                                                                                                                            | -0.0263 | -0.0089 | -0.0286 | 0.0638  | 0.0425      |
| 15                                                                                                                                            | -0.0027 | 0.0000  | -0.0458 | 0.0485  | 0.0323      |
| 16                                                                                                                                            | -0.0001 | -0.0088 | -0.0548 | 0.0636  | 0.0424      |
| 17                                                                                                                                            | -0.0006 | -0.0002 | 0.0000  | 0.0008  | 0.0005      |
| 18                                                                                                                                            | -0.0015 | -0.0096 | -0.0009 | 0.0120  | 0.0080      |
| 19                                                                                                                                            | -0.0006 | -0.0040 | -0.0027 | 0.0074  | 0.0049      |
| 20                                                                                                                                            | -0.0184 | -0.0099 | -0.0002 | 0.0284  | 0.0189      |
| 21                                                                                                                                            | -0.0056 | -0.0036 | -0.0001 | 0.0093  | 0.0062      |
| 22                                                                                                                                            | -0.0227 | -0.0002 | -0.0098 | 0.0327  | 0.0218      |
| 23                                                                                                                                            | -0.0040 | -0.0162 | -0.0103 | 0.0304  | 0.0203      |
| 24                                                                                                                                            | -0.0069 | -0.0003 | -0.0067 | 0.0140  | 0.0093      |
| 25                                                                                                                                            | -0.1146 | -0.0366 | -0.0007 | 0.1518  | 0.1012      |
| 26                                                                                                                                            | -0.0014 | 0.0000  | -0.0014 | 0.0028  | 0.0019      |
| 27                                                                                                                                            | -0.0010 | -0.0015 | -0.0006 | 0.0031  | 0.0020      |
| 28                                                                                                                                            | -0.0026 | -0.0018 | -0.0071 | 0.0114  | 0.0076      |
| 29                                                                                                                                            | -0.0003 | -0.0024 | -0.0002 | 0.0029  | 0.0019      |
| 30                                                                                                                                            | -0.0092 | 0.0000  | 0.0000  | 0.0092  | 0.0062      |

Ground to Excited state transition densities written to RWF 633

Excitation energies and oscillator strengths:

Excited state 1: Singlet-A 4.1888 eV 295.99 nm  $f=0.0124$   $\langle S^{*2} \rangle = 0.000$   
131 -> 133 0.47543  
132 -> 133 0.51394

This state for optimization and/or second-order correction.

Copying the Excited state density for this state as the 1-particle RhoCI density.

Excited state 2: Singlet-A 4.4961 eV 275.76 nm  $f=0.0001$   $\langle S^{*2} \rangle = 0.000$   
131 -> 133 0.51800

|                   |           |           |           |            |                                   |
|-------------------|-----------|-----------|-----------|------------|-----------------------------------|
| 132 -> 133        | -0.48098  |           |           |            |                                   |
| Excited state 3:  | Singlet-A | 4.7796 eV | 259.40 nm | $f=0.0049$ | $\langle S^{**2} \rangle = 0.000$ |
| 124 -> 133        | 0.26885   |           |           |            |                                   |
| 125 -> 133        | 0.52472   |           |           |            |                                   |
| 127 -> 133        | 0.18650   |           |           |            |                                   |
| 128 -> 133        | -0.29316  |           |           |            |                                   |
| Excited state 4:  | Singlet-A | 5.1718 eV | 239.73 nm | $f=0.0029$ | $\langle S^{**2} \rangle = 0.000$ |
| 129 -> 133        | 0.56205   |           |           |            |                                   |
| 130 -> 133        | 0.42352   |           |           |            |                                   |
| Excited state 5:  | Singlet-A | 5.2346 eV | 236.86 nm | $f=0.0477$ | $\langle S^{**2} \rangle = 0.000$ |
| 131 -> 134        | 0.39865   |           |           |            |                                   |
| 132 -> 134        | 0.56728   |           |           |            |                                   |
| Excited state 6:  | Singlet-A | 5.2627 eV | 235.59 nm | $f=0.0002$ | $\langle S^{**2} \rangle = 0.000$ |
| 129 -> 133        | -0.42364  |           |           |            |                                   |
| 130 -> 133        | 0.55751   |           |           |            |                                   |
| Excited state 7:  | Singlet-A | 5.3355 eV | 232.38 nm | $f=0.0020$ | $\langle S^{**2} \rangle = 0.000$ |
| 127 -> 134        | -0.10320  |           |           |            |                                   |
| 131 -> 134        | 0.55751   |           |           |            |                                   |
| 132 -> 134        | -0.38356  |           |           |            |                                   |
| Excited state 8:  | Singlet-A | 5.5320 eV | 224.12 nm | $f=0.0057$ | $\langle S^{**2} \rangle = 0.000$ |
| 126 -> 134        | 0.30335   |           |           |            |                                   |
| 127 -> 133        | 0.13990   |           |           |            |                                   |
| 127 -> 134        | 0.35644   |           |           |            |                                   |
| 129 -> 134        | -0.29166  |           |           |            |                                   |
| 130 -> 134        | -0.27325  |           |           |            |                                   |
| 131 -> 134        | 0.12834   |           |           |            |                                   |
| 132 -> 134        | -0.13595  |           |           |            |                                   |
| Excited state 9:  | Singlet-A | 5.5640 eV | 222.83 nm | $f=0.1827$ | $\langle S^{**2} \rangle = 0.000$ |
| 124 -> 133        | -0.22507  |           |           |            |                                   |
| 125 -> 133        | 0.25152   |           |           |            |                                   |
| 126 -> 133        | 0.18523   |           |           |            |                                   |
| 127 -> 133        | 0.35346   |           |           |            |                                   |
| 128 -> 133        | 0.42744   |           |           |            |                                   |
| Excited state 10: | Singlet-A | 5.6032 eV | 221.27 nm | $f=0.0209$ | $\langle S^{**2} \rangle = 0.000$ |
| 124 -> 133        | 0.12518   |           |           |            |                                   |
| 125 -> 133        | -0.36106  |           |           |            |                                   |
| 127 -> 133        | 0.54749   |           |           |            |                                   |
| 128 -> 133        | -0.19315  |           |           |            |                                   |
| Excited state 11: | Singlet-A | 5.6832 eV | 218.16 nm | $f=0.0458$ | $\langle S^{**2} \rangle = 0.000$ |
| 124 -> 133        | 0.10543   |           |           |            |                                   |
| 126 -> 133        | 0.67526   |           |           |            |                                   |
| 127 -> 133        | -0.10061  |           |           |            |                                   |
| 128 -> 133        | -0.11036  |           |           |            |                                   |
| Excited state 12: | Singlet-A | 5.7897 eV | 214.15 nm | $f=0.1432$ | $\langle S^{**2} \rangle = 0.000$ |
| 124 -> 133        | 0.57338   |           |           |            |                                   |
| 128 -> 133        | 0.37284   |           |           |            |                                   |

|                   |           |           |           |            |                                |
|-------------------|-----------|-----------|-----------|------------|--------------------------------|
| Excited state 13: | Singlet-A | 5.8892 eV | 210.53 nm | $f=0.1026$ | $\langle S^{*2} \rangle=0.000$ |
| 131 -> 135        | 0.23479   |           |           |            |                                |
| 131 -> 136        | -0.21703  |           |           |            |                                |
| 131 -> 137        | 0.14868   |           |           |            |                                |
| 132 -> 135        | 0.50009   |           |           |            |                                |
| 132 -> 136        | -0.21333  |           |           |            |                                |
| 132 -> 137        | 0.16213   |           |           |            |                                |
| Excited state 14: | Singlet-A | 5.9112 eV | 209.75 nm | $f=0.0434$ | $\langle S^{*2} \rangle=0.000$ |
| 131 -> 137        | -0.26285  |           |           |            |                                |
| 131 -> 139        | 0.16701   |           |           |            |                                |
| 132 -> 135        | 0.27341   |           |           |            |                                |
| 132 -> 136        | 0.52365   |           |           |            |                                |
| 132 -> 139        | -0.12136  |           |           |            |                                |
| Excited state 15: | Singlet-A | 5.9305 eV | 209.06 nm | $f=0.0323$ | $\langle S^{*2} \rangle=0.000$ |
| 131 -> 135        | 0.11136   |           |           |            |                                |
| 131 -> 136        | 0.49098   |           |           |            |                                |
| 131 -> 139        | -0.10197  |           |           |            |                                |
| 132 -> 135        | 0.24193   |           |           |            |                                |
| 132 -> 137        | -0.30837  |           |           |            |                                |
| 132 -> 139        | 0.18456   |           |           |            |                                |
| Excited state 16: | Singlet-A | 5.9727 eV | 207.59 nm | $f=0.0430$ | $\langle S^{*2} \rangle=0.000$ |
| 131 -> 135        | 0.62132   |           |           |            |                                |
| 132 -> 135        | -0.26584  |           |           |            |                                |
| Excited state 17: | Singlet-A | 5.9858 eV | 207.13 nm | $f=0.0005$ | $\langle S^{*2} \rangle=0.000$ |
| 126 -> 134        | 0.23845   |           |           |            |                                |
| 127 -> 134        | 0.29931   |           |           |            |                                |
| 129 -> 134        | 0.54207   |           |           |            |                                |
| 130 -> 134        | 0.16999   |           |           |            |                                |
| Excited state 18: | Singlet-A | 6.1169 eV | 202.69 nm | $f=0.0082$ | $\langle S^{*2} \rangle=0.000$ |
| 122 -> 133        | -0.44881  |           |           |            |                                |
| 123 -> 133        | 0.51319   |           |           |            |                                |
| Excited state 19: | Singlet-A | 6.1744 eV | 200.80 nm | $f=0.0051$ | $\langle S^{*2} \rangle=0.000$ |
| 120 -> 133        | -0.12747  |           |           |            |                                |
| 121 -> 133        | 0.17907   |           |           |            |                                |
| 122 -> 133        | 0.41898   |           |           |            |                                |
| 123 -> 133        | 0.39706   |           |           |            |                                |
| 131 -> 136        | 0.12710   |           |           |            |                                |
| 131 -> 137        | 0.14865   |           |           |            |                                |
| 132 -> 136        | 0.11056   |           |           |            |                                |
| 132 -> 137        | 0.15844   |           |           |            |                                |
| Excited state 20: | Singlet-A | 6.1778 eV | 200.69 nm | $f=0.0194$ | $\langle S^{*2} \rangle=0.000$ |
| 127 -> 134        | 0.13525   |           |           |            |                                |
| 129 -> 134        | -0.30042  |           |           |            |                                |
| 130 -> 134        | 0.60248   |           |           |            |                                |
| Excited state 21: | Singlet-A | 6.1891 eV | 200.33 nm | $f=0.0062$ | $\langle S^{*2} \rangle=0.000$ |
| 122 -> 133        | -0.23121  |           |           |            |                                |
| 123 -> 133        | -0.15445  |           |           |            |                                |
| 131 -> 136        | 0.26900   |           |           |            |                                |
| 131 -> 137        | 0.34181   |           |           |            |                                |



|                   |           |           |           |            |                                  |
|-------------------|-----------|-----------|-----------|------------|----------------------------------|
| 131 -> 140        | 0.10623   |           |           |            |                                  |
| 132 -> 136        | 0.22563   |           |           |            |                                  |
| 132 -> 137        | 0.36160   |           |           |            |                                  |
| 132 -> 140        | 0.11550   |           |           |            |                                  |
| Excited state 22: | Singlet-A | 6.2833 eV | 197.32 nm | $f=0.0222$ | $\langle S^{*2} \rangle = 0.000$ |
| 131 -> 136        | 0.25625   |           |           |            |                                  |
| 131 -> 137        | -0.16733  |           |           |            |                                  |
| 131 -> 139        | 0.11960   |           |           |            |                                  |
| 131 -> 141        | 0.18432   |           |           |            |                                  |
| 132 -> 136        | -0.25608  |           |           |            |                                  |
| 132 -> 137        | 0.18168   |           |           |            |                                  |
| 132 -> 138        | 0.42329   |           |           |            |                                  |
| 132 -> 139        | -0.11120  |           |           |            |                                  |
| 132 -> 141        | -0.15597  |           |           |            |                                  |
| Excited state 23: | Singlet-A | 6.3027 eV | 196.72 nm | $f=0.0207$ | $\langle S^{*2} \rangle = 0.000$ |
| 118 -> 133        | 0.11682   |           |           |            |                                  |
| 120 -> 133        | -0.20629  |           |           |            |                                  |
| 121 -> 133        | 0.41068   |           |           |            |                                  |
| 122 -> 133        | -0.16058  |           |           |            |                                  |
| 123 -> 133        | -0.16417  |           |           |            |                                  |
| 131 -> 136        | 0.11872   |           |           |            |                                  |
| 131 -> 137        | -0.12419  |           |           |            |                                  |
| 131 -> 138        | -0.25300  |           |           |            |                                  |
| 132 -> 138        | -0.23650  |           |           |            |                                  |
| Excited state 24: | Singlet-A | 6.3110 eV | 196.46 nm | $f=0.0095$ | $\langle S^{*2} \rangle = 0.000$ |
| 120 -> 133        | -0.15785  |           |           |            |                                  |
| 121 -> 133        | 0.33483   |           |           |            |                                  |
| 123 -> 133        | -0.12769  |           |           |            |                                  |
| 131 -> 136        | -0.12571  |           |           |            |                                  |
| 131 -> 137        | 0.11670   |           |           |            |                                  |
| 131 -> 138        | 0.27241   |           |           |            |                                  |
| 132 -> 138        | 0.37112   |           |           |            |                                  |
| 132 -> 141        | 0.10843   |           |           |            |                                  |
| Excited state 25: | Singlet-A | 6.3172 eV | 196.26 nm | $f=0.1024$ | $\langle S^{*2} \rangle = 0.000$ |
| 131 -> 137        | -0.35874  |           |           |            |                                  |
| 131 -> 139        | -0.19714  |           |           |            |                                  |
| 131 -> 141        | -0.10231  |           |           |            |                                  |
| 131 -> 143        | -0.10381  |           |           |            |                                  |
| 132 -> 137        | 0.30242   |           |           |            |                                  |
| 132 -> 139        | 0.37141   |           |           |            |                                  |
| 132 -> 140        | 0.11878   |           |           |            |                                  |
| 132 -> 143        | 0.12635   |           |           |            |                                  |
| Excited state 26: | Singlet-A | 6.3447 eV | 195.41 nm | $f=0.0018$ | $\langle S^{*2} \rangle = 0.000$ |
| 131 -> 136        | 0.10944   |           |           |            |                                  |
| 131 -> 137        | -0.11476  |           |           |            |                                  |
| 131 -> 138        | 0.48510   |           |           |            |                                  |
| 131 -> 142        | 0.15238   |           |           |            |                                  |
| 132 -> 136        | -0.10374  |           |           |            |                                  |
| 132 -> 137        | 0.15486   |           |           |            |                                  |
| 132 -> 138        | -0.19303  |           |           |            |                                  |
| 132 -> 139        | -0.23330  |           |           |            |                                  |
| 132 -> 140        | -0.13480  |           |           |            |                                  |

|                   |           |           |           |            |                                  |
|-------------------|-----------|-----------|-----------|------------|----------------------------------|
| 132 -> 142        | -0.17037  |           |           |            |                                  |
| Excited state 27: | Singlet-A | 6.3608 eV | 194.92 nm | $f=0.0021$ | $\langle S^{*2} \rangle = 0.000$ |
| 131 -> 139        | 0.38861   |           |           |            |                                  |
| 131 -> 140        | 0.32862   |           |           |            |                                  |
| 132 -> 139        | 0.19092   |           |           |            |                                  |
| 132 -> 140        | 0.32662   |           |           |            |                                  |
| 132 -> 141        | -0.11012  |           |           |            |                                  |
| 132 -> 142        | -0.19097  |           |           |            |                                  |
| Excited state 28: | Singlet-A | 6.4273 eV | 192.90 nm | $f=0.0075$ | $\langle S^{*2} \rangle = 0.000$ |
| 121 -> 133        | 0.13260   |           |           |            |                                  |
| 129 -> 135        | 0.53704   |           |           |            |                                  |
| 130 -> 135        | 0.34454   |           |           |            |                                  |
| Excited state 29: | Singlet-A | 6.4596 eV | 191.94 nm | $f=0.0020$ | $\langle S^{*2} \rangle = 0.000$ |
| 119 -> 133        | 0.10856   |           |           |            |                                  |
| 120 -> 133        | 0.46154   |           |           |            |                                  |
| 121 -> 133        | 0.31838   |           |           |            |                                  |
| 131 -> 139        | 0.15915   |           |           |            |                                  |
| 131 -> 140        | -0.14227  |           |           |            |                                  |
| 132 -> 139        | 0.14835   |           |           |            |                                  |
| 132 -> 140        | -0.19417  |           |           |            |                                  |
| Excited state 30: | Singlet-A | 6.4659 eV | 191.75 nm | $f=0.0063$ | $\langle S^{*2} \rangle = 0.000$ |
| 120 -> 133        | 0.28291   |           |           |            |                                  |
| 121 -> 133        | 0.16846   |           |           |            |                                  |
| 131 -> 137        | -0.11919  |           |           |            |                                  |
| 131 -> 139        | -0.29459  |           |           |            |                                  |
| 131 -> 140        | 0.20851   |           |           |            |                                  |
| 132 -> 137        | -0.10629  |           |           |            |                                  |
| 132 -> 139        | -0.26583  |           |           |            |                                  |
| 132 -> 140        | 0.31918   |           |           |            |                                  |
| 132 -> 141        | 0.11145   |           |           |            |                                  |

SavETr: write IOETrn= 770 NScale= 10 NData= 16 NLR=1 LETran= 520.

\*\*\*\*\*

**27. Table S1** Guaiane dimers from the *Artemisia* species.

| Condensed pattern   | Guaiane dimer                                                                                                                                                                                                                                                                                                                                                                                                                                                                                                                                                                                            | Sources                                                                                                                                                                                                                                 |
|---------------------|----------------------------------------------------------------------------------------------------------------------------------------------------------------------------------------------------------------------------------------------------------------------------------------------------------------------------------------------------------------------------------------------------------------------------------------------------------------------------------------------------------------------------------------------------------------------------------------------------------|-----------------------------------------------------------------------------------------------------------------------------------------------------------------------------------------------------------------------------------------|
| [4+2] Diels–Alder   | Arteminolides B–D, artanomaloide-2, artanomaloide A, artanomaloide C, artemisians A–D, artemisianins A–D, argyrolide O<br>Absinthin, isoabsinthin, absintholide, artenolide, absinthin A–E, isoanabsinthin, gnapholide<br>Artanomaloide-1, artanomalides A–D, artanomadimers A–F<br>Artepestrins D–G, 6 <i>a</i> -hydroxyartepestrin D, 2' <i>a</i> -hydroxyartepestrin F<br>11-Epiabsinthin, 10',11'-epiabsinthin, 11,10',11'-epiabsinthin, artesieversin<br>Caruifolins B–D, anabsin, anabsinthin<br>Artemyriantholides A–D<br>Arteminolide, 8-acetylarteminolide<br>Artselenoide<br>Lavandiolides A–L | <i>A. argyi</i><br><i>A. absinthium</i><br><i>A. anomala</i><br><i>A. rupestris</i><br><i>A. sieversiana</i><br><i>A. caruifolia</i><br><i>A. myriantha</i><br><i>A. sylvatica</i><br><i>A. selengensis</i><br><i>A. lavandulifolia</i> |
| [2+2] Cycloaddition | Artelein<br>Artesin A                                                                                                                                                                                                                                                                                                                                                                                                                                                                                                                                                                                    | <i>A. leucodes</i><br><i>A. sieversiana</i>                                                                                                                                                                                             |
| Ester linkage       | Artemisanes A–D                                                                                                                                                                                                                                                                                                                                                                                                                                                                                                                                                                                          | <i>A. argyi</i>                                                                                                                                                                                                                         |

## 28. Comparison of $^1\text{H}$ and $^{13}\text{C}$ NMR spectroscopic data for compounds 3, 4, 9, 12, and 23

Table S2 Comparison of  $^{13}\text{C}$  NMR spectroscopic data for compounds 3, 4, 9, 12, and 23 ( $\delta$  in ppm).

| No  | 3 <sup>b,d</sup> | Lavandi<br>olide A <sup>a,f</sup> | 4 <sup>b,d</sup> | Lavandiol<br>ide B <sup>a,f</sup> | 9 <sup>c,e</sup> | Lavandi<br>olide J <sup>a,f</sup> | 12 <sup>c,e</sup> | Lavandi<br>olide H <sup>a,f</sup> | 23 <sup>a,d</sup> | Lavandio<br>lide C <sup>a,f</sup> |
|-----|------------------|-----------------------------------|------------------|-----------------------------------|------------------|-----------------------------------|-------------------|-----------------------------------|-------------------|-----------------------------------|
| 1   | 66.6             | 65.0                              | 66.3             | 65.2                              | 151.3            | 150.2                             | 151.1             | 150.0                             | 71.5              | 71.4                              |
| 2   | 47.7             | 46.5                              | 47.2             | 46.4                              | 42.1             | 42.2                              | 42.3              | 42.3                              | 47.0              | 46.9                              |
| 3   | 52.2             | 51.6                              | 51.8             | 51.7                              | 53.3             | 53.9                              | 53.4              | 54.0                              | 45.6              | 45.5                              |
| 4   | 140.2            | 140.7                             | 140.1            | 141.1                             | 60.4             | 60.8                              | 60.0              | 60.4                              | 142.0             | 141.9                             |
| 5   | 136.2            | 134.2                             | 136.4            | 134.7                             | 142.4            | 143.9                             | 143.6             | 145.3                             | 134.8             | 134.8                             |
| 6   | 85.0             | 84.1                              | 84.0             | 83.6                              | 85.7             | 85.1                              | 85.2              | 84.7                              | 82.6              | 82.5                              |
| 7   | 44.6             | 43.6                              | 42.5             | 41.9                              | 46.0             | 46.3                              | 47.3              | 47.6                              | 51.6              | 51.5                              |
| 8   | 26.4             | 25.8                              | 23.9             | 23.7                              | 22.5             | 22.7                              | 24.3              | 24.5                              | 24.2              | 23.9                              |
| 9   | 41.1             | 40.0                              | 40.8             | 40.2                              | 40.5             | 41.2                              | 39.2              | 39.7                              | 41.3              | 41.2                              |
| 10  | 72.5             | 73.3                              | 72.0             | 73.2                              | 73.0             | 73.9                              | 72.5              | 73.5                              | 74.1              | 74.0                              |
| 11  | 140.4            | 139.0                             | 39.4             | 39.0                              | 38.9             | 39.2                              | 140.2             | 140.0                             | 139.1             | 139.1                             |
| 12  | 170.4            | 169.8                             | 179.3            | 179.2                             | 181.2            | 180.0                             | 170.8             | 170.3                             | 170.4             | 170.3                             |
| 13  | 120.0            | 120.1                             | 10.5             | 10.6                              | 9.5              | 10.7                              | 118.1             | 118.9                             | 120.2             | 120.1                             |
| 14  | 26.9             | 26.5                              | 26.4             | 26.5                              | 24.4             | 26.7                              | 25.6              | 27.7                              | 28.5              | 28.5                              |
| 15  | 16.6             | 15.9                              | 16.5             | 16.1                              | 16.4             | 17.5                              | 16.2              | 17.3                              | 14.6              | 14.5                              |
| 1'  | 72.4             | 72.2                              | 72.0             | 72.2                              | 72.3             | 72.2                              | 72.3              | 72.2                              | 89.4              | 89.4                              |
| 2'  | 39.9             | 39.4                              | 39.4             | 39.3                              | 38.5             | 39.2                              | 38.5              | 39.2                              | 43.0              | 43.0                              |
| 3'  | 126.0            | 125.1                             | 125.6            | 125.0                             | 124.8            | 125.2                             | 124.9             | 125.2                             | 122.4             | 122.4                             |
| 4'  | 141.7            | 141.1                             | 141.3            | 141.2                             | 140.7            | 141.0                             | 140.7             | 141.1                             | 142.2             | 142.1                             |
| 5'  | 52.5             | 52.2                              | 52.1             | 52.2                              | 51.8             | 52.6                              | 51.8              | 52.6                              | 55.2              | 55.2                              |
| 6'  | 81.4             | 80.8                              | 80.9             | 80.8                              | 80.2             | 80.0                              | 80.2              | 80.0                              | 85.2              | 85.1                              |
| 7'  | 56.0             | 55.5                              | 55.6             | 55.5                              | 52.0             | 52.4                              | 52.0              | 52.4                              | 43.7              | 43.7                              |
| 8'  | 21.6             | 20.8                              | 21.2             | 20.8                              | 20.6             | 21.1                              | 20.6              | 21.1                              | 24.0              | 24.1                              |
| 9'  | 33.5             | 33.4                              | 33.1             | 33.4                              | 31.9             | 32.9                              | 31.9              | 32.9                              | 39.4              | 39.3                              |
| 10' | 62.4             | 62.2                              | 62.0             | 62.2                              | 62.2             | 62.1                              | 62.2              | 62.1                              | 74.7              | 74.7                              |
| 11' | 55.2             | 54.4                              | 54.7             | 54.4                              | 55.9             | 55.8                              | 56.0              | 55.9                              | 55.5              | 55.4                              |
| 12' | 180.0            | 179.3                             | 179.4            | 179.3                             | 180.9            | 180.3                             | 180.8             | 180.2                             | 186.7             | 186.6                             |
| 13' | 37.0             | 36.2                              | 36.6             | 36.2                              | 34.3             | 34.7                              | 34.4              | 34.7                              | 34.5              | 34.5                              |
| 14' | 23.0             | 22.7                              | 22.6             | 22.7                              | 21.2             | 22.6                              | 21.3              | 22.6                              | 29.2              | 29.1                              |
| 15' | 19.2             | 18.7                              | 18.8             | 18.7                              | 17.5             | 18.6                              | 17.6              | 18.6                              | 17.7              | 17.6                              |

<sup>a</sup>Recorded in  $\text{CDCl}_3$ . <sup>b</sup>Recorded in pyridine-*d*<sub>5</sub>. <sup>c</sup>Recorded in  $\text{CD}_3\text{OD}$ . <sup>d</sup>Recorded at 150 MHz. <sup>e</sup>Recorded at 100 MHz. <sup>f</sup>Recorded at 126 MHz.

**Table S3** Comparison of <sup>1</sup>H NMR spectroscopic data for compounds **3**, **4**, and **9** ( $\delta$  in ppm,  $J$  in Hz).

| No. | <b>3</b> <sup>b,d</sup> | Lavandiolide A <sup>a,d</sup> | <b>4</b> <sup>b,d</sup> | Lavandiolide B <sup>a,d</sup> | <b>9</b> <sup>c,e</sup> | Lavandiolide J <sup>a,d</sup> |
|-----|-------------------------|-------------------------------|-------------------------|-------------------------------|-------------------------|-------------------------------|
| 1   |                         |                               |                         |                               |                         |                               |
| 2   | 2.05 (overlapped)       | 1.69 m                        | 1.99 (overlapped)       | 1.67 d (8.5)                  | 3.20 m                  | 3.17 dd (3.4, 1.8)            |
|     | 1.58 m                  | 1.48 d (2.3)                  | 1.51 m                  | 1.46 d (8.3)                  | 1.62 m                  | 1.53 dd (8.9, 1.6)            |
| 3   | 2.73 (overlapped)       | 2.73 m                        | 2.68 m                  | 2.72 m                        | 1.36 m                  | 1.36 (overlapped)             |
| 6   | 5.20 d (10.8)           | 4.93 dt (10.5, 2.3)           | 5.32 d (11.0)           | 5.10 d (9.0)                  | 5.57 d (10.8)           | 5.57 d (10.9)                 |
| 7   | 3.20 m                  | 3.02 td (12.2, 2.7)           | 2.70 m                  | 2.59 d (10.3)                 | 2.45 m                  | 2.42 tdd (11.6, 8.1, 3.7)     |
| 8   | 2.03 (overlapped)       | 2.18 d (11.7)                 | 1.61 m                  | 1.82 m                        | 1.91 m                  | 1.89 m                        |
|     | 1.46 m                  | 1.50 q (2.5, 2.1)             | 1.45 m                  | 1.52 s                        | 1.75 m                  | 1.69 tdd (8.9, 7.6, 4.8)      |
| 9   | 2.22 m                  | 2.02 td (13.8, 4.2)           | 2.12 m                  | 1.93 s                        | 1.80 m                  | 1.82 d (4.4)                  |
|     | 2.06 (overlapped)       | 1.83 m                        | 1.97 m                  | 1.77 d (13.6)                 | 1.79 m                  | 1.79 m                        |
| 11  | 2.54 m                  |                               | 2.54 m                  | 2.64 m                        | 2.62 m                  | 2.58 t (7.8)                  |
| 13  | 6.26 d (3.3)            | 6.24 d (3.4)                  | 1.10 d (8.0)            | 1.18 d (7.6)                  | 1.19 d (8.0)            | 1.18 d (7.7)                  |
|     | 5.43 d (3.3)            | 5.49 d (3.1)                  |                         |                               |                         |                               |
| 14  | 1.50 s                  | 1.32 s                        | 1.42 s                  | 1.29 s                        | 1.25 s                  | 1.29 s                        |
| 15  | 2.09 s                  | 1.87 d (2.3)                  | 2.03 s                  | 1.84 d (1.8)                  | 1.39 s                  | 1.40 m                        |
| 2'  | 2.65 m                  | 2.75 d (13.3)                 | 2.63 m                  | 2.75 d (10.5)                 | 2.82 m                  | 2.75 m                        |
|     | 2.19 (overlapped)       | 2.16 d (14.1)                 | 2.15 m                  | 2.18 m                        | 2.13 (overlapped)       | 2.16 d (3.4)                  |
| 3'  | 5.53 m                  | 5.56 d (2.6)                  | 5.51 m                  | 5.56 s                        | 5.60 m                  | 5.55 m                        |
| 5'  | 2.74 (overlapped)       | 2.77 s                        | 2.73 m                  | 2.77 s                        | 2.96 d (10.4)           | 2.81 m                        |
| 6'  | 4.48 dd (10.2, 10.2)    | 4.30 t (10.2)                 | 4.42 dd (10.5, 10.0)    | 4.29 t (10.2)                 | 3.99 dd (10.4, 10.0)    | 3.99 t (10.2)                 |
| 7'  | 1.83 m                  | 1.72 m                        | 1.79 m                  | 1.73 m                        | 2.05 m                  | 1.93 m                        |
| 8'  | 1.69 m                  | 1.53 dt (13.9, 3.7)           | 1.65 m                  | 1.54 m                        | 1.68 m                  | 1.58 m                        |
|     | 1.52 m                  | 1.62 dt (10.7, 3.0)           | 1.49 m                  | 1.61 m                        | 1.61 m                  | 1.53 (overlapped)             |
| 9'  | 1.92 m                  | 2.02 td (13.8, 4.2)           | 1.90 m                  | 1.87 d (9.1)                  | 2.14 m                  | 2.12 m                        |
|     | 1.76 m                  | 1.87 m                        | 1.75 m                  | 2.15 s                        | 2.13 (overlapped)       | 2.09 dd (5.0, 3.1)            |
| 13' | 2.43 d (12.0)           | 1.97 d (11.8)                 | 2.36 d (11.5)           | 1.87 ddd (11.8, 2.8, 5.6)     | 2.26 dd (12.4, 3.6)     | 2.18 m                        |
|     | 2.12 br d               | 1.85 dt (5.6, 2.6)            | 2.10 br d               | 1.93 s                        | 1.41 m                  | 1.39 m                        |
| 14' | 1.23 s                  | 1.33 s                        | 1.20 s                  | 1.33 s                        | 1.35 s                  | 1.33 s                        |
| 15' | 2.01 s                  | 1.95 dt (3.1, 1.4)            | 2.00 s                  | 1.95 d (3.3)                  | 1.93 s                  | 1.92 dt (3.2, 1.6)            |

<sup>a</sup>Recorded in CDCl<sub>3</sub>. <sup>b</sup>Recorded in pyridine-*d*<sub>5</sub>. <sup>c</sup>Recorded in CD<sub>3</sub>OD. <sup>d</sup>Recorded at 600 MHz. <sup>e</sup>Recorded at 400 MHz.

**Table S4** Comparison of <sup>1</sup>H NMR spectroscopic data for compounds **12** and **23** ( $\delta$  in ppm,  $J$  in Hz).

| No. | <b>12</b> <sup>b,d</sup>      | Lavandiolide H <sup>a,c</sup>             | <b>23</b> <sup>a,c</sup>      | Lavandiolide C <sup>a,c</sup>                    |
|-----|-------------------------------|-------------------------------------------|-------------------------------|--------------------------------------------------|
| 2   | 3.18 m                        | 3.14 m                                    | 2.33 m<br>1.63 m              | 2.33 dd (9.6, 1.5)<br>1.62 dt (9.7, 2.5)         |
| 3   | 1.65 m<br>1.41 m              | 1.56 m<br>1.37 d (1.6)                    | 2.60 m                        | 2.60 m                                           |
| 5   |                               |                                           |                               |                                                  |
| 6   | 5.37 d (10.0)                 | 5.40 d (10.2)                             | 4.47 d (10.2)                 | 4.46 dd (10.5, 1.5)                              |
| 7   | 2.99 m                        | 2.93 td (10.7, 4.8)                       | 2.70 m                        | 2.70 tt (11.0, 3.5)                              |
| 8   | 2.35 m<br>1.66 m              | 2.30 m<br>1.65 m                          | 2.13 m<br>1.56 m              | 2.13 m<br>1.57 t (2.9)                           |
| 9   | 1.86 m<br>1.85 m              | 1.89 m<br>1.87 m                          | 1.93 (overlapped)<br>1.76 m   | 1.93 (overlapped)<br>1.75 m                      |
| 11  |                               |                                           |                               |                                                  |
| 13  | 6.11 d (3.4)<br>5.58 d (3.4)  | 6.15 d (3.5)<br>5.44 d (3.2)              | 6.19 d (3.6)<br>5.52 d (3.6)  | 6.20 d (3.4)<br>5.52 d (3.1)                     |
| 14  | 1.29 s                        | 1.32 s                                    | 1.47 s                        | 1.46 s                                           |
| 15  | 1.42 s                        | 1.43 s                                    | 1.93 s                        | 1.93 s                                           |
| 2'  | 2.83 m<br>2.14 (overlapped)   | 2.76 m<br>2.13 d (3.4)                    | 2.75 m<br>2.03 m              | 2.64 m<br>2.08 ddd (15.9, 3.0, 1.6)              |
| 3'  | 5.60 m                        | 5.56 dt (4.0, 2.6)                        | 5.58 m                        | 5.44 tt (3.0, 1.6)                               |
| 5'  | 2.98 m                        | 2.82 d (10.2)                             | 2.92 d (10.2)                 | 3.25 m                                           |
| 6'  | 3.99 dd (10.4, 10.0)          | 4.00 t (10.1)                             | 4.00 dd (10.2, 10.2)          | 4.15 dd (11.0, 9.8)                              |
| 7'  | 2.07 m                        | 1.95 m                                    | 2.25 m                        | 3.19 dd (9.7, 7.7)                               |
| 8'  | 1.67 m<br>1.60 m              | 1.59 m                                    | 1.18 m<br>1.15 m              | 1.58 (overlapped)                                |
| 9'  | 2.14 (overlapped)<br>2.13 m   | 2.11 dt (5.3, 2.8)<br>2.02 m              | 2.35 m<br>1.98 m              | 2.00 td (6.8, 4.5)<br>1.54 m                     |
| 13' | 2.27 dd (12.4, 3.6)<br>1.41 m | 2.19 dd (12.3, 3.7)<br>1.39 dd (5.4, 2.4) | 1.91 dd (12.0, 3.8)<br>1.84 m | 1.75 ddd (11.7, 8.8, 4.2)<br>1.84 dd (11.9, 3.7) |
| 14' | 1.35 s                        | 1.34 s                                    | 1.31 s                        | 1.27 s                                           |
| 15' | 1.93 s                        | 1.92 dp (3.2, 1.9)                        | 1.96 s                        | 1.90 m                                           |

<sup>a</sup>Recorded in CDCl<sub>3</sub>. <sup>b</sup>Recorded in CD<sub>3</sub>OD. <sup>c</sup>Recorded at 600 MHz. <sup>d</sup>Recorded at 400 MHz.

**Table S5**  $^1\text{H}$  NMR and  $^{13}\text{C}$  NMR data for compound **23** in acetone- $d_6$  (600 MHz,  $\delta$  in ppm,  $J$  in Hz).

| No.   | $\delta_{\text{H}}$ | $\delta_{\text{C}}$    | No.    | $\delta_{\text{H}}$   | $\delta_{\text{C}}$   |
|-------|---------------------|------------------------|--------|-----------------------|-----------------------|
| 1     |                     | 72.1, C                | 1'     |                       | 89.7, C               |
| 2     | 2.23 (m)            | 47.3, CH <sub>2</sub>  | 2'     | 2.65 (m)              | 43.3, CH <sub>2</sub> |
|       | 1.56 (overlapped)   |                        |        | 2.03 (m)              |                       |
| 3     | 2.60 (m)            | 46.0, CH               | 3'     | 5.36 (br s)           | 123.4, CH             |
| 4     |                     | 136.2, C               | 4'     |                       | 141.3, C              |
| 5     |                     | 141.7, C               | 5'     | 3.30 (m)              | 55.6, CH              |
| 6     | 4.60 (d, 10.2)      | 82.6, CH               | 6'     | 4.25 (dd, 10.2, 10.2) | 86.1, CH              |
| 7     | 2.73 (m)            | 52.2, CH               | 7'     | 3.39 (m)              | 44.1, CH              |
| 8     | 2.16 (m)            | 24.7, CH <sub>2</sub>  | 8'     | 1.67 (m)              | 24.4, CH <sub>2</sub> |
|       | 1.49 (m)            |                        |        | 1.56 (overlapped)     |                       |
| 9     | 1.89 (m)            | 42.0, CH <sub>2</sub>  | 9'     | 1.87 (m)              | 40.1, CH              |
|       | 1.63 (m)            |                        |        | 1.65 (m)              |                       |
| 10    |                     | 74.5, C                | 10'    |                       | 74.9, CH <sub>2</sub> |
| 11    |                     | 140.7, C               | 11'    |                       | 56.0, C               |
| 12    |                     | 170.0, C               | 12'    |                       | 187.4, C              |
| 13    | 6.06 (d, 3.6)       | 119.3, CH <sub>2</sub> | 13'    | 1.79 (m)              | 35.0, CH <sub>2</sub> |
|       | 5.61 (d, 3.6)       |                        |        | 1.78 (m)              |                       |
| 14    | 1.44 (s)            | 29.1, CH <sub>3</sub>  | 14'    | 1.19 (s)              | 29.1, CH <sub>3</sub> |
| 15    | 1.93 (s)            | 14.5, CH <sub>3</sub>  | 15'    | 1.80 (s)              | 17.9, CH <sub>3</sub> |
| OH-10 | 4.58 (s)            |                        | OH-1'  | 4.00 (s)              |                       |
|       |                     |                        | OH-10' | 3.92 (s)              |                       |
